# Supplementary material for: Inhibition of mitochondrial protein import and proteostasis by a pro-apoptotic lipid
Source: bioRxiv preprint, doi:10.1101/2023.11.06.565743, version 3 (2025-02-14)
Supplement: Supplemental Table 6 [file 565743_file11.xlsx]

## Sheet: HD targets 100microM
Protein	Protein ID	Entry Name	Gene	Protein Length	Organism	Description	Control 1 Spectral Count	Control 2 Spectral Count	t-2-hex-alkyne 1 Spectral Count	t-2-hex-alkyne 2 Spectral Count
sp|P04840|VDAC1_YEAST	P04840	VDAC1_YEAST	POR1	283	Saccharomyces cerevisiae (strain ATCC 204508 / S288c)	Mitochondrial outer membrane protein porin 1	56	44	369	427
sp|Q00955|ACAC_YEAST	Q00955	ACAC_YEAST	ACC1	2233	Saccharomyces cerevisiae (strain ATCC 204508 / S288c)	Acetyl-CoA carboxylase	511	713	361	343
sp|P00830|ATPB_YEAST	P00830	ATPB_YEAST	ATP2	511	Saccharomyces cerevisiae (strain ATCC 204508 / S288c)	ATP synthase subunit beta, mitochondrial	78	21	231	262
sp|P18239|ADT2_YEAST	P18239	ADT2_YEAST	PET9	318	Saccharomyces cerevisiae (strain ATCC 204508 / S288c)	ADP,ATP carrier protein 2	61	68	230	290
sp|P05030|PMA1_YEAST	P05030	PMA1_YEAST	PMA1	918	Saccharomyces cerevisiae (strain ATCC 204508 / S288c)	Plasma membrane ATPase 1	65	50	225	254
sp|P32191|GPDM_YEAST	P32191	GPDM_YEAST	GUT2	649	Saccharomyces cerevisiae (strain ATCC 204508 / S288c)	Glycerol-3-phosphate dehydrogenase, mitochondrial	44	53	221	275
sp|P23641|MPCP_YEAST	P23641	MPCP_YEAST	MIR1	311	Saccharomyces cerevisiae (strain ATCC 204508 / S288c)	Mitochondrial phosphate carrier protein	50	46	204	204
sp|P07251|ATPA_YEAST	P07251	ATPA_YEAST	ATP1	545	Saccharomyces cerevisiae (strain ATCC 204508 / S288c)	ATP synthase subunit alpha, mitochondrial	55	51	200	248
sp|P46367|ALDH4_YEAST	P46367	ALDH4_YEAST	ALD4	519	Saccharomyces cerevisiae (strain ATCC 204508 / S288c)	Potassium-activated aldehyde dehydrogenase, mitochondrial	60	65	187	213
sp|P16547|OM45_YEAST	P16547	OM45_YEAST	OM45	393	Saccharomyces cerevisiae (strain ATCC 204508 / S288c)	Mitochondrial outer membrane protein OM45	22	39	172	204
sp|P19882|HSP60_YEAST	P19882	HSP60_YEAST	HSP60	572	Saccharomyces cerevisiae (strain ATCC 204508 / S288c)	Heat shock protein 60, mitochondrial	43	52	157	162
sp|P02994|EF1A_YEAST	P02994	EF1A_YEAST	TEF1	458	Saccharomyces cerevisiae (strain ATCC 204508 / S288c)	Elongation factor 1-alpha	37	58	151	175
sp|P20967|ODO1_YEAST	P20967	ODO1_YEAST	KGD1	1014	Saccharomyces cerevisiae (strain ATCC 204508 / S288c)	2-oxoglutarate dehydrogenase, mitochondrial	5	3	148	193
sp|P40215|NDH1_YEAST	P40215	NDH1_YEAST	NDE1	560	Saccharomyces cerevisiae (strain ATCC 204508 / S288c)	External NADH-ubiquinone oxidoreductase 1, mitochondrial	15	18	138	155
sp|P10591|HSP71_YEAST	P10591	HSP71_YEAST	SSA1	642	Saccharomyces cerevisiae (strain ATCC 204508 / S288c)	Heat shock protein SSA1	7	24	135	131
sp|P32563|VPP1_YEAST	P32563	VPP1_YEAST	VPH1	840	Saccharomyces cerevisiae (strain ATCC 204508 / S288c)	V-type proton ATPase subunit a, vacuolar isoform	4	5	127	154
sp|A6ZRW3|TOM70_YEAS7	A6ZRW3	TOM70_YEAS7	TOM70	617	Saccharomyces cerevisiae (strain YJM789)	Mitochondrial import receptor subunit TOM70	8	9	122	157
sp|Q03104|MSC1_YEAST	Q03104	MSC1_YEAST	MSC1	513	Saccharomyces cerevisiae (strain ATCC 204508 / S288c)	Meiotic sister chromatid recombination protein 1	0	1	116	125
sp|P07143|CY1_YEAST	P07143	CY1_YEAST	CYT1	309	Saccharomyces cerevisiae (strain ATCC 204508 / S288c)	Cytochrome c1, heme protein, mitochondrial	20	17	114	132
sp|P32891|DLD1_YEAST	P32891	DLD1_YEAST	DLD1	587	Saccharomyces cerevisiae (strain ATCC 204508 / S288c)	D-lactate dehydrogenase [cytochrome] 1, mitochondrial	7	13	109	117
sp|P38929|ATC2_YEAST	P38929	ATC2_YEAST	PMC1	1173	Saccharomyces cerevisiae (strain ATCC 204508 / S288c)	Calcium-transporting ATPase 2	1	0	107	144
sp|P36060|MCR1_YEAST	P36060	MCR1_YEAST	MCR1	302	Saccharomyces cerevisiae (strain ATCC 204508 / S288c)	NADH-cytochrome b5 reductase 2	18	22	105	130
sp|Q00711|SDHA_YEAST	Q00711	SDHA_YEAST	SDH1	640	Saccharomyces cerevisiae (strain ATCC 204508 / S288c)	Succinate dehydrogenase [ubiquinone] flavoprotein subunit, mitochondrial	15	19	102	145
sp|P07256|QCR1_YEAST	P07256	QCR1_YEAST	COR1	457	Saccharomyces cerevisiae (strain ATCC 204508 / S288c)	Cytochrome b-c1 complex subunit 1, mitochondrial	24	19	100	125
sp|P17967|PDI_YEAST	P17967	PDI_YEAST	PDI1	522	Saccharomyces cerevisiae (strain ATCC 204508 / S288c)	Protein disulfide-isomerase	0	0	99	98
sp|P17505|MDHM_YEAST	P17505	MDHM_YEAST	MDH1	334	Saccharomyces cerevisiae (strain ATCC 204508 / S288c)	Malate dehydrogenase, mitochondrial	27	14	98	116
sp|P08417|FUMH_YEAST	P08417	FUMH_YEAST	FUM1	488	Saccharomyces cerevisiae (strain ATCC 204508 / S288c)	Fumarate hydratase, mitochondrial	11	8	97	133
sp|P39109|YCFI_YEAST	P39109	YCFI_YEAST	YCF1	1515	Saccharomyces cerevisiae (strain ATCC 204508 / S288c)	Metal resistance protein YCF1	0	0	97	109
sp|A6ZZY0|MIC60_YEAS7	A6ZZY0	MIC60_YEAS7	MIC60	539	Saccharomyces cerevisiae (strain YJM789)	MICOS complex subunit MIC60	16	21	93	128
sp|P23644|TOM40_YEAST	P23644	TOM40_YEAST	TOM40	387	Saccharomyces cerevisiae (strain ATCC 204508 / S288c)	Mitochondrial import receptor subunit TOM40	12	15	93	102
sp|P32316|ACH1_YEAST	P32316	ACH1_YEAST	ACH1	526	Saccharomyces cerevisiae (strain ATCC 204508 / S288c)	Acetyl-CoA hydrolase	4	6	91	121
sp|P19414|ACON_YEAST	P19414	ACON_YEAST	ACO1	778	Saccharomyces cerevisiae (strain ATCC 204508 / S288c)	Aconitate hydratase, mitochondrial	8	15	90	167
sp|P0CS90|HSP77_YEAST	P0CS90	HSP77_YEAST	SSC1	654	Saccharomyces cerevisiae (strain ATCC 204508 / S288c)	Import motor subunit, mitochondrial	4	2	88	101
sp|P06168|ILV5_YEAST	P06168	ILV5_YEAST	ILV5	395	Saccharomyces cerevisiae (strain ATCC 204508 / S288c)	Ketol-acid reductoisomerase, mitochondrial	4	7	87	99
sp|P16474|BIP_YEAST	P16474	BIP_YEAST	KAR2	682	Saccharomyces cerevisiae (strain ATCC 204508 / S288c)	Endoplasmic reticulum chaperone BiP	5	7	87	84
sp|P30624|LCF1_YEAST	P30624	LCF1_YEAST	FAA1	700	Saccharomyces cerevisiae (strain ATCC 204508 / S288c)	Long-chain-fatty-acid--CoA ligase 1	1	6	87	133
sp|Q02776|TIM50_YEAST	Q02776	TIM50_YEAST	TIM50	476	Saccharomyces cerevisiae (strain ATCC 204508 / S288c)	Mitochondrial import inner membrane translocase subunit TIM50	0	0	87	128
sp|P16603|NCPR_YEAST	P16603	NCPR_YEAST	NCP1	691	Saccharomyces cerevisiae (strain ATCC 204508 / S288c)	NADPH--cytochrome P450 reductase	0	0	86	90
sp|P39986|SPF1_YEAST	P39986	SPF1_YEAST	SPF1	1215	Saccharomyces cerevisiae (strain ATCC 204508 / S288c)	Endoplasmic reticulum transmembrane helix translocase	1	1	86	114
sp|P00890|CISY1_YEAST	P00890	CISY1_YEAST	CIT1	479	Saccharomyces cerevisiae (strain ATCC 204508 / S288c)	Citrate synthase, mitochondrial	4	1	85	119
sp|P02992|EFTU_YEAST	P02992	EFTU_YEAST	TUF1	437	Saccharomyces cerevisiae (strain ATCC 204508 / S288c)	Elongation factor Tu, mitochondrial	3	11	82	78
sp|P21147|ACO1_YEAST	P21147	ACO1_YEAST	OLE1	510	Saccharomyces cerevisiae (strain ATCC 204508 / S288c)	Acyl-CoA desaturase 1	0	0	82	78
tr|A6ZRN1|A6ZRN1_YEAS7	A6ZRN1	A6ZRN1_YEAS7	SSB2	613	Saccharomyces cerevisiae (strain YJM789)	Stress-seventy subfamily B protein	4	14	82	87
sp|P32386|YBT1_YEAST	P32386	YBT1_YEAST	YBT1	1661	Saccharomyces cerevisiae (strain ATCC 204508 / S288c)	ATP-dependent bile acid permease	0	0	80	107
sp|P38631|FKS1_YEAST	P38631	FKS1_YEAST	FKS1	1876	Saccharomyces cerevisiae (strain ATCC 204508 / S288c)	1,3-beta-glucan synthase component FKS1	0	0	80	78
sp|P33303|SFC1_YEAST	P33303	SFC1_YEAST	SFC1	322	Saccharomyces cerevisiae (strain ATCC 204508 / S288c)	Succinate/fumarate mitochondrial transporter	5	10	78	103
sp|P39004|HXT7_YEAST	P39004	HXT7_YEAST	HXT7	570	Saccharomyces cerevisiae (strain ATCC 204508 / S288c)	High-affinity hexose transporter HXT7	3	10	78	84
sp|P32340|NDI1_YEAST	P32340	NDI1_YEAST	NDI1	513	Saccharomyces cerevisiae (strain ATCC 204508 / S288c)	Rotenone-insensitive NADH-ubiquinone oxidoreductase, mitochondrial	1	2	77	121
sp|P09624|DLDH_YEAST	P09624	DLDH_YEAST	LPD1	499	Saccharomyces cerevisiae (strain ATCC 204508 / S288c)	Dihydrolipoyl dehydrogenase, mitochondrial	2	5	75	89
sp|P21576|VPS1_YEAST	P21576	VPS1_YEAST	VPS1	704	Saccharomyces cerevisiae (strain ATCC 204508 / S288c)	Vacuolar protein sorting-associated protein 1	0	0	73	69
sp|P38077|ATPG_YEAST	P38077	ATPG_YEAST	ATP3	311	Saccharomyces cerevisiae (strain ATCC 204508 / S288c)	ATP synthase subunit gamma, mitochondrial	17	13	72	76
sp|P47075|VTC4_YEAST	P47075	VTC4_YEAST	VTC4	721	Saccharomyces cerevisiae (strain ATCC 204508 / S288c)	Vacuolar transporter chaperone complex subunit 4	1	1	72	96
sp|P54783|ALO_YEAST	P54783	ALO_YEAST	ALO1	526	Saccharomyces cerevisiae (strain ATCC 204508 / S288c)	D-arabinono-1,4-lactone oxidase	5	9	72	86
sp|P29704|ERG9_YEAST	P29704	ERG9_YEAST	ERG9	444	Saccharomyces cerevisiae (strain ATCC 204508 / S288c)	Squalene synthase ERG9	0	0	70	76
sp|P32795|YME1_YEAST	P32795	YME1_YEAST	YME1	747	Saccharomyces cerevisiae (strain ATCC 204508 / S288c)	Mitochondrial inner membrane i-AAA protease supercomplex subunit YME1	0	0	66	85
sp|P32368|SAC1_YEAST	P32368	SAC1_YEAST	SAC1	623	Saccharomyces cerevisiae (strain ATCC 204508 / S288c)	Phosphatidylinositol-3-phosphatase SAC1	0	0	65	85
sp|P17255|VATA_YEAST	P17255	VATA_YEAST	VMA1	1071	Saccharomyces cerevisiae (strain ATCC 204508 / S288c)	V-type proton ATPase catalytic subunit A	0	0	64	89
tr|A6ZXZ4|A6ZXZ4_YEAS7	A6ZXZ4	A6ZXZ4_YEAS7	PST2	198	Saccharomyces cerevisiae (strain YJM789)	Protoplasts-secreted	7	5	64	72
sp|P53312|SUCB_YEAST	P53312	SUCB_YEAST	LSC2	427	Saccharomyces cerevisiae (strain ATCC 204508 / S288c)	Succinate--CoA ligase [ADP-forming] subunit beta, mitochondrial	0	3	62	87
sp|Q04947|RTN1_YEAST	Q04947	RTN1_YEAST	RTN1	295	Saccharomyces cerevisiae (strain ATCC 204508 / S288c)	Reticulon-like protein 1	9	12	62	66
sp|P32324|EF2_YEAST	P32324	EF2_YEAST	EFT1	842	Saccharomyces cerevisiae (strain ATCC 204508 / S288c)	Elongation factor 2	2	10	61	82
sp|P07342|ILVB_YEAST	P07342	ILVB_YEAST	ILV2	687	Saccharomyces cerevisiae (strain ATCC 204508 / S288c)	Acetolactate synthase catalytic subunit, mitochondrial	2	5	59	88
sp|P14020|DPM1_YEAST	P14020	DPM1_YEAST	DPM1	267	Saccharomyces cerevisiae (strain ATCC 204508 / S288c)	Dolichol-phosphate mannosyltransferase	8	16	59	67
sp|P07257|QCR2_YEAST	P07257	QCR2_YEAST	QCR2	368	Saccharomyces cerevisiae (strain ATCC 204508 / S288c)	Cytochrome b-c1 complex subunit 2, mitochondrial	11	9	57	69
sp|Q03640|TCB3_YEAST	Q03640	TCB3_YEAST	TCB3	1545	Saccharomyces cerevisiae (strain ATCC 204508 / S288c)	Tricalbin-3	4	10	57	67
sp|P32335|MSS51_YEAST	P32335	MSS51_YEAST	MSS51	436	Saccharomyces cerevisiae (strain ATCC 204508 / S288c)	Protein MSS51, mitochondrial	0	0	54	71
sp|P33775|PMT1_YEAST	P33775	PMT1_YEAST	PMT1	817	Saccharomyces cerevisiae (strain ATCC 204508 / S288c)	Dolichyl-phosphate-mannose--protein mannosyltransferase 1	0	0	54	71
sp|P09457|ATPO_YEAST	P09457	ATPO_YEAST	ATP5	212	Saccharomyces cerevisiae (strain ATCC 204508 / S288c)	ATP synthase subunit 5, mitochondrial	26	15	53	70
sp|P31382|PMT2_YEAST	P31382	PMT2_YEAST	PMT2	759	Saccharomyces cerevisiae (strain ATCC 204508 / S288c)	Dolichyl-phosphate-mannose--protein mannosyltransferase 2	0	1	53	65
sp|P25349|YCP4_YEAST	P25349	YCP4_YEAST	YCP4	247	Saccharomyces cerevisiae (strain ATCC 204508 / S288c)	Flavoprotein-like protein YCP4	6	2	52	75
sp|P00549|KPYK1_YEAST	P00549	KPYK1_YEAST	CDC19	500	Saccharomyces cerevisiae (strain ATCC 204508 / S288c)	Pyruvate kinase 1	4	0	50	43
sp|P05626|ATPF_YEAST	P05626	ATPF_YEAST	ATP4	244	Saccharomyces cerevisiae (strain ATCC 204508 / S288c)	ATP synthase subunit 4, mitochondrial	7	6	50	46
sp|P14126|RL3_YEAST	P14126	RL3_YEAST	RPL3	387	Saccharomyces cerevisiae (strain ATCC 204508 / S288c)	Large ribosomal subunit protein uL3	4	3	50	48
sp|P38695|HXT5_YEAST	P38695	HXT5_YEAST	HXT5	592	Saccharomyces cerevisiae (strain ATCC 204508 / S288c)	Probable glucose transporter HXT5	0	1	50	65
sp|P00359|G3P3_YEAST	P00359	G3P3_YEAST	TDH3	332	Saccharomyces cerevisiae (strain ATCC 204508 / S288c)	Glyceraldehyde-3-phosphate dehydrogenase 3	3	2	49	50
sp|P08067|UCRI_YEAST	P08067	UCRI_YEAST	RIP1	215	Saccharomyces cerevisiae (strain ATCC 204508 / S288c)	Cytochrome b-c1 complex subunit Rieske, mitochondrial	0	0	49	57
sp|P40086|COX15_YEAST	P40086	COX15_YEAST	COX15	486	Saccharomyces cerevisiae (strain ATCC 204508 / S288c)	Cytochrome c oxidase assembly protein COX15	1	2	49	47
sp|Q12443|RTN2_YEAST	Q12443	RTN2_YEAST	RTN2	393	Saccharomyces cerevisiae (strain ATCC 204508 / S288c)	Reticulon-like protein 2	0	0	49	39
sp|P38825|TOM71_YEAST	P38825	TOM71_YEAST	TOM71	639	Saccharomyces cerevisiae (strain ATCC 204508 / S288c)	Protein TOM71	0	0	48	58
sp|P40341|YTA12_YEAST	P40341	YTA12_YEAST	YTA12	825	Saccharomyces cerevisiae (strain ATCC 204508 / S288c)	Mitochondrial respiratory chain complexes assembly protein YTA12	0	0	48	68
sp|P00128|QCR7_YEAST	P00128	QCR7_YEAST	QCR7	127	Saccharomyces cerevisiae (strain ATCC 204508 / S288c)	Cytochrome b-c1 complex subunit 7, mitochondrial	6	1	47	73
sp|P36035|JEN1_YEAST	P36035	JEN1_YEAST	JEN1	616	Saccharomyces cerevisiae (strain ATCC 204508 / S288c)	Carboxylic acid transporter protein homolog	0	0	47	48
sp|P36148|GPT2_YEAST	P36148	GPT2_YEAST	GPT2	743	Saccharomyces cerevisiae (strain ATCC 204508 / S288c)	Glycerol-3-phosphate O-acyltransferase 2	1	0	47	62
sp|Q08179|MDM38_YEAST	Q08179	MDM38_YEAST	MDM38	573	Saccharomyces cerevisiae (strain ATCC 204508 / S288c)	Mitochondrial distribution and morphology protein 38	0	2	47	55
sp|Q02725|VTC3_YEAST	Q02725	VTC3_YEAST	VTC3	835	Saccharomyces cerevisiae (strain ATCC 204508 / S288c)	Vacuolar transporter chaperone 3 complex subunit 3	0	0	46	78
sp|P10664|RL4A_YEAST	P10664	RL4A_YEAST	RPL4A	362	Saccharomyces cerevisiae (strain ATCC 204508 / S288c)	Large ribosomal subunit protein uL4A	10	6	45	52
sp|P41807|VATH_YEAST	P41807	VATH_YEAST	VMA13	478	Saccharomyces cerevisiae (strain ATCC 204508 / S288c)	V-type proton ATPase subunit H	0	0	45	48
sp|P28834|IDH1_YEAST	P28834	IDH1_YEAST	IDH1	360	Saccharomyces cerevisiae (strain ATCC 204508 / S288c)	Isocitrate dehydrogenase [NAD] subunit 1, mitochondrial	0	0	44	52
sp|P32897|TIM23_YEAST	P32897	TIM23_YEAST	TIM23	222	Saccharomyces cerevisiae (strain ATCC 204508 / S288c)	Mitochondrial import inner membrane translocase subunit TIM23	0	0	44	60
sp|P38295|MCFS2_YEAST	P38295	MCFS2_YEAST	EHT1	451	Saccharomyces cerevisiae (strain ATCC 204508 / S288c)	Medium-chain fatty acid ethyl ester synthase/esterase 2	0	0	44	70
sp|P39925|AFG3_YEAST	P39925	AFG3_YEAST	AFG3	761	Saccharomyces cerevisiae (strain ATCC 204508 / S288c)	Mitochondrial respiratory chain complexes assembly protein AFG3	0	0	44	45
sp|P11154|PYC1_YEAST	P11154	PYC1_YEAST	PYC1	1178	Saccharomyces cerevisiae (strain ATCC 204508 / S288c)	Pyruvate carboxylase 1	74	79	43	48
sp|P12684|HMDH2_YEAST	P12684	HMDH2_YEAST	HMG2	1045	Saccharomyces cerevisiae (strain ATCC 204508 / S288c)	3-hydroxy-3-methylglutaryl-coenzyme A reductase 2	0	0	43	52
sp|P39968|VAC8_YEAST	P39968	VAC8_YEAST	VAC8	578	Saccharomyces cerevisiae (strain ATCC 204508 / S288c)	Vacuolar protein 8	0	0	43	47
sp|P40495|LYS12_YEAST	P40495	LYS12_YEAST	LYS12	371	Saccharomyces cerevisiae (strain ATCC 204508 / S288c)	Homoisocitrate dehydrogenase, mitochondrial	7	2	43	42
sp|P47154|STE24_YEAST	P47154	STE24_YEAST	STE24	453	Saccharomyces cerevisiae (strain ATCC 204508 / S288c)	CAAX prenyl protease 1	0	0	43	49
sp|P53598|SUCA_YEAST	P53598	SUCA_YEAST	LSC1	329	Saccharomyces cerevisiae (strain ATCC 204508 / S288c)	Succinate--CoA ligase [ADP-forming] subunit alpha, mitochondrial	0	0	43	49
sp|P25297|PHO84_YEAST	P25297	PHO84_YEAST	PHO84	587	Saccharomyces cerevisiae (strain ATCC 204508 / S288c)	Inorganic phosphate transporter PHO84	0	0	42	45
sp|P40053|AIM9_YEAST	P40053	AIM9_YEAST	AIM9	627	Saccharomyces cerevisiae (strain ATCC 204508 / S288c)	Altered inheritance of mitochondria protein 9, mitochondrial	0	0	42	56
sp|P00410|COX2_YEAST	P00410	COX2_YEAST	COX2	251	Saccharomyces cerevisiae (strain ATCC 204508 / S288c)	Cytochrome c oxidase subunit 2	5	5	41	45
sp|P14772|BPT1_YEAST	P14772	BPT1_YEAST	BPT1	1559	Saccharomyces cerevisiae (strain ATCC 204508 / S288c)	Bile pigment transporter 1	0	0	41	48
sp|Q00055|GPD1_YEAST	Q00055	GPD1_YEAST	GPD1	391	Saccharomyces cerevisiae (strain ATCC 204508 / S288c)	Glycerol-3-phosphate dehydrogenase [NAD(+)] 1	0	0	41	45
sp|Q05567|SGPL_YEAST	Q05567	SGPL_YEAST	DPL1	589	Saccharomyces cerevisiae (strain ATCC 204508 / S288c)	Sphingosine-1-phosphate lyase	0	0	41	56
sp|Q07500|NDH2_YEAST	Q07500	NDH2_YEAST	NDE2	545	Saccharomyces cerevisiae (strain ATCC 204508 / S288c)	External NADH-ubiquinone oxidoreductase 2, mitochondrial	1	0	41	63
sp|P21801|SDHB_YEAST	P21801	SDHB_YEAST	SDH2	266	Saccharomyces cerevisiae (strain ATCC 204508 / S288c)	Succinate dehydrogenase [ubiquinone] iron-sulfur subunit, mitochondrial	10	15	40	44
sp|Q12029|FSF1_YEAST	Q12029	FSF1_YEAST	FSF1	327	Saccharomyces cerevisiae (strain ATCC 204508 / S288c)	Sideroflexin FSF1	1	1	40	60
sp|Q12117|MRH1_YEAST	Q12117	MRH1_YEAST	MRH1	320	Saccharomyces cerevisiae (strain ATCC 204508 / S288c)	Protein MRH1	4	4	40	54
sp|P32843|YME2_YEAST	P32843	YME2_YEAST	YME2	850	Saccharomyces cerevisiae (strain ATCC 204508 / S288c)	Mitochondrial escape protein 2	0	0	39	68
sp|P33416|HSP78_YEAST	P33416	HSP78_YEAST	HSP78	811	Saccharomyces cerevisiae (strain ATCC 204508 / S288c)	Heat shock protein 78, mitochondrial	0	0	39	68
sp|P34248|YKK0_YEAST	P34248	YKK0_YEAST	YKL100C	587	Saccharomyces cerevisiae (strain ATCC 204508 / S288c)	Probable intramembrane protease YKL100C	0	2	39	47
sp|P43585|VTC2_YEAST	P43585	VTC2_YEAST	VTC2	828	Saccharomyces cerevisiae (strain ATCC 204508 / S288c)	Vacuolar transporter chaperone complex subunit 2	0	0	39	64
sp|Q99190|TECR_YEAST	Q99190	TECR_YEAST	TSC13	310	Saccharomyces cerevisiae (strain ATCC 204508 / S288c)	Very-long-chain enoyl-CoA reductase	0	0	39	38
sp|A6ZP10|SEY1_YEAS7	A6ZP10	SEY1_YEAS7	SEY1	776	Saccharomyces cerevisiae (strain YJM789)	Protein SEY1	0	0	38	42
sp|P04037|COX4_YEAST	P04037	COX4_YEAST	COX4	155	Saccharomyces cerevisiae (strain ATCC 204508 / S288c)	Cytochrome c oxidase subunit 4, mitochondrial	3	4	38	49
sp|P06169|PDC1_YEAST	P06169	PDC1_YEAST	PDC1	563	Saccharomyces cerevisiae (strain ATCC 204508 / S288c)	Pyruvate decarboxylase isozyme 1	0	0	38	53
sp|P14906|SEC63_YEAST	P14906	SEC63_YEAST	SEC63	663	Saccharomyces cerevisiae (strain ATCC 204508 / S288c)	Protein translocation protein SEC63	0	0	38	45
sp|P25087|ERG6_YEAST	P25087	ERG6_YEAST	ERG6	383	Saccharomyces cerevisiae (strain ATCC 204508 / S288c)	Sterol 24-C-methyltransferase ERG6	0	0	38	70
sp|P28241|IDH2_YEAST	P28241	IDH2_YEAST	IDH2	369	Saccharomyces cerevisiae (strain ATCC 204508 / S288c)	Isocitrate dehydrogenase [NAD] subunit 2, mitochondrial	16	14	38	57
sp|P38694|MSC7_YEAST	P38694	MSC7_YEAST	MSC7	644	Saccharomyces cerevisiae (strain ATCC 204508 / S288c)	Putative aldehyde dehydrogenase-like protein YHR039C	0	0	38	53
sp|P46971|PMT4_YEAST	P46971	PMT4_YEAST	PMT4	762	Saccharomyces cerevisiae (strain ATCC 204508 / S288c)	Dolichyl-phosphate-mannose--protein mannosyltransferase 4	0	0	38	46
sp|P81449|ATPJ_YEAST	P81449	ATPJ_YEAST	TIM11	96	Saccharomyces cerevisiae (strain ATCC 204508 / S288c)	ATP synthase subunit e, mitochondrial	4	4	38	47
sp|Q06833|NVJ2_YEAST	Q06833	NVJ2_YEAST	NVJ2	770	Saccharomyces cerevisiae (strain ATCC 204508 / S288c)	Nucleus-vacuole junction protein 2	0	1	38	46
sp|Q08822|ETFD_YEAST	Q08822	ETFD_YEAST	CIR2	631	Saccharomyces cerevisiae (strain ATCC 204508 / S288c)	Probable electron transfer flavoprotein-ubiquinone oxidoreductase, mitochondrial	0	0	38	40
sp|P09440|C1TM_YEAST	P09440	C1TM_YEAST	MIS1	975	Saccharomyces cerevisiae (strain ATCC 204508 / S288c)	C-1-tetrahydrofolate synthase, mitochondrial	0	0	37	47
sp|P16387|ODPA_YEAST	P16387	ODPA_YEAST	PDA1	420	Saccharomyces cerevisiae (strain ATCC 204508 / S288c)	Pyruvate dehydrogenase E1 component subunit alpha, mitochondrial	4	3	37	48
sp|P38264|PHO88_YEAST	P38264	PHO88_YEAST	PHO88	188	Saccharomyces cerevisiae (strain ATCC 204508 / S288c)	SRP-independent targeting protein 3	0	0	37	35
sp|Q12466|TCB1_YEAST	Q12466	TCB1_YEAST	TCB1	1186	Saccharomyces cerevisiae (strain ATCC 204508 / S288c)	Tricalbin-1	1	0	37	48
sp|A7A1W1|RS3A1_YEAS7	A7A1W1	RS3A1_YEAS7	RPS1A	255	Saccharomyces cerevisiae (strain YJM789)	Small ribosomal subunit protein eS1A	3	8	36	38
sp|P06208|LEU1_YEAST	P06208	LEU1_YEAST	LEU4	619	Saccharomyces cerevisiae (strain ATCC 204508 / S288c)	2-isopropylmalate synthase	0	0	36	47
sp|P38250|IST2_YEAST	P38250	IST2_YEAST	IST2	946	Saccharomyces cerevisiae (strain ATCC 204508 / S288c)	Increased sodium tolerance protein 2	0	2	36	50
sp|P40318|DOA10_YEAST	P40318	DOA10_YEAST	SSM4	1319	Saccharomyces cerevisiae (strain ATCC 204508 / S288c)	ERAD-associated E3 ubiquitin-protein ligase DOA10	0	0	36	39
sp|P53868|ALG9_YEAST	P53868	ALG9_YEAST	ALG9	555	Saccharomyces cerevisiae (strain ATCC 204508 / S288c)	Alpha-1,2-mannosyltransferase ALG9	0	0	36	36
sp|P07267|CARP_YEAST	P07267	CARP_YEAST	PEP4	405	Saccharomyces cerevisiae (strain ATCC 204508 / S288c)	Saccharopepsin	0	0	35	43
sp|P39952|OXA1_YEAST	P39952	OXA1_YEAST	OXA1	402	Saccharomyces cerevisiae (strain ATCC 204508 / S288c)	Mitochondrial inner membrane protein OXA1	0	0	35	39
sp|P52893|ALAM_YEAST	P52893	ALAM_YEAST	ALT1	592	Saccharomyces cerevisiae (strain ATCC 204508 / S288c)	Probable alanine aminotransferase, mitochondrial	0	0	35	39
sp|Q12374|NCA2_YEAST	Q12374	NCA2_YEAST	NCA2	616	Saccharomyces cerevisiae (strain ATCC 204508 / S288c)	Nuclear control of ATPase protein 2	0	0	35	53
sp|P32332|OAC1_YEAST	P32332	OAC1_YEAST	OAC1	324	Saccharomyces cerevisiae (strain ATCC 204508 / S288c)	Mitochondrial oxaloacetate transport protein	0	0	34	32
sp|P40064|NU157_YEAST	P40064	NU157_YEAST	NUP157	1391	Saccharomyces cerevisiae (strain ATCC 204508 / S288c)	Nucleoporin NUP157	0	0	34	53
sp|Q04697|GSF2_YEAST	Q04697	GSF2_YEAST	GSF2	403	Saccharomyces cerevisiae (strain ATCC 204508 / S288c)	Glucose-signaling factor 2	0	0	34	54
sp|P00175|CYB2_YEAST	P00175	CYB2_YEAST	CYB2	591	Saccharomyces cerevisiae (strain ATCC 204508 / S288c)	L-lactate dehydrogenase (cytochrome)	0	0	33	26
sp|P37298|DHSD_YEAST	P37298	DHSD_YEAST	SDH4	181	Saccharomyces cerevisiae (strain ATCC 204508 / S288c)	Succinate dehydrogenase [ubiquinone] cytochrome b small subunit, mitochondrial	0	0	33	34
sp|P40075|SCS2_YEAST	P40075	SCS2_YEAST	SCS2	244	Saccharomyces cerevisiae (strain ATCC 204508 / S288c)	Vesicle-associated membrane protein-associated protein SCS2	0	1	33	38
sp|P47054|NU192_YEAST	P47054	NU192_YEAST	NUP192	1683	Saccharomyces cerevisiae (strain ATCC 204508 / S288c)	Nucleoporin NUP192	3	4	33	57
sp|P33311|MDL2_YEAST	P33311	MDL2_YEAST	MDL2	773	Saccharomyces cerevisiae (strain ATCC 204508 / S288c)	ATP-dependent permease MDL2, mitochondrial	0	0	32	45
sp|P36161|NU133_YEAST	P36161	NU133_YEAST	NUP133	1157	Saccharomyces cerevisiae (strain ATCC 204508 / S288c)	Nucleoporin NUP133	0	0	32	44
sp|P38626|NCB5R_YEAST	P38626	NCB5R_YEAST	CBR1	284	Saccharomyces cerevisiae (strain ATCC 204508 / S288c)	NADH-cytochrome b5 reductase 1	0	0	32	38
sp|P00424|COX5A_YEAST	P00424	COX5A_YEAST	COX5A	153	Saccharomyces cerevisiae (strain ATCC 204508 / S288c)	Cytochrome c oxidase subunit 5A, mitochondrial	8	1	31	25
sp|P04147|PABP_YEAST	P04147	PABP_YEAST	PAB1	577	Saccharomyces cerevisiae (strain ATCC 204508 / S288c)	Polyadenylate-binding protein, cytoplasmic and nuclear	0	0	31	25
sp|P22855|MAN1_YEAST	P22855	MAN1_YEAST	AMS1	1083	Saccharomyces cerevisiae (strain ATCC 204508 / S288c)	Alpha-mannosidase	0	0	31	32
sp|P25371|ADP1_YEAST	P25371	ADP1_YEAST	ADP1	1049	Saccharomyces cerevisiae (strain ATCC 204508 / S288c)	Probable ATP-dependent permease	0	0	31	18
sp|P25619|HSP30_YEAST	P25619	HSP30_YEAST	HSP30	332	Saccharomyces cerevisiae (strain ATCC 204508 / S288c)	30 kDa heat shock protein	0	0	31	30
sp|P36775|LONM_YEAST	P36775	LONM_YEAST	PIM1	1133	Saccharomyces cerevisiae (strain ATCC 204508 / S288c)	Lon protease homolog, mitochondrial	0	0	31	61
sp|P38137|FAT2_YEAST	P38137	FAT2_YEAST	PCS60	543	Saccharomyces cerevisiae (strain ATCC 204508 / S288c)	Oxalate--CoA ligase	0	0	31	29
sp|P38988|GGC1_YEAST	P38988	GGC1_YEAST	GGC1	300	Saccharomyces cerevisiae (strain ATCC 204508 / S288c)	Mitochondrial GTP/GDP carrier protein 1	3	18	31	43
sp|P40531|GVP36_YEAST	P40531	GVP36_YEAST	GVP36	326	Saccharomyces cerevisiae (strain ATCC 204508 / S288c)	Protein GVP36	0	0	31	36
sp|Q02981|YP109_YEAST	Q02981	YP109_YEAST	YPL109C	657	Saccharomyces cerevisiae (strain ATCC 204508 / S288c)	ABC1 family protein YPL109C, mitochondrial	0	0	31	34
sp|Q04013|YHM2_YEAST	Q04013	YHM2_YEAST	YHM2	314	Saccharomyces cerevisiae (strain ATCC 204508 / S288c)	Citrate/oxoglutarate carrier protein	7	8	31	45
sp|Q12230|LSP1_YEAST	Q12230	LSP1_YEAST	LSP1	341	Saccharomyces cerevisiae (strain ATCC 204508 / S288c)	Sphingolipid long chain base-responsive protein LSP1	2	2	31	35
sp|P32331|YMC1_YEAST	P32331	YMC1_YEAST	YMC1	307	Saccharomyces cerevisiae (strain ATCC 204508 / S288c)	Mitochondrial glycine transporter YMC1	0	0	30	43
sp|P53252|PIL1_YEAST	P53252	PIL1_YEAST	PIL1	339	Saccharomyces cerevisiae (strain ATCC 204508 / S288c)	Sphingolipid long chain base-responsive protein PIL1	0	0	30	26
sp|Q04458|HFD1_YEAST	Q04458	HFD1_YEAST	HFD1	532	Saccharomyces cerevisiae (strain ATCC 204508 / S288c)	Fatty aldehyde dehydrogenase HFD1	0	2	30	51
sp|O13535|YH11B_YEAST	O13535	YH11B_YEAST	TY1B-H	1793	Saccharomyces cerevisiae (strain ATCC 204508 / S288c)	Transposon Ty1-H Gag-Pol polyprotein	2	0	29	49
sp|P06182|CCHL_YEAST	P06182	CCHL_YEAST	CYC3	269	Saccharomyces cerevisiae (strain ATCC 204508 / S288c)	Holocytochrome-c synthase	0	0	29	29
sp|P39007|STT3_YEAST	P39007	STT3_YEAST	STT3	718	Saccharomyces cerevisiae (strain ATCC 204508 / S288c)	Dolichyl-diphosphooligosaccharide--protein glycosyltransferase subunit STT3	0	0	29	40
sp|P00927|THDH_YEAST	P00927	THDH_YEAST	ILV1	576	Saccharomyces cerevisiae (strain ATCC 204508 / S288c)	Threonine dehydratase, mitochondrial	0	0	28	41
sp|P05750|RS3_YEAST	P05750	RS3_YEAST	RPS3	240	Saccharomyces cerevisiae (strain ATCC 204508 / S288c)	Small ribosomal subunit protein uS3	0	0	28	29
sp|P12695|ODP2_YEAST	P12695	ODP2_YEAST	LAT1	482	Saccharomyces cerevisiae (strain ATCC 204508 / S288c)	Dihydrolipoyllysine-residue acetyltransferase component of pyruvate dehydrogenase complex, mitochondrial	0	0	28	29
sp|P25618|CWH43_YEAST	P25618	CWH43_YEAST	CWH43	953	Saccharomyces cerevisiae (strain ATCC 204508 / S288c)	Protein CWH43	0	0	28	32
sp|P53206|MCY1_YEAST	P53206	MCY1_YEAST	MCY1	393	Saccharomyces cerevisiae (strain ATCC 204508 / S288c)	Putative mitochondrial cysteine synthase	0	0	28	29
sp|Q08023|FMP25_YEAST	Q08023	FMP25_YEAST	FMP25	583	Saccharomyces cerevisiae (strain ATCC 204508 / S288c)	Protein FMP25, mitochondrial	0	0	28	32
sp|P00330|ADH1_YEAST	P00330	ADH1_YEAST	ADH1	348	Saccharomyces cerevisiae (strain ATCC 204508 / S288c)	Alcohol dehydrogenase 1	3	3	27	38
sp|P16521|EF3A_YEAST	P16521	EF3A_YEAST	YEF3	1044	Saccharomyces cerevisiae (strain ATCC 204508 / S288c)	Elongation factor 3A	1	4	27	53
sp|P32266|MGM1_YEAST	P32266	MGM1_YEAST	MGM1	881	Saccharomyces cerevisiae (strain ATCC 204508 / S288c)	Dynamin-like GTPase MGM1, mitochondrial	0	0	27	44
sp|P36013|MAOM_YEAST	P36013	MAOM_YEAST	MAE1	669	Saccharomyces cerevisiae (strain ATCC 204508 / S288c)	NAD-dependent malic enzyme, mitochondrial	0	0	27	42
sp|P39522|ILV3_YEAST	P39522	ILV3_YEAST	ILV3	585	Saccharomyces cerevisiae (strain ATCC 204508 / S288c)	Dihydroxy-acid dehydratase, mitochondrial	0	0	27	41
sp|P40012|PPOX_YEAST	P40012	PPOX_YEAST	HEM14	539	Saccharomyces cerevisiae (strain ATCC 204508 / S288c)	Protoporphyrinogen oxidase	0	0	27	29
sp|Q12207|NCE2_YEAST	Q12207	NCE2_YEAST	NCE102	173	Saccharomyces cerevisiae (strain ATCC 204508 / S288c)	Non-classical export protein 2	4	2	27	19
sp|A6ZRW8|YNL5_YEAS7	A6ZRW8	YNL5_YEAS7	SCY_4679	644	Saccharomyces cerevisiae (strain YJM789)	Uncharacterized vacuolar membrane protein SCY_4679	0	0	26	38
sp|P07246|ADH3_YEAST	P07246	ADH3_YEAST	ADH3	375	Saccharomyces cerevisiae (strain ATCC 204508 / S288c)	Alcohol dehydrogenase 3, mitochondrial	3	2	26	25
sp|P10614|CP51_YEAST	P10614	CP51_YEAST	ERG11	530	Saccharomyces cerevisiae (strain ATCC 204508 / S288c)	Lanosterol 14-alpha demethylase CYP51	0	0	26	51
sp|P21954|IDHP_YEAST	P21954	IDHP_YEAST	IDP1	428	Saccharomyces cerevisiae (strain ATCC 204508 / S288c)	Isocitrate dehydrogenase [NADP], mitochondrial	0	0	26	55
sp|P32916|SRPR_YEAST	P32916	SRPR_YEAST	SRP101	621	Saccharomyces cerevisiae (strain ATCC 204508 / S288c)	Signal recognition particle receptor subunit alpha homolog	0	0	26	32
sp|P33333|PLSC_YEAST	P33333	PLSC_YEAST	SLC1	303	Saccharomyces cerevisiae (strain ATCC 204508 / S288c)	1-acyl-sn-glycerol-3-phosphate acyltransferase	0	0	26	39
sp|P36139|PET10_YEAST	P36139	PET10_YEAST	PET10	283	Saccharomyces cerevisiae (strain ATCC 204508 / S288c)	Protein PET10	0	0	26	28
sp|P38968|SEC31_YEAST	P38968	SEC31_YEAST	SEC31	1273	Saccharomyces cerevisiae (strain ATCC 204508 / S288c)	Protein transport protein SEC31	0	0	26	36
sp|P49573|CTR1_YEAST	P49573	CTR1_YEAST	CTR1	406	Saccharomyces cerevisiae (strain ATCC 204508 / S288c)	Copper transport protein CTR1	0	0	26	41
sp|P53723|YN8B_YEAST	P53723	YN8B_YEAST	YNR021W	404	Saccharomyces cerevisiae (strain ATCC 204508 / S288c)	UPF0674 endoplasmic reticulum membrane protein YNR021W	0	2	26	29
sp|P53969|SAM50_YEAST	P53969	SAM50_YEAST	SAM50	484	Saccharomyces cerevisiae (strain ATCC 204508 / S288c)	Sorting assembly machinery 50 kDa subunit	0	0	26	34
sp|Q01852|TIM44_YEAST	Q01852	TIM44_YEAST	TIM44	431	Saccharomyces cerevisiae (strain ATCC 204508 / S288c)	Mitochondrial import inner membrane translocase subunit TIM44	0	0	26	15
tr|C7GY94|C7GY94_YEAS2	C7GY94	C7GY94_YEAS2	MDJ1	511	Saccharomyces cerevisiae (strain JAY291)	Mdj1p	0	0	26	46
sp|A6ZR27|ALDH5_YEAS7	A6ZR27	ALDH5_YEAS7	ALD5	520	Saccharomyces cerevisiae (strain YJM789)	Aldehyde dehydrogenase 5, mitochondrial	0	0	25	38
sp|P00560|PGK_YEAST	P00560	PGK_YEAST	PGK1	416	Saccharomyces cerevisiae (strain ATCC 204508 / S288c)	Phosphoglycerate kinase	0	0	25	35
sp|P34227|PRX1_YEAST	P34227	PRX1_YEAST	PRX1	261	Saccharomyces cerevisiae (strain ATCC 204508 / S288c)	Peroxiredoxin PRX1, mitochondrial	0	0	25	28
sp|P38181|NU170_YEAST	P38181	NU170_YEAST	NUP170	1502	Saccharomyces cerevisiae (strain ATCC 204508 / S288c)	Nucleoporin NUP170	0	0	25	33
sp|P40989|FKS2_YEAST	P40989	FKS2_YEAST	GSC2	1895	Saccharomyces cerevisiae (strain ATCC 204508 / S288c)	1,3-beta-glucan synthase component GSC2	0	0	25	38
sp|P50085|PHB2_YEAST	P50085	PHB2_YEAST	PHB2	310	Saccharomyces cerevisiae (strain ATCC 204508 / S288c)	Prohibitin-2	0	0	25	34
sp|Q02207|FOX2_YEAST	Q02207	FOX2_YEAST	FOX2	900	Saccharomyces cerevisiae (strain ATCC 204508 / S288c)	Peroxisomal hydratase-dehydrogenase-epimerase	0	0	25	31
sp|A6ZRY0|MIC27_YEAS7	A6ZRY0	MIC27_YEAS7	MIC27	234	Saccharomyces cerevisiae (strain YJM789)	MICOS complex subunit MIC27	0	0	24	40
sp|P06105|SC160_YEAST	P06105	SC160_YEAST	SCP160	1222	Saccharomyces cerevisiae (strain ATCC 204508 / S288c)	Protein SCP160	1	0	24	49
sp|P16140|VATB_YEAST	P16140	VATB_YEAST	VMA2	517	Saccharomyces cerevisiae (strain ATCC 204508 / S288c)	V-type proton ATPase subunit B	0	0	24	50
sp|P23542|AATC_YEAST	P23542	AATC_YEAST	AAT2	418	Saccharomyces cerevisiae (strain ATCC 204508 / S288c)	Aspartate aminotransferase, cytoplasmic	0	0	24	36
sp|P25605|ILV6_YEAST	P25605	ILV6_YEAST	ILV6	309	Saccharomyces cerevisiae (strain ATCC 204508 / S288c)	Acetolactate synthase small subunit, mitochondrial	0	0	24	41
sp|P32454|APE2_YEAST	P32454	APE2_YEAST	APE2	952	Saccharomyces cerevisiae (strain ATCC 204508 / S288c)	Aminopeptidase 2, mitochondrial	0	0	24	34
sp|P32473|ODPB_YEAST	P32473	ODPB_YEAST	PDB1	366	Saccharomyces cerevisiae (strain ATCC 204508 / S288c)	Pyruvate dehydrogenase E1 component subunit beta, mitochondrial	1	0	24	32
sp|P38756|TCD1_YEAST	P38756	TCD1_YEAST	TCD1	429	Saccharomyces cerevisiae (strain ATCC 204508 / S288c)	tRNA threonylcarbamoyladenosine dehydratase 1	0	0	24	18
sp|P39685|PO152_YEAST	P39685	PO152_YEAST	POM152	1337	Saccharomyces cerevisiae (strain ATCC 204508 / S288c)	Nucleoporin POM152	0	0	24	40
sp|P40319|ELO3_YEAST	P40319	ELO3_YEAST	ELO3	345	Saccharomyces cerevisiae (strain ATCC 204508 / S288c)	Elongation of fatty acids protein 3	1	0	24	29
sp|P40477|NU159_YEAST	P40477	NU159_YEAST	NUP159	1460	Saccharomyces cerevisiae (strain ATCC 204508 / S288c)	Nucleoporin NUP159	0	0	24	13
sp|Q12078|SMF3_YEAST	Q12078	SMF3_YEAST	SMF3	473	Saccharomyces cerevisiae (strain ATCC 204508 / S288c)	Iron transporter SMF3	0	0	24	25
sp|A6ZQL5|MDV1_YEAS7	A6ZQL5	MDV1_YEAS7	MDV1	714	Saccharomyces cerevisiae (strain YJM789)	Mitochondrial division protein 1	0	0	23	23
sp|P12683|HMDH1_YEAST	P12683	HMDH1_YEAST	HMG1	1054	Saccharomyces cerevisiae (strain ATCC 204508 / S288c)	3-hydroxy-3-methylglutaryl-coenzyme A reductase 1	0	0	23	29
sp|P25045|LCB1_YEAST	P25045	LCB1_YEAST	LCB1	558	Saccharomyces cerevisiae (strain ATCC 204508 / S288c)	Serine palmitoyltransferase 1	0	0	23	17
sp|P25694|CDC48_YEAST	P25694	CDC48_YEAST	CDC48	835	Saccharomyces cerevisiae (strain ATCC 204508 / S288c)	Cell division control protein 48	1	0	23	23
sp|P26321|RL5_YEAST	P26321	RL5_YEAST	RPL5	297	Saccharomyces cerevisiae (strain ATCC 204508 / S288c)	Large ribosomal subunit protein uL18	0	0	23	23
sp|P38891|BCA1_YEAST	P38891	BCA1_YEAST	BAT1	393	Saccharomyces cerevisiae (strain ATCC 204508 / S288c)	Branched-chain-amino-acid aminotransferase, mitochondrial	0	0	23	34
sp|P39006|PSD1_YEAST	P39006	PSD1_YEAST	PSD1	500	Saccharomyces cerevisiae (strain ATCC 204508 / S288c)	Phosphatidylserine decarboxylase proenzyme 1, mitochondrial	0	0	23	22
sp|Q03690|CLU_YEAST	Q03690	CLU_YEAST	CLU1	1277	Saccharomyces cerevisiae (strain ATCC 204508 / S288c)	Clustered mitochondria protein 1	0	0	23	34
sp|Q04602|VBA4_YEAST	Q04602	VBA4_YEAST	VBA4	768	Saccharomyces cerevisiae (strain ATCC 204508 / S288c)	Vacuolar basic amino acid transporter 4	2	4	23	30
sp|Q08968|SELO_YEAST	Q08968	SELO_YEAST	FMP40	688	Saccharomyces cerevisiae (strain ATCC 204508 / S288c)	Protein adenylyltransferase SelO, mitochondrial	0	0	23	30
sp|A6ZNQ1|DBP5_YEAS7	A6ZNQ1	DBP5_YEAS7	DBP5	482	Saccharomyces cerevisiae (strain YJM789)	ATP-dependent RNA helicase DBP5	0	0	22	29
sp|P00427|COX6_YEAST	P00427	COX6_YEAST	COX6	148	Saccharomyces cerevisiae (strain ATCC 204508 / S288c)	Cytochrome c oxidase subunit 6, mitochondrial	5	9	22	35
sp|P00447|SODM_YEAST	P00447	SODM_YEAST	SOD2	233	Saccharomyces cerevisiae (strain ATCC 204508 / S288c)	Superoxide dismutase [Mn], mitochondrial	0	0	22	34
sp|P11076|ARF1_YEAST	P11076	ARF1_YEAST	ARF1	181	Saccharomyces cerevisiae (strain ATCC 204508 / S288c)	ADP-ribosylation factor 1	0	0	22	26
sp|P19657|PMA2_YEAST	P19657	PMA2_YEAST	PMA2	947	Saccharomyces cerevisiae (strain ATCC 204508 / S288c)	Plasma membrane ATPase 2	0	0	22	17
sp|P28625|YIM1_YEAST	P28625	YIM1_YEAST	YIM1	365	Saccharomyces cerevisiae (strain ATCC 204508 / S288c)	Protein YIM1	0	0	22	40
sp|P32419|MDHP_YEAST	P32419	MDHP_YEAST	MDH3	343	Saccharomyces cerevisiae (strain ATCC 204508 / S288c)	Malate dehydrogenase, peroxisomal	0	1	22	20
sp|P32799|COX13_YEAST	P32799	COX13_YEAST	COX13	129	Saccharomyces cerevisiae (strain ATCC 204508 / S288c)	Cytochrome c oxidase subunit 13, mitochondrial	0	0	22	20
sp|P32901|PTR2_YEAST	P32901	PTR2_YEAST	PTR2	601	Saccharomyces cerevisiae (strain ATCC 204508 / S288c)	Peptide transporter PTR2	0	0	22	35
sp|P34077|NIC96_YEAST	P34077	NIC96_YEAST	NIC96	839	Saccharomyces cerevisiae (strain ATCC 204508 / S288c)	Nucleoporin NIC96	0	0	22	28
sp|P38011|GBLP_YEAST	P38011	GBLP_YEAST	ASC1	319	Saccharomyces cerevisiae (strain ATCC 204508 / S288c)	Small ribosomal subunit protein RACK1	1	0	22	25
sp|P38234|RFS1_YEAST	P38234	RFS1_YEAST	RFS1	210	Saccharomyces cerevisiae (strain ATCC 204508 / S288c)	Protein RFS1	0	0	22	30
sp|P40088|FTR1_YEAST	P40088	FTR1_YEAST	FTR1	404	Saccharomyces cerevisiae (strain ATCC 204508 / S288c)	Plasma membrane iron permease	0	0	22	21
sp|P41805|RL10_YEAST	P41805	RL10_YEAST	RPL10	221	Saccharomyces cerevisiae (strain ATCC 204508 / S288c)	Large ribosomal subunit protein uL16	5	4	22	30
sp|P53266|SHY1_YEAST	P53266	SHY1_YEAST	SHY1	389	Saccharomyces cerevisiae (strain ATCC 204508 / S288c)	Cytochrome oxidase assembly protein SHY1	0	0	22	29
sp|Q03028|ODC1_YEAST	Q03028	ODC1_YEAST	ODC1	310	Saccharomyces cerevisiae (strain ATCC 204508 / S288c)	Mitochondrial 2-oxodicarboxylate carrier 1	4	5	22	42
sp|Q04080|GPI17_YEAST	Q04080	GPI17_YEAST	GPI17	534	Saccharomyces cerevisiae (strain ATCC 204508 / S288c)	GPI transamidase component GPI17	0	0	22	22
sp|P05759|RS31_YEAST	P05759	RS31_YEAST	RPS31	152	Saccharomyces cerevisiae (strain ATCC 204508 / S288c)	Ubiquitin-ribosomal protein eS31 fusion protein	9	12	21	30
sp|P20107|ZRC1_YEAST	P20107	ZRC1_YEAST	ZRC1	442	Saccharomyces cerevisiae (strain ATCC 204508 / S288c)	Vacuolar zinc transporter ZRC1	3	1	21	27
sp|P38993|FET3_YEAST	P38993	FET3_YEAST	FET3	636	Saccharomyces cerevisiae (strain ATCC 204508 / S288c)	Iron transport multicopper oxidase FET3	8	1	21	27
sp|P41543|OST1_YEAST	P41543	OST1_YEAST	OST1	476	Saccharomyces cerevisiae (strain ATCC 204508 / S288c)	Dolichyl-diphosphooligosaccharide--protein glycosyltransferase subunit 1	0	0	21	16
sp|P42839|VNX1_YEAST	P42839	VNX1_YEAST	VNX1	908	Saccharomyces cerevisiae (strain ATCC 204508 / S288c)	Low affinity vacuolar monovalent cation/H(+) antiporter	0	0	21	36
sp|P60010|ACT_YEAST	P60010	ACT_YEAST	ACT1	375	Saccharomyces cerevisiae (strain ATCC 204508 / S288c)	Actin	16	5	21	25
sp|P80967|TOM5_YEAST	P80967	TOM5_YEAST	TOM5	50	Saccharomyces cerevisiae (strain ATCC 204508 / S288c)	Mitochondrial import receptor subunit TOM5	0	0	21	34
sp|A6ZTW2|SHE10_YEAS7	A6ZTW2	SHE10_YEAS7	SHE10	577	Saccharomyces cerevisiae (strain YJM789)	Outer spore wall assembly protein SHE10	0	1	20	37
sp|A6ZZV7|LAC1_YEAS7	A6ZZV7	LAC1_YEAS7	LAC1	418	Saccharomyces cerevisiae (strain YJM789)	Sphingosine N-acyltransferase LAC1	0	0	20	12
sp|P25340|ERG4_YEAST	P25340	ERG4_YEAST	ERG4	473	Saccharomyces cerevisiae (strain ATCC 204508 / S288c)	Delta(24(24(1)))-sterol reductase ERG4	0	0	20	39
sp|P28737|MSP1_YEAST	P28737	MSP1_YEAST	MSP1	362	Saccharomyces cerevisiae (strain ATCC 204508 / S288c)	Outer mitochondrial transmembrane helix translocase	0	0	20	24
sp|P32939|YPT7_YEAST	P32939	YPT7_YEAST	YPT7	208	Saccharomyces cerevisiae (strain ATCC 204508 / S288c)	Ypt/Rab-type GTPase YPT7	0	0	20	22
sp|P38221|CDS1_YEAST	P38221	CDS1_YEAST	CDS1	457	Saccharomyces cerevisiae (strain ATCC 204508 / S288c)	Phosphatidate cytidylyltransferase	0	0	20	24
sp|P39533|ACON2_YEAST	P39533	ACON2_YEAST	ACO2	789	Saccharomyces cerevisiae (strain ATCC 204508 / S288c)	Homocitrate dehydratase, mitochondrial	0	0	20	22
sp|P47045|TIM54_YEAST	P47045	TIM54_YEAST	TIM54	478	Saccharomyces cerevisiae (strain ATCC 204508 / S288c)	Mitochondrial import inner membrane translocase subunit TIM54	0	0	20	28
sp|P50087|MIC26_YEAST	P50087	MIC26_YEAST	MIC26	233	Saccharomyces cerevisiae (strain ATCC 204508 / S288c)	MICOS subunit MIC26	1	2	20	26
sp|P53898|NSG2_YEAST	P53898	NSG2_YEAST	NSG2	299	Saccharomyces cerevisiae (strain ATCC 204508 / S288c)	Protein NSG2	0	0	20	17
sp|Q08548|ALE1_YEAST	Q08548	ALE1_YEAST	ALE1	619	Saccharomyces cerevisiae (strain ATCC 204508 / S288c)	Lysophospholipid acyltransferase	0	0	20	27
sp|Q08818|MSC6_YEAST	Q08818	MSC6_YEAST	MSC6	692	Saccharomyces cerevisiae (strain ATCC 204508 / S288c)	Meiotic sister-chromatid recombination protein 6, mitochondrial	0	0	20	31
sp|P16622|HEMH_YEAST	P16622	HEMH_YEAST	HEM15	393	Saccharomyces cerevisiae (strain ATCC 204508 / S288c)	Ferrochelatase, mitochondrial	0	0	19	41
sp|P21375|OSM1_YEAST	P21375	OSM1_YEAST	OSM1	501	Saccharomyces cerevisiae (strain ATCC 204508 / S288c)	Fumarate reductase 2	0	0	19	31
sp|P33767|OSTB_YEAST	P33767	OSTB_YEAST	WBP1	430	Saccharomyces cerevisiae (strain ATCC 204508 / S288c)	Dolichyl-diphosphooligosaccharide--protein glycosyltransferase subunit WBP1	0	0	19	36
sp|P35729|NU120_YEAST	P35729	NU120_YEAST	NUP120	1037	Saccharomyces cerevisiae (strain ATCC 204508 / S288c)	Nucleoporin NUP120	0	0	19	24
sp|P40970|LCB2_YEAST	P40970	LCB2_YEAST	LCB2	561	Saccharomyces cerevisiae (strain ATCC 204508 / S288c)	Serine palmitoyltransferase 2	0	0	19	21
sp|P42934|PMT6_YEAST	P42934	PMT6_YEAST	PMT6	759	Saccharomyces cerevisiae (strain ATCC 204508 / S288c)	Dolichyl-phosphate-mannose--protein mannosyltransferase 6	0	0	19	26
sp|P43636|ALG2_YEAST	P43636	ALG2_YEAST	ALG2	503	Saccharomyces cerevisiae (strain ATCC 204508 / S288c)	Alpha-1,3/1,6-mannosyltransferase ALG2	0	0	19	28
sp|P48570|HOSC_YEAST	P48570	HOSC_YEAST	LYS20	428	Saccharomyces cerevisiae (strain ATCC 204508 / S288c)	Homocitrate synthase, cytosolic isozyme	0	0	19	40
sp|P52593|NU188_YEAST	P52593	NU188_YEAST	NUP188	1655	Saccharomyces cerevisiae (strain ATCC 204508 / S288c)	Nucleoporin NUP188	0	0	19	27
sp|Q03327|UGO1_YEAST	Q03327	UGO1_YEAST	UGO1	502	Saccharomyces cerevisiae (strain ATCC 204508 / S288c)	Mitochondrial fusion and transport protein UGO1	0	0	19	30
sp|Q08970|MMT2_YEAST	Q08970	MMT2_YEAST	MMT2	484	Saccharomyces cerevisiae (strain ATCC 204508 / S288c)	Mitochondrial metal transporter 2	0	0	19	20
sp|Q12082|YD157_YEAST	Q12082	YD157_YEAST	YDL157C	118	Saccharomyces cerevisiae (strain ATCC 204508 / S288c)	Uncharacterized protein YDL157C, mitochondrial	0	0	19	11
sp|Q12164|POM33_YEAST	Q12164	POM33_YEAST	POM33	279	Saccharomyces cerevisiae (strain ATCC 204508 / S288c)	Pore membrane protein of 33 kDa	0	0	19	23
sp|Q12697|YPK9_YEAST	Q12697	YPK9_YEAST	YPK9	1472	Saccharomyces cerevisiae (strain ATCC 204508 / S288c)	Vacuolar cation-transporting ATPase YPK9	0	0	19	51
sp|A6ZLG8|OM14_YEAS7	A6ZLG8	OM14_YEAS7	OM14	134	Saccharomyces cerevisiae (strain YJM789)	Mitochondrial outer membrane protein OM14	4	0	18	33
sp|P0CX35|RS4A_YEAST	P0CX35	RS4A_YEAST	RPS4A	261	Saccharomyces cerevisiae (strain ATCC 204508 / S288c)	Small ribosomal subunit protein eS4A	1	1	18	24
sp|P13586|ATC1_YEAST	P13586	ATC1_YEAST	PMR1	950	Saccharomyces cerevisiae (strain ATCC 204508 / S288c)	Calcium-transporting ATPase 1	0	0	18	24
sp|P18900|COQ1_YEAST	P18900	COQ1_YEAST	COQ1	473	Saccharomyces cerevisiae (strain ATCC 204508 / S288c)	Hexaprenyl pyrophosphate synthase, mitochondrial	0	0	18	16
sp|P38353|SSH1_YEAST	P38353	SSH1_YEAST	SSH1	490	Saccharomyces cerevisiae (strain ATCC 204508 / S288c)	Sec sixty-one protein homolog	0	0	18	29
sp|P38523|GRPE_YEAST	P38523	GRPE_YEAST	MGE1	228	Saccharomyces cerevisiae (strain ATCC 204508 / S288c)	GrpE protein homolog, mitochondrial	0	0	18	23
sp|P38703|LAG1_YEAST	P38703	LAG1_YEAST	LAG1	411	Saccharomyces cerevisiae (strain ATCC 204508 / S288c)	Ceramide synthase LAG1	0	0	18	23
sp|P40483|YIK8_YEAST	P40483	YIK8_YEAST	YIL108W	696	Saccharomyces cerevisiae (strain ATCC 204508 / S288c)	Putative zinc metalloproteinase YIL108W	0	0	18	18
sp|P40515|FIS1_YEAST	P40515	FIS1_YEAST	FIS1	155	Saccharomyces cerevisiae (strain ATCC 204508 / S288c)	Mitochondrial fission 1 protein	1	1	18	17
sp|P40527|ATC7_YEAST	P40527	ATC7_YEAST	NEO1	1151	Saccharomyces cerevisiae (strain ATCC 204508 / S288c)	Phospholipid-transporting ATPase NEO1	0	0	18	30
sp|P46672|ARC1_YEAST	P46672	ARC1_YEAST	ARC1	376	Saccharomyces cerevisiae (strain ATCC 204508 / S288c)	tRNA-aminoacylation cofactor ARC1	58	55	18	27
sp|P53507|TOM7_YEAST	P53507	TOM7_YEAST	TOM7	60	Saccharomyces cerevisiae (strain ATCC 204508 / S288c)	Mitochondrial import receptor subunit TOM7	0	0	18	11
sp|P53730|ALG12_YEAST	P53730	ALG12_YEAST	ALG12	551	Saccharomyces cerevisiae (strain ATCC 204508 / S288c)	Dol-P-Man:Man(7)GlcNAc(2)-PP-Dol alpha-1,6-mannosyltransferase	0	0	18	22
sp|Q04228|UBX2_YEAST	Q04228	UBX2_YEAST	UBX2	584	Saccharomyces cerevisiae (strain ATCC 204508 / S288c)	UBX domain-containing protein 2	0	0	18	22
sp|A6ZUG8|CHO2_YEAS7	A6ZUG8	CHO2_YEAS7	CHO2	869	Saccharomyces cerevisiae (strain YJM789)	Phosphatidylethanolamine N-methyltransferase	0	0	17	36
sp|A7A0V3|RSSA2_YEAS7	A7A0V3	RSSA2_YEAS7	RPS0B	252	Saccharomyces cerevisiae (strain YJM789)	Small ribosomal subunit protein uS2B	0	0	17	17
sp|P0CX55|RS18A_YEAST	P0CX55	RS18A_YEAST	RPS18A	146	Saccharomyces cerevisiae (strain ATCC 204508 / S288c)	Small ribosomal subunit protein uS13A	0	2	17	14
sp|P17709|HXKG_YEAST	P17709	HXKG_YEAST	GLK1	500	Saccharomyces cerevisiae (strain ATCC 204508 / S288c)	Glucokinase-1	0	0	17	29
sp|P20606|SAR1_YEAST	P20606	SAR1_YEAST	SAR1	190	Saccharomyces cerevisiae (strain ATCC 204508 / S288c)	Small COPII coat GTPase SAR1	0	0	17	20
sp|P25574|EMC1_YEAST	P25574	EMC1_YEAST	EMC1	760	Saccharomyces cerevisiae (strain ATCC 204508 / S288c)	ER membrane protein complex subunit 1	0	1	17	28
sp|P30902|ATP7_YEAST	P30902	ATP7_YEAST	ATP7	174	Saccharomyces cerevisiae (strain ATCC 204508 / S288c)	ATP synthase subunit d, mitochondrial	6	2	17	28
sp|P32798|COT1_YEAST	P32798	COT1_YEAST	COT1	439	Saccharomyces cerevisiae (strain ATCC 204508 / S288c)	Vacuolar zinc transporter COT1	0	2	17	30
sp|P39926|SSO2_YEAST	P39926	SSO2_YEAST	SSO2	295	Saccharomyces cerevisiae (strain ATCC 204508 / S288c)	Protein SSO2	0	0	17	23
sp|P40035|PIC2_YEAST	P40035	PIC2_YEAST	PIC2	300	Saccharomyces cerevisiae (strain ATCC 204508 / S288c)	Mitochondrial phosphate carrier protein 2	0	1	17	31
sp|P40069|IMB4_YEAST	P40069	IMB4_YEAST	KAP123	1113	Saccharomyces cerevisiae (strain ATCC 204508 / S288c)	Importin subunit beta-4	0	0	17	25
sp|P40185|MMF1_YEAST	P40185	MMF1_YEAST	MMF1	145	Saccharomyces cerevisiae (strain ATCC 204508 / S288c)	Protein MMF1, mitochondrial	13	14	17	13
sp|P49367|LYS4_YEAST	P49367	LYS4_YEAST	LYS4	693	Saccharomyces cerevisiae (strain ATCC 204508 / S288c)	Homoaconitase, mitochondrial	0	0	17	34
sp|P53199|ERG26_YEAST	P53199	ERG26_YEAST	ERG26	349	Saccharomyces cerevisiae (strain ATCC 204508 / S288c)	Sterol-4-alpha-carboxylate 3-dehydrogenase ERG26, decarboxylating	0	0	17	21
sp|P53879|RHO5_YEAST	P53879	RHO5_YEAST	RHO5	331	Saccharomyces cerevisiae (strain ATCC 204508 / S288c)	GTP-binding protein RHO5	0	0	17	17
sp|Q03281|HEH2_YEAST	Q03281	HEH2_YEAST	HEH2	663	Saccharomyces cerevisiae (strain ATCC 204508 / S288c)	Inner nuclear membrane protein HEH2	0	0	17	27
sp|Q06485|ATG33_YEAST	Q06485	ATG33_YEAST	ATG33	197	Saccharomyces cerevisiae (strain ATCC 204508 / S288c)	Autophagy-related protein 33	0	0	17	24
sp|Q12452|ERG27_YEAST	Q12452	ERG27_YEAST	ERG27	347	Saccharomyces cerevisiae (strain ATCC 204508 / S288c)	3-keto-steroid reductase ERG27	0	0	17	26
sp|A6ZM32|RCF1_YEAS7	A6ZM32	RCF1_YEAS7	RCF1	159	Saccharomyces cerevisiae (strain YJM789)	Respiratory supercomplex factor 1, mitochondrial	0	0	16	20
sp|A6ZTA5|AIM46_YEAS7	A6ZTA5	AIM46_YEAS7	AIM46	310	Saccharomyces cerevisiae (strain YJM789)	Altered inheritance of mitochondria protein 46, mitochondrial	0	0	16	32
sp|P00044|CYC1_YEAST	P00044	CYC1_YEAST	CYC1	109	Saccharomyces cerevisiae (strain ATCC 204508 / S288c)	Cytochrome c isoform 1	3	4	16	16
sp|P07255|COX9_YEAST	P07255	COX9_YEAST	COX9	59	Saccharomyces cerevisiae (strain ATCC 204508 / S288c)	Cytochrome c oxidase subunit 9, mitochondrial	0	1	16	10
sp|P0C0W9|RL11A_YEAST	P0C0W9	RL11A_YEAST	RPL11A	174	Saccharomyces cerevisiae (strain ATCC 204508 / S288c)	Large ribosomal subunit protein uL5A	0	1	16	10
sp|P10823|GPA2_YEAST	P10823	GPA2_YEAST	GPA2	449	Saccharomyces cerevisiae (strain ATCC 204508 / S288c)	Guanine nucleotide-binding protein alpha-2 subunit	0	0	16	32
sp|P11914|MPPA_YEAST	P11914	MPPA_YEAST	MAS2	482	Saccharomyces cerevisiae (strain ATCC 204508 / S288c)	Mitochondrial-processing peptidase subunit alpha	0	0	16	29
sp|P25443|RS2_YEAST	P25443	RS2_YEAST	RPS2	254	Saccharomyces cerevisiae (strain ATCC 204508 / S288c)	Small ribosomal subunit protein uS5	2	6	16	19
sp|P27514|PHO91_YEAST	P27514	PHO91_YEAST	PHO91	894	Saccharomyces cerevisiae (strain ATCC 204508 / S288c)	Low-affinity phosphate transporter PHO91	0	0	16	18
sp|P33421|SDH3_YEAST	P33421	SDH3_YEAST	SDH3	198	Saccharomyces cerevisiae (strain ATCC 204508 / S288c)	Succinate dehydrogenase [ubiquinone] cytochrome b subunit, mitochondrial	2	1	16	21
sp|P36051|MCD4_YEAST	P36051	MCD4_YEAST	MCD4	919	Saccharomyces cerevisiae (strain ATCC 204508 / S288c)	GPI ethanolamine phosphate transferase 1	0	0	16	22
sp|P38555|YPT31_YEAST	P38555	YPT31_YEAST	YPT31	223	Saccharomyces cerevisiae (strain ATCC 204508 / S288c)	GTP-binding protein YPT31/YPT8	0	0	16	24
sp|P40169|YNT4_YEAST	P40169	YNT4_YEAST	YNL194C	301	Saccharomyces cerevisiae (strain ATCC 204508 / S288c)	Uncharacterized plasma membrane protein YNL194C	0	0	16	19
sp|P40501|AVT7_YEAST	P40501	AVT7_YEAST	AVT7	490	Saccharomyces cerevisiae (strain ATCC 204508 / S288c)	Vacuolar amino acid transporter 7	0	0	16	15
sp|P48015|GCST_YEAST	P48015	GCST_YEAST	GCV1	400	Saccharomyces cerevisiae (strain ATCC 204508 / S288c)	Aminomethyltransferase, mitochondrial	0	0	16	16
sp|Q06169|PEX30_YEAST	Q06169	PEX30_YEAST	PEX30	523	Saccharomyces cerevisiae (strain ATCC 204508 / S288c)	Peroxisomal membrane protein PEX30	0	0	16	22
sp|Q06493|YLH47_YEAST	Q06493	YLH47_YEAST	YLH47	454	Saccharomyces cerevisiae (strain ATCC 204508 / S288c)	LETM1 domain-containing protein YLH47, mitochondrial	0	0	16	24
sp|Q07651|FMP45_YEAST	Q07651	FMP45_YEAST	FMP45	309	Saccharomyces cerevisiae (strain ATCC 204508 / S288c)	SUR7 family protein FMP45	0	0	16	30
sp|Q12200|NPC1_YEAST	Q12200	NPC1_YEAST	NCR1	1170	Saccharomyces cerevisiae (strain ATCC 204508 / S288c)	NPC intracellular sterol transporter 1-related protein 1	0	0	16	17
sp|Q12428|PRPD_YEAST	Q12428	PRPD_YEAST	PDH1	516	Saccharomyces cerevisiae (strain ATCC 204508 / S288c)	Probable 2-methylcitrate dehydratase	0	0	16	25
sp|A6ZQJ1|IF4A_YEAS7	A6ZQJ1	IF4A_YEAS7	TIF1	395	Saccharomyces cerevisiae (strain YJM789)	ATP-dependent RNA helicase eIF4A	0	0	15	13
sp|P00401|COX1_YEAST	P00401	COX1_YEAST	COX1	534	Saccharomyces cerevisiae (strain ATCC 204508 / S288c)	Cytochrome c oxidase subunit 1	0	0	15	32
sp|P02406|RL28_YEAST	P02406	RL28_YEAST	RPL28	149	Saccharomyces cerevisiae (strain ATCC 204508 / S288c)	Large ribosomal subunit protein uL15	4	11	15	23
sp|P08456|PSS_YEAST	P08456	PSS_YEAST	CHO1	276	Saccharomyces cerevisiae (strain ATCC 204508 / S288c)	CDP-diacylglycerol--serine O-phosphatidyltransferase	0	0	15	24
sp|P08525|QCR8_YEAST	P08525	QCR8_YEAST	QCR8	94	Saccharomyces cerevisiae (strain ATCC 204508 / S288c)	Cytochrome b-c1 complex subunit 8, mitochondrial	0	0	15	27
sp|P0CX37|RS6A_YEAST	P0CX37	RS6A_YEAST	RPS6A	236	Saccharomyces cerevisiae (strain ATCC 204508 / S288c)	Small ribosomal subunit protein eS6A	9	17	15	16
sp|P14907|NSP1_YEAST	P14907	NSP1_YEAST	NSP1	823	Saccharomyces cerevisiae (strain ATCC 204508 / S288c)	Nucleoporin NSP1	0	0	15	11
sp|P22137|CLH_YEAST	P22137	CLH_YEAST	CHC1	1653	Saccharomyces cerevisiae (strain ATCC 204508 / S288c)	Clathrin heavy chain	0	0	15	29
sp|P38079|YRO2_YEAST	P38079	YRO2_YEAST	YRO2	344	Saccharomyces cerevisiae (strain ATCC 204508 / S288c)	Protein YRO2	1	1	15	11
sp|P38219|OLA1_YEAST	P38219	OLA1_YEAST	OLA1	394	Saccharomyces cerevisiae (strain ATCC 204508 / S288c)	Obg-like ATPase 1	0	1	15	21
sp|P39012|GAA1_YEAST	P39012	GAA1_YEAST	GAA1	614	Saccharomyces cerevisiae (strain ATCC 204508 / S288c)	GPI transamidase component GAA1	0	0	15	30
sp|P39515|TIM17_YEAST	P39515	TIM17_YEAST	TIM17	158	Saccharomyces cerevisiae (strain ATCC 204508 / S288c)	Mitochondrial import inner membrane translocase subunit TIM17	0	0	15	23
sp|P40024|ARB1_YEAST	P40024	ARB1_YEAST	ARB1	610	Saccharomyces cerevisiae (strain ATCC 204508 / S288c)	ABC transporter ATP-binding protein ARB1	0	0	15	22
sp|P40212|RL13B_YEAST	P40212	RL13B_YEAST	RPL13B	199	Saccharomyces cerevisiae (strain ATCC 204508 / S288c)	Large ribosomal subunit protein eL13B	2	7	15	14
sp|P40364|MPM1_YEAST	P40364	MPM1_YEAST	MPM1	252	Saccharomyces cerevisiae (strain ATCC 204508 / S288c)	Mitochondrial peculiar membrane protein 1	0	0	15	20
sp|P40528|SYG1_YEAST	P40528	SYG1_YEAST	SYG1	902	Saccharomyces cerevisiae (strain ATCC 204508 / S288c)	Protein SYG1	0	0	15	27
sp|P47082|AVT1_YEAST	P47082	AVT1_YEAST	AVT1	602	Saccharomyces cerevisiae (strain ATCC 204508 / S288c)	Vacuolar amino acid transporter 1	0	0	15	35
sp|P50110|SAM37_YEAST	P50110	SAM37_YEAST	SAM37	327	Saccharomyces cerevisiae (strain ATCC 204508 / S288c)	Sorting assembly machinery 37 kDa subunit	0	0	15	16
sp|P53008|CWH41_YEAST	P53008	CWH41_YEAST	CWH41	833	Saccharomyces cerevisiae (strain ATCC 204508 / S288c)	Mannosyl-oligosaccharide glucosidase	0	0	15	23
sp|Q06451|TPO3_YEAST	Q06451	TPO3_YEAST	TPO3	622	Saccharomyces cerevisiae (strain ATCC 204508 / S288c)	Polyamine transporter 3	0	0	15	11
sp|A6ZP47|DED1_YEAS7	A6ZP47	DED1_YEAS7	DED1	604	Saccharomyces cerevisiae (strain YJM789)	ATP-dependent RNA helicase DED1	0	0	14	18
sp|B3LQG6|AIM24_YEAS1	B3LQG6	AIM24_YEAS1	AIM24	394	Saccharomyces cerevisiae (strain RM11-1a)	Altered inheritance of mitochondria protein 24, mitochondrial	0	0	14	32
sp|P00431|CCPR_YEAST	P00431	CCPR_YEAST	CCP1	361	Saccharomyces cerevisiae (strain ATCC 204508 / S288c)	Cytochrome c peroxidase, mitochondrial	0	0	14	13
sp|P01123|YPT1_YEAST	P01123	YPT1_YEAST	YPT1	206	Saccharomyces cerevisiae (strain ATCC 204508 / S288c)	GTP-binding protein YPT1	6	0	14	25
sp|P05317|RLA0_YEAST	P05317	RLA0_YEAST	RPP0	312	Saccharomyces cerevisiae (strain ATCC 204508 / S288c)	Large ribosomal subunit protein uL10	0	0	14	14
sp|P06780|RHO1_YEAST	P06780	RHO1_YEAST	RHO1	209	Saccharomyces cerevisiae (strain ATCC 204508 / S288c)	GTP-binding protein RHO1	0	0	14	16
sp|P07275|PUT2_YEAST	P07275	PUT2_YEAST	PUT2	575	Saccharomyces cerevisiae (strain ATCC 204508 / S288c)	Delta-1-pyrroline-5-carboxylate dehydrogenase, mitochondrial	0	0	14	42
sp|P0CX84|RL35A_YEAST	P0CX84	RL35A_YEAST	RPL35A	120	Saccharomyces cerevisiae (strain ATCC 204508 / S288c)	Large ribosomal subunit protein uL29A	0	1	14	11
sp|P18962|DAP2_YEAST	P18962	DAP2_YEAST	DAP2	818	Saccharomyces cerevisiae (strain ATCC 204508 / S288c)	Dipeptidyl aminopeptidase B	0	0	14	26
sp|P19262|ODO2_YEAST	P19262	ODO2_YEAST	KGD2	463	Saccharomyces cerevisiae (strain ATCC 204508 / S288c)	Dihydrolipoyllysine-residue succinyltransferase component of 2-oxoglutarate dehydrogenase complex, mitochondrial	0	0	14	25
sp|P25379|STDH_YEAST	P25379	STDH_YEAST	CHA1	360	Saccharomyces cerevisiae (strain ATCC 204508 / S288c)	Catabolic L-serine/threonine dehydratase	0	0	14	32
sp|P25719|CYPC_YEAST	P25719	CYPC_YEAST	CPR3	182	Saccharomyces cerevisiae (strain ATCC 204508 / S288c)	Peptidyl-prolyl cis-trans isomerase C, mitochondrial	0	0	14	17
sp|P32602|SEC17_YEAST	P32602	SEC17_YEAST	SEC17	292	Saccharomyces cerevisiae (strain ATCC 204508 / S288c)	Alpha-soluble NSF attachment protein	0	0	14	15
sp|P36101|TCD2_YEAST	P36101	TCD2_YEAST	TCD2	447	Saccharomyces cerevisiae (strain ATCC 204508 / S288c)	tRNA threonylcarbamoyladenosine dehydratase 2	0	0	14	29
sp|P37293|NAT2_YEAST	P37293	NAT2_YEAST	NAT2	288	Saccharomyces cerevisiae (strain ATCC 204508 / S288c)	Putative N-terminal acetyltransferase 2	0	0	14	15
sp|P38286|MKAR_YEAST	P38286	MKAR_YEAST	IFA38	347	Saccharomyces cerevisiae (strain ATCC 204508 / S288c)	Very-long-chain 3-oxoacyl-CoA reductase	0	0	14	24
sp|P40471|AYR1_YEAST	P40471	AYR1_YEAST	AYR1	297	Saccharomyces cerevisiae (strain ATCC 204508 / S288c)	NADPH-dependent 1-acyldihydroxyacetone phosphate reductase	0	0	14	15
sp|P53154|GUP1_YEAST	P53154	GUP1_YEAST	GUP1	560	Saccharomyces cerevisiae (strain ATCC 204508 / S288c)	Membrane-bound O-acyltransferase GUP1	0	0	14	25
sp|P53721|RCF2_YEAST	P53721	RCF2_YEAST	RCF2	224	Saccharomyces cerevisiae (strain ATCC 204508 / S288c)	Respiratory supercomplex factor 2, mitochondrial	0	1	14	15
sp|P54003|SUR7_YEAST	P54003	SUR7_YEAST	SUR7	302	Saccharomyces cerevisiae (strain ATCC 204508 / S288c)	Protein SUR7	0	0	14	9
sp|P54781|ERG5_YEAST	P54781	ERG5_YEAST	ERG5	538	Saccharomyces cerevisiae (strain ATCC 204508 / S288c)	C-22 sterol desaturase ERG5	0	0	14	20
sp|Q00245|RHO3_YEAST	Q00245	RHO3_YEAST	RHO3	231	Saccharomyces cerevisiae (strain ATCC 204508 / S288c)	GTP-binding protein RHO3	0	0	14	17
sp|Q02753|RL21A_YEAST	Q02753	RL21A_YEAST	RPL21A	160	Saccharomyces cerevisiae (strain ATCC 204508 / S288c)	Large ribosomal subunit protein eL21A	8	9	14	15
sp|Q06405|ATPK_YEAST	Q06405	ATPK_YEAST	ATP17	101	Saccharomyces cerevisiae (strain ATCC 204508 / S288c)	ATP synthase subunit f, mitochondrial	0	0	14	14
sp|Q06508|LOA1_YEAST	Q06508	LOA1_YEAST	LOA1	300	Saccharomyces cerevisiae (strain ATCC 204508 / S288c)	Lysophosphatidic acid:oleoyl-CoA acyltransferase 1	0	0	14	15
sp|Q07825|FRA1_YEAST	Q07825	FRA1_YEAST	FRA1	749	Saccharomyces cerevisiae (strain ATCC 204508 / S288c)	Putative Xaa-Pro aminopeptidase FRA1	0	0	14	24
sp|Q12165|ATPD_YEAST	Q12165	ATPD_YEAST	ATP16	160	Saccharomyces cerevisiae (strain ATCC 204508 / S288c)	ATP synthase subunit delta, mitochondrial	0	0	14	14
sp|Q12270|RBD2_YEAST	Q12270	RBD2_YEAST	RBD2	262	Saccharomyces cerevisiae (strain ATCC 204508 / S288c)	Rhomboid protein 2	0	0	14	5
sp|Q12375|ORT1_YEAST	Q12375	ORT1_YEAST	ORT1	292	Saccharomyces cerevisiae (strain ATCC 204508 / S288c)	Mitochondrial ornithine transporter 1	0	0	14	12
sp|Q12382|DGK1_YEAST	Q12382	DGK1_YEAST	DGK1	290	Saccharomyces cerevisiae (strain ATCC 204508 / S288c)	CTP-dependent diacylglycerol kinase 1	0	0	14	10
sp|Q99385|VCX1_YEAST	Q99385	VCX1_YEAST	VCX1	411	Saccharomyces cerevisiae (strain ATCC 204508 / S288c)	Vacuolar calcium ion transporter	0	0	14	20
sp|A6ZLK2|MIC12_YEAS7	A6ZLK2	MIC12_YEAS7	AIM5	106	Saccharomyces cerevisiae (strain YJM789)	MICOS complex subunit MIC12	0	0	13	17
sp|A6ZNW6|RTC5_YEAS7	A6ZNW6	RTC5_YEAS7	RTC5	567	Saccharomyces cerevisiae (strain YJM789)	Restriction of telomere capping protein 5	0	0	13	11
sp|P08539|GPA1_YEAST	P08539	GPA1_YEAST	GPA1	472	Saccharomyces cerevisiae (strain ATCC 204508 / S288c)	Guanine nucleotide-binding protein alpha-1 subunit	0	0	13	18
sp|P0CX82|RL19A_YEAST	P0CX82	RL19A_YEAST	RPL19A	189	Saccharomyces cerevisiae (strain ATCC 204508 / S288c)	Large ribosomal subunit protein eL19A	24	20	13	18
sp|P29311|BMH1_YEAST	P29311	BMH1_YEAST	BMH1	267	Saccharomyces cerevisiae (strain ATCC 204508 / S288c)	Protein BMH1	4	0	13	12
sp|P31412|VATC_YEAST	P31412	VATC_YEAST	VMA5	392	Saccharomyces cerevisiae (strain ATCC 204508 / S288c)	V-type proton ATPase subunit C	0	0	13	21
sp|P32353|ERG3_YEAST	P32353	ERG3_YEAST	ERG3	365	Saccharomyces cerevisiae (strain ATCC 204508 / S288c)	Delta(7)-sterol 5(6)-desaturase ERG3	0	0	13	24
sp|P32599|FIMB_YEAST	P32599	FIMB_YEAST	SAC6	642	Saccharomyces cerevisiae (strain ATCC 204508 / S288c)	Fimbrin	0	0	13	24
sp|P32792|YHH7_YEAST	P32792	YHH7_YEAST	YSC83	385	Saccharomyces cerevisiae (strain ATCC 204508 / S288c)	UPF0744 protein YSC83	0	0	13	15
sp|P38152|TXTP_YEAST	P38152	TXTP_YEAST	CTP1	299	Saccharomyces cerevisiae (strain ATCC 204508 / S288c)	Tricarboxylate transport protein	0	0	13	16
sp|P38225|FAT1_YEAST	P38225	FAT1_YEAST	FAT1	669	Saccharomyces cerevisiae (strain ATCC 204508 / S288c)	Very long-chain fatty acid transport protein	0	0	13	18
sp|P39722|GEM1_YEAST	P39722	GEM1_YEAST	GEM1	662	Saccharomyces cerevisiae (strain ATCC 204508 / S288c)	Mitochondrial Rho GTPase 1	0	0	13	21
sp|P39932|STL1_YEAST	P39932	STL1_YEAST	STL1	569	Saccharomyces cerevisiae (strain ATCC 204508 / S288c)	Sugar transporter STL1	0	0	13	15
sp|P39940|RSP5_YEAST	P39940	RSP5_YEAST	RSP5	809	Saccharomyces cerevisiae (strain ATCC 204508 / S288c)	E3 ubiquitin-protein ligase RSP5	0	0	13	24
sp|P39996|GTT3_YEAST	P39996	GTT3_YEAST	GTT3	337	Saccharomyces cerevisiae (strain ATCC 204508 / S288c)	Glutathione transferase 3	0	0	13	25
sp|P47912|LCF4_YEAST	P47912	LCF4_YEAST	FAA4	694	Saccharomyces cerevisiae (strain ATCC 204508 / S288c)	Long-chain-fatty-acid--CoA ligase 4	0	0	13	11
sp|P53140|RMD9_YEAST	P53140	RMD9_YEAST	RMD9	646	Saccharomyces cerevisiae (strain ATCC 204508 / S288c)	RNA-binding protein RMD9, mitochondrial	0	0	13	19
sp|Q04472|MGR3_YEAST	Q04472	MGR3_YEAST	MGR3	501	Saccharomyces cerevisiae (strain ATCC 204508 / S288c)	Mitochondrial inner membrane i-AAA protease supercomplex subunit MGR3	0	0	13	12
sp|Q06142|IMB1_YEAST	Q06142	IMB1_YEAST	KAP95	861	Saccharomyces cerevisiae (strain ATCC 204508 / S288c)	Importin subunit beta-1	0	0	13	30
sp|Q06630|MHR1_YEAST	Q06630	MHR1_YEAST	MHR1	226	Saccharomyces cerevisiae (strain ATCC 204508 / S288c)	Large ribosomal subunit protein mL67	0	0	13	20
sp|Q07878|VPS13_YEAST	Q07878	VPS13_YEAST	VPS13	3144	Saccharomyces cerevisiae (strain ATCC 204508 / S288c)	Intermembrane lipid transfer protein VPS13	0	0	13	49
sp|Q08001|LAM6_YEAST	Q08001	LAM6_YEAST	LAM6	693	Saccharomyces cerevisiae (strain ATCC 204508 / S288c)	Membrane-anchored lipid-binding protein LAM6	0	0	13	12
sp|Q12233|ATPN_YEAST	Q12233	ATPN_YEAST	ATP20	115	Saccharomyces cerevisiae (strain ATCC 204508 / S288c)	ATP synthase subunit g, mitochondrial	4	5	13	20
sp|Q12333|FRE7_YEAST	Q12333	FRE7_YEAST	FRE7	620	Saccharomyces cerevisiae (strain ATCC 204508 / S288c)	Ferric/cupric reductase transmembrane component 7	0	0	13	15
sp|P0CX39|RS8A_YEAST	P0CX39	RS8A_YEAST	RPS8A	200	Saccharomyces cerevisiae (strain ATCC 204508 / S288c)	Small ribosomal subunit protein eS8A	11	10	12	14
sp|P14693|SAM35_YEAST	P14693	SAM35_YEAST	SAM35	329	Saccharomyces cerevisiae (strain ATCC 204508 / S288c)	Sorting assembly machinery 35 kDa subunit	0	0	12	13
sp|P21825|SEC62_YEAST	P21825	SEC62_YEAST	SEC62	274	Saccharomyces cerevisiae (strain ATCC 204508 / S288c)	Translocation protein SEC62	0	0	12	16
sp|P23180|AIM17_YEAST	P23180	AIM17_YEAST	AIM17	465	Saccharomyces cerevisiae (strain ATCC 204508 / S288c)	Probable oxidoreductase AIM17	0	0	12	20
sp|P23292|KC12_YEAST	P23292	KC12_YEAST	YCK2	546	Saccharomyces cerevisiae (strain ATCC 204508 / S288c)	Casein kinase I homolog 2	0	0	12	22
sp|P26786|RS7A_YEAST	P26786	RS7A_YEAST	RPS7A	190	Saccharomyces cerevisiae (strain ATCC 204508 / S288c)	Small ribosomal subunit protein eS7A	0	0	12	18
sp|P32339|HMX1_YEAST	P32339	HMX1_YEAST	HMX1	317	Saccharomyces cerevisiae (strain ATCC 204508 / S288c)	Heme-binding protein HMX1	0	0	12	11
sp|P32660|ATC5_YEAST	P32660	ATC5_YEAST	DNF1	1571	Saccharomyces cerevisiae (strain ATCC 204508 / S288c)	Phospholipid-transporting ATPase DNF1	0	0	12	17
sp|P32796|CACP_YEAST	P32796	CACP_YEAST	CAT2	670	Saccharomyces cerevisiae (strain ATCC 204508 / S288c)	Carnitine O-acetyltransferase, mitochondrial	0	0	12	30
sp|P32802|TMN1_YEAST	P32802	TMN1_YEAST	EMP70	667	Saccharomyces cerevisiae (strain ATCC 204508 / S288c)	Transmembrane 9 superfamily member 1	0	0	12	14
sp|P33310|MDL1_YEAST	P33310	MDL1_YEAST	MDL1	695	Saccharomyces cerevisiae (strain ATCC 204508 / S288c)	ATP-dependent permease MDL1, mitochondrial	0	0	12	12
sp|P36008|EF1G2_YEAST	P36008	EF1G2_YEAST	TEF4	412	Saccharomyces cerevisiae (strain ATCC 204508 / S288c)	Elongation factor 1-gamma 2	0	0	12	13
sp|P37299|QCR10_YEAST	P37299	QCR10_YEAST	QCR10	77	Saccharomyces cerevisiae (strain ATCC 204508 / S288c)	Cytochrome b-c1 complex subunit 10, mitochondrial	0	0	12	12
sp|P38166|SFT2_YEAST	P38166	SFT2_YEAST	SFT2	215	Saccharomyces cerevisiae (strain ATCC 204508 / S288c)	Protein transport protein SFT2	0	0	12	9
sp|P53337|ERV29_YEAST	P53337	ERV29_YEAST	ERV29	310	Saccharomyces cerevisiae (strain ATCC 204508 / S288c)	ER-derived vesicles protein ERV29	0	0	12	9
sp|P53736|YN8O_YEAST	P53736	YN8O_YEAST	YNR040W	256	Saccharomyces cerevisiae (strain ATCC 204508 / S288c)	Uncharacterized protein YNR040W	0	0	12	19
sp|Q02630|NU116_YEAST	Q02630	NU116_YEAST	NUP116	1113	Saccharomyces cerevisiae (strain ATCC 204508 / S288c)	Nucleoporin NUP116/NSP116	0	0	12	15
sp|Q06497|ANT1_YEAST	Q06497	ANT1_YEAST	ANT1	328	Saccharomyces cerevisiae (strain ATCC 204508 / S288c)	Peroxisomal adenine nucleotide transporter 1	0	0	12	7
sp|Q06567|MCP2_YEAST	Q06567	MCP2_YEAST	MCP2	569	Saccharomyces cerevisiae (strain ATCC 204508 / S288c)	ABC1 family protein MCP2	0	0	12	19
sp|Q12296|MAM3_YEAST	Q12296	MAM3_YEAST	MAM3	706	Saccharomyces cerevisiae (strain ATCC 204508 / S288c)	Protein MAM3	0	0	12	33
sp|Q12480|ETFA_YEAST	Q12480	ETFA_YEAST	AIM45	344	Saccharomyces cerevisiae (strain ATCC 204508 / S288c)	Probable electron transfer flavoprotein subunit alpha, mitochondrial	0	0	12	17
sp|Q12482|AGC1_YEAST	Q12482	AGC1_YEAST	AGC1	902	Saccharomyces cerevisiae (strain ATCC 204508 / S288c)	Mitochondrial aspartate-glutamate transporter AGC1	0	0	12	22
sp|P00925|ENO2_YEAST	P00925	ENO2_YEAST	ENO2	437	Saccharomyces cerevisiae (strain ATCC 204508 / S288c)	Enolase 2	0	0	11	19
sp|P06197|PIS_YEAST	P06197	PIS_YEAST	PIS1	220	Saccharomyces cerevisiae (strain ATCC 204508 / S288c)	CDP-diacylglycerol--inositol 3-phosphatidyltransferase	0	0	11	12
sp|P06367|RS14A_YEAST	P06367	RS14A_YEAST	RPS14A	137	Saccharomyces cerevisiae (strain ATCC 204508 / S288c)	Small ribosomal subunit protein uS11A	0	1	11	12
sp|P0CX23|RL20A_YEAST	P0CX23	RL20A_YEAST	RPL20A	172	Saccharomyces cerevisiae (strain ATCC 204508 / S288c)	Large ribosomal subunit protein eL20A	0	1	11	14
sp|P0CX47|RS11A_YEAST	P0CX47	RS11A_YEAST	RPS11A	156	Saccharomyces cerevisiae (strain ATCC 204508 / S288c)	Small ribosomal subunit protein uS17A	3	8	11	11
sp|P18411|FUN14_YEAST	P18411	FUN14_YEAST	FUN14	198	Saccharomyces cerevisiae (strain ATCC 204508 / S288c)	Protein FUN14	0	0	11	9
sp|P25358|ELO2_YEAST	P25358	ELO2_YEAST	ELO2	347	Saccharomyces cerevisiae (strain ATCC 204508 / S288c)	Elongation of fatty acids protein 2	0	0	11	9
sp|P27929|NAM9_YEAST	P27929	NAM9_YEAST	NAM9	486	Saccharomyces cerevisiae (strain ATCC 204508 / S288c)	Small ribosomal subunit protein uS4m	0	0	11	18
sp|P32366|VA0D_YEAST	P32366	VA0D_YEAST	VMA6	345	Saccharomyces cerevisiae (strain ATCC 204508 / S288c)	V-type proton ATPase subunit d	1	0	11	19
sp|P32906|MNS1_YEAST	P32906	MNS1_YEAST	MNS1	549	Saccharomyces cerevisiae (strain ATCC 204508 / S288c)	Endoplasmic reticulum mannosyl-oligosaccharide 1,2-alpha-mannosidase	0	0	11	15
sp|P36017|VPS21_YEAST	P36017	VPS21_YEAST	VPS21	210	Saccharomyces cerevisiae (strain ATCC 204508 / S288c)	Vacuolar protein sorting-associated protein 21	0	0	11	13
sp|P36062|AVT3_YEAST	P36062	AVT3_YEAST	AVT3	692	Saccharomyces cerevisiae (strain ATCC 204508 / S288c)	Vacuolar amino acid transporter 3	0	0	11	19
sp|P37291|GLYC_YEAST	P37291	GLYC_YEAST	SHM2	469	Saccharomyces cerevisiae (strain ATCC 204508 / S288c)	Serine hydroxymethyltransferase, cytosolic	0	0	11	22
sp|P38127|RIM2_YEAST	P38127	RIM2_YEAST	RIM2	377	Saccharomyces cerevisiae (strain ATCC 204508 / S288c)	Mitochondrial carrier protein RIM2	0	0	11	17
sp|P38169|KMO_YEAST	P38169	KMO_YEAST	BNA4	460	Saccharomyces cerevisiae (strain ATCC 204508 / S288c)	Kynurenine 3-monooxygenase	0	0	11	10
sp|P38310|FTH1_YEAST	P38310	FTH1_YEAST	FTH1	465	Saccharomyces cerevisiae (strain ATCC 204508 / S288c)	Iron transporter FTH1	0	0	11	16
sp|P38837|NSG1_YEAST	P38837	NSG1_YEAST	NSG1	291	Saccharomyces cerevisiae (strain ATCC 204508 / S288c)	Protein NSG1	0	0	11	16
sp|P38966|VTC5_YEAST	P38966	VTC5_YEAST	VTC5	869	Saccharomyces cerevisiae (strain ATCC 204508 / S288c)	Vacuole transporter chaperone complex subunit 5	0	0	11	17
sp|P39676|FHP_YEAST	P39676	FHP_YEAST	YHB1	399	Saccharomyces cerevisiae (strain ATCC 204508 / S288c)	Flavohemoprotein	0	0	11	28
sp|P39994|PXP1_YEAST	P39994	PXP1_YEAST	PXP1	560	Saccharomyces cerevisiae (strain ATCC 204508 / S288c)	Putative 2-hydroxyacyl-CoA lyase	0	0	11	22
sp|P40066|GLE2_YEAST	P40066	GLE2_YEAST	GLE2	365	Saccharomyces cerevisiae (strain ATCC 204508 / S288c)	mRNA export factor GLE2	0	0	11	9
sp|P47133|EMC2_YEAST	P47133	EMC2_YEAST	EMC2	292	Saccharomyces cerevisiae (strain ATCC 204508 / S288c)	ER membrane protein complex subunit 2	0	0	11	8
sp|Q03362|YD476_YEAST	Q03362	YD476_YEAST	YDR476C	224	Saccharomyces cerevisiae (strain ATCC 204508 / S288c)	Uncharacterized protein YDR476C	0	0	11	12
sp|Q03558|OYE2_YEAST	Q03558	OYE2_YEAST	OYE2	400	Saccharomyces cerevisiae (strain ATCC 204508 / S288c)	NADPH dehydrogenase 2	14	8	11	11
sp|Q04935|COX20_YEAST	Q04935	COX20_YEAST	COX20	205	Saccharomyces cerevisiae (strain ATCC 204508 / S288c)	Cytochrome c oxidase assembly protein COX20, mitochondrial	0	0	11	27
sp|Q05787|HRD3_YEAST	Q05787	HRD3_YEAST	HRD3	833	Saccharomyces cerevisiae (strain ATCC 204508 / S288c)	ERAD-associated E3 ubiquitin-protein ligase component HRD3	0	0	11	11
sp|Q06143|DIC1_YEAST	Q06143	DIC1_YEAST	DIC1	298	Saccharomyces cerevisiae (strain ATCC 204508 / S288c)	Mitochondrial dicarboxylate transporter	0	0	11	13
sp|Q08972|NEW1_YEAST	Q08972	NEW1_YEAST	NEW1	1196	Saccharomyces cerevisiae (strain ATCC 204508 / S288c)	[NU+] prion formation protein 1	0	0	11	7
sp|Q12010|YPQ1_YEAST	Q12010	YPQ1_YEAST	YPQ1	308	Saccharomyces cerevisiae (strain ATCC 204508 / S288c)	Probable vacuolar amino acid transporter YPQ1	0	0	11	21
sp|A6ZML5|AIM36_YEAS7	A6ZML5	AIM36_YEAS7	AIM36	255	Saccharomyces cerevisiae (strain YJM789)	Altered inheritance of mitochondria protein 36, mitochondrial	0	0	10	15
sp|A7A0X4|EFGM_YEAS7	A7A0X4	EFGM_YEAS7	MEF1	761	Saccharomyces cerevisiae (strain YJM789)	Elongation factor G, mitochondrial	0	0	10	12
sp|C7GTL7|AEP2_YEAS2	C7GTL7	AEP2_YEAS2	AEP2	580	Saccharomyces cerevisiae (strain JAY291)	ATPase expression protein 2, mitochondrial	0	0	10	6
sp|P05756|RS13_YEAST	P05756	RS13_YEAST	RPS13	151	Saccharomyces cerevisiae (strain ATCC 204508 / S288c)	Small ribosomal subunit protein uS15	0	0	10	9
sp|P07560|SEC4_YEAST	P07560	SEC4_YEAST	SEC4	215	Saccharomyces cerevisiae (strain ATCC 204508 / S288c)	Ras-related protein SEC4	0	0	10	14
sp|P08466|NUC1_YEAST	P08466	NUC1_YEAST	NUC1	329	Saccharomyces cerevisiae (strain ATCC 204508 / S288c)	Mitochondrial nuclease	0	0	10	19
sp|P0CX41|RL23A_YEAST	P0CX41	RL23A_YEAST	RPL23A	137	Saccharomyces cerevisiae (strain ATCC 204508 / S288c)	Large ribosomal subunit protein uL14A	2	2	10	16
sp|P0CX43|RL1A_YEAST	P0CX43	RL1A_YEAST	RPL1A	217	Saccharomyces cerevisiae (strain ATCC 204508 / S288c)	Large ribosomal subunit protein uL1A	0	0	10	9
sp|P10662|RT01_YEAST	P10662	RT01_YEAST	MRP1	321	Saccharomyces cerevisiae (strain ATCC 204508 / S288c)	Small ribosomal subunit protein mS43	0	0	10	9
sp|P14540|ALF_YEAST	P14540	ALF_YEAST	FBA1	359	Saccharomyces cerevisiae (strain ATCC 204508 / S288c)	Fructose-bisphosphate aldolase	0	0	10	22
sp|P15108|HSC82_YEAST	P15108	HSC82_YEAST	HSC82	705	Saccharomyces cerevisiae (strain ATCC 204508 / S288c)	ATP-dependent molecular chaperone HSC82	0	0	10	17
sp|P15424|MS116_YEAST	P15424	MS116_YEAST	MSS116	664	Saccharomyces cerevisiae (strain ATCC 204508 / S288c)	ATP-dependent RNA helicase MSS116, mitochondrial	0	0	10	17
sp|P19073|CDC42_YEAST	P19073	CDC42_YEAST	CDC42	191	Saccharomyces cerevisiae (strain ATCC 204508 / S288c)	Cell division control protein 42	0	0	10	13
sp|P25376|AGP1_YEAST	P25376	AGP1_YEAST	AGP1	633	Saccharomyces cerevisiae (strain ATCC 204508 / S288c)	General amino acid permease AGP1	0	0	10	15
sp|P32787|MG101_YEAST	P32787	MG101_YEAST	MGM101	269	Saccharomyces cerevisiae (strain ATCC 204508 / S288c)	Mitochondrial genome maintenance protein MGM101	0	0	10	14
sp|P32791|FRE1_YEAST	P32791	FRE1_YEAST	FRE1	686	Saccharomyces cerevisiae (strain ATCC 204508 / S288c)	Ferric/cupric reductase transmembrane component 1	0	0	10	20
sp|P32915|SC61A_YEAST	P32915	SC61A_YEAST	SEC61	480	Saccharomyces cerevisiae (strain ATCC 204508 / S288c)	Protein transport protein SEC61	0	0	10	12
sp|P36016|LHS1_YEAST	P36016	LHS1_YEAST	LHS1	881	Saccharomyces cerevisiae (strain ATCC 204508 / S288c)	Heat shock protein 70 homolog LHS1	0	0	10	15
sp|P36147|PAM17_YEAST	P36147	PAM17_YEAST	PAM17	197	Saccharomyces cerevisiae (strain ATCC 204508 / S288c)	Presequence translocated-associated motor subunit PAM17, mitochondrial	4	7	10	19
sp|P38085|TAT1_YEAST	P38085	TAT1_YEAST	TAT1	619	Saccharomyces cerevisiae (strain ATCC 204508 / S288c)	Valine/tyrosine/tryptophan amino-acid permease 1	0	0	10	20
sp|P38873|KOG1_YEAST	P38873	KOG1_YEAST	KOG1	1557	Saccharomyces cerevisiae (strain ATCC 204508 / S288c)	Target of rapamycin complex 1 subunit KOG1	0	0	10	9
sp|P39980|SIT1_YEAST	P39980	SIT1_YEAST	SIT1	628	Saccharomyces cerevisiae (strain ATCC 204508 / S288c)	Siderophore iron transporter 1	0	0	10	15
sp|P40416|ATM1_YEAST	P40416	ATM1_YEAST	ATM1	690	Saccharomyces cerevisiae (strain ATCC 204508 / S288c)	Iron-sulfur clusters transporter ATM1, mitochondrial	1	0	10	27
sp|P43613|ERJ5_YEAST	P43613	ERJ5_YEAST	ERJ5	295	Saccharomyces cerevisiae (strain ATCC 204508 / S288c)	ER-localized J domain-containing protein 5	0	0	10	13
sp|P46965|SPC1_YEAST	P46965	SPC1_YEAST	SPC1	94	Saccharomyces cerevisiae (strain ATCC 204508 / S288c)	Signal peptidase complex subunit 1	0	0	10	9
sp|P47818|CCC1_YEAST	P47818	CCC1_YEAST	CCC1	322	Saccharomyces cerevisiae (strain ATCC 204508 / S288c)	Protein CCC1	0	0	10	16
sp|P48164|RS7B_YEAST	P48164	RS7B_YEAST	RPS7B	190	Saccharomyces cerevisiae (strain ATCC 204508 / S288c)	Small ribosomal subunit protein eS7B	0	0	10	7
sp|P49017|COQ5_YEAST	P49017	COQ5_YEAST	COQ5	307	Saccharomyces cerevisiae (strain ATCC 204508 / S288c)	2-methoxy-6-polyprenyl-1,4-benzoquinol methylase, mitochondrial	0	0	10	22
sp|P50276|MUP1_YEAST	P50276	MUP1_YEAST	MUP1	574	Saccharomyces cerevisiae (strain ATCC 204508 / S288c)	High-affinity methionine permease	0	0	10	13
sp|P53011|SEH1_YEAST	P53011	SEH1_YEAST	SEH1	349	Saccharomyces cerevisiae (strain ATCC 204508 / S288c)	Nucleoporin SEH1	0	0	10	12
sp|P53174|PRM8_YEAST	P53174	PRM8_YEAST	PRM8	237	Saccharomyces cerevisiae (strain ATCC 204508 / S288c)	Pheromone-regulated membrane protein 8	0	0	10	8
sp|Q05359|ERP1_YEAST	Q05359	ERP1_YEAST	ERP1	219	Saccharomyces cerevisiae (strain ATCC 204508 / S288c)	Protein ERP1	0	0	10	10
sp|Q05998|THI7_YEAST	Q05998	THI7_YEAST	THI7	598	Saccharomyces cerevisiae (strain ATCC 204508 / S288c)	Thiamine transporter	0	0	10	13
sp|Q12305|RDL1_YEAST	Q12305	RDL1_YEAST	RDL1	139	Saccharomyces cerevisiae (strain ATCC 204508 / S288c)	Thiosulfate:glutathione sulfurtransferase	0	0	10	21
tr|E9P9G6|E9P9G6_YEASX	E9P9G6	E9P9G6_YEASX	HXT6	570	Saccharomyces cerevisiae	Hexose transporter 6	0	0	10	18
sp|A6ZM93|EIS1_YEAS7	A6ZM93	EIS1_YEAS7	EIS1	843	Saccharomyces cerevisiae (strain YJM789)	Eisosome protein 1	0	0	9	5
sp|A6ZTE8|MGR1_YEAS7	A6ZTE8	MGR1_YEAS7	MGR1	416	Saccharomyces cerevisiae (strain YJM789)	Mitochondrial inner membrane i-AAA protease complex subunit MGR1	0	0	9	17
sp|A7A0F9|MDM10_YEAS7	A7A0F9	MDM10_YEAS7	MDM10	493	Saccharomyces cerevisiae (strain YJM789)	Mitochondrial distribution and morphology protein 10	0	0	9	33
sp|P00163|CYB_YEAST	P00163	CYB_YEAST	COB	385	Saccharomyces cerevisiae (strain ATCC 204508 / S288c)	Cytochrome b	0	0	9	13
sp|P00420|COX3_YEAST	P00420	COX3_YEAST	COX3	269	Saccharomyces cerevisiae (strain ATCC 204508 / S288c)	Cytochrome c oxidase subunit 3	0	0	9	10
sp|P05740|RL17A_YEAST	P05740	RL17A_YEAST	RPL17A	184	Saccharomyces cerevisiae (strain ATCC 204508 / S288c)	Large ribosomal subunit protein uL22A	6	1	9	14
sp|P05748|RL15A_YEAST	P05748	RL15A_YEAST	RPL15A	204	Saccharomyces cerevisiae (strain ATCC 204508 / S288c)	Large ribosomal subunit protein eL15A	16	32	9	7
sp|P07149|FAS1_YEAST	P07149	FAS1_YEAST	FAS1	2051	Saccharomyces cerevisiae (strain ATCC 204508 / S288c)	Fatty acid synthase subunit beta	0	0	9	11
sp|P0CX49|RL18A_YEAST	P0CX49	RL18A_YEAST	RPL18A	186	Saccharomyces cerevisiae (strain ATCC 204508 / S288c)	Large ribosomal subunit protein eL18A	7	11	9	8
sp|P0CX53|RL12A_YEAST	P0CX53	RL12A_YEAST	RPL12A	165	Saccharomyces cerevisiae (strain ATCC 204508 / S288c)	Large ribosomal subunit protein uL11A	0	0	9	13
sp|P18759|SEC18_YEAST	P18759	SEC18_YEAST	SEC18	758	Saccharomyces cerevisiae (strain ATCC 204508 / S288c)	Vesicular-fusion protein SEC18	0	0	9	12
sp|P19516|COX11_YEAST	P19516	COX11_YEAST	COX11	300	Saccharomyces cerevisiae (strain ATCC 204508 / S288c)	Cytochrome c oxidase assembly protein COX11, mitochondrial	0	0	9	13
sp|P26783|RS5_YEAST	P26783	RS5_YEAST	RPS5	225	Saccharomyces cerevisiae (strain ATCC 204508 / S288c)	Small ribosomal subunit protein uS7	1	0	9	8
sp|P32317|AFG1_YEAST	P32317	AFG1_YEAST	AFG1	509	Saccharomyces cerevisiae (strain ATCC 204508 / S288c)	Protein AFG1	0	0	9	18
sp|P32503|GAG_SCVLA	P32503	GAG_SCVLA	gag	680	Saccharomyces cerevisiae virus L-A	Major capsid protein	0	0	9	13
sp|P33327|DHE2_YEAST	P33327	DHE2_YEAST	GDH2	1092	Saccharomyces cerevisiae (strain ATCC 204508 / S288c)	NAD-specific glutamate dehydrogenase	0	0	9	20
sp|P34224|YBF9_YEAST	P34224	YBF9_YEAST	YBL059W	193	Saccharomyces cerevisiae (strain ATCC 204508 / S288c)	Uncharacterized protein YBL059W	0	0	9	15
sp|P35176|CYPD_YEAST	P35176	CYPD_YEAST	CPR5	225	Saccharomyces cerevisiae (strain ATCC 204508 / S288c)	Peptidyl-prolyl cis-trans isomerase D	0	0	9	15
sp|P35206|CSG2_YEAST	P35206	CSG2_YEAST	CSG2	410	Saccharomyces cerevisiae (strain ATCC 204508 / S288c)	Mannosyl phosphorylinositol ceramide synthase regulatory protein CSG2	0	0	9	12
sp|P35723|YET1_YEAST	P35723	YET1_YEAST	YET1	206	Saccharomyces cerevisiae (strain ATCC 204508 / S288c)	Endoplasmic reticulum transmembrane protein 1	0	0	9	9
sp|P35997|RS27A_YEAST	P35997	RS27A_YEAST	RPS27A	82	Saccharomyces cerevisiae (strain ATCC 204508 / S288c)	Small ribosomal subunit protein eS27A	2	2	9	10
sp|P35999|PMIP_YEAST	P35999	PMIP_YEAST	2023-10-01	772	Saccharomyces cerevisiae (strain ATCC 204508 / S288c)	Mitochondrial intermediate peptidase	0	0	9	16
sp|P38071|ETR1_YEAST	P38071	ETR1_YEAST	ETR1	380	Saccharomyces cerevisiae (strain ATCC 204508 / S288c)	Enoyl-[acyl-carrier-protein] reductase, mitochondrial	0	0	9	33
sp|P38428|CUE1_YEAST	P38428	CUE1_YEAST	CUE1	203	Saccharomyces cerevisiae (strain ATCC 204508 / S288c)	Coupling of ubiquitin conjugation to ER degradation protein 1	0	0	9	23
sp|P38731|ARN1_YEAST	P38731	ARN1_YEAST	ARN1	627	Saccharomyces cerevisiae (strain ATCC 204508 / S288c)	Siderophore iron transporter ARN1	0	0	9	8
sp|P39010|AKR1_YEAST	P39010	AKR1_YEAST	AKR1	764	Saccharomyces cerevisiae (strain ATCC 204508 / S288c)	Palmitoyltransferase AKR1	0	0	9	16
sp|P39103|COX14_YEAST	P39103	COX14_YEAST	COX14	70	Saccharomyces cerevisiae (strain ATCC 204508 / S288c)	Cytochrome c oxidase assembly protein COX14	0	0	9	12
sp|P40008|FMP52_YEAST	P40008	FMP52_YEAST	FMP52	231	Saccharomyces cerevisiae (strain ATCC 204508 / S288c)	Protein FMP52, mitochondrial	0	0	9	12
sp|P43561|FET5_YEAST	P43561	FET5_YEAST	FET5	622	Saccharomyces cerevisiae (strain ATCC 204508 / S288c)	Iron transport multicopper oxidase FET5	1	0	9	14
sp|P49095|GCSP_YEAST	P49095	GCSP_YEAST	GCV2	1034	Saccharomyces cerevisiae (strain ATCC 204508 / S288c)	Glycine dehydrogenase (decarboxylating), mitochondrial	0	0	9	23
sp|P49687|NU145_YEAST	P49687	NU145_YEAST	NUP145	1317	Saccharomyces cerevisiae (strain ATCC 204508 / S288c)	Nucleoporin NUP145	3	1	9	16
sp|P53320|MTM1_YEAST	P53320	MTM1_YEAST	MTM1	366	Saccharomyces cerevisiae (strain ATCC 204508 / S288c)	Mitochondrial carrier protein MTM1	0	0	9	8
sp|P53954|ALG11_YEAST	P53954	ALG11_YEAST	ALG11	548	Saccharomyces cerevisiae (strain ATCC 204508 / S288c)	GDP-Man:Man(3)GlcNAc(2)-PP-Dol alpha-1,2-mannosyltransferase	0	0	9	26
sp|Q00402|NUM1_YEAST	Q00402	NUM1_YEAST	NUM1	2748	Saccharomyces cerevisiae (strain ATCC 204508 / S288c)	Nuclear migration protein NUM1	1	0	9	22
sp|Q03707|SRC1_YEAST	Q03707	SRC1_YEAST	SRC1	834	Saccharomyces cerevisiae (strain ATCC 204508 / S288c)	Inner nuclear membrane protein SRC1	0	0	9	18
sp|Q04991|FMP42_YEAST	Q04991	FMP42_YEAST	FMP42	504	Saccharomyces cerevisiae (strain ATCC 204508 / S288c)	Protein FMP42	0	0	9	12
sp|Q05892|COQ11_YEAST	Q05892	COQ11_YEAST	COQ11	277	Saccharomyces cerevisiae (strain ATCC 204508 / S288c)	MIOREX complex component 2	0	0	9	10
sp|Q06089|YP098_YEAST	Q06089	YP098_YEAST	YPR098C	161	Saccharomyces cerevisiae (strain ATCC 204508 / S288c)	Uncharacterized mitochondrial outer membrane protein YPR098C	0	0	9	10
sp|Q06107|YP114_YEAST	Q06107	YP114_YEAST	YPR114W	315	Saccharomyces cerevisiae (strain ATCC 204508 / S288c)	Uncharacterized TLC domain-containing protein YPR114W	0	0	9	17
sp|Q07451|YET3_YEAST	Q07451	YET3_YEAST	YET3	203	Saccharomyces cerevisiae (strain ATCC 204508 / S288c)	Endoplasmic reticulum transmembrane protein 3	0	0	9	23
sp|Q07653|HBT1_YEAST	Q07653	HBT1_YEAST	HBT1	1046	Saccharomyces cerevisiae (strain ATCC 204508 / S288c)	Protein HBT1	0	0	9	15
sp|Q12402|YOP1_YEAST	Q12402	YOP1_YEAST	YOP1	180	Saccharomyces cerevisiae (strain ATCC 204508 / S288c)	Protein YOP1	0	0	9	5
sp|Q12743|DFM1_YEAST	Q12743	DFM1_YEAST	DFM1	341	Saccharomyces cerevisiae (strain ATCC 204508 / S288c)	DER1-like family member protein 1	0	0	9	17
sp|Q12746|PGA3_YEAST	Q12746	PGA3_YEAST	PGA3	312	Saccharomyces cerevisiae (strain ATCC 204508 / S288c)	Plasma membrane-associated coenzyme Q6 reductase PGA3	0	0	9	10
tr|A0A0H3WH99|A0A0H3WH99_YEASX	A0A0H3WH99	A0A0H3WH99_YEASX	rps3	381	Saccharomyces cerevisiae	Ribosomal protein VAR1, mitochondrial	6	3	9	8
tr|C7GU84|C7GU84_YEAS2	C7GU84	C7GU84_YEAS2	C1Q_04014	237	Saccharomyces cerevisiae (strain JAY291)	YMR134W-like protein	0	0	9	7
sp|A6ZXM9|GET3_YEAS7	A6ZXM9	GET3_YEAS7	GET3	354	Saccharomyces cerevisiae (strain YJM789)	ATPase GET3	0	0	8	13
sp|B3LKX3|INA17_YEAS1	B3LKX3	INA17_YEAS1	INA17	182	Saccharomyces cerevisiae (strain RM11-1a)	Inner membrane assembly complex subunit 17	0	0	8	6
sp|P01120|RAS2_YEAST	P01120	RAS2_YEAST	RAS2	322	Saccharomyces cerevisiae (strain ATCC 204508 / S288c)	Ras-like protein 2	0	2	8	13
sp|P02309|H4_YEAST	P02309	H4_YEAST	HHF1	103	Saccharomyces cerevisiae (strain ATCC 204508 / S288c)	Histone H4	5	13	8	7
sp|P02407|RS17A_YEAST	P02407	RS17A_YEAST	RPS17A	136	Saccharomyces cerevisiae (strain ATCC 204508 / S288c)	Small ribosomal subunit protein eS17A	10	12	8	13
sp|P04456|RL25_YEAST	P04456	RL25_YEAST	RPL25	142	Saccharomyces cerevisiae (strain ATCC 204508 / S288c)	Large ribosomal subunit protein uL23	2	0	8	6
sp|P05738|RL9A_YEAST	P05738	RL9A_YEAST	RPL9A	191	Saccharomyces cerevisiae (strain ATCC 204508 / S288c)	Large ribosomal subunit protein uL6A	0	0	8	14
sp|P05755|RS9B_YEAST	P05755	RS9B_YEAST	RPS9B	195	Saccharomyces cerevisiae (strain ATCC 204508 / S288c)	Small ribosomal subunit protein uS4B	0	0	8	5
sp|P0CX45|RL2A_YEAST	P0CX45	RL2A_YEAST	RPL2A	254	Saccharomyces cerevisiae (strain ATCC 204508 / S288c)	Large ribosomal subunit protein uL2A	0	1	8	7
sp|P11655|SEC12_YEAST	P11655	SEC12_YEAST	SEC12	471	Saccharomyces cerevisiae (strain ATCC 204508 / S288c)	Guanine nucleotide-exchange factor SEC12	0	0	8	19
sp|P12385|ERF1_YEAST	P12385	ERF1_YEAST	SUP45	437	Saccharomyces cerevisiae (strain ATCC 204508 / S288c)	Eukaryotic peptide chain release factor subunit 1	0	0	8	9
sp|P17695|GLRX2_YEAST	P17695	GLRX2_YEAST	GRX2	143	Saccharomyces cerevisiae (strain ATCC 204508 / S288c)	Glutaredoxin-2	0	0	8	4
sp|P23500|MRS4_YEAST	P23500	MRS4_YEAST	MRS4	304	Saccharomyces cerevisiae (strain ATCC 204508 / S288c)	Mitochondrial RNA-splicing protein MRS4	0	0	8	9
sp|P25365|SED4_YEAST	P25365	SED4_YEAST	SED4	1065	Saccharomyces cerevisiae (strain ATCC 204508 / S288c)	Putative guanine nucleotide-exchange factor SED4	0	0	8	19
sp|P25374|NFS1_YEAST	P25374	NFS1_YEAST	NFS1	497	Saccharomyces cerevisiae (strain ATCC 204508 / S288c)	Cysteine desulfurase, mitochondrial	0	0	8	19
sp|P25560|RER1_YEAST	P25560	RER1_YEAST	RER1	188	Saccharomyces cerevisiae (strain ATCC 204508 / S288c)	Protein RER1	0	0	8	11
sp|P28321|MGLL_YEAST	P28321	MGLL_YEAST	YJU3	313	Saccharomyces cerevisiae (strain ATCC 204508 / S288c)	Monoglyceride lipase	0	0	8	12
sp|P33891|TIP20_YEAST	P33891	TIP20_YEAST	TIP20	701	Saccharomyces cerevisiae (strain ATCC 204508 / S288c)	Protein transport protein TIP20	0	0	8	10
sp|P36015|YKT6_YEAST	P36015	YKT6_YEAST	YKT6	200	Saccharomyces cerevisiae (strain ATCC 204508 / S288c)	Synaptobrevin homolog YKT6	0	0	8	19
sp|P36090|ANR2_YEAST	P36090	ANR2_YEAST	ANR2	516	Saccharomyces cerevisiae (strain ATCC 204508 / S288c)	Uncharacterized protein ANR2	0	0	8	18
sp|P37296|VPP2_YEAST	P37296	VPP2_YEAST	STV1	890	Saccharomyces cerevisiae (strain ATCC 204508 / S288c)	V-type proton ATPase subunit a, Golgi isoform	0	0	8	15
sp|P38206|RFT1_YEAST	P38206	RFT1_YEAST	RFT1	574	Saccharomyces cerevisiae (strain ATCC 204508 / S288c)	Oligosaccharide translocation protein RFT1	0	0	8	10
sp|P38958|PT100_YEAST	P38958	PT100_YEAST	PET100	111	Saccharomyces cerevisiae (strain ATCC 204508 / S288c)	Protein PET100, mitochondrial	0	0	8	6
sp|P40030|ERG28_YEAST	P40030	ERG28_YEAST	ERG28	148	Saccharomyces cerevisiae (strain ATCC 204508 / S288c)	Ergosterol biosynthetic protein 28	0	0	8	8
sp|P40367|GPI7_YEAST	P40367	GPI7_YEAST	LAS21	830	Saccharomyces cerevisiae (strain ATCC 204508 / S288c)	GPI ethanolamine phosphate transferase 2	0	0	8	13
sp|P40368|NUP82_YEAST	P40368	NUP82_YEAST	NUP82	713	Saccharomyces cerevisiae (strain ATCC 204508 / S288c)	Nucleoporin NUP82	0	0	8	8
sp|P40499|ICE2_YEAST	P40499	ICE2_YEAST	ICE2	491	Saccharomyces cerevisiae (strain ATCC 204508 / S288c)	Protein ICE2	0	0	8	8
sp|P42838|LEM3_YEAST	P42838	LEM3_YEAST	LEM3	414	Saccharomyces cerevisiae (strain ATCC 204508 / S288c)	Phospholipid-transporting ATPase accessory subunit LEM3	0	0	8	5
sp|P46956|PHO86_YEAST	P46956	PHO86_YEAST	PHO86	311	Saccharomyces cerevisiae (strain ATCC 204508 / S288c)	Inorganic phosphate transporter PHO86	0	0	8	16
sp|P47190|PMT3_YEAST	P47190	PMT3_YEAST	PMT3	753	Saccharomyces cerevisiae (strain ATCC 204508 / S288c)	Dolichyl-phosphate-mannose--protein mannosyltransferase 3	0	0	8	8
sp|P48563|MON2_YEAST	P48563	MON2_YEAST	MON2	1636	Saccharomyces cerevisiae (strain ATCC 204508 / S288c)	Protein MON2	0	1	8	15
sp|P53171|GEP7_YEAST	P53171	GEP7_YEAST	GEP7	287	Saccharomyces cerevisiae (strain ATCC 204508 / S288c)	Genetic interactor of prohibitin 7, mitochondrial	0	0	8	6
sp|P53273|YG35_YEAST	P53273	YG35_YEAST	YGR125W	1036	Saccharomyces cerevisiae (strain ATCC 204508 / S288c)	Uncharacterized vacuolar membrane protein YGR125W	0	0	8	28
sp|P53629|ARE2_YEAST	P53629	ARE2_YEAST	ARE2	642	Saccharomyces cerevisiae (strain ATCC 204508 / S288c)	Sterol O-acyltransferase 2	0	0	8	4
sp|P53847|DSL1_YEAST	P53847	DSL1_YEAST	DSL1	754	Saccharomyces cerevisiae (strain ATCC 204508 / S288c)	Protein transport protein DSL1	0	0	8	15
sp|Q01163|RT23_YEAST	Q01163	RT23_YEAST	RSM23	450	Saccharomyces cerevisiae (strain ATCC 204508 / S288c)	Small ribosomal subunit protein mS29	0	0	8	21
sp|Q02773|RPM2_YEAST	Q02773	RPM2_YEAST	RPM2	1202	Saccharomyces cerevisiae (strain ATCC 204508 / S288c)	Ribonuclease P protein component, mitochondrial	0	0	8	25
sp|Q02883|FMP30_YEAST	Q02883	FMP30_YEAST	FMP30	468	Saccharomyces cerevisiae (strain ATCC 204508 / S288c)	N-acyl-phosphatidylethanolamine-hydrolyzing phospholipase D, mitochondrial	0	0	8	7
sp|Q08959|PGC1_YEAST	Q08959	PGC1_YEAST	PGC1	321	Saccharomyces cerevisiae (strain ATCC 204508 / S288c)	Phosphatidylglycerol phospholipase C	0	0	8	11
sp|Q12246|LCB4_YEAST	Q12246	LCB4_YEAST	LCB4	624	Saccharomyces cerevisiae (strain ATCC 204508 / S288c)	Sphingoid long chain base kinase 4	0	0	8	9
sp|Q12462|PEX11_YEAST	Q12462	PEX11_YEAST	PEX11	236	Saccharomyces cerevisiae (strain ATCC 204508 / S288c)	Peroxisomal membrane protein PMP27	0	0	8	15
sp|Q99316|MPD2_YEAST	Q99316	MPD2_YEAST	MPD2	277	Saccharomyces cerevisiae (strain ATCC 204508 / S288c)	Protein disulfide isomerase MPD2	0	0	8	15
sp|A6ZMD0|TVP18_YEAS7	A6ZMD0	TVP18_YEAS7	TVP18	167	Saccharomyces cerevisiae (strain YJM789)	Golgi apparatus membrane protein TVP18	0	0	7	8
sp|A6ZTA1|NVJ1_YEAS7	A6ZTA1	NVJ1_YEAS7	NVJ1	321	Saccharomyces cerevisiae (strain YJM789)	Nucleus-vacuole junction protein 1	0	0	7	22
sp|P00360|G3P1_YEAST	P00360	G3P1_YEAST	TDH1	332	Saccharomyces cerevisiae (strain ATCC 204508 / S288c)	Glyceraldehyde-3-phosphate dehydrogenase 1	0	0	7	17
sp|P04449|RL24A_YEAST	P04449	RL24A_YEAST	RPL24A	155	Saccharomyces cerevisiae (strain ATCC 204508 / S288c)	Large ribosomal subunit protein eL24A	12	18	7	5
sp|P04710|ADT1_YEAST	P04710	ADT1_YEAST	AAC1	309	Saccharomyces cerevisiae (strain ATCC 204508 / S288c)	ADP,ATP carrier protein 1	0	0	7	13
sp|P07806|SYV_YEAST	P07806	SYV_YEAST	VAS1	1104	Saccharomyces cerevisiae (strain ATCC 204508 / S288c)	Valine--tRNA ligase, mitochondrial	0	0	7	29
sp|P0C5R9|RNK_YEAST	P0C5R9	RNK_YEAST	YPR170W-B	85	Saccharomyces cerevisiae (strain ATCC 204508 / S288c)	V-type proton ATPase subunit f	0	0	7	9
sp|P10566|MRS3_YEAST	P10566	MRS3_YEAST	MRS3	314	Saccharomyces cerevisiae (strain ATCC 204508 / S288c)	Mitochondrial RNA-splicing protein MRS3	0	0	7	12
sp|P10592|HSP72_YEAST	P10592	HSP72_YEAST	SSA2	639	Saccharomyces cerevisiae (strain ATCC 204508 / S288c)	Heat shock protein SSA2	0	0	7	8
sp|P12686|RT13_YEAST	P12686	RT13_YEAST	MRP13	339	Saccharomyces cerevisiae (strain ATCC 204508 / S288c)	Small ribosomal subunit protein mS44	0	0	7	19
sp|P17076|RL8A_YEAST	P17076	RL8A_YEAST	RPL8A	256	Saccharomyces cerevisiae (strain ATCC 204508 / S288c)	Large ribosomal subunit protein eL8A	2	3	7	13
sp|P22140|EPT1_YEAST	P22140	EPT1_YEAST	EPT1	391	Saccharomyces cerevisiae (strain ATCC 204508 / S288c)	Choline/ethanolaminephosphotransferase 1	0	0	7	5
sp|P32476|ERG1_YEAST	P32476	ERG1_YEAST	ERG1	496	Saccharomyces cerevisiae (strain ATCC 204508 / S288c)	Squalene epoxidase ERG1	0	0	7	18
sp|P32527|ZUO1_YEAST	P32527	ZUO1_YEAST	ZUO1	433	Saccharomyces cerevisiae (strain ATCC 204508 / S288c)	Zuotin	0	0	7	10
sp|P32589|HSP7F_YEAST	P32589	HSP7F_YEAST	SSE1	693	Saccharomyces cerevisiae (strain ATCC 204508 / S288c)	Heat shock protein homolog SSE1	0	0	7	11
sp|P33754|SEC66_YEAST	P33754	SEC66_YEAST	SEC66	206	Saccharomyces cerevisiae (strain ATCC 204508 / S288c)	Translocation protein SEC66	0	0	7	10
sp|P34222|PTH2_YEAST	P34222	PTH2_YEAST	PTH2	208	Saccharomyces cerevisiae (strain ATCC 204508 / S288c)	Peptidyl-tRNA hydrolase 2	0	0	7	12
sp|P35179|SC61G_YEAST	P35179	SC61G_YEAST	SSS1	80	Saccharomyces cerevisiae (strain ATCC 204508 / S288c)	Protein transport protein SSS1	1	1	7	6
sp|P35180|TOM20_YEAST	P35180	TOM20_YEAST	TOM20	183	Saccharomyces cerevisiae (strain ATCC 204508 / S288c)	Mitochondrial import receptor subunit TOM20	0	0	7	14
sp|P35183|AST1_YEAST	P35183	AST1_YEAST	AST1	429	Saccharomyces cerevisiae (strain ATCC 204508 / S288c)	Protein AST1	0	0	7	5
sp|P37292|GLYM_YEAST	P37292	GLYM_YEAST	SHM1	490	Saccharomyces cerevisiae (strain ATCC 204508 / S288c)	Serine hydroxymethyltransferase, mitochondrial	0	0	7	13
sp|P38736|GOSR1_YEAST	P38736	GOSR1_YEAST	GOS1	223	Saccharomyces cerevisiae (strain ATCC 204508 / S288c)	Golgi SNAP receptor complex member 1	0	0	7	11
sp|P38817|GGA2_YEAST	P38817	GGA2_YEAST	GGA2	585	Saccharomyces cerevisiae (strain ATCC 204508 / S288c)	ADP-ribosylation factor-binding protein GGA2	0	0	7	8
sp|P39540|ELO1_YEAST	P39540	ELO1_YEAST	ELO1	310	Saccharomyces cerevisiae (strain ATCC 204508 / S288c)	Elongation of fatty acids protein 1	0	0	7	6
sp|P39962|KC13_YEAST	P39962	KC13_YEAST	YCK3	524	Saccharomyces cerevisiae (strain ATCC 204508 / S288c)	Casein kinase I homolog 3	0	0	7	17
sp|P40074|AVT6_YEAST	P40074	AVT6_YEAST	AVT6	448	Saccharomyces cerevisiae (strain ATCC 204508 / S288c)	Vacuolar amino acid transporter 6	0	0	7	5
sp|P40098|FMP10_YEAST	P40098	FMP10_YEAST	FMP10	244	Saccharomyces cerevisiae (strain ATCC 204508 / S288c)	Uncharacterized mitochondrial membrane protein FMP10	0	0	7	9
sp|P40159|YNU8_YEAST	P40159	YNU8_YEAST	YNL208W	199	Saccharomyces cerevisiae (strain ATCC 204508 / S288c)	Uncharacterized protein YNL208W	0	0	7	7
sp|P40959|MVP1_YEAST	P40959	MVP1_YEAST	MVP1	511	Saccharomyces cerevisiae (strain ATCC 204508 / S288c)	Sorting nexin MVP1	0	0	7	17
sp|P40961|PHB1_YEAST	P40961	PHB1_YEAST	PHB1	287	Saccharomyces cerevisiae (strain ATCC 204508 / S288c)	Prohibitin-1	0	0	7	11
sp|P46982|MNN5_YEAST	P46982	MNN5_YEAST	MNN5	586	Saccharomyces cerevisiae (strain ATCC 204508 / S288c)	Alpha-1,2-mannosyltransferase MNN5	0	0	7	12
sp|P48558|BXI1_YEAST	P48558	BXI1_YEAST	BXI1	297	Saccharomyces cerevisiae (strain ATCC 204508 / S288c)	Bax inhibitor 1	0	0	7	11
sp|P53073|EMC4_YEAST	P53073	EMC4_YEAST	EMC4	190	Saccharomyces cerevisiae (strain ATCC 204508 / S288c)	ER membrane protein complex subunit 4	0	0	7	8
sp|P53120|YGO0_YEAST	P53120	YGO0_YEAST	YGL140C	1219	Saccharomyces cerevisiae (strain ATCC 204508 / S288c)	Uncharacterized membrane protein YGL140C	0	0	7	5
sp|P53217|YG1I_YEAST	P53217	YG1I_YEAST	YGR026W	278	Saccharomyces cerevisiae (strain ATCC 204508 / S288c)	Uncharacterized membrane protein YGR026W	0	0	7	7
sp|P53264|CLD1_YEAST	P53264	CLD1_YEAST	CLD1	445	Saccharomyces cerevisiae (strain ATCC 204508 / S288c)	Cardiolipin-specific deacylase 1, mitochondrial	0	0	7	6
sp|P53318|COQ6_YEAST	P53318	COQ6_YEAST	COQ6	479	Saccharomyces cerevisiae (strain ATCC 204508 / S288c)	Ubiquinone biosynthesis monooxygenase COQ6, mitochondrial	0	0	7	18
sp|P53622|COPA_YEAST	P53622	COPA_YEAST	COP1	1201	Saccharomyces cerevisiae (strain ATCC 204508 / S288c)	Coatomer subunit alpha	2	1	7	6
sp|P53889|FMP41_YEAST	P53889	FMP41_YEAST	FMP41	259	Saccharomyces cerevisiae (strain ATCC 204508 / S288c)	Uncharacterized mitochondrial hydrolase FMP41	0	0	7	8
sp|Q00873|CYT2_YEAST	Q00873	CYT2_YEAST	CYT2	224	Saccharomyces cerevisiae (strain ATCC 204508 / S288c)	Holocytochrome-c1 synthase	0	0	7	13
sp|Q01217|ARG56_YEAST	Q01217	ARG56_YEAST	ARG5,6	863	Saccharomyces cerevisiae (strain ATCC 204508 / S288c)	Protein ARG5,6, mitochondrial	0	0	7	10
sp|Q01855|RS15_YEAST	Q01855	RS15_YEAST	RPS15	142	Saccharomyces cerevisiae (strain ATCC 204508 / S288c)	Small ribosomal subunit protein uS19	0	0	7	6
sp|Q03714|USA1_YEAST	Q03714	USA1_YEAST	USA1	838	Saccharomyces cerevisiae (strain ATCC 204508 / S288c)	U1 SNP1-associating protein 1	0	0	7	11
sp|Q03778|RIFK_YEAST	Q03778	RIFK_YEAST	FMN1	218	Saccharomyces cerevisiae (strain ATCC 204508 / S288c)	Riboflavin kinase	0	0	7	16
sp|Q06247|YL173_YEAST	Q06247	YL173_YEAST	YLR173W	608	Saccharomyces cerevisiae (strain ATCC 204508 / S288c)	Putative uncharacterized protein YLR173W	0	0	7	4
sp|Q07824|TPO1_YEAST	Q07824	TPO1_YEAST	TPO1	586	Saccharomyces cerevisiae (strain ATCC 204508 / S288c)	Polyamine transporter 1	0	0	7	10
sp|Q08299|ENB1_YEAST	Q08299	ENB1_YEAST	ENB1	606	Saccharomyces cerevisiae (strain ATCC 204508 / S288c)	Siderophore iron transporter ENB1	0	0	7	7
sp|Q12251|YP011_YEAST	Q12251	YP011_YEAST	YPR011C	326	Saccharomyces cerevisiae (strain ATCC 204508 / S288c)	Uncharacterized mitochondrial carrier YPR011C	0	0	7	13
sp|Q12324|YVC1_YEAST	Q12324	YVC1_YEAST	YVC1	675	Saccharomyces cerevisiae (strain ATCC 204508 / S288c)	Calcium channel YVC1	0	0	7	11
sp|A6ZM02|RS3A2_YEAS7	A6ZM02	RS3A2_YEAS7	RPS1B	255	Saccharomyces cerevisiae (strain YJM789)	Small ribosomal subunit protein eS1B	0	2	6	8
sp|A6ZR39|GET2_YEAS7	A6ZR39	GET2_YEAS7	GET2	285	Saccharomyces cerevisiae (strain YJM789)	Golgi to ER traffic protein 2	0	0	6	2
sp|A6ZTA4|AIM18_YEAS7	A6ZTA4	AIM18_YEAS7	AIM18	321	Saccharomyces cerevisiae (strain YJM789)	Altered inheritance of mitochondria protein 18, mitochondrial	0	0	6	8
sp|A6ZXG9|DHH1_YEAS7	A6ZXG9	DHH1_YEAS7	DHH1	506	Saccharomyces cerevisiae (strain YJM789)	ATP-dependent RNA helicase DHH1	0	0	6	7
sp|A6ZZS6|PTM1_YEAS7	A6ZZS6	PTM1_YEAS7	PTM1	523	Saccharomyces cerevisiae (strain YJM789)	Membrane protein PTM1	0	0	6	4
sp|B5VRJ9|AIM39_YEAS6	B5VRJ9	AIM39_YEAS6	AIM39	395	Saccharomyces cerevisiae (strain AWRI1631)	Altered inheritance of mitochondria protein 39, mitochondrial	0	0	6	17
sp|P00854|ATP6_YEAST	P00854	ATP6_YEAST	ATP6	259	Saccharomyces cerevisiae (strain ATCC 204508 / S288c)	ATP synthase subunit a	0	0	6	16
sp|P09950|HEM1_YEAST	P09950	HEM1_YEAST	HEM1	548	Saccharomyces cerevisiae (strain ATCC 204508 / S288c)	5-aminolevulinate synthase, mitochondrial	0	0	6	19
sp|P0C2H8|RL31A_YEAST	P0C2H8	RL31A_YEAST	RPL31A	113	Saccharomyces cerevisiae (strain ATCC 204508 / S288c)	Large ribosomal subunit protein eL31A	0	0	6	9
sp|P10174|COX7_YEAST	P10174	COX7_YEAST	COX7	60	Saccharomyces cerevisiae (strain ATCC 204508 / S288c)	Cytochrome c oxidase subunit 7, mitochondrial	0	0	6	5
sp|P12688|YPK1_YEAST	P12688	YPK1_YEAST	YPK1	680	Saccharomyces cerevisiae (strain ATCC 204508 / S288c)	Serine/threonine-protein kinase YPK1	0	0	6	11
sp|P18496|ATP10_YEAST	P18496	ATP10_YEAST	ATP10	279	Saccharomyces cerevisiae (strain ATCC 204508 / S288c)	Mitochondrial ATPase complex subunit ATP10	0	0	6	10
sp|P19955|RT31_YEAST	P19955	RT31_YEAST	YMR31	123	Saccharomyces cerevisiae (strain ATCC 204508 / S288c)	37S ribosomal protein YMR-31, mitochondrial	0	0	6	7
sp|P21560|CBP3_YEAST	P21560	CBP3_YEAST	CBP3	335	Saccharomyces cerevisiae (strain ATCC 204508 / S288c)	Protein CBP3, mitochondrial	0	0	6	17
sp|P23291|KC11_YEAST	P23291	KC11_YEAST	YCK1	538	Saccharomyces cerevisiae (strain ATCC 204508 / S288c)	Casein kinase I homolog 1	0	0	6	13
sp|P32500|NDC1_YEAST	P32500	NDC1_YEAST	NDC1	655	Saccharomyces cerevisiae (strain ATCC 204508 / S288c)	Nucleoporin NDC1	0	0	6	7
sp|P33338|SLA2_YEAST	P33338	SLA2_YEAST	SLA2	968	Saccharomyces cerevisiae (strain ATCC 204508 / S288c)	Protein SLA2	0	0	6	3
sp|P34730|BMH2_YEAST	P34730	BMH2_YEAST	BMH2	273	Saccharomyces cerevisiae (strain ATCC 204508 / S288c)	Protein BMH2	0	0	6	2
sp|P35169|TOR1_YEAST	P35169	TOR1_YEAST	TOR1	2470	Saccharomyces cerevisiae (strain ATCC 204508 / S288c)	Serine/threonine-protein kinase TOR1	0	0	6	18
sp|P36521|RM11_YEAST	P36521	RM11_YEAST	MRPL11	249	Saccharomyces cerevisiae (strain ATCC 204508 / S288c)	Large ribosomal subunit protein uL10m	0	0	6	10
sp|P36523|RM15_YEAST	P36523	RM15_YEAST	MRPL15	253	Saccharomyces cerevisiae (strain ATCC 204508 / S288c)	Large ribosomal subunit protein mL57	0	0	6	7
sp|P38138|GLU2A_YEAST	P38138	GLU2A_YEAST	ROT2	954	Saccharomyces cerevisiae (strain ATCC 204508 / S288c)	Glucosidase 2 subunit alpha	0	0	6	18
sp|P38139|LDH1_YEAST	P38139	LDH1_YEAST	LDH1	375	Saccharomyces cerevisiae (strain ATCC 204508 / S288c)	Lipid droplet hydrolase 1	0	0	6	10
sp|P38172|MRX3_YEAST	P38172	MRX3_YEAST	MRX3	270	Saccharomyces cerevisiae (strain ATCC 204508 / S288c)	MIOREX complex component 3	0	0	6	12
sp|P38256|YBU6_YEAST	P38256	YBU6_YEAST	YBR096W	230	Saccharomyces cerevisiae (strain ATCC 204508 / S288c)	Probable thioesterase YBR096W	0	0	6	8
sp|P38297|FZO1_YEAST	P38297	FZO1_YEAST	FZO1	855	Saccharomyces cerevisiae (strain ATCC 204508 / S288c)	Mitofusin FZO1	0	0	6	13
sp|P38300|MBA1_YEAST	P38300	MBA1_YEAST	MBA1	278	Saccharomyces cerevisiae (strain ATCC 204508 / S288c)	Inner membrane mitoribosome receptor MBA1, mitochondrial	0	0	6	14
sp|P38355|YB8B_YEAST	P38355	YB8B_YEAST	YBR287W	427	Saccharomyces cerevisiae (strain ATCC 204508 / S288c)	Uncharacterized transporter YBR287W	0	0	6	8
sp|P38770|BRL1_YEAST	P38770	BRL1_YEAST	BRL1	471	Saccharomyces cerevisiae (strain ATCC 204508 / S288c)	Nucleus export protein BRL1	0	0	6	4
sp|P38878|LNP_YEAST	P38878	LNP_YEAST	LNP1	278	Saccharomyces cerevisiae (strain ATCC 204508 / S288c)	Endoplasmic reticulum junction formation protein lunapark	0	0	6	21
sp|P39524|ATC3_YEAST	P39524	ATC3_YEAST	DRS2	1355	Saccharomyces cerevisiae (strain ATCC 204508 / S288c)	Phospholipid-transporting ATPase DRS2	0	0	6	23
sp|P40582|GST1_YEAST	P40582	GST1_YEAST	GTT1	234	Saccharomyces cerevisiae (strain ATCC 204508 / S288c)	Glutathione S-transferase 1	0	0	6	6
sp|P47084|MRX12_YEAST	P47084	MRX12_YEAST	MRX12	519	Saccharomyces cerevisiae (strain ATCC 204508 / S288c)	MIOREX complex component 12	0	0	6	12
sp|P47140|AIM25_YEAST	P47140	AIM25_YEAST	AIM25	327	Saccharomyces cerevisiae (strain ATCC 204508 / S288c)	Altered inheritance rate of mitochondria protein 25	0	0	6	5
sp|P47155|ILM1_YEAST	P47155	ILM1_YEAST	ILM1	203	Saccharomyces cerevisiae (strain ATCC 204508 / S288c)	Protein ILM1	0	0	6	12
sp|P48236|GPC1_YEAST	P48236	GPC1_YEAST	GPC1	432	Saccharomyces cerevisiae (strain ATCC 204508 / S288c)	Glycerophosphocholine acyltransferase 1	0	0	6	7
sp|P48439|OST3_YEAST	P48439	OST3_YEAST	OST3	350	Saccharomyces cerevisiae (strain ATCC 204508 / S288c)	Dolichyl-diphosphooligosaccharide--protein glycosyltransferase subunit 3	0	0	6	16
sp|P48589|RS12_YEAST	P48589	RS12_YEAST	RPS12	143	Saccharomyces cerevisiae (strain ATCC 204508 / S288c)	Small ribosomal subunit protein eS12	0	0	6	9
sp|P52891|NUP84_YEAST	P52891	NUP84_YEAST	NUP84	726	Saccharomyces cerevisiae (strain ATCC 204508 / S288c)	Nucleoporin NUP84	0	0	6	17
sp|P53228|TAL2_YEAST	P53228	TAL2_YEAST	NQM1	333	Saccharomyces cerevisiae (strain ATCC 204508 / S288c)	Transaldolase NQM1	0	0	6	10
sp|P53311|MPC3_YEAST	P53311	MPC3_YEAST	MPC3	146	Saccharomyces cerevisiae (strain ATCC 204508 / S288c)	Mitochondrial pyruvate carrier 3	0	0	6	5
sp|P53875|RM19_YEAST	P53875	RM19_YEAST	MRPL19	158	Saccharomyces cerevisiae (strain ATCC 204508 / S288c)	Large ribosomal subunit protein uL11m	0	0	6	5
sp|Q00764|TPS1_YEAST	Q00764	TPS1_YEAST	TPS1	495	Saccharomyces cerevisiae (strain ATCC 204508 / S288c)	Alpha,alpha-trehalose-phosphate synthase [UDP-forming] 56 kDa subunit	0	0	6	11
sp|Q01574|ACS1_YEAST	Q01574	ACS1_YEAST	ACS1	713	Saccharomyces cerevisiae (strain ATCC 204508 / S288c)	Acetyl-coenzyme A synthetase 1	0	0	6	19
sp|Q02199|NUP49_YEAST	Q02199	NUP49_YEAST	NUP49	472	Saccharomyces cerevisiae (strain ATCC 204508 / S288c)	Nucleoporin NUP49/NSP49	0	0	6	9
sp|Q02795|OSTD_YEAST	Q02795	OSTD_YEAST	SWP1	286	Saccharomyces cerevisiae (strain ATCC 204508 / S288c)	Dolichyl-diphosphooligosaccharide--protein glycosyltransferase subunit SWP1	0	0	6	3
sp|Q02863|UBP16_YEAST	Q02863	UBP16_YEAST	UBP16	499	Saccharomyces cerevisiae (strain ATCC 204508 / S288c)	Ubiquitin carboxyl-terminal hydrolase 16	0	0	6	12
sp|Q03529|SCS7_YEAST	Q03529	SCS7_YEAST	SCS7	384	Saccharomyces cerevisiae (strain ATCC 204508 / S288c)	Ceramide very long chain fatty acid hydroxylase SCS7	0	0	6	12
sp|Q06538|CSC1_YEAST	Q06538	CSC1_YEAST	CSC1	782	Saccharomyces cerevisiae (strain ATCC 204508 / S288c)	Calcium permeable stress-gated cation channel 1	0	0	6	7
sp|Q06644|PMT7_YEAST	Q06644	PMT7_YEAST	PMT7	662	Saccharomyces cerevisiae (strain ATCC 204508 / S288c)	Probable dolichyl-phosphate-mannose--protein mannosyltransferase 7	0	0	6	12
sp|Q07830|GPI13_YEAST	Q07830	GPI13_YEAST	GPI13	1017	Saccharomyces cerevisiae (strain ATCC 204508 / S288c)	GPI ethanolamine phosphate transferase 3	0	0	6	12
sp|Q08227|INP54_YEAST	Q08227	INP54_YEAST	INP54	384	Saccharomyces cerevisiae (strain ATCC 204508 / S288c)	Phosphatidylinositol 4,5-bisphosphate 5-phosphatase INP54	0	0	6	15
sp|Q12289|CRC1_YEAST	Q12289	CRC1_YEAST	CRC1	327	Saccharomyces cerevisiae (strain ATCC 204508 / S288c)	Mitochondrial carnitine carrier	0	0	6	8
sp|Q12349|ATP14_YEAST	Q12349	ATP14_YEAST	ATP14	124	Saccharomyces cerevisiae (strain ATCC 204508 / S288c)	ATP synthase subunit H, mitochondrial	0	0	6	7
sp|Q12412|PNS1_YEAST	Q12412	PNS1_YEAST	PNS1	539	Saccharomyces cerevisiae (strain ATCC 204508 / S288c)	Protein PNS1	0	0	6	10
sp|Q3E7B6|VA0E_YEAST	Q3E7B6	VA0E_YEAST	VMA9	73	Saccharomyces cerevisiae (strain ATCC 204508 / S288c)	V-type proton ATPase subunit e	0	0	6	7
tr|C8ZFH1|C8ZFH1_YEAS8	C8ZFH1	C8ZFH1_YEAS8	EC1118_1M3_5182g	348	Saccharomyces cerevisiae (strain Lalvin	Adh2p	0	0	6	6
sp|A6ZP43|MCA1_YEAS7	A6ZP43	MCA1_YEAS7	MCA1	432	Saccharomyces cerevisiae (strain YJM789)	Metacaspase-1	1	3	5	1
sp|A6ZUX3|GET1_YEAS7	A6ZUX3	GET1_YEAS7	GET1	235	Saccharomyces cerevisiae (strain YJM789)	Golgi to ER traffic protein 1	0	0	5	6
sp|A6ZVU2|SEC11_YEAS7	A6ZVU2	SEC11_YEAS7	SEC11	167	Saccharomyces cerevisiae (strain YJM789)	Signal peptidase complex catalytic subunit SEC11	0	0	5	8
sp|A6ZY50|TVP23_YEAS7	A6ZY50	TVP23_YEAS7	TVP23	199	Saccharomyces cerevisiae (strain YJM789)	Golgi apparatus membrane protein TVP23	0	0	5	9
sp|A7A1V9|RM04_YEAS7	A7A1V9	RM04_YEAS7	MRPL4	319	Saccharomyces cerevisiae (strain YJM789)	Large ribosomal subunit protein uL29m	0	0	5	13
sp|P04806|HXKA_YEAST	P04806	HXKA_YEAST	HXK1	485	Saccharomyces cerevisiae (strain ATCC 204508 / S288c)	Hexokinase-1	0	0	5	11
sp|P05375|PLMT_YEAST	P05375	PLMT_YEAST	OPI3	206	Saccharomyces cerevisiae (strain ATCC 204508 / S288c)	Phosphatidyl-N-methylethanolamine N-methyltransferase	0	0	5	11
sp|P05453|ERF3_YEAST	P05453	ERF3_YEAST	SUP35	685	Saccharomyces cerevisiae (strain ATCC 204508 / S288c)	Eukaryotic peptide chain release factor GTP-binding subunit	0	0	5	7
sp|P09368|PUT1_YEAST	P09368	PUT1_YEAST	PUT1	476	Saccharomyces cerevisiae (strain ATCC 204508 / S288c)	Proline dehydrogenase, mitochondrial	0	0	5	11
sp|P0C0W1|RS22A_YEAST	P0C0W1	RS22A_YEAST	RPS22A	130	Saccharomyces cerevisiae (strain ATCC 204508 / S288c)	Small ribosomal subunit protein uS8A	0	0	5	6
sp|P0CX25|RL43A_YEAST	P0CX25	RL43A_YEAST	RPL43A	92	Saccharomyces cerevisiae (strain ATCC 204508 / S288c)	Large ribosomal subunit protein eL43A	3	7	5	5
sp|P0CX29|RS23A_YEAST	P0CX29	RS23A_YEAST	RPS23A	145	Saccharomyces cerevisiae (strain ATCC 204508 / S288c)	Small ribosomal subunit protein uS12A	8	20	5	6
sp|P0CX31|RS24A_YEAST	P0CX31	RS24A_YEAST	RPS24A	135	Saccharomyces cerevisiae (strain ATCC 204508 / S288c)	Small ribosomal subunit protein eS24A	0	0	5	7
sp|P10963|PCKA_YEAST	P10963	PCKA_YEAST	PCK1	549	Saccharomyces cerevisiae (strain ATCC 204508 / S288c)	Phosphoenolpyruvate carboxykinase (ATP)	0	0	5	21
sp|P15380|PUT4_YEAST	P15380	PUT4_YEAST	PUT4	627	Saccharomyces cerevisiae (strain ATCC 204508 / S288c)	Proline-specific permease	0	0	5	4
sp|P16661|ALG1_YEAST	P16661	ALG1_YEAST	ALG1	449	Saccharomyces cerevisiae (strain ATCC 204508 / S288c)	Chitobiosyldiphosphodolichol beta-mannosyltransferase	0	0	5	11
sp|P21306|ATP5E_YEAST	P21306	ATP5E_YEAST	ATP15	62	Saccharomyces cerevisiae (strain ATCC 204508 / S288c)	ATP synthase subunit epsilon, mitochondrial	0	0	5	7
sp|P22213|SLY1_YEAST	P22213	SLY1_YEAST	SLY1	666	Saccharomyces cerevisiae (strain ATCC 204508 / S288c)	Protein SLY1	0	0	5	19
sp|P25294|SIS1_YEAST	P25294	SIS1_YEAST	SIS1	352	Saccharomyces cerevisiae (strain ATCC 204508 / S288c)	Protein SIS1	0	0	5	6
sp|P25568|ATG22_YEAST	P25568	ATG22_YEAST	ATG22	528	Saccharomyces cerevisiae (strain ATCC 204508 / S288c)	Autophagy-related protein 22	0	0	5	8
sp|P27680|COQ3_YEAST	P27680	COQ3_YEAST	COQ3	312	Saccharomyces cerevisiae (strain ATCC 204508 / S288c)	Ubiquinone biosynthesis O-methyltransferase, mitochondrial	0	0	5	7
sp|P27810|KTR1_YEAST	P27810	KTR1_YEAST	KTR1	393	Saccharomyces cerevisiae (strain ATCC 204508 / S288c)	Alpha-1,2 mannosyltransferase KTR1	0	0	5	9
sp|P28817|HIBCH_YEAST	P28817	HIBCH_YEAST	EHD3	500	Saccharomyces cerevisiae (strain ATCC 204508 / S288c)	Small ribosomal subunit protein mS47	0	0	5	13
sp|P32453|ATP11_YEAST	P32453	ATP11_YEAST	ATP11	318	Saccharomyces cerevisiae (strain ATCC 204508 / S288c)	Protein ATP11, mitochondrial	0	0	5	10
sp|P32564|SCM4_YEAST	P32564	SCM4_YEAST	SCM4	187	Saccharomyces cerevisiae (strain ATCC 204508 / S288c)	Protein SCM4	0	0	5	5
sp|P32611|RML2_YEAST	P32611	RML2_YEAST	RML2	393	Saccharomyces cerevisiae (strain ATCC 204508 / S288c)	Large ribosomal subunit protein uL2m	6	7	5	5
sp|P32621|GDA1_YEAST	P32621	GDA1_YEAST	GDA1	518	Saccharomyces cerevisiae (strain ATCC 204508 / S288c)	Guanosine-diphosphatase	0	0	5	9
sp|P32836|GSP2_YEAST	P32836	GSP2_YEAST	GSP2	220	Saccharomyces cerevisiae (strain ATCC 204508 / S288c)	GTP-binding nuclear protein GSP2/CNR2	0	0	5	3
sp|P32842|VATL2_YEAST	P32842	VATL2_YEAST	VMA11	164	Saccharomyces cerevisiae (strain ATCC 204508 / S288c)	V-type proton ATPase subunit c'	0	0	5	13
sp|P33328|SNC2_YEAST	P33328	SNC2_YEAST	SNC2	115	Saccharomyces cerevisiae (strain ATCC 204508 / S288c)	Synaptobrevin homolog 2	0	0	5	4
sp|P36046|MIA40_YEAST	P36046	MIA40_YEAST	MIA40	403	Saccharomyces cerevisiae (strain ATCC 204508 / S288c)	Mitochondrial intermembrane space import and assembly protein 40	0	0	5	6
sp|P36057|SRPB_YEAST	P36057	SRPB_YEAST	SRP102	244	Saccharomyces cerevisiae (strain ATCC 204508 / S288c)	Signal recognition particle receptor subunit beta	0	0	5	7
sp|P36528|RM17_YEAST	P36528	RM17_YEAST	MRPL17	281	Saccharomyces cerevisiae (strain ATCC 204508 / S288c)	Large ribosomal subunit protein mL46	0	0	5	8
sp|P36534|RM40_YEAST	P36534	RM40_YEAST	MRPL40	297	Saccharomyces cerevisiae (strain ATCC 204508 / S288c)	Large ribosomal subunit protein uL24m	0	0	5	10
sp|P38072|SCO2_YEAST	P38072	SCO2_YEAST	SCO2	301	Saccharomyces cerevisiae (strain ATCC 204508 / S288c)	Protein SCO2, mitochondrial	0	0	5	6
sp|P38323|CLPX_YEAST	P38323	CLPX_YEAST	MCX1	520	Saccharomyces cerevisiae (strain ATCC 204508 / S288c)	ATP-dependent clpX-like chaperone, mitochondrial	0	0	5	13
sp|P38812|GEP4_YEAST	P38812	GEP4_YEAST	GEP4	185	Saccharomyces cerevisiae (strain ATCC 204508 / S288c)	Phosphatidylglycerophosphatase GEP4, mitochondrial	0	0	5	9
sp|P38934|BFR1_YEAST	P38934	BFR1_YEAST	BFR1	470	Saccharomyces cerevisiae (strain ATCC 204508 / S288c)	Nuclear segregation protein BFR1	0	0	5	3
sp|P40509|COPE_YEAST	P40509	COPE_YEAST	SEC28	296	Saccharomyces cerevisiae (strain ATCC 204508 / S288c)	Coatomer subunit epsilon	8	20	5	7
sp|P40533|TED1_YEAST	P40533	TED1_YEAST	TED1	473	Saccharomyces cerevisiae (strain ATCC 204508 / S288c)	Protein TED1	0	0	5	15
sp|P41930|SSU1_YEAST	P41930	SSU1_YEAST	SSU1	458	Saccharomyces cerevisiae (strain ATCC 204508 / S288c)	Sulfite efflux pump SSU1	0	0	5	8
sp|P43560|LAM5_YEAST	P43560	LAM5_YEAST	LAM5	674	Saccharomyces cerevisiae (strain ATCC 204508 / S288c)	Membrane-anchored lipid-binding protein LAM5	0	0	5	4
sp|P53134|YGL4_YEAST	P53134	YGL4_YEAST	YGL114W	725	Saccharomyces cerevisiae (strain ATCC 204508 / S288c)	Putative oligopeptide transporter YGL114W	0	0	5	10
sp|P53170|PDK2_YEAST	P53170	PDK2_YEAST	PKP2	491	Saccharomyces cerevisiae (strain ATCC 204508 / S288c)	[Pyruvate dehydrogenase (acetyl-transferring)] kinase 2, mitochondrial	0	0	5	18
sp|P53203|PEX31_YEAST	P53203	PEX31_YEAST	PEX31	462	Saccharomyces cerevisiae (strain ATCC 204508 / S288c)	Peroxisomal membrane protein PEX31	0	0	5	6
sp|P53881|RM22_YEAST	P53881	RM22_YEAST	MRPL22	309	Saccharomyces cerevisiae (strain ATCC 204508 / S288c)	Large ribosomal subunit protein uL22m	0	0	5	7
sp|Q02774|SHR3_YEAST	Q02774	SHR3_YEAST	SHR3	210	Saccharomyces cerevisiae (strain ATCC 204508 / S288c)	Secretory component protein SHR3	0	0	5	11
sp|Q04491|SEC13_YEAST	Q04491	SEC13_YEAST	SEC13	297	Saccharomyces cerevisiae (strain ATCC 204508 / S288c)	Protein transport protein SEC13	0	0	5	15
sp|Q05521|DPP1_YEAST	Q05521	DPP1_YEAST	DPP1	289	Saccharomyces cerevisiae (strain ATCC 204508 / S288c)	Diacylglycerol pyrophosphate phosphatase 1	0	0	5	7
sp|Q05779|COQ9_YEAST	Q05779	COQ9_YEAST	COQ9	260	Saccharomyces cerevisiae (strain ATCC 204508 / S288c)	Ubiquinone biosynthesis protein COQ9, mitochondrial	0	0	5	4
sp|Q06159|ATG39_YEAST	Q06159	ATG39_YEAST	ATG39	398	Saccharomyces cerevisiae (strain ATCC 204508 / S288c)	Autophagy-related protein 39	0	0	5	6
sp|Q06668|OMS1_YEAST	Q06668	OMS1_YEAST	OMS1	471	Saccharomyces cerevisiae (strain ATCC 204508 / S288c)	Methyltransferase OMS1, mitochondrial	0	0	5	5
sp|Q12106|MCP1_YEAST	Q12106	MCP1_YEAST	MCP1	302	Saccharomyces cerevisiae (strain ATCC 204508 / S288c)	Mitochondrial adapter protein MCP1	0	0	5	8
sp|Q12301|YD180_YEAST	Q12301	YD180_YEAST	YDL180W	547	Saccharomyces cerevisiae (strain ATCC 204508 / S288c)	Uncharacterized membrane protein YDL180W	0	0	5	10
sp|Q12407|YD199_YEAST	Q12407	YD199_YEAST	YDL199C	687	Saccharomyces cerevisiae (strain ATCC 204508 / S288c)	Putative metabolite transport protein YDL199C	0	0	5	11
sp|Q99297|ODC2_YEAST	Q99297	ODC2_YEAST	ODC2	307	Saccharomyces cerevisiae (strain ATCC 204508 / S288c)	Mitochondrial 2-oxodicarboxylate carrier 2	0	0	5	16
tr|A0A8H4BY05|A0A8H4BY05_YEASX	A0A8H4BY05	A0A8H4BY05_YEASX	PFK2	959	Saccharomyces cerevisiae	ATP-dependent 6-phosphofructokinase	0	0	5	9
sp|A6ZKY8|TCM62_YEAS7	A6ZKY8	TCM62_YEAS7	TCM62	572	Saccharomyces cerevisiae (strain YJM789)	Mitochondrial chaperone TCM62	0	0	4	4
sp|A6ZL18|PFF1_YEAS7	A6ZL18	PFF1_YEAS7	SCY_0288	976	Saccharomyces cerevisiae (strain YJM789)	Vacuolar membrane protease	0	0	4	7
sp|A6ZQF6|ATG27_YEAS7	A6ZQF6	ATG27_YEAS7	ATG27	271	Saccharomyces cerevisiae (strain YJM789)	Autophagy-related protein 27	0	0	4	4
sp|A6ZQI5|SFH5_YEAS7	A6ZQI5	SFH5_YEAS7	SFH5	294	Saccharomyces cerevisiae (strain YJM789)	Phosphatidylinositol transfer protein SFH5	0	0	4	7
sp|A6ZQM4|RRF2M_YEAS7	A6ZQM4	RRF2M_YEAS7	MEF2	819	Saccharomyces cerevisiae (strain YJM789)	Ribosome-releasing factor 2, mitochondrial	0	0	4	13
sp|A6ZRK4|BLH1_YEAS7	A6ZRK4	BLH1_YEAS7	LAP3	483	Saccharomyces cerevisiae (strain YJM789)	Cysteine proteinase 1, mitochondrial	0	0	4	7
sp|A6ZRW6|MLS1_YEAS7	A6ZRW6	MLS1_YEAS7	MLS1	554	Saccharomyces cerevisiae (strain YJM789)	Malate synthase 1	0	0	4	2
sp|A6ZUC0|SDS23_YEAS7	A6ZUC0	SDS23_YEAS7	SDS23	527	Saccharomyces cerevisiae (strain YJM789)	Protein SDS23	0	0	4	9
sp|A6ZXL1|S2538_YEAS7	A6ZXL1	S2538_YEAS7	SCY_0799	307	Saccharomyces cerevisiae (strain YJM789)	Mitochondrial glycine transporter	0	0	4	13
sp|O14455|RL36B_YEAST	O14455	RL36B_YEAST	RPL36B	100	Saccharomyces cerevisiae (strain ATCC 204508 / S288c)	Large ribosomal subunit protein eL36B	13	14	4	3
sp|P07266|MRS1_YEAST	P07266	MRS1_YEAST	MRS1	363	Saccharomyces cerevisiae (strain ATCC 204508 / S288c)	Mitochondrial RNA-splicing protein MRS1	0	0	4	7
sp|P0C2H6|RL27A_YEAST	P0C2H6	RL27A_YEAST	RPL27A	136	Saccharomyces cerevisiae (strain ATCC 204508 / S288c)	Large ribosomal subunit protein eL27A	1	0	4	8
sp|P10507|MPPB_YEAST	P10507	MPPB_YEAST	MAS1	462	Saccharomyces cerevisiae (strain ATCC 204508 / S288c)	Mitochondrial-processing peptidase subunit beta	0	0	4	6
sp|P10659|METK1_YEAST	P10659	METK1_YEAST	SAM1	382	Saccharomyces cerevisiae (strain ATCC 204508 / S288c)	S-adenosylmethionine synthase 1	0	0	4	1
sp|P11491|PPB_YEAST	P11491	PPB_YEAST	PHO8	566	Saccharomyces cerevisiae (strain ATCC 204508 / S288c)	Repressible alkaline phosphatase	0	0	4	13
sp|P12687|RM02_YEAST	P12687	RM02_YEAST	MRP7	371	Saccharomyces cerevisiae (strain ATCC 204508 / S288c)	Large ribosomal subunit protein bL27m	0	0	4	8
sp|P13711|ACOX_YEAST	P13711	ACOX_YEAST	POX1	748	Saccharomyces cerevisiae (strain ATCC 204508 / S288c)	Acyl-coenzyme A oxidase	0	0	4	3
sp|P21965|MCK1_YEAST	P21965	MCK1_YEAST	MCK1	375	Saccharomyces cerevisiae (strain ATCC 204508 / S288c)	Protein kinase MCK1	0	0	4	16
sp|P25303|SCJ1_YEAST	P25303	SCJ1_YEAST	SCJ1	377	Saccharomyces cerevisiae (strain ATCC 204508 / S288c)	DnaJ-related protein SCJ1	0	0	4	6
sp|P25343|RV161_YEAST	P25343	RV161_YEAST	RVS161	265	Saccharomyces cerevisiae (strain ATCC 204508 / S288c)	Reduced viability upon starvation protein 161	0	0	4	4
sp|P25348|RM32_YEAST	P25348	RM32_YEAST	MRPL32	183	Saccharomyces cerevisiae (strain ATCC 204508 / S288c)	Large ribosomal subunit protein bL32m	0	0	4	2
sp|P25613|ADY2_YEAST	P25613	ADY2_YEAST	ADY2	283	Saccharomyces cerevisiae (strain ATCC 204508 / S288c)	Accumulation of dyads protein 2	0	0	4	6
sp|P27809|KRE2_YEAST	P27809	KRE2_YEAST	KRE2	442	Saccharomyces cerevisiae (strain ATCC 204508 / S288c)	Glycolipid 2-alpha-mannosyltransferase	0	0	4	6
sp|P31383|2AAA_YEAST	P31383	2AAA_YEAST	TPD3	635	Saccharomyces cerevisiae (strain ATCC 204508 / S288c)	Protein phosphatase PP2A regulatory subunit A	0	0	4	14
sp|P32378|COQ2_YEAST	P32378	COQ2_YEAST	COQ2	372	Saccharomyces cerevisiae (strain ATCC 204508 / S288c)	4-hydroxybenzoate polyprenyltransferase, mitochondrial	0	0	4	9
sp|P32449|AROG_YEAST	P32449	AROG_YEAST	ARO4	370	Saccharomyces cerevisiae (strain ATCC 204508 / S288c)	Phospho-2-dehydro-3-deoxyheptonate aldolase, tyrosine-inhibited	0	0	4	1
sp|P32474|EUG1_YEAST	P32474	EUG1_YEAST	EUG1	517	Saccharomyces cerevisiae (strain ATCC 204508 / S288c)	Protein disulfide-isomerase EUG1	0	0	4	4
sp|P32499|NUP2_YEAST	P32499	NUP2_YEAST	NUP2	720	Saccharomyces cerevisiae (strain ATCC 204508 / S288c)	Nucleoporin NUP2	2	6	4	5
sp|P32521|PAN1_YEAST	P32521	PAN1_YEAST	PAN1	1480	Saccharomyces cerevisiae (strain ATCC 204508 / S288c)	Actin cytoskeleton-regulatory complex protein PAN1	0	0	4	6
sp|P32904|RM06_YEAST	P32904	RM06_YEAST	MRPL6	214	Saccharomyces cerevisiae (strain ATCC 204508 / S288c)	Large ribosomal subunit protein uL6m	0	0	4	5
sp|P36018|YPT52_YEAST	P36018	YPT52_YEAST	YPT52	234	Saccharomyces cerevisiae (strain ATCC 204508 / S288c)	GTP-binding protein YPT52	0	0	4	5
sp|P36141|FMP46_YEAST	P36141	FMP46_YEAST	FMP46	133	Saccharomyces cerevisiae (strain ATCC 204508 / S288c)	Putative redox protein FMP46, mitochondrial	0	0	4	8
sp|P38146|YPT10_YEAST	P38146	YPT10_YEAST	YPT10	199	Saccharomyces cerevisiae (strain ATCC 204508 / S288c)	GTP-binding protein YPT10	0	0	4	7
sp|P38247|SLM4_YEAST	P38247	SLM4_YEAST	SLM4	162	Saccharomyces cerevisiae (strain ATCC 204508 / S288c)	Protein SLM4	0	0	4	7
sp|P38427|TSL1_YEAST	P38427	TSL1_YEAST	TSL1	1098	Saccharomyces cerevisiae (strain ATCC 204508 / S288c)	Trehalose synthase complex regulatory subunit TSL1	2	2	4	4
sp|P38724|ARN2_YEAST	P38724	ARN2_YEAST	ARN2	620	Saccharomyces cerevisiae (strain ATCC 204508 / S288c)	Siderophore iron transporter ARN2	0	0	4	3
sp|P38755|OSH7_YEAST	P38755	OSH7_YEAST	OSH7	437	Saccharomyces cerevisiae (strain ATCC 204508 / S288c)	Oxysterol-binding protein homolog 7	0	0	4	5
sp|P39938|RS26A_YEAST	P39938	RS26A_YEAST	RPS26A	119	Saccharomyces cerevisiae (strain ATCC 204508 / S288c)	Small ribosomal subunit protein eS26A	4	7	4	4
sp|P40474|QDR2_YEAST	P40474	QDR2_YEAST	QDR2	542	Saccharomyces cerevisiae (strain ATCC 204508 / S288c)	Quinidine resistance protein 2	0	0	4	2
sp|P40540|EMC5_YEAST	P40540	EMC5_YEAST	EMC5	141	Saccharomyces cerevisiae (strain ATCC 204508 / S288c)	ER membrane protein complex subunit 5	0	0	4	5
sp|P42940|ETFB_YEAST	P42940	ETFB_YEAST	CIR1	261	Saccharomyces cerevisiae (strain ATCC 204508 / S288c)	Probable electron transfer flavoprotein subunit beta	0	0	4	4
sp|P42949|TIM16_YEAST	P42949	TIM16_YEAST	PAM16	149	Saccharomyces cerevisiae (strain ATCC 204508 / S288c)	Mitochondrial import inner membrane translocase subunit TIM16	0	0	4	8
sp|P43611|OSW7_YEAST	P43611	OSW7_YEAST	OSW7	510	Saccharomyces cerevisiae (strain ATCC 204508 / S288c)	Outer spore wall protein 7	0	0	4	19
sp|P46673|NUP85_YEAST	P46673	NUP85_YEAST	NUP85	744	Saccharomyces cerevisiae (strain ATCC 204508 / S288c)	Nucleoporin NUP85	0	0	4	13
sp|P48569|YD183_YEAST	P48569	YD183_YEAST	YDL183C	320	Saccharomyces cerevisiae (strain ATCC 204508 / S288c)	Uncharacterized protein YDL183C	0	0	4	5
sp|P48837|NUP57_YEAST	P48837	NUP57_YEAST	NUP57	541	Saccharomyces cerevisiae (strain ATCC 204508 / S288c)	Nucleoporin NUP57	0	0	4	8
sp|P51996|YPT32_YEAST	P51996	YPT32_YEAST	YPT32	222	Saccharomyces cerevisiae (strain ATCC 204508 / S288c)	GTP-binding protein YPT32/YPT11	0	0	4	11
sp|P53173|ERV14_YEAST	P53173	ERV14_YEAST	ERV14	138	Saccharomyces cerevisiae (strain ATCC 204508 / S288c)	ER-derived vesicles protein ERV14	0	0	4	5
sp|P53184|PNC1_YEAST	P53184	PNC1_YEAST	PNC1	216	Saccharomyces cerevisiae (strain ATCC 204508 / S288c)	Nicotinamidase	0	0	4	8
sp|P53224|ORM1_YEAST	P53224	ORM1_YEAST	ORM1	222	Saccharomyces cerevisiae (strain ATCC 204508 / S288c)	Protein ORM1	0	0	4	13
sp|P53241|VHT1_YEAST	P53241	VHT1_YEAST	VHT1	593	Saccharomyces cerevisiae (strain ATCC 204508 / S288c)	Vitamin H transporter	0	0	4	4
sp|P53278|YG3A_YEAST	P53278	YG3A_YEAST	YGR130C	816	Saccharomyces cerevisiae (strain ATCC 204508 / S288c)	Uncharacterized protein YGR130C	0	0	4	8
sp|P53326|YG5L_YEAST	P53326	YG5L_YEAST	YGR266W	701	Saccharomyces cerevisiae (strain ATCC 204508 / S288c)	Uncharacterized protein YGR266W	0	0	4	20
sp|P53584|YTP1_YEAST	P53584	YTP1_YEAST	YTP1	459	Saccharomyces cerevisiae (strain ATCC 204508 / S288c)	Protein YTP1	0	0	4	1
sp|P53845|YIF1_YEAST	P53845	YIF1_YEAST	YIF1	314	Saccharomyces cerevisiae (strain ATCC 204508 / S288c)	Protein transport protein YIF1	0	0	4	7
sp|P53918|ESBP6_YEAST	P53918	ESBP6_YEAST	ESBP6	673	Saccharomyces cerevisiae (strain ATCC 204508 / S288c)	Uncharacterized transporter ESBP6	0	0	4	7
sp|Q01662|MAP1_YEAST	Q01662	MAP1_YEAST	MAP1	387	Saccharomyces cerevisiae (strain ATCC 204508 / S288c)	Methionine aminopeptidase 1	0	0	4	4
sp|Q02486|ABF2_YEAST	Q02486	ABF2_YEAST	ABF2	183	Saccharomyces cerevisiae (strain ATCC 204508 / S288c)	ARS-binding factor 2, mitochondrial	0	0	4	7
sp|Q02889|MGR2_YEAST	Q02889	MGR2_YEAST	MGR2	113	Saccharomyces cerevisiae (strain ATCC 204508 / S288c)	Protein MGR2	0	0	4	6
sp|Q02969|PEX25_YEAST	Q02969	PEX25_YEAST	PEX25	394	Saccharomyces cerevisiae (strain ATCC 204508 / S288c)	Peroxisomal membrane protein PEX25	0	0	4	8
sp|Q03103|ERO1_YEAST	Q03103	ERO1_YEAST	ERO1	563	Saccharomyces cerevisiae (strain ATCC 204508 / S288c)	Endoplasmic oxidoreductin-1	0	0	4	8
sp|Q03430|RSM28_YEAST	Q03430	RSM28_YEAST	RSM28	361	Saccharomyces cerevisiae (strain ATCC 204508 / S288c)	Small ribosomal subunit protein mS46	0	0	4	4
sp|Q03648|YM59_YEAST	Q03648	YM59_YEAST	YMR209C	457	Saccharomyces cerevisiae (strain ATCC 204508 / S288c)	Uncharacterized protein YMR209C	0	0	4	4
sp|Q03823|YM35_YEAST	Q03823	YM35_YEAST	YMR160W	816	Saccharomyces cerevisiae (strain ATCC 204508 / S288c)	Uncharacterized protein YMR160W	0	0	4	8
sp|Q05166|NUP59_YEAST	Q05166	NUP59_YEAST	ASM4	528	Saccharomyces cerevisiae (strain ATCC 204508 / S288c)	Nucleoporin ASM4	0	0	4	8
sp|Q06179|FMP27_YEAST	Q06179	FMP27_YEAST	FMP27	2628	Saccharomyces cerevisiae (strain ATCC 204508 / S288c)	Protein FMP27, mitochondrial	0	0	4	13
sp|Q06328|YPQ2_YEAST	Q06328	YPQ2_YEAST	YPQ2	317	Saccharomyces cerevisiae (strain ATCC 204508 / S288c)	Probable vacuolar amino acid transporter YPQ2	0	0	4	5
sp|Q06991|PUN1_YEAST	Q06991	PUN1_YEAST	PUN1	263	Saccharomyces cerevisiae (strain ATCC 204508 / S288c)	Protein PUN1	0	0	4	4
sp|Q08960|TYW1_YEAST	Q08960	TYW1_YEAST	TYW1	810	Saccharomyces cerevisiae (strain ATCC 204508 / S288c)	S-adenosyl-L-methionine-dependent tRNA 4-demethylwyosine synthase	0	0	4	12
sp|Q12160|YP063_YEAST	Q12160	YP063_YEAST	YPR063C	140	Saccharomyces cerevisiae (strain ATCC 204508 / S288c)	Uncharacterized protein YPR063C	0	0	4	4
sp|Q12229|UBX3_YEAST	Q12229	UBX3_YEAST	UBX3	455	Saccharomyces cerevisiae (strain ATCC 204508 / S288c)	UBX domain-containing protein 3	0	0	4	3
sp|Q12235|YCT1_YEAST	Q12235	YCT1_YEAST	YCT1	531	Saccharomyces cerevisiae (strain ATCC 204508 / S288c)	High affinity cysteine transporter	0	0	4	7
sp|Q12252|PHM7_YEAST	Q12252	PHM7_YEAST	PHM7	991	Saccharomyces cerevisiae (strain ATCC 204508 / S288c)	Phosphate metabolism protein 7	0	0	4	10
sp|Q12328|TIM22_YEAST	Q12328	TIM22_YEAST	TIM22	207	Saccharomyces cerevisiae (strain ATCC 204508 / S288c)	Mitochondrial import inner membrane translocase subunit TIM22	0	0	4	4
sp|Q12335|PST2_YEAST	Q12335	PST2_YEAST	PST2	198	Saccharomyces cerevisiae (strain ATCC 204508 / S288c)	Protoplast secreted protein 2	0	0	4	11
sp|Q12372|MMP1_YEAST	Q12372	MMP1_YEAST	MMP1	583	Saccharomyces cerevisiae (strain ATCC 204508 / S288c)	S-methylmethionine permease 1	0	0	4	9
sp|Q12445|POM34_YEAST	Q12445	POM34_YEAST	POM34	299	Saccharomyces cerevisiae (strain ATCC 204508 / S288c)	Nucleoporin POM34	0	0	4	7
sp|A6ZQU6|IRC22_YEAS7	A6ZQU6	IRC22_YEAS7	IRC22	225	Saccharomyces cerevisiae (strain YJM789)	Increased recombination centers protein 22	0	0	3	3
sp|A6ZR21|RGI1_YEAS7	A6ZR21	RGI1_YEAS7	RGI1	161	Saccharomyces cerevisiae (strain YJM789)	Respiratory growth induced protein 1	0	0	3	2
sp|A6ZUI6|CBP4_YEAS7	A6ZUI6	CBP4_YEAS7	CBP4	147	Saccharomyces cerevisiae (strain YJM789)	Assembly factor CBP4	0	0	3	2
sp|A6ZW78|GPI3_YEAS7	A6ZW78	GPI3_YEAS7	SPT14	452	Saccharomyces cerevisiae (strain YJM789)	Phosphatidylinositol N-acetylglucosaminyltransferase GPI3 subunit	0	0	3	2
sp|A6ZYG1|COQ4_YEAS7	A6ZYG1	COQ4_YEAS7	COQ4	335	Saccharomyces cerevisiae (strain YJM789)	Ubiquinone biosynthesis protein COQ4, mitochondrial	0	0	3	4
sp|P02293|H2B1_YEAST	P02293	H2B1_YEAST	HTB1	131	Saccharomyces cerevisiae (strain ATCC 204508 / S288c)	Histone H2B.1	3	0	3	5
sp|P04911|H2A1_YEAST	P04911	H2A1_YEAST	HTA1	132	Saccharomyces cerevisiae (strain ATCC 204508 / S288c)	Histone H2A.1	2	5	3	0
sp|P06787|CALM_YEAST	P06787	CALM_YEAST	CMD1	147	Saccharomyces cerevisiae (strain ATCC 204508 / S288c)	Calmodulin	0	0	3	0
sp|P07991|OAT_YEAST	P07991	OAT_YEAST	CAR2	424	Saccharomyces cerevisiae (strain ATCC 204508 / S288c)	Ornithine aminotransferase	0	0	3	6
sp|P08679|CISY2_YEAST	P08679	CISY2_YEAST	CIT2	460	Saccharomyces cerevisiae (strain ATCC 204508 / S288c)	Citrate synthase, peroxisomal	0	0	3	12
sp|P09232|PRTB_YEAST	P09232	PRTB_YEAST	PRB1	635	Saccharomyces cerevisiae (strain ATCC 204508 / S288c)	Cerevisin	0	0	3	2
sp|P17064|FCY2_YEAST	P17064	FCY2_YEAST	FCY2	533	Saccharomyces cerevisiae (strain ATCC 204508 / S288c)	Purine-cytosine permease FCY2	0	0	3	7
sp|P17898|CPT1_YEAST	P17898	CPT1_YEAST	CPT1	393	Saccharomyces cerevisiae (strain ATCC 204508 / S288c)	Cholinephosphotransferase 1	0	0	3	6
sp|P19146|ARF2_YEAST	P19146	ARF2_YEAST	ARF2	181	Saccharomyces cerevisiae (strain ATCC 204508 / S288c)	ADP-ribosylation factor 2	0	0	3	4
sp|P22135|ATP12_YEAST	P22135	ATP12_YEAST	ATP12	325	Saccharomyces cerevisiae (strain ATCC 204508 / S288c)	Protein ATP12, mitochondrial	0	0	3	5
sp|P22147|XRN1_YEAST	P22147	XRN1_YEAST	XRN1	1528	Saccharomyces cerevisiae (strain ATCC 204508 / S288c)	5'-3' exoribonuclease 1	0	0	3	5
sp|P22215|SLY41_YEAST	P22215	SLY41_YEAST	SLY41	453	Saccharomyces cerevisiae (strain ATCC 204508 / S288c)	Uncharacterized transporter SLY41	0	0	3	3
sp|P22353|RM08_YEAST	P22353	RM08_YEAST	MRPL8	238	Saccharomyces cerevisiae (strain ATCC 204508 / S288c)	Large ribosomal subunit protein bL17m	0	0	3	11
sp|P22543|VPS34_YEAST	P22543	VPS34_YEAST	VPS34	875	Saccharomyces cerevisiae (strain ATCC 204508 / S288c)	Phosphatidylinositol 3-kinase VPS34	0	0	3	7
sp|P23833|SCO1_YEAST	P23833	SCO1_YEAST	SCO1	295	Saccharomyces cerevisiae (strain ATCC 204508 / S288c)	Protein SCO1, mitochondrial	0	0	3	15
sp|P25351|YCR3_YEAST	P25351	YCR3_YEAST	YCR023C	611	Saccharomyces cerevisiae (strain ATCC 204508 / S288c)	Uncharacterized membrane protein YCR023C	0	0	3	9
sp|P26785|RL16B_YEAST	P26785	RL16B_YEAST	RPL16B	198	Saccharomyces cerevisiae (strain ATCC 204508 / S288c)	Large ribosomal subunit protein uL13B	0	1	3	2
sp|P27697|COQ8_YEAST	P27697	COQ8_YEAST	COQ8	501	Saccharomyces cerevisiae (strain ATCC 204508 / S288c)	Atypical kinase COQ8, mitochondrial	0	0	3	10
sp|P28239|IPYR2_YEAST	P28239	IPYR2_YEAST	PPA2	310	Saccharomyces cerevisiae (strain ATCC 204508 / S288c)	Inorganic pyrophosphatase, mitochondrial	0	0	3	7
sp|P32352|ERG2_YEAST	P32352	ERG2_YEAST	ERG2	222	Saccharomyces cerevisiae (strain ATCC 204508 / S288c)	C-8 sterol isomerase ERG2	0	0	3	4
sp|P32462|ERG24_YEAST	P32462	ERG24_YEAST	ERG24	438	Saccharomyces cerevisiae (strain ATCC 204508 / S288c)	Delta(14)-sterol reductase ERG24	0	0	3	9
sp|P32463|ACPM_YEAST	P32463	ACPM_YEAST	ACP1	125	Saccharomyces cerevisiae (strain ATCC 204508 / S288c)	Acyl carrier protein, mitochondrial	0	0	3	3
sp|P32566|SMI1_YEAST	P32566	SMI1_YEAST	SMI1	505	Saccharomyces cerevisiae (strain ATCC 204508 / S288c)	Cell wall assembly regulator SMI1	0	0	3	5
sp|P32598|PP12_YEAST	P32598	PP12_YEAST	GLC7	312	Saccharomyces cerevisiae (strain ATCC 204508 / S288c)	Serine/threonine-protein phosphatase PP1-2	0	0	3	10
sp|P32784|GPT1_YEAST	P32784	GPT1_YEAST	SCT1	759	Saccharomyces cerevisiae (strain ATCC 204508 / S288c)	Glycerol-3-phosphate O-acyltransferase 1	0	0	3	5
sp|P33302|PDR5_YEAST	P33302	PDR5_YEAST	PDR5	1511	Saccharomyces cerevisiae (strain ATCC 204508 / S288c)	Pleiotropic ABC efflux transporter of multiple drugs	0	0	3	16
sp|P34163|TGL1_YEAST	P34163	TGL1_YEAST	TGL1	548	Saccharomyces cerevisiae (strain ATCC 204508 / S288c)	Sterol esterase TGL1	0	0	3	13
sp|P34231|YKS7_YEAST	P34231	YKS7_YEAST	YKL187C	750	Saccharomyces cerevisiae (strain ATCC 204508 / S288c)	Uncharacterized protein YKL187C	0	0	3	11
sp|P34240|ZRT3_YEAST	P34240	ZRT3_YEAST	ZRT3	503	Saccharomyces cerevisiae (strain ATCC 204508 / S288c)	Zinc-regulated transporter 3	0	0	3	8
sp|P35724|MNR2_YEAST	P35724	MNR2_YEAST	MNR2	969	Saccharomyces cerevisiae (strain ATCC 204508 / S288c)	Manganese resistance protein MNR2	0	0	3	8
sp|P35996|RM38_YEAST	P35996	RM38_YEAST	MRPL38	138	Saccharomyces cerevisiae (strain ATCC 204508 / S288c)	Large ribosomal subunit protein uL14m	0	0	3	7
sp|P36034|COS9_YEAST	P36034	COS9_YEAST	COS9	407	Saccharomyces cerevisiae (strain ATCC 204508 / S288c)	Protein COS9	0	0	3	4
sp|P36516|RM03_YEAST	P36516	RM03_YEAST	MRPL3	390	Saccharomyces cerevisiae (strain ATCC 204508 / S288c)	Large ribosomal subunit protein mL44	0	0	3	15
sp|P36519|RM07_YEAST	P36519	RM07_YEAST	MRPL7	292	Saccharomyces cerevisiae (strain ATCC 204508 / S288c)	Large ribosomal subunit protein uL5m	0	0	3	6
sp|P37297|STT4_YEAST	P37297	STT4_YEAST	STT4	1900	Saccharomyces cerevisiae (strain ATCC 204508 / S288c)	Phosphatidylinositol 4-kinase STT4	0	0	3	3
sp|P38061|RL32_YEAST	P38061	RL32_YEAST	RPL32	130	Saccharomyces cerevisiae (strain ATCC 204508 / S288c)	Large ribosomal subunit protein eL32	0	10	3	6
sp|P38142|YB91_YEAST	P38142	YB91_YEAST	YBR241C	488	Saccharomyces cerevisiae (strain ATCC 204508 / S288c)	Probable metabolite transport protein YBR241C	0	0	3	13
sp|P38226|CST26_YEAST	P38226	CST26_YEAST	CST26	397	Saccharomyces cerevisiae (strain ATCC 204508 / S288c)	2-acyl-1-lysophosphatidylinositol acyltransferase	0	0	3	8
sp|P38249|EIF3A_YEAST	P38249	EIF3A_YEAST	RPG1	964	Saccharomyces cerevisiae (strain ATCC 204508 / S288c)	Eukaryotic translation initiation factor 3 subunit A	0	0	3	3
sp|P38329|VHC1_YEAST	P38329	VHC1_YEAST	VHC1	1120	Saccharomyces cerevisiae (strain ATCC 204508 / S288c)	Vacuolar cation-chloride cotransporter 1	0	0	3	6
sp|P38604|ERG7_YEAST	P38604	ERG7_YEAST	ERG7	731	Saccharomyces cerevisiae (strain ATCC 204508 / S288c)	Lanosterol synthase ERG7	0	0	3	4
sp|P38788|SSZ1_YEAST	P38788	SSZ1_YEAST	SSZ1	538	Saccharomyces cerevisiae (strain ATCC 204508 / S288c)	Ribosome-associated complex subunit SSZ1	0	0	3	8
sp|P38797|PP2C7_YEAST	P38797	PP2C7_YEAST	PTC7	343	Saccharomyces cerevisiae (strain ATCC 204508 / S288c)	Protein phosphatase 2C homolog 7, mitochondrial	0	0	3	9
sp|P38869|SVP26_YEAST	P38869	SVP26_YEAST	SVP26	228	Saccharomyces cerevisiae (strain ATCC 204508 / S288c)	Protein SVP26	0	0	3	6
sp|P38875|GPI16_YEAST	P38875	GPI16_YEAST	GPI16	610	Saccharomyces cerevisiae (strain ATCC 204508 / S288c)	GPI transamidase component GPI16	0	0	3	13
sp|P38921|PET8_YEAST	P38921	PET8_YEAST	PET8	284	Saccharomyces cerevisiae (strain ATCC 204508 / S288c)	Putative mitochondrial carrier protein PET8	0	0	3	5
sp|P38998|LYS1_YEAST	P38998	LYS1_YEAST	LYS1	373	Saccharomyces cerevisiae (strain ATCC 204508 / S288c)	Saccharopine dehydrogenase [NAD(+), L-lysine-forming]	0	0	3	7
sp|P39107|MNN9_YEAST	P39107	MNN9_YEAST	MNN9	395	Saccharomyces cerevisiae (strain ATCC 204508 / S288c)	Mannan polymerase complexes subunit MNN9	0	0	3	8
sp|P39518|LCF2_YEAST	P39518	LCF2_YEAST	FAA2	744	Saccharomyces cerevisiae (strain ATCC 204508 / S288c)	Long-chain-fatty-acid--CoA ligase 2	0	0	3	15
sp|P40015|ISC1_YEAST	P40015	ISC1_YEAST	ISC1	477	Saccharomyces cerevisiae (strain ATCC 204508 / S288c)	Inositol phosphosphingolipids phospholipase C	1	0	3	9
sp|P40046|VTC1_YEAST	P40046	VTC1_YEAST	VTC1	129	Saccharomyces cerevisiae (strain ATCC 204508 / S288c)	Vacuolar transporter chaperone complex subunit 1	0	0	3	2
sp|P41318|LST8_YEAST	P41318	LST8_YEAST	LST8	303	Saccharomyces cerevisiae (strain ATCC 204508 / S288c)	Target of rapamycin complex subunit LST8	0	0	3	4
sp|P41733|CDC91_YEAST	P41733	CDC91_YEAST	GAB1	394	Saccharomyces cerevisiae (strain ATCC 204508 / S288c)	GPI transamidase component GAB1	0	0	3	2
sp|P41903|PTE1_YEAST	P41903	PTE1_YEAST	TES1	349	Saccharomyces cerevisiae (strain ATCC 204508 / S288c)	Peroxisomal acyl-coenzyme A thioester hydrolase 1	0	0	3	1
sp|P42836|PFA3_YEAST	P42836	PFA3_YEAST	PFA3	336	Saccharomyces cerevisiae (strain ATCC 204508 / S288c)	Palmitoyltransferase PFA3	0	0	3	2
sp|P46964|OST2_YEAST	P46964	OST2_YEAST	OST2	130	Saccharomyces cerevisiae (strain ATCC 204508 / S288c)	Dolichyl-diphosphooligosaccharide--protein glycosyltransferase subunit OST2	0	0	3	3
sp|P46972|IMP2_YEAST	P46972	IMP2_YEAST	IMP2	177	Saccharomyces cerevisiae (strain ATCC 204508 / S288c)	Mitochondrial inner membrane protease subunit 2	0	0	3	4
sp|P47013|DS1P1_YEAST	P47013	DS1P1_YEAST	LCB3	409	Saccharomyces cerevisiae (strain ATCC 204508 / S288c)	Dihydrosphingosine 1-phosphate phosphatase LCB3	0	0	3	6
sp|P47052|SDHX_YEAST	P47052	SDHX_YEAST	YJL045W	634	Saccharomyces cerevisiae (strain ATCC 204508 / S288c)	Succinate dehydrogenase [ubiquinone] flavoprotein subunit 2, mitochondrial	0	0	3	7
sp|P47131|YJ55_YEAST	P47131	YJ55_YEAST	YJR085C	105	Saccharomyces cerevisiae (strain ATCC 204508 / S288c)	TMEM14 protein homolog YJR085C	0	0	3	7
sp|P48527|SYYM_YEAST	P48527	SYYM_YEAST	MSY1	492	Saccharomyces cerevisiae (strain ATCC 204508 / S288c)	Tyrosine--tRNA ligase, mitochondrial	0	0	3	12
sp|P48813|GNP1_YEAST	P48813	GNP1_YEAST	GNP1	663	Saccharomyces cerevisiae (strain ATCC 204508 / S288c)	High-affinity glutamine permease	0	0	3	11
sp|P49018|GPI8_YEAST	P49018	GPI8_YEAST	GPI8	411	Saccharomyces cerevisiae (strain ATCC 204508 / S288c)	GPI-anchor transamidase	0	0	3	8
sp|P52870|SC6B1_YEAST	P52870	SC6B1_YEAST	SBH1	82	Saccharomyces cerevisiae (strain ATCC 204508 / S288c)	Protein transport protein SBH1	0	0	3	2
sp|P53093|YIP4_YEAST	P53093	YIP4_YEAST	YIP4	235	Saccharomyces cerevisiae (strain ATCC 204508 / S288c)	Protein YIP4	0	0	3	3
sp|P53191|PIB2_YEAST	P53191	PIB2_YEAST	PIB2	635	Saccharomyces cerevisiae (strain ATCC 204508 / S288c)	Glutamine sensor PIB2	0	0	3	8
sp|P53388|DIP5_YEAST	P53388	DIP5_YEAST	DIP5	608	Saccharomyces cerevisiae (strain ATCC 204508 / S288c)	Dicarboxylic amino acid permease	0	0	3	4
sp|P56508|SNA2_YEAST	P56508	SNA2_YEAST	SNA2	79	Saccharomyces cerevisiae (strain ATCC 204508 / S288c)	Protein SNA2	1	0	3	5
sp|P57744|TIM8_YEAST	P57744	TIM8_YEAST	TIM8	87	Saccharomyces cerevisiae (strain ATCC 204508 / S288c)	Mitochondrial import inner membrane translocase subunit TIM8	0	0	3	2
sp|P81450|ATP18_YEAST	P81450	ATP18_YEAST	ATP18	59	Saccharomyces cerevisiae (strain ATCC 204508 / S288c)	ATP synthase subunit J, mitochondrial	0	0	3	2
sp|Q01477|UBP3_YEAST	Q01477	UBP3_YEAST	UBP3	912	Saccharomyces cerevisiae (strain ATCC 204508 / S288c)	Ubiquitin carboxyl-terminal hydrolase 3	0	0	3	3
sp|Q01519|COX12_YEAST	Q01519	COX12_YEAST	COX12	83	Saccharomyces cerevisiae (strain ATCC 204508 / S288c)	Cytochrome c oxidase subunit 12, mitochondrial	0	0	3	2
sp|Q02629|NU100_YEAST	Q02629	NU100_YEAST	NUP100	959	Saccharomyces cerevisiae (strain ATCC 204508 / S288c)	Nucleoporin NUP100/NSP100	0	0	3	6
sp|Q03218|MMT1_YEAST	Q03218	MMT1_YEAST	MMT1	510	Saccharomyces cerevisiae (strain ATCC 204508 / S288c)	Mitochondrial metal transporter 1	0	0	3	3
sp|Q03516|RSN1_YEAST	Q03516	RSN1_YEAST	RSN1	953	Saccharomyces cerevisiae (strain ATCC 204508 / S288c)	Uncharacterized protein RSN1	0	0	3	11
sp|Q03790|NUP53_YEAST	Q03790	NUP53_YEAST	NUP53	475	Saccharomyces cerevisiae (strain ATCC 204508 / S288c)	Nucleoporin NUP53	0	0	3	7
sp|Q04301|VBA1_YEAST	Q04301	VBA1_YEAST	VBA1	562	Saccharomyces cerevisiae (strain ATCC 204508 / S288c)	Vacuolar basic amino acid transporter 1	0	0	3	14
sp|Q04969|SPC2_YEAST	Q04969	SPC2_YEAST	SPC2	178	Saccharomyces cerevisiae (strain ATCC 204508 / S288c)	Signal peptidase complex subunit 2	0	0	3	6
sp|Q05867|YL283_YEAST	Q05867	YL283_YEAST	YLR283W	314	Saccharomyces cerevisiae (strain ATCC 204508 / S288c)	Uncharacterized protein YLR283W, mitochondrial	0	0	3	8
sp|Q06011|ECM19_YEAST	Q06011	ECM19_YEAST	ECM19	112	Saccharomyces cerevisiae (strain ATCC 204508 / S288c)	Protein ECM19	0	0	3	4
sp|Q08199|SIL1_YEAST	Q08199	SIL1_YEAST	SIL1	421	Saccharomyces cerevisiae (strain ATCC 204508 / S288c)	Nucleotide exchange factor SIL1	0	0	3	1
sp|Q08749|TIM18_YEAST	Q08749	TIM18_YEAST	TIM18	192	Saccharomyces cerevisiae (strain ATCC 204508 / S288c)	Mitochondrial import inner membrane translocase subunit TIM18	0	0	3	6
sp|Q08905|FRE3_YEAST	Q08905	FRE3_YEAST	FRE3	711	Saccharomyces cerevisiae (strain ATCC 204508 / S288c)	Ferric reductase transmembrane component 3	0	0	3	3
sp|Q08986|SAM3_YEAST	Q08986	SAM3_YEAST	SAM3	587	Saccharomyces cerevisiae (strain ATCC 204508 / S288c)	S-adenosylmethionine permease SAM3	0	0	3	4
sp|Q12001|ALG6_YEAST	Q12001	ALG6_YEAST	ALG6	544	Saccharomyces cerevisiae (strain ATCC 204508 / S288c)	Dolichyl pyrophosphate Man9GlcNAc2 alpha-1,3-glucosyltransferase	0	0	3	6
sp|Q12209|FRE8_YEAST	Q12209	FRE8_YEAST	FRE8	686	Saccharomyces cerevisiae (strain ATCC 204508 / S288c)	Probable ferric reductase transmembrane component 8	0	0	3	7
sp|Q12255|NYV1_YEAST	Q12255	NYV1_YEAST	NYV1	253	Saccharomyces cerevisiae (strain ATCC 204508 / S288c)	Vacuolar v-SNARE NYV1	0	0	3	2
sp|Q12403|ERP3_YEAST	Q12403	ERP3_YEAST	ERP3	225	Saccharomyces cerevisiae (strain ATCC 204508 / S288c)	Protein ERP3	0	0	3	4
sp|Q92316|OST5_YEAST	Q92316	OST5_YEAST	OST5	86	Saccharomyces cerevisiae (strain ATCC 204508 / S288c)	Dolichyl-diphosphooligosaccharide--protein glycosyltransferase subunit OST5	0	0	3	1
sp|Q96VH5|MIC10_YEAST	Q96VH5	MIC10_YEAST	MIC10	97	Saccharomyces cerevisiae (strain ATCC 204508 / S288c)	MICOS complex subunit MIC10	1	4	3	13
tr|A6ZYI6|A6ZYI6_YEAS7	A6ZYI6	A6ZYI6_YEAS7	RTN1	295	Saccharomyces cerevisiae (strain YJM789)	Reticulon-like protein	0	0	3	1
tr|A7A0P2|A7A0P2_YEAS7	A7A0P2	A7A0P2_YEAS7	SCY_3566	108	Saccharomyces cerevisiae (strain YJM789)	ER membrane protein complex subunit 6	0	1	3	8
sp|A5Z2X5|YP010_YEAST	A5Z2X5	YP010_YEAST	YPR010C-A	72	Saccharomyces cerevisiae (strain ATCC 204508 / S288c)	UPF0495 protein YPR010C-A	4	5	2	2
sp|A6ZKT1|VPS10_YEAS7	A6ZKT1	VPS10_YEAS7	PEP1	1579	Saccharomyces cerevisiae (strain YJM789)	Vacuolar protein sorting/targeting protein PEP1	0	0	2	9
sp|A6ZP42|LIPA_YEAS7	A6ZP42	LIPA_YEAS7	LIP5	414	Saccharomyces cerevisiae (strain YJM789)	Lipoyl synthase, mitochondrial	0	0	2	8
sp|A6ZTW6|GMT1_YEAS7	A6ZTW6	GMT1_YEAS7	VRG4	337	Saccharomyces cerevisiae (strain YJM789)	GDP-mannose transporter 1	0	0	2	3
sp|A6ZTX2|MDM34_YEAS7	A6ZTX2	MDM34_YEAS7	MDM34	459	Saccharomyces cerevisiae (strain YJM789)	Mitochondrial distribution and morphology protein 34	0	0	2	3
sp|A6ZU25|AIM14_YEAS7	A6ZU25	AIM14_YEAS7	AIM14	570	Saccharomyces cerevisiae (strain YJM789)	Probable metalloreductase AIM14	0	0	2	4
sp|A6ZX97|AIM6_YEAS7	A6ZX97	AIM6_YEAS7	AIM6	390	Saccharomyces cerevisiae (strain YJM789)	Altered inheritance of mitochondria protein 6	0	0	2	4
sp|A6ZXN8|NUR1_YEAS7	A6ZXN8	NUR1_YEAS7	NUR1	484	Saccharomyces cerevisiae (strain YJM789)	Nuclear rim protein 1	0	0	2	6
sp|A7A285|YFL5_YEAS7	A7A285	YFL5_YEAS7	SCY_1795	309	Saccharomyces cerevisiae (strain YJM789)	Uncharacterized mitochondrial carrier SCY_1795	0	0	2	9
sp|O74700|TIM9_YEAST	O74700	TIM9_YEAST	TIM9	87	Saccharomyces cerevisiae (strain ATCC 204508 / S288c)	Mitochondrial import inner membrane translocase subunit TIM9	0	0	2	2
sp|P00546|CDK1_YEAST	P00546	CDK1_YEAST	CDC28	298	Saccharomyces cerevisiae (strain ATCC 204508 / S288c)	Cyclin-dependent kinase 1	0	0	2	5
sp|P00924|ENO1_YEAST	P00924	ENO1_YEAST	ENO1	437	Saccharomyces cerevisiae (strain ATCC 204508 / S288c)	Enolase 1	0	0	2	8
sp|P00931|TRP_YEAST	P00931	TRP_YEAST	TRP5	707	Saccharomyces cerevisiae (strain ATCC 204508 / S288c)	Tryptophan synthase	0	0	2	6
sp|P04039|COX8_YEAST	P04039	COX8_YEAST	COX8	78	Saccharomyces cerevisiae (strain ATCC 204508 / S288c)	Cytochrome c oxidase subunit 8, mitochondrial	1	4	2	5
sp|P04650|RL39_YEAST	P04650	RL39_YEAST	RPL39	51	Saccharomyces cerevisiae (strain ATCC 204508 / S288c)	Large ribosomal subunit protein eL39	0	9	2	0
sp|P05737|RL7A_YEAST	P05737	RL7A_YEAST	RPL7A	244	Saccharomyces cerevisiae (strain ATCC 204508 / S288c)	Large ribosomal subunit protein uL30A	0	0	2	4
sp|P07263|SYH_YEAST	P07263	SYH_YEAST	HTS1	546	Saccharomyces cerevisiae (strain ATCC 204508 / S288c)	Histidine--tRNA ligase, mitochondrial	0	0	2	6
sp|P07280|RS19A_YEAST	P07280	RS19A_YEAST	RPS19A	144	Saccharomyces cerevisiae (strain ATCC 204508 / S288c)	Small ribosomal subunit protein eS19A	0	0	2	2
sp|P0CX51|RS16A_YEAST	P0CX51	RS16A_YEAST	RPS16A	143	Saccharomyces cerevisiae (strain ATCC 204508 / S288c)	Small ribosomal subunit protein uS9A	0	0	2	6
sp|P10834|PET54_YEAST	P10834	PET54_YEAST	PET54	293	Saccharomyces cerevisiae (strain ATCC 204508 / S288c)	Protein PET54	0	0	2	5
sp|P10849|MTF2_YEAST	P10849	MTF2_YEAST	MTF2	440	Saccharomyces cerevisiae (strain ATCC 204508 / S288c)	Mitochondrial transcription factor 2	0	0	2	8
sp|P11325|SYLM_YEAST	P11325	SYLM_YEAST	NAM2	894	Saccharomyces cerevisiae (strain ATCC 204508 / S288c)	Leucine--tRNA ligase, mitochondrial	0	0	2	4
sp|P11938|RAP1_YEAST	P11938	RAP1_YEAST	RAP1	827	Saccharomyces cerevisiae (strain ATCC 204508 / S288c)	DNA-binding protein RAP1	0	0	2	2
sp|P12611|WHI2_YEAST	P12611	WHI2_YEAST	WHI2	486	Saccharomyces cerevisiae (strain ATCC 204508 / S288c)	Growth regulation protein	0	0	2	1
sp|P12709|G6PI_YEAST	P12709	G6PI_YEAST	PGI1	554	Saccharomyces cerevisiae (strain ATCC 204508 / S288c)	Glucose-6-phosphate isomerase	0	0	2	4
sp|P12868|PEP5_YEAST	P12868	PEP5_YEAST	PEP5	1029	Saccharomyces cerevisiae (strain ATCC 204508 / S288c)	E3 ubiquitin-protein ligase PEP5	0	0	2	9
sp|P13856|RSR1_YEAST	P13856	RSR1_YEAST	RSR1	272	Saccharomyces cerevisiae (strain ATCC 204508 / S288c)	Ras-related protein RSR1	0	0	2	3
sp|P15019|TAL1_YEAST	P15019	TAL1_YEAST	TAL1	335	Saccharomyces cerevisiae (strain ATCC 204508 / S288c)	Transaldolase	0	0	2	5
sp|P21592|COX10_YEAST	P21592	COX10_YEAST	COX10	462	Saccharomyces cerevisiae (strain ATCC 204508 / S288c)	Protoheme IX farnesyltransferase, mitochondrial	0	0	2	4
sp|P22146|GAS1_YEAST	P22146	GAS1_YEAST	GAS1	559	Saccharomyces cerevisiae (strain ATCC 204508 / S288c)	1,3-beta-glucanosyltransferase GAS1	0	0	2	3
sp|P22214|SEC22_YEAST	P22214	SEC22_YEAST	SEC22	214	Saccharomyces cerevisiae (strain ATCC 204508 / S288c)	Protein transport protein SEC22	0	0	2	5
sp|P22217|TRX1_YEAST	P22217	TRX1_YEAST	TRX1	103	Saccharomyces cerevisiae (strain ATCC 204508 / S288c)	Thioredoxin-1	0	0	2	1
sp|P23968|VATO_YEAST	P23968	VATO_YEAST	VMA16	213	Saccharomyces cerevisiae (strain ATCC 204508 / S288c)	V-type proton ATPase subunit c''	0	0	2	4
sp|P25491|MAS5_YEAST	P25491	MAS5_YEAST	YDJ1	409	Saccharomyces cerevisiae (strain ATCC 204508 / S288c)	Mitochondrial protein import protein MAS5	0	0	2	5
sp|P25623|SYP1_YEAST	P25623	SYP1_YEAST	SYP1	870	Saccharomyces cerevisiae (strain ATCC 204508 / S288c)	Suppressor of yeast profilin deletion	0	0	2	3
sp|P25626|IMG1_YEAST	P25626	IMG1_YEAST	IMG1	169	Saccharomyces cerevisiae (strain ATCC 204508 / S288c)	Large ribosomal subunit protein bL19m	0	0	2	4
sp|P28627|IMP1_YEAST	P28627	IMP1_YEAST	IMP1	190	Saccharomyces cerevisiae (strain ATCC 204508 / S288c)	Mitochondrial inner membrane protease subunit 1	0	0	2	9
sp|P28795|PEX3_YEAST	P28795	PEX3_YEAST	PEX3	441	Saccharomyces cerevisiae (strain ATCC 204508 / S288c)	Peroxisomal biogenesis factor 3	0	0	2	3
sp|P29465|CHS3_YEAST	P29465	CHS3_YEAST	CHS3	1165	Saccharomyces cerevisiae (strain ATCC 204508 / S288c)	Chitin synthase 3	0	0	2	4
sp|P30777|GPI10_YEAST	P30777	GPI10_YEAST	GPI10	616	Saccharomyces cerevisiae (strain ATCC 204508 / S288c)	GPI mannosyltransferase 3	0	0	2	4
sp|P31539|HS104_YEAST	P31539	HS104_YEAST	HSP104	908	Saccharomyces cerevisiae (strain ATCC 204508 / S288c)	Heat shock protein 104	0	0	2	8
sp|P32074|COPG_YEAST	P32074	COPG_YEAST	SEC21	935	Saccharomyces cerevisiae (strain ATCC 204508 / S288c)	Coatomer subunit gamma	0	0	2	2
sp|P32568|SNQ2_YEAST	P32568	SNQ2_YEAST	SNQ2	1501	Saccharomyces cerevisiae (strain ATCC 204508 / S288c)	Protein SNQ2	0	0	2	19
sp|P32618|YEF3_YEAST	P32618	YEF3_YEAST	YEL043W	956	Saccharomyces cerevisiae (strain ATCC 204508 / S288c)	Uncharacterized protein YEL043W	0	0	2	3
sp|P32839|BCS1_YEAST	P32839	BCS1_YEAST	BCS1	456	Saccharomyces cerevisiae (strain ATCC 204508 / S288c)	Mitochondrial chaperone BCS1	0	0	2	14
sp|P32860|NFU1_YEAST	P32860	NFU1_YEAST	NFU1	256	Saccharomyces cerevisiae (strain ATCC 204508 / S288c)	NifU-like protein, mitochondrial	0	0	2	6
sp|P32867|SSO1_YEAST	P32867	SSO1_YEAST	SSO1	290	Saccharomyces cerevisiae (strain ATCC 204508 / S288c)	Protein SSO1	0	0	2	0
sp|P32874|HFA1_YEAST	P32874	HFA1_YEAST	HFA1	2273	Saccharomyces cerevisiae (strain ATCC 204508 / S288c)	Acetyl-CoA carboxylase, mitochondrial	70	68	2	19
sp|P32898|PREP_YEAST	P32898	PREP_YEAST	CYM1	989	Saccharomyces cerevisiae (strain ATCC 204508 / S288c)	Presequence protease, mitochondrial	0	0	2	12
sp|P34251|YKK7_YEAST	P34251	YKK7_YEAST	YKL107W	309	Saccharomyces cerevisiae (strain ATCC 204508 / S288c)	Uncharacterized oxidoreductase YKL107W	0	0	2	1
sp|P35845|OSH1_YEAST	P35845	OSH1_YEAST	SWH1	1188	Saccharomyces cerevisiae (strain ATCC 204508 / S288c)	Oxysterol-binding protein homolog 1	0	0	2	9
sp|P36029|TPO5_YEAST	P36029	TPO5_YEAST	TPO5	618	Saccharomyces cerevisiae (strain ATCC 204508 / S288c)	Polyamine transporter TPO5	0	0	2	3
sp|P36066|MGR3L_YEAST	P36066	MGR3L_YEAST	YKL133C	463	Saccharomyces cerevisiae (strain ATCC 204508 / S288c)	Protein MRG3-like	0	0	2	4
sp|P36105|RL14A_YEAST	P36105	RL14A_YEAST	RPL14A	138	Saccharomyces cerevisiae (strain ATCC 204508 / S288c)	Large ribosomal subunit protein eL14A	0	2	2	3
sp|P36125|GMH1_YEAST	P36125	GMH1_YEAST	GMH1	273	Saccharomyces cerevisiae (strain ATCC 204508 / S288c)	Protein GMH1	0	0	2	1
sp|P36151|YK50_YEAST	P36151	YK50_YEAST	YKR070W	352	Saccharomyces cerevisiae (strain ATCC 204508 / S288c)	Uncharacterized protein YKR070W	0	0	2	5
sp|P36163|OMA1_YEAST	P36163	OMA1_YEAST	OMA1	345	Saccharomyces cerevisiae (strain ATCC 204508 / S288c)	Mitochondrial metalloendopeptidase OMA1	0	0	2	8
sp|P38069|MNN2_YEAST	P38069	MNN2_YEAST	MNN2	597	Saccharomyces cerevisiae (strain ATCC 204508 / S288c)	Alpha-1,2-mannosyltransferase MNN2	0	0	2	4
sp|P38084|BAP2_YEAST	P38084	BAP2_YEAST	BAP2	609	Saccharomyces cerevisiae (strain ATCC 204508 / S288c)	Leu/Val/Ile amino-acid permease	0	0	2	10
sp|P38090|AGP2_YEAST	P38090	AGP2_YEAST	AGP2	596	Saccharomyces cerevisiae (strain ATCC 204508 / S288c)	General amino acid permease AGP2	0	0	2	4
sp|P38131|KTR4_YEAST	P38131	KTR4_YEAST	KTR4	464	Saccharomyces cerevisiae (strain ATCC 204508 / S288c)	Probable mannosyltransferase KTR4	0	0	2	0
sp|P38298|YPC1_YEAST	P38298	YPC1_YEAST	YPC1	316	Saccharomyces cerevisiae (strain ATCC 204508 / S288c)	Alkaline ceramidase YPC1	0	0	2	5
sp|P38701|RS20_YEAST	P38701	RS20_YEAST	RPS20	121	Saccharomyces cerevisiae (strain ATCC 204508 / S288c)	Small ribosomal subunit protein uS10	0	0	2	3
sp|P38705|SYSM_YEAST	P38705	SYSM_YEAST	DIA4	446	Saccharomyces cerevisiae (strain ATCC 204508 / S288c)	Serine--tRNA ligase, mitochondrial	0	0	2	2
sp|P38925|SMF1_YEAST	P38925	SMF1_YEAST	SMF1	575	Saccharomyces cerevisiae (strain ATCC 204508 / S288c)	Manganese transporter SMF1	0	0	2	1
sp|P38995|ATU2_YEAST	P38995	ATU2_YEAST	CCC2	1004	Saccharomyces cerevisiae (strain ATCC 204508 / S288c)	Copper-transporting ATPase	0	0	2	13
sp|P39102|XDJ1_YEAST	P39102	XDJ1_YEAST	XDJ1	459	Saccharomyces cerevisiae (strain ATCC 204508 / S288c)	DnaJ protein homolog XDJ1	0	0	2	6
sp|P39935|IF4F1_YEAST	P39935	IF4F1_YEAST	TIF4631	952	Saccharomyces cerevisiae (strain ATCC 204508 / S288c)	Eukaryotic initiation factor 4F subunit p150	0	0	2	7
sp|P39954|SAHH_YEAST	P39954	SAHH_YEAST	SAH1	449	Saccharomyces cerevisiae (strain ATCC 204508 / S288c)	Adenosylhomocysteinase	0	0	2	4
sp|P40150|SSB2_YEAST	P40150	SSB2_YEAST	SSB2	613	Saccharomyces cerevisiae (strain ATCC 204508 / S288c)	Ribosome-associated molecular chaperone SSB2	0	2	2	2
sp|P40482|SEC24_YEAST	P40482	SEC24_YEAST	SEC24	926	Saccharomyces cerevisiae (strain ATCC 204508 / S288c)	Protein transport protein SEC24	0	0	2	2
sp|P40525|RL34B_YEAST	P40525	RL34B_YEAST	RPL34B	121	Saccharomyces cerevisiae (strain ATCC 204508 / S288c)	Large ribosomal subunit protein eL34B	2	1	2	4
sp|P40548|SNL1_YEAST	P40548	SNL1_YEAST	SNL1	159	Saccharomyces cerevisiae (strain ATCC 204508 / S288c)	HSP70 co-chaperone SNL1	0	0	2	4
sp|P40990|MSS2_YEAST	P40990	MSS2_YEAST	MSS2	351	Saccharomyces cerevisiae (strain ATCC 204508 / S288c)	Protein MSS2, mitochondrial	0	0	2	1
sp|P41735|COQ7_YEAST	P41735	COQ7_YEAST	CAT5	233	Saccharomyces cerevisiae (strain ATCC 204508 / S288c)	5-demethoxyubiquinone hydroxylase, mitochondrial	0	0	2	12
sp|P41815|BAP3_YEAST	P41815	BAP3_YEAST	BAP3	604	Saccharomyces cerevisiae (strain ATCC 204508 / S288c)	Valine amino-acid permease	0	0	2	1
sp|P41940|MPG1_YEAST	P41940	MPG1_YEAST	PSA1	361	Saccharomyces cerevisiae (strain ATCC 204508 / S288c)	Mannose-1-phosphate guanyltransferase	0	0	2	2
sp|P43594|MIC19_YEAST	P43594	MIC19_YEAST	MIC19	170	Saccharomyces cerevisiae (strain ATCC 204508 / S288c)	MICOS complex subunit MIC19	0	0	2	1
sp|P43620|RMD8_YEAST	P43620	RMD8_YEAST	RMD8	662	Saccharomyces cerevisiae (strain ATCC 204508 / S288c)	Sporulation protein RMD8	0	0	2	6
sp|P46681|DLD2_YEAST	P46681	DLD2_YEAST	DLD2	530	Saccharomyces cerevisiae (strain ATCC 204508 / S288c)	D-2-hydroxyglutarate--pyruvate transhydrogenase DLD2	0	0	2	7
sp|P46998|FMP33_YEAST	P46998	FMP33_YEAST	FMP33	180	Saccharomyces cerevisiae (strain ATCC 204508 / S288c)	Mitochondrial membrane protein FMP33	0	0	2	6
sp|P47039|BNA3_YEAST	P47039	BNA3_YEAST	BNA3	444	Saccharomyces cerevisiae (strain ATCC 204508 / S288c)	Probable kynurenine--oxoglutarate transaminase BNA3	0	0	2	9
sp|P47069|MPS3_YEAST	P47069	MPS3_YEAST	MPS3	682	Saccharomyces cerevisiae (strain ATCC 204508 / S288c)	Spindle pole body assembly component MPS3	0	0	2	2
sp|P47081|COX16_YEAST	P47081	COX16_YEAST	COX16	118	Saccharomyces cerevisiae (strain ATCC 204508 / S288c)	Cytochrome c oxidase assembly protein COX16, mitochondrial	0	0	2	5
sp|P47141|RT26_YEAST	P47141	RT26_YEAST	RSM26	266	Saccharomyces cerevisiae (strain ATCC 204508 / S288c)	Small ribosomal subunit protein mS42	0	0	2	7
sp|P49334|TOM22_YEAST	P49334	TOM22_YEAST	TOM22	152	Saccharomyces cerevisiae (strain ATCC 204508 / S288c)	Mitochondrial import receptor subunit TOM22	0	0	2	3
sp|P52867|PMT5_YEAST	P52867	PMT5_YEAST	PMT5	743	Saccharomyces cerevisiae (strain ATCC 204508 / S288c)	Dolichyl-phosphate-mannose--protein mannosyltransferase 5	0	0	2	2
sp|P53049|YOR1_YEAST	P53049	YOR1_YEAST	YOR1	1477	Saccharomyces cerevisiae (strain ATCC 204508 / S288c)	Oligomycin resistance ATP-dependent permease YOR1	0	0	2	4
sp|P53108|YIP5_YEAST	P53108	YIP5_YEAST	YIP5	310	Saccharomyces cerevisiae (strain ATCC 204508 / S288c)	Protein YIP5	0	0	2	4
sp|P53112|PEX14_YEAST	P53112	PEX14_YEAST	PEX14	341	Saccharomyces cerevisiae (strain ATCC 204508 / S288c)	Peroxisomal membrane protein PEX14	0	0	2	2
sp|P53121|FLC3_YEAST	P53121	FLC3_YEAST	FLC3	802	Saccharomyces cerevisiae (strain ATCC 204508 / S288c)	Putative flavin carrier protein 3	0	0	2	4
sp|P53157|MPC1_YEAST	P53157	MPC1_YEAST	MPC1	130	Saccharomyces cerevisiae (strain ATCC 204508 / S288c)	Mitochondrial pyruvate carrier 1	0	0	2	5
sp|P53248|PEX8_YEAST	P53248	PEX8_YEAST	PEX8	589	Saccharomyces cerevisiae (strain ATCC 204508 / S288c)	Peroxisomal biogenesis factor 8	0	0	2	6
sp|P53259|PCP1_YEAST	P53259	PCP1_YEAST	PCP1	346	Saccharomyces cerevisiae (strain ATCC 204508 / S288c)	Rhomboid protein 1, mitochondrial	0	0	2	5
sp|P53292|RT35_YEAST	P53292	RT35_YEAST	MRPS35	345	Saccharomyces cerevisiae (strain ATCC 204508 / S288c)	Small ribosomal subunit protein mS45	0	0	2	3
sp|P53297|PBP1_YEAST	P53297	PBP1_YEAST	PBP1	722	Saccharomyces cerevisiae (strain ATCC 204508 / S288c)	PAB1-binding protein 1	0	0	2	3
sp|P53304|SLI1_YEAST	P53304	SLI1_YEAST	SLI1	468	Saccharomyces cerevisiae (strain ATCC 204508 / S288c)	N-acetyltransferase SLI1	0	0	2	4
sp|P53633|PRA1_YEAST	P53633	PRA1_YEAST	YIP3	176	Saccharomyces cerevisiae (strain ATCC 204508 / S288c)	Prenylated Rab acceptor 1	0	0	2	3
sp|P53878|YNS1_YEAST	P53878	YNS1_YEAST	YNL181W	407	Saccharomyces cerevisiae (strain ATCC 204508 / S288c)	Uncharacterized oxidoreductase YNL181W	0	0	2	5
sp|P53903|PGA2_YEAST	P53903	PGA2_YEAST	PGA2	129	Saccharomyces cerevisiae (strain ATCC 204508 / S288c)	Processing of GAS1 and ALP protein 2	0	0	2	2
sp|P53950|VAC7_YEAST	P53950	VAC7_YEAST	VAC7	1165	Saccharomyces cerevisiae (strain ATCC 204508 / S288c)	Vacuolar segregation protein 7	0	0	2	4
sp|P54074|ASI1_YEAST	P54074	ASI1_YEAST	ASI1	624	Saccharomyces cerevisiae (strain ATCC 204508 / S288c)	ERAD-associated E3 ubiquitin-protein ligase ASI1	0	0	2	12
sp|P54857|TGL2_YEAST	P54857	TGL2_YEAST	TGL2	326	Saccharomyces cerevisiae (strain ATCC 204508 / S288c)	Triacylglycerol lipase 2	0	0	2	11
sp|P81451|ATP19_YEAST	P81451	ATP19_YEAST	ATP19	68	Saccharomyces cerevisiae (strain ATCC 204508 / S288c)	ATP synthase subunit K, mitochondrial	0	0	2	3
sp|Q02204|RM13_YEAST	Q02204	RM13_YEAST	MRPL13	264	Saccharomyces cerevisiae (strain ATCC 204508 / S288c)	Large ribosomal subunit protein mL50	0	0	2	5
sp|Q02205|MEH1_YEAST	Q02205	MEH1_YEAST	MEH1	184	Saccharomyces cerevisiae (strain ATCC 204508 / S288c)	Protein MEH1	0	0	2	4
sp|Q02457|TBF1_YEAST	Q02457	TBF1_YEAST	TBF1	562	Saccharomyces cerevisiae (strain ATCC 204508 / S288c)	Protein TBF1	0	0	2	1
sp|Q02896|YDC1_YEAST	Q02896	YDC1_YEAST	YDC1	317	Saccharomyces cerevisiae (strain ATCC 204508 / S288c)	Alkaline ceramidase YDC1	0	0	2	5
sp|Q03020|ISU1_YEAST	Q03020	ISU1_YEAST	ISU1	165	Saccharomyces cerevisiae (strain ATCC 204508 / S288c)	Iron sulfur cluster assembly protein 1, mitochondrial	0	0	2	0
sp|Q03151|MTG1_YEAST	Q03151	MTG1_YEAST	MTG1	367	Saccharomyces cerevisiae (strain ATCC 204508 / S288c)	Mitochondrial GTPase 1	0	0	2	2
sp|Q03195|RLI1_YEAST	Q03195	RLI1_YEAST	RLI1	608	Saccharomyces cerevisiae (strain ATCC 204508 / S288c)	Translation initiation factor RLI1	0	0	2	7
sp|Q03246|RT17_YEAST	Q03246	RT17_YEAST	MRPS17	237	Saccharomyces cerevisiae (strain ATCC 204508 / S288c)	Small ribosomal subunit protein uS17m	0	0	2	5
sp|Q03455|MSC2_YEAST	Q03455	MSC2_YEAST	MSC2	724	Saccharomyces cerevisiae (strain ATCC 204508 / S288c)	Probable zinc transporter MSC2	0	0	2	10
sp|Q03723|OST6_YEAST	Q03723	OST6_YEAST	OST6	332	Saccharomyces cerevisiae (strain ATCC 204508 / S288c)	Dolichyl-diphosphooligosaccharide--protein glycosyltransferase subunit OST6	0	0	2	4
sp|Q04201|CUE4_YEAST	Q04201	CUE4_YEAST	CUE4	117	Saccharomyces cerevisiae (strain ATCC 204508 / S288c)	CUE domain-containing protein CUE4	0	0	2	10
sp|Q04401|SDHF3_YEAST	Q04401	SDHF3_YEAST	SDH7	133	Saccharomyces cerevisiae (strain ATCC 204508 / S288c)	Succinate dehydrogenase assembly factor 3, mitochondrial	0	0	2	4
sp|Q04487|SHH3_YEAST	Q04487	SHH3_YEAST	SHH3	196	Saccharomyces cerevisiae (strain ATCC 204508 / S288c)	Mitochondrial inner membrane protein SHH3	0	0	2	1
sp|Q06144|ORM2_YEAST	Q06144	ORM2_YEAST	ORM2	216	Saccharomyces cerevisiae (strain ATCC 204508 / S288c)	Protein ORM2	0	0	2	5
sp|Q06346|KEI1_YEAST	Q06346	KEI1_YEAST	KEI1	221	Saccharomyces cerevisiae (strain ATCC 204508 / S288c)	Inositol phosphorylceramide synthase regulatory subunit KEI1	0	0	2	2
sp|Q06408|ARO10_YEAST	Q06408	ARO10_YEAST	ARO10	635	Saccharomyces cerevisiae (strain ATCC 204508 / S288c)	Transaminated amino acid decarboxylase	0	0	2	6
sp|Q06616|YP174_YEAST	Q06616	YP174_YEAST	YPR174C	221	Saccharomyces cerevisiae (strain ATCC 204508 / S288c)	Nuclear envelope protein YPR174C	0	0	2	2
sp|Q06636|GPI11_YEAST	Q06636	GPI11_YEAST	GPI11	219	Saccharomyces cerevisiae (strain ATCC 204508 / S288c)	Glycosylphosphatidylinositol anchor biosynthesis protein 11	0	0	2	3
sp|Q06708|VAC14_YEAST	Q06708	VAC14_YEAST	VAC14	880	Saccharomyces cerevisiae (strain ATCC 204508 / S288c)	Vacuole morphology and inheritance protein 14	0	0	2	1
sp|Q07376|MCH1_YEAST	Q07376	MCH1_YEAST	MCH1	486	Saccharomyces cerevisiae (strain ATCC 204508 / S288c)	Probable transporter MCH1	0	0	2	3
sp|Q07468|VAM6_YEAST	Q07468	VAM6_YEAST	VAM6	1049	Saccharomyces cerevisiae (strain ATCC 204508 / S288c)	Vacuolar morphogenesis protein 6	0	0	2	11
sp|Q08280|BSC6_YEAST	Q08280	BSC6_YEAST	BSC6	497	Saccharomyces cerevisiae (strain ATCC 204508 / S288c)	Bypass of stop codon protein 6	0	0	2	5
sp|Q08954|YP199_YEAST	Q08954	YP199_YEAST	YPL199C	240	Saccharomyces cerevisiae (strain ATCC 204508 / S288c)	Smr domain-containing protein YPL199C	0	0	2	3
sp|Q12016|VPS68_YEAST	Q12016	VPS68_YEAST	VPS68	184	Saccharomyces cerevisiae (strain ATCC 204508 / S288c)	Vacuolar protein sorting-associated protein 68	0	0	2	2
sp|Q12166|LEU9_YEAST	Q12166	LEU9_YEAST	LEU9	604	Saccharomyces cerevisiae (strain ATCC 204508 / S288c)	2-isopropylmalate synthase 2, mitochondrial	0	0	2	4
sp|Q12387|NAA25_YEAST	Q12387	NAA25_YEAST	MDM20	796	Saccharomyces cerevisiae (strain ATCC 204508 / S288c)	N-terminal acetyltransferase B complex subunit MDM20	0	0	2	1
sp|Q12449|AHA1_YEAST	Q12449	AHA1_YEAST	AHA1	350	Saccharomyces cerevisiae (strain ATCC 204508 / S288c)	Hsp90 co-chaperone AHA1	0	0	2	11
sp|Q12473|FRE6_YEAST	Q12473	FRE6_YEAST	FRE6	712	Saccharomyces cerevisiae (strain ATCC 204508 / S288c)	Ferric reductase transmembrane component 6	0	0	2	8
sp|Q12745|SEC39_YEAST	Q12745	SEC39_YEAST	SEC39	709	Saccharomyces cerevisiae (strain ATCC 204508 / S288c)	Protein transport protein SEC39	0	0	2	8
tr|B5VPK1|B5VPK1_YEAS6	B5VPK1	B5VPK1_YEAS6	AWRI1631_132140	53	Saccharomyces cerevisiae (strain AWRI1631)	Uncharacterized protein	2	2	2	3
tr|E9P9Y2|E9P9Y2_YEASX	E9P9Y2	E9P9Y2_YEASX	ILV5G	395	Saccharomyces cerevisiae	Ketol-acid reductoisomerase, mitochondrial	0	0	2	5
sp|A6ZL22|ECM33_YEAS7	A6ZL22	ECM33_YEAS7	ECM33	429	Saccharomyces cerevisiae (strain YJM789)	Cell wall protein ECM33	5	0	1	4
sp|A6ZN14|LIP1_YEAS7	A6ZN14	LIP1_YEAS7	LIP1	150	Saccharomyces cerevisiae (strain YJM789)	Ceramide synthase subunit LIP1	0	0	1	3
sp|A6ZPT1|LPLA_YEAS7	A6ZPT1	LPLA_YEAS7	AIM22	409	Saccharomyces cerevisiae (strain YJM789)	Putative lipoate-protein ligase A	0	0	1	2
sp|A6ZS94|ATP23_YEAS7	A6ZS94	ATP23_YEAS7	ATP23	227	Saccharomyces cerevisiae (strain YJM789)	Mitochondrial inner membrane protease ATP23	0	0	1	2
sp|A6ZUB2|MRH4_YEAS7	A6ZUB2	MRH4_YEAS7	MRH4	561	Saccharomyces cerevisiae (strain YJM789)	ATP-dependent RNA helicase MRH4, mitochondrial	0	0	1	3
sp|A6ZUK8|YPP1_YEAS7	A6ZUK8	YPP1_YEAS7	YPP1	817	Saccharomyces cerevisiae (strain YJM789)	Cargo-transport protein YPP1	0	0	1	3
sp|A6ZWL1|NACB1_YEAS7	A6ZWL1	NACB1_YEAS7	EGD1	157	Saccharomyces cerevisiae (strain YJM789)	Nascent polypeptide-associated complex subunit beta-1	0	0	1	1
sp|A6ZXP4|SUB2_YEAS7	A6ZXP4	SUB2_YEAS7	SUB2	446	Saccharomyces cerevisiae (strain YJM789)	ATP-dependent RNA helicase SUB2	0	0	1	1
sp|A6ZYI0|KAD2_YEAS7	A6ZYI0	KAD2_YEAS7	ADK1	222	Saccharomyces cerevisiae (strain YJM789)	Adenylate kinase	0	0	1	1
sp|A6ZZI5|COXM1_YEAS7	A6ZZI5	COXM1_YEAS7	CMC1	111	Saccharomyces cerevisiae (strain YJM789)	COX assembly mitochondrial protein	0	0	1	6
sp|A6ZZY2|YKR18_YEAS7	A6ZZY2	YKR18_YEAS7	SCY_3392	725	Saccharomyces cerevisiae (strain YJM789)	IML2-like protein SCY_3392	0	0	1	10
sp|A6ZZZ8|CAF4_YEAS7	A6ZZZ8	CAF4_YEAS7	CAF4	645	Saccharomyces cerevisiae (strain YJM789)	CCR4-associated factor 4	0	0	1	11
sp|A7A0Q0|MMM1_YEAS7	A7A0Q0	MMM1_YEAS7	MMM1	426	Saccharomyces cerevisiae (strain YJM789)	Maintenance of mitochondrial morphology protein 1	0	0	1	4
sp|B3LJN9|AIM41_YEAS1	B3LJN9	AIM41_YEAS1	AIM41	185	Saccharomyces cerevisiae (strain RM11-1a)	Altered inheritance of mitochondria protein 41, mitochondrial	0	0	1	9
sp|P00950|PMG1_YEAST	P00950	PMG1_YEAST	GPM1	247	Saccharomyces cerevisiae (strain ATCC 204508 / S288c)	Phosphoglycerate mutase 1	0	0	1	1
sp|P06781|RHO2_YEAST	P06781	RHO2_YEAST	RHO2	192	Saccharomyces cerevisiae (strain ATCC 204508 / S288c)	GTP-binding protein RHO2	0	0	1	5
sp|P07245|C1TC_YEAST	P07245	C1TC_YEAST	ADE3	946	Saccharomyces cerevisiae (strain ATCC 204508 / S288c)	C-1-tetrahydrofolate synthase, cytoplasmic	0	0	1	2
sp|P07248|ADR1_YEAST	P07248	ADR1_YEAST	ADR1	1323	Saccharomyces cerevisiae (strain ATCC 204508 / S288c)	Regulatory protein ADR1	0	0	1	3
sp|P07260|IF4E_YEAST	P07260	IF4E_YEAST	CDC33	213	Saccharomyces cerevisiae (strain ATCC 204508 / S288c)	Eukaryotic translation initiation factor 4E	0	0	1	0
sp|P07390|PT494_YEAST	P07390	PT494_YEAST	PET494	489	Saccharomyces cerevisiae (strain ATCC 204508 / S288c)	COX3 mRNA-specific translational activator PET494	0	0	1	9
sp|P09436|SYIC_YEAST	P09436	SYIC_YEAST	ILS1	1072	Saccharomyces cerevisiae (strain ATCC 204508 / S288c)	Isoleucine--tRNA ligase, cytoplasmic	0	0	1	1
sp|P10622|RLA3_YEAST	P10622	RLA3_YEAST	RPP1B	106	Saccharomyces cerevisiae (strain ATCC 204508 / S288c)	Large ribosomal subunit protein P1B	0	0	1	9
sp|P13433|RPOM_YEAST	P13433	RPOM_YEAST	RPO41	1351	Saccharomyces cerevisiae (strain ATCC 204508 / S288c)	DNA-directed RNA polymerase, mitochondrial	0	0	1	10
sp|P15303|SEC23_YEAST	P15303	SEC23_YEAST	SEC23	768	Saccharomyces cerevisiae (strain ATCC 204508 / S288c)	Protein transport protein SEC23	0	0	1	3
sp|P15705|STI1_YEAST	P15705	STI1_YEAST	STI1	589	Saccharomyces cerevisiae (strain ATCC 204508 / S288c)	Heat shock protein STI1	0	0	1	4
sp|P15992|HSP26_YEAST	P15992	HSP26_YEAST	HSP26	214	Saccharomyces cerevisiae (strain ATCC 204508 / S288c)	Heat shock protein 26	0	0	1	0
sp|P16861|PFKA1_YEAST	P16861	PFKA1_YEAST	PFK1	987	Saccharomyces cerevisiae (strain ATCC 204508 / S288c)	ATP-dependent 6-phosphofructokinase subunit alpha	0	0	1	3
sp|P17106|CBF1_YEAST	P17106	CBF1_YEAST	CBF1	351	Saccharomyces cerevisiae (strain ATCC 204508 / S288c)	Centromere-binding protein 1	0	0	1	1
sp|P18414|ERD2_YEAST	P18414	ERD2_YEAST	ERD2	219	Saccharomyces cerevisiae (strain ATCC 204508 / S288c)	ER lumen protein-retaining receptor	0	0	1	2
sp|P18851|GBB_YEAST	P18851	GBB_YEAST	STE4	423	Saccharomyces cerevisiae (strain ATCC 204508 / S288c)	Guanine nucleotide-binding protein subunit beta	0	0	1	1
sp|P19097|FAS2_YEAST	P19097	FAS2_YEAST	FAS2	1887	Saccharomyces cerevisiae (strain ATCC 204508 / S288c)	Fatty acid synthase subunit alpha	0	0	1	6
sp|P19524|MYO2_YEAST	P19524	MYO2_YEAST	MYO2	1574	Saccharomyces cerevisiae (strain ATCC 204508 / S288c)	Myosin-2	0	0	1	4
sp|P22219|VPS15_YEAST	P22219	VPS15_YEAST	VPS15	1454	Saccharomyces cerevisiae (strain ATCC 204508 / S288c)	Serine/threonine-protein kinase VPS15	0	0	1	2
sp|P22289|QCR9_YEAST	P22289	QCR9_YEAST	QCR9	66	Saccharomyces cerevisiae (strain ATCC 204508 / S288c)	Cytochrome b-c1 complex subunit 9, mitochondrial	0	0	1	7
sp|P23369|RM25_YEAST	P23369	RM25_YEAST	MRPL25	157	Saccharomyces cerevisiae (strain ATCC 204508 / S288c)	Large ribosomal subunit protein mL59	0	0	1	3
sp|P23642|VAN1_YEAST	P23642	VAN1_YEAST	VAN1	535	Saccharomyces cerevisiae (strain ATCC 204508 / S288c)	Mannan polymerase I complex VAN1 subunit	0	0	1	1
sp|P25580|PBN1_YEAST	P25580	PBN1_YEAST	PBN1	416	Saccharomyces cerevisiae (strain ATCC 204508 / S288c)	Protein PBN1	0	0	1	5
sp|P25628|ARE1_YEAST	P25628	ARE1_YEAST	ARE1	610	Saccharomyces cerevisiae (strain ATCC 204508 / S288c)	Sterol O-acyltransferase 1	0	0	1	1
sp|P26755|RFA3_YEAST	P26755	RFA3_YEAST	RFA3	122	Saccharomyces cerevisiae (strain ATCC 204508 / S288c)	Replication factor A protein 3	0	0	1	3
sp|P27801|PEP3_YEAST	P27801	PEP3_YEAST	PEP3	918	Saccharomyces cerevisiae (strain ATCC 204508 / S288c)	Vacuolar membrane protein PEP3	0	0	1	10
sp|P28240|ACEA_YEAST	P28240	ACEA_YEAST	ICL1	557	Saccharomyces cerevisiae (strain ATCC 204508 / S288c)	Isocitrate lyase	0	0	1	9
sp|P29340|UBCX_YEAST	P29340	UBCX_YEAST	PEX4	183	Saccharomyces cerevisiae (strain ATCC 204508 / S288c)	Ubiquitin-conjugating enzyme E2-21 kDa	0	0	1	3
sp|P30605|ITR1_YEAST	P30605	ITR1_YEAST	ITR1	584	Saccharomyces cerevisiae (strain ATCC 204508 / S288c)	Myo-inositol transporter 1	0	0	1	0
sp|P30822|XPO1_YEAST	P30822	XPO1_YEAST	CRM1	1084	Saccharomyces cerevisiae (strain ATCC 204508 / S288c)	Exportin-1	0	0	1	5
sp|P31109|SNC1_YEAST	P31109	SNC1_YEAST	SNC1	117	Saccharomyces cerevisiae (strain ATCC 204508 / S288c)	Synaptobrevin homolog 1	0	0	1	3
sp|P31334|RM09_YEAST	P31334	RM09_YEAST	MRPL9	269	Saccharomyces cerevisiae (strain ATCC 204508 / S288c)	Large ribosomal subunit protein uL3m	0	0	1	6
sp|P31381|FUN26_YEAST	P31381	FUN26_YEAST	FUN26	517	Saccharomyces cerevisiae (strain ATCC 204508 / S288c)	Nucleoside transporter FUN26	0	0	1	11
sp|P31384|CCR4_YEAST	P31384	CCR4_YEAST	CCR4	837	Saccharomyces cerevisiae (strain ATCC 204508 / S288c)	CCR4-Not complex 3'-5'-exoribonuclease subunit Ccr4	0	0	1	2
sp|P31688|TPS2_YEAST	P31688	TPS2_YEAST	TPS2	896	Saccharomyces cerevisiae (strain ATCC 204508 / S288c)	Trehalose-phosphatase	0	0	1	5
sp|P32388|RM49_YEAST	P32388	RM49_YEAST	MRP49	137	Saccharomyces cerevisiae (strain ATCC 204508 / S288c)	Large ribosomal subunit protein mL61	0	0	1	2
sp|P32445|RIM1_YEAST	P32445	RIM1_YEAST	RIM1	135	Saccharomyces cerevisiae (strain ATCC 204508 / S288c)	Single-stranded DNA-binding protein RIM1, mitochondrial	0	0	1	3
sp|P32485|HOG1_YEAST	P32485	HOG1_YEAST	HOG1	435	Saccharomyces cerevisiae (strain ATCC 204508 / S288c)	Mitogen-activated protein kinase HOG1	0	0	1	3
sp|P32486|KRE6_YEAST	P32486	KRE6_YEAST	KRE6	720	Saccharomyces cerevisiae (strain ATCC 204508 / S288c)	Beta-glucan synthesis-associated protein KRE6	0	0	1	4
sp|P32588|PUB1_YEAST	P32588	PUB1_YEAST	PUB1	453	Saccharomyces cerevisiae (strain ATCC 204508 / S288c)	Nuclear and cytoplasmic polyadenylated RNA-binding protein PUB1	0	0	1	1
sp|P32803|EMP24_YEAST	P32803	EMP24_YEAST	EMP24	203	Saccharomyces cerevisiae (strain ATCC 204508 / S288c)	Endosomal protein P24B	0	0	1	2
sp|P33892|GCN1_YEAST	P33892	GCN1_YEAST	GCN1	2672	Saccharomyces cerevisiae (strain ATCC 204508 / S288c)	eIF-2-alpha kinase activator GCN1	0	0	1	5
sp|P34110|VPS35_YEAST	P34110	VPS35_YEAST	VPS35	944	Saccharomyces cerevisiae (strain ATCC 204508 / S288c)	Vacuolar protein sorting-associated protein 35	0	0	1	3
sp|P34216|EDE1_YEAST	P34216	EDE1_YEAST	EDE1	1381	Saccharomyces cerevisiae (strain ATCC 204508 / S288c)	EH domain-containing and endocytosis protein 1	0	0	1	1
sp|P35196|RER2_YEAST	P35196	RER2_YEAST	RER2	286	Saccharomyces cerevisiae (strain ATCC 204508 / S288c)	Dehydrodolichyl diphosphate synthase complex subunit RER2	0	0	1	5
sp|P36091|DCW1_YEAST	P36091	DCW1_YEAST	DCW1	449	Saccharomyces cerevisiae (strain ATCC 204508 / S288c)	Mannan endo-1,6-alpha-mannosidase DCW1	0	0	1	5
sp|P38013|AHP1_YEAST	P38013	AHP1_YEAST	AHP1	176	Saccharomyces cerevisiae (strain ATCC 204508 / S288c)	Peroxiredoxin AHP1	0	0	1	1
sp|P38064|RM16_YEAST	P38064	RM16_YEAST	MRPL16	232	Saccharomyces cerevisiae (strain ATCC 204508 / S288c)	Large ribosomal subunit protein uL16m	0	0	1	7
sp|P38122|PANB_YEAST	P38122	PANB_YEAST	ECM31	312	Saccharomyces cerevisiae (strain ATCC 204508 / S288c)	3-methyl-2-oxobutanoate hydroxymethyltransferase	0	0	1	2
sp|P38230|QOR_YEAST	P38230	QOR_YEAST	ZTA1	334	Saccharomyces cerevisiae (strain ATCC 204508 / S288c)	Probable quinone oxidoreductase	0	0	1	15
sp|P38342|TSC10_YEAST	P38342	TSC10_YEAST	TSC10	320	Saccharomyces cerevisiae (strain ATCC 204508 / S288c)	3-ketodihydrosphingosine reductase TSC10	0	0	1	3
sp|P38625|GUAA_YEAST	P38625	GUAA_YEAST	GUA1	525	Saccharomyces cerevisiae (strain ATCC 204508 / S288c)	GMP synthase [glutamine-hydrolyzing]	0	0	1	3
sp|P38720|6PGD1_YEAST	P38720	6PGD1_YEAST	GND1	489	Saccharomyces cerevisiae (strain ATCC 204508 / S288c)	6-phosphogluconate dehydrogenase, decarboxylating 1	0	0	1	1
sp|P38745|YHB7_YEAST	P38745	YHB7_YEAST	YHL017W	532	Saccharomyces cerevisiae (strain ATCC 204508 / S288c)	Uncharacterized membrane protein YHL071W	0	0	1	0
sp|P38775|YHK5_YEAST	P38775	YHK5_YEAST	YHR045W	560	Saccharomyces cerevisiae (strain ATCC 204508 / S288c)	Putative uncharacterized protein YHR045W	0	0	1	3
sp|P38909|CYC2_YEAST	P38909	CYC2_YEAST	CYC2	366	Saccharomyces cerevisiae (strain ATCC 204508 / S288c)	Cytochrome c mitochondrial import factor CYC2	0	0	1	9
sp|P38932|VPS45_YEAST	P38932	VPS45_YEAST	VPS45	577	Saccharomyces cerevisiae (strain ATCC 204508 / S288c)	Vacuolar protein sorting-associated protein 45	0	0	1	0
sp|P38971|ALP1_YEAST	P38971	ALP1_YEAST	ALP1	573	Saccharomyces cerevisiae (strain ATCC 204508 / S288c)	Basic amino-acid permease	0	0	1	3
sp|P39002|LCF3_YEAST	P39002	LCF3_YEAST	FAA3	694	Saccharomyces cerevisiae (strain ATCC 204508 / S288c)	Long-chain-fatty-acid--CoA ligase 3	0	0	1	2
sp|P39008|POP2_YEAST	P39008	POP2_YEAST	POP2	433	Saccharomyces cerevisiae (strain ATCC 204508 / S288c)	Poly(A) ribonuclease POP2	0	0	1	1
sp|P39705|NUP60_YEAST	P39705	NUP60_YEAST	NUP60	539	Saccharomyces cerevisiae (strain ATCC 204508 / S288c)	Nucleoporin NUP60	0	0	1	1
sp|P39718|PEX22_YEAST	P39718	PEX22_YEAST	PEX22	180	Saccharomyces cerevisiae (strain ATCC 204508 / S288c)	Peroxisome assembly protein 22	0	0	1	3
sp|P39727|ERV46_YEAST	P39727	ERV46_YEAST	ERV46	415	Saccharomyces cerevisiae (strain ATCC 204508 / S288c)	ER-derived vesicles protein ERV46	0	0	1	2
sp|P39730|IF2P_YEAST	P39730	IF2P_YEAST	FUN12	1002	Saccharomyces cerevisiae (strain ATCC 204508 / S288c)	Eukaryotic translation initiation factor 5B	0	0	1	6
sp|P39742|SEC72_YEAST	P39742	SEC72_YEAST	SEC72	193	Saccharomyces cerevisiae (strain ATCC 204508 / S288c)	Translocation protein SEC72	0	0	1	2
sp|P40087|DDI1_YEAST	P40087	DDI1_YEAST	DDI1	428	Saccharomyces cerevisiae (strain ATCC 204508 / S288c)	DNA damage-inducible protein 1	0	0	1	2
sp|P40350|ALG5_YEAST	P40350	ALG5_YEAST	ALG5	334	Saccharomyces cerevisiae (strain ATCC 204508 / S288c)	Dolichyl-phosphate beta-glucosyltransferase	0	0	1	7
sp|P40351|ALG8_YEAST	P40351	ALG8_YEAST	ALG8	577	Saccharomyces cerevisiae (strain ATCC 204508 / S288c)	Dolichyl pyrophosphate Glc1Man9GlcNAc2 alpha-1,3-glucosyltransferase	0	0	1	5
sp|P40508|PUP1_YEAST	P40508	PUP1_YEAST	YIL077C	320	Saccharomyces cerevisiae (strain ATCC 204508 / S288c)	PUP1 protein homolog	0	0	1	3
sp|P40530|PDK1_YEAST	P40530	PDK1_YEAST	PKP1	394	Saccharomyces cerevisiae (strain ATCC 204508 / S288c)	[Pyruvate dehydrogenase (acetyl-transferring)] kinase 1, mitochondrial	0	0	1	3
sp|P40557|EPS1_YEAST	P40557	EPS1_YEAST	EPS1	701	Saccharomyces cerevisiae (strain ATCC 204508 / S288c)	ER-retained PMA1-suppressing protein 1	0	0	1	4
sp|P40580|BZRD_YEAST	P40580	BZRD_YEAST	IRC24	263	Saccharomyces cerevisiae (strain ATCC 204508 / S288c)	Benzil reductase ((S)-benzoin forming) IRC24	0	0	1	1
sp|P40857|HACD_YEAST	P40857	HACD_YEAST	PHS1	217	Saccharomyces cerevisiae (strain ATCC 204508 / S288c)	Very-long-chain (3R)-3-hydroxyacyl-CoA dehydratase PHS1	0	0	1	1
sp|P40994|ARF3_YEAST	P40994	ARF3_YEAST	ARF3	183	Saccharomyces cerevisiae (strain ATCC 204508 / S288c)	ADP-ribosylation factor 3	0	0	1	4
sp|P41811|COPB2_YEAST	P41811	COPB2_YEAST	SEC27	889	Saccharomyces cerevisiae (strain ATCC 204508 / S288c)	Coatomer subunit beta'	0	1	1	1
sp|P41834|UFE1_YEAST	P41834	UFE1_YEAST	UFE1	346	Saccharomyces cerevisiae (strain ATCC 204508 / S288c)	Syntaxin UFE1	0	0	1	5
sp|P42840|YN60_YEAST	P42840	YN60_YEAST	YNL320W	284	Saccharomyces cerevisiae (strain ATCC 204508 / S288c)	Uncharacterized membrane protein YNL320W	0	0	1	2
sp|P42951|LSB6_YEAST	P42951	LSB6_YEAST	LSB6	607	Saccharomyces cerevisiae (strain ATCC 204508 / S288c)	Phosphatidylinositol 4-kinase LSB6	0	0	1	8
sp|P43567|AGX1_YEAST	P43567	AGX1_YEAST	AGX1	385	Saccharomyces cerevisiae (strain ATCC 204508 / S288c)	Alanine--glyoxylate aminotransferase 1	0	0	1	20
sp|P43614|KEG1_YEAST	P43614	KEG1_YEAST	KEG1	200	Saccharomyces cerevisiae (strain ATCC 204508 / S288c)	Beta-1,6-glucan synthesis-associated protein KEG1	0	0	1	3
sp|P46655|SYEC_YEAST	P46655	SYEC_YEAST	GUS1	708	Saccharomyces cerevisiae (strain ATCC 204508 / S288c)	Glutamate--tRNA ligase, cytoplasmic	0	2	1	0
sp|P46784|RS10B_YEAST	P46784	RS10B_YEAST	RPS10B	105	Saccharomyces cerevisiae (strain ATCC 204508 / S288c)	Small ribosomal subunit protein eS10B	0	0	1	3
sp|P47042|IKS1_YEAST	P47042	IKS1_YEAST	IKS1	667	Saccharomyces cerevisiae (strain ATCC 204508 / S288c)	Probable serine/threonine-protein kinase IKS1	0	0	1	13
sp|P47047|MTR4_YEAST	P47047	MTR4_YEAST	MTR4	1073	Saccharomyces cerevisiae (strain ATCC 204508 / S288c)	ATP-dependent RNA helicase DOB1	0	0	1	0
sp|P47079|TCPQ_YEAST	P47079	TCPQ_YEAST	CCT8	568	Saccharomyces cerevisiae (strain ATCC 204508 / S288c)	T-complex protein 1 subunit theta	0	0	1	2
sp|P47088|GPI14_YEAST	P47088	GPI14_YEAST	GPI14	403	Saccharomyces cerevisiae (strain ATCC 204508 / S288c)	GPI mannosyltransferase 1	0	0	1	2
sp|P47150|RT07_YEAST	P47150	RT07_YEAST	RSM7	247	Saccharomyces cerevisiae (strain ATCC 204508 / S288c)	Small ribosomal subunit protein uS7m	0	0	1	2
sp|P47159|YJ94_YEAST	P47159	YJ94_YEAST	YJR124C	448	Saccharomyces cerevisiae (strain ATCC 204508 / S288c)	Uncharacterized membrane protein YJR124C	0	0	1	2
sp|P48231|TCB2_YEAST	P48231	TCB2_YEAST	TCB2	1178	Saccharomyces cerevisiae (strain ATCC 204508 / S288c)	Tricalbin-2	0	0	1	3
sp|P48237|CCM1_YEAST	P48237	CCM1_YEAST	CCM1	864	Saccharomyces cerevisiae (strain ATCC 204508 / S288c)	Mitochondrial group I intron splicing factor CCM1	0	0	1	6
sp|P49167|RL38_YEAST	P49167	RL38_YEAST	RPL38	78	Saccharomyces cerevisiae (strain ATCC 204508 / S288c)	Large ribosomal subunit protein eL38	0	0	1	1
sp|P50076|ALG10_YEAST	P50076	ALG10_YEAST	DIE2	525	Saccharomyces cerevisiae (strain ATCC 204508 / S288c)	Dol-P-Glc:Glc(2)Man(9)GlcNAc(2)-PP-Dol alpha-1,2-glucosyltransferase	0	0	1	1
sp|P50108|MNN10_YEAST	P50108	MNN10_YEAST	MNN10	393	Saccharomyces cerevisiae (strain ATCC 204508 / S288c)	Probable alpha-1,6-mannosyltransferase MNN10	0	0	1	3
sp|P52871|SC6B2_YEAST	P52871	SC6B2_YEAST	SBH2	88	Saccharomyces cerevisiae (strain ATCC 204508 / S288c)	Protein transport protein SBH2	0	0	1	4
sp|P53070|MTO1_YEAST	P53070	MTO1_YEAST	MTO1	669	Saccharomyces cerevisiae (strain ATCC 204508 / S288c)	Mitochondrial translation optimization protein 1	0	0	1	3
sp|P53155|YGI2_YEAST	P53155	YGI2_YEAST	YGL082W	381	Saccharomyces cerevisiae (strain ATCC 204508 / S288c)	Uncharacterized protein YGL082W	0	0	1	8
sp|P53253|NNF2_YEAST	P53253	NNF2_YEAST	NNF2	936	Saccharomyces cerevisiae (strain ATCC 204508 / S288c)	Protein NNF2	0	0	1	5
sp|P53324|SAY1_YEAST	P53324	SAY1_YEAST	SAY1	424	Saccharomyces cerevisiae (strain ATCC 204508 / S288c)	Steryl acetyl hydrolase 1	0	0	1	8
sp|P53938|EOS1_YEAST	P53938	EOS1_YEAST	EOS1	366	Saccharomyces cerevisiae (strain ATCC 204508 / S288c)	N-glycosylation protein EOS1	1	0	1	10
sp|P54861|DNM1_YEAST	P54861	DNM1_YEAST	DNM1	757	Saccharomyces cerevisiae (strain ATCC 204508 / S288c)	Dynamin-related protein DNM1	0	0	1	4
sp|P61830|H3_YEAST	P61830	H3_YEAST	HHT1	136	Saccharomyces cerevisiae (strain ATCC 204508 / S288c)	Histone H3	2	9	1	1
sp|Q01560|NOP3_YEAST	Q01560	NOP3_YEAST	NPL3	414	Saccharomyces cerevisiae (strain ATCC 204508 / S288c)	Serine/arginine (SR)-type shuttling mRNA binding protein NPL3	0	0	1	0
sp|Q01896|ATN2_YEAST	Q01896	ATN2_YEAST	ENA2	1091	Saccharomyces cerevisiae (strain ATCC 204508 / S288c)	Sodium/potassium exporting P-type ATPase 2	0	0	1	6
sp|Q02201|OSH6_YEAST	Q02201	OSH6_YEAST	OSH6	448	Saccharomyces cerevisiae (strain ATCC 204508 / S288c)	Oxysterol-binding protein homolog 6	0	0	1	2
sp|Q03370|PEX29_YEAST	Q03370	PEX29_YEAST	PEX29	554	Saccharomyces cerevisiae (strain ATCC 204508 / S288c)	Peroxisomal membrane protein PEX29	0	0	1	2
sp|Q03441|RMD1_YEAST	Q03441	RMD1_YEAST	RMD1	430	Saccharomyces cerevisiae (strain ATCC 204508 / S288c)	Sporulation protein RMD1	0	0	1	7
sp|Q03860|TVP15_YEAST	Q03860	TVP15_YEAST	TVP15	143	Saccharomyces cerevisiae (strain ATCC 204508 / S288c)	Golgi apparatus membrane protein TVP15	0	0	1	1
sp|Q03976|RT24_YEAST	Q03976	RT24_YEAST	RSM24	319	Saccharomyces cerevisiae (strain ATCC 204508 / S288c)	Small ribosomal subunit protein mS35	0	0	1	5
sp|Q04406|EMI1_YEAST	Q04406	EMI1_YEAST	EMI1	187	Saccharomyces cerevisiae (strain ATCC 204508 / S288c)	Early meiotic induction protein 1	0	0	1	2
sp|Q04599|RM01_YEAST	Q04599	RM01_YEAST	MRPL1	285	Saccharomyces cerevisiae (strain ATCC 204508 / S288c)	Large ribosomal subunit protein uL1m	0	0	1	9
sp|Q04958|NTE1_YEAST	Q04958	NTE1_YEAST	NTE1	1679	Saccharomyces cerevisiae (strain ATCC 204508 / S288c)	Lysophospholipase NTE1	0	0	1	5
sp|Q05040|FAR8_YEAST	Q05040	FAR8_YEAST	FAR8	523	Saccharomyces cerevisiae (strain ATCC 204508 / S288c)	Factor arrest protein 8	0	0	1	3
sp|Q05648|MRX10_YEAST	Q05648	MRX10_YEAST	MRX10	414	Saccharomyces cerevisiae (strain ATCC 204508 / S288c)	MIOREX complex component 10	0	0	1	2
sp|Q06170|YL326_YEAST	Q06170	YL326_YEAST	YLR326W	240	Saccharomyces cerevisiae (strain ATCC 204508 / S288c)	Uncharacterized membrane protein YLR326W	0	0	1	1
sp|Q06678|RM35_YEAST	Q06678	RM35_YEAST	MRPL35	367	Saccharomyces cerevisiae (strain ATCC 204508 / S288c)	Large ribosomal subunit protein mL38	0	0	1	4
sp|Q06892|POS5_YEAST	Q06892	POS5_YEAST	POS5	414	Saccharomyces cerevisiae (strain ATCC 204508 / S288c)	NADH kinase POS5, mitochondrial	0	0	1	1
sp|Q07349|MRX9_YEAST	Q07349	MRX9_YEAST	MRX9	420	Saccharomyces cerevisiae (strain ATCC 204508 / S288c)	MIOREX complex component 9	0	0	1	6
sp|Q07914|TIM14_YEAST	Q07914	TIM14_YEAST	PAM18	168	Saccharomyces cerevisiae (strain ATCC 204508 / S288c)	Mitochondrial import inner membrane translocase subunit TIM14	0	0	1	1
sp|Q08109|HRD1_YEAST	Q08109	HRD1_YEAST	HRD1	551	Saccharomyces cerevisiae (strain ATCC 204508 / S288c)	ERAD-associated E3 ubiquitin-protein ligase HRD1	0	0	1	1
sp|Q08144|TLG2_YEAST	Q08144	TLG2_YEAST	TLG2	397	Saccharomyces cerevisiae (strain ATCC 204508 / S288c)	t-SNARE affecting a late Golgi compartment protein 2	0	0	1	3
sp|Q08760|RAX1_YEAST	Q08760	RAX1_YEAST	RAX1	435	Saccharomyces cerevisiae (strain ATCC 204508 / S288c)	Bud site selection protein RAX1	0	0	1	3
sp|Q08965|BMS1_YEAST	Q08965	BMS1_YEAST	BMS1	1183	Saccharomyces cerevisiae (strain ATCC 204508 / S288c)	Ribosome biogenesis protein BMS1	0	0	1	2
sp|Q08967|FLC1_YEAST	Q08967	FLC1_YEAST	FLC1	793	Saccharomyces cerevisiae (strain ATCC 204508 / S288c)	Flavin carrier protein 1	0	0	1	3
sp|Q12031|ACEB_YEAST	Q12031	ACEB_YEAST	ICL2	575	Saccharomyces cerevisiae (strain ATCC 204508 / S288c)	Mitochondrial 2-methylisocitrate lyase ICL2	0	0	1	5
sp|Q12063|UPPS_YEAST	Q12063	UPPS_YEAST	NUS1	375	Saccharomyces cerevisiae (strain ATCC 204508 / S288c)	Dehydrodolichyl diphosphate synthase complex subunit NUS1	0	0	1	6
sp|Q12144|PER33_YEAST	Q12144	PER33_YEAST	PER33	273	Saccharomyces cerevisiae (strain ATCC 204508 / S288c)	Pore and endoplasmic reticulum protein of 33 kDa	0	0	1	1
sp|Q12298|YD061_YEAST	Q12298	YD061_YEAST	YDR061W	539	Saccharomyces cerevisiae (strain ATCC 204508 / S288c)	Uncharacterized ABC transporter ATP-binding protein YDR061W	0	0	1	13
sp|Q12306|SMT3_YEAST	Q12306	SMT3_YEAST	SMT3	101	Saccharomyces cerevisiae (strain ATCC 204508 / S288c)	Ubiquitin-like protein SMT3	0	0	1	3
sp|Q12344|GYP5_YEAST	Q12344	GYP5_YEAST	GYP5	894	Saccharomyces cerevisiae (strain ATCC 204508 / S288c)	GTPase-activating protein GYP5	0	0	1	2
sp|Q12354|APTH1_YEAST	Q12354	APTH1_YEAST	YLR118C	227	Saccharomyces cerevisiae (strain ATCC 204508 / S288c)	Acyl-protein thioesterase 1	0	0	1	2
sp|Q12442|IZH2_YEAST	Q12442	IZH2_YEAST	IZH2	317	Saccharomyces cerevisiae (strain ATCC 204508 / S288c)	ADIPOR-like receptor IZH2	0	0	1	4
sp|Q12451|OSH2_YEAST	Q12451	OSH2_YEAST	OSH2	1283	Saccharomyces cerevisiae (strain ATCC 204508 / S288c)	Oxysterol-binding protein homolog 2	0	0	1	3
sp|Q12460|NOP56_YEAST	Q12460	NOP56_YEAST	NOP56	504	Saccharomyces cerevisiae (strain ATCC 204508 / S288c)	Nucleolar protein 56	0	0	1	1
sp|Q2V2P4|YI156_YEAST	Q2V2P4	YI156_YEAST	YIL156W-B	73	Saccharomyces cerevisiae (strain ATCC 204508 / S288c)	Uncharacterized protein YIL156W-B	0	0	1	1
sp|Q2V2P9|COX26_YEAST	Q2V2P9	COX26_YEAST	COX26	66	Saccharomyces cerevisiae (strain ATCC 204508 / S288c)	Cytochrome c oxidase subunit 26, mitochondrial	3	1	1	1
sp|Q3E6R5|YD381_YEAST	Q3E6R5	YD381_YEAST	YDR381C-A	114	Saccharomyces cerevisiae (strain ATCC 204508 / S288c)	Uncharacterized mitochondrial outer membrane protein YDR381C-A	0	0	1	5
sp|Q3E756|YB029_YEAST	Q3E756	YB029_YEAST	YBL029C-A	94	Saccharomyces cerevisiae (strain ATCC 204508 / S288c)	UPF0768 protein YBL029C-A	0	0	1	1
sp|Q3E776|YB255_YEAST	Q3E776	YB255_YEAST	YBR255C-A	120	Saccharomyces cerevisiae (strain ATCC 204508 / S288c)	Uncharacterized protein YBR255C-A	0	0	1	2
sp|Q3E790|TSC3_YEAST	Q3E790	TSC3_YEAST	TSC3	80	Saccharomyces cerevisiae (strain ATCC 204508 / S288c)	Serine palmitoyltransferase-regulating protein TSC3	0	0	1	5
sp|Q3E798|MIM2_YEAST	Q3E798	MIM2_YEAST	MIM2	87	Saccharomyces cerevisiae (strain ATCC 204508 / S288c)	Mitochondrial import protein 2	0	0	1	3
sp|Q8TGU7|YB126_YEAST	Q8TGU7	YB126_YEAST	YBR126W-A	68	Saccharomyces cerevisiae (strain ATCC 204508 / S288c)	Uncharacterized protein YBR126W-A	0	0	1	4
sp|Q99260|YPT6_YEAST	Q99260	YPT6_YEAST	YPT6	215	Saccharomyces cerevisiae (strain ATCC 204508 / S288c)	GTP-binding protein YPT6	0	0	1	2
sp|Q99325|ATG40_YEAST	Q99325	ATG40_YEAST	ATG40	256	Saccharomyces cerevisiae (strain ATCC 204508 / S288c)	Autophagy-related protein 40	0	0	1	9
sp|Q99382|ENV10_YEAST	Q99382	ENV10_YEAST	ENV10	181	Saccharomyces cerevisiae (strain ATCC 204508 / S288c)	SRP-independent targeting protein 2	0	0	1	5
tr|A6ZUY5|A6ZUY5_YEAS7	A6ZUY5	A6ZUY5_YEAS7	PMA1	918	Saccharomyces cerevisiae (strain YJM789)	Plasma membrane ATPase	0	0	1	0
tr|A6ZY59|A6ZY59_YEAS7	A6ZY59	A6ZY59_YEAS7	DNF2	1450	Saccharomyces cerevisiae (strain YJM789)	Phospholipid-transporting ATPase	0	0	1	4
sp|A6ZKM2|GATB_YEAS7	A6ZKM2	GATB_YEAS7	PET112	541	Saccharomyces cerevisiae (strain YJM789)	Glutamyl-tRNA(Gln) amidotransferase subunit B, mitochondrial	0	0	0	2
sp|A6ZLF4|SDS24_YEAS7	A6ZLF4	SDS24_YEAS7	SDS24	527	Saccharomyces cerevisiae (strain YJM789)	Protein SDS24	0	0	0	5
sp|A6ZM65|AIM34_YEAS7	A6ZM65	AIM34_YEAS7	AIM34	198	Saccharomyces cerevisiae (strain YJM789)	Altered inheritance of mitochondria protein 34, mitochondrial	0	0	0	2
sp|A6ZMC3|AEP1_YEAS7	A6ZMC3	AEP1_YEAS7	AEP1	518	Saccharomyces cerevisiae (strain YJM789)	ATPase expression protein 1, mitochondrial	0	0	0	2
sp|A6ZMG6|MYO5_YEAS7	A6ZMG6	MYO5_YEAS7	MYO5	1219	Saccharomyces cerevisiae (strain YJM789)	Myosin-5	0	0	0	3
sp|A6ZMK7|OSW5_YEAS7	A6ZMK7	OSW5_YEAS7	OSW5	148	Saccharomyces cerevisiae (strain YJM789)	Outer spore wall protein 5	0	0	0	1
sp|A6ZN26|EIF3C_YEAS7	A6ZN26	EIF3C_YEAS7	NIP1	812	Saccharomyces cerevisiae (strain YJM789)	Eukaryotic translation initiation factor 3 subunit C	0	0	0	1
sp|A6ZPQ9|COA3_YEAS7	A6ZPQ9	COA3_YEAS7	COA3	85	Saccharomyces cerevisiae (strain YJM789)	Cytochrome c oxidase assembly factor 3, mitochondrial	0	0	0	10
sp|A6ZUA1|DBP3_YEAS7	A6ZUA1	DBP3_YEAS7	DBP3	523	Saccharomyces cerevisiae (strain YJM789)	ATP-dependent RNA helicase DBP3	0	0	0	1
sp|A6ZUA4|MPS2_YEAS7	A6ZUA4	MPS2_YEAS7	MPS2	387	Saccharomyces cerevisiae (strain YJM789)	Monopolar spindle protein 2	0	0	0	1
sp|A6ZYZ4|SHE9_YEAS7	A6ZYZ4	SHE9_YEAS7	SHE9	456	Saccharomyces cerevisiae (strain YJM789)	Sensitive to high expression protein 9, mitochondrial	0	0	0	2
sp|A6ZZJ1|MYO3_YEAS7	A6ZZJ1	MYO3_YEAS7	MYO3	1270	Saccharomyces cerevisiae (strain YJM789)	Myosin-3	0	0	0	1
sp|A6ZZJ6|SSH4_YEAS7	A6ZZJ6	SSH4_YEAS7	SSH4	579	Saccharomyces cerevisiae (strain YJM789)	Protein SSH4	0	0	0	3
sp|A7A082|EMC3_YEAS7	A7A082	EMC3_YEAS7	AIM27	253	Saccharomyces cerevisiae (strain YJM789)	ER membrane protein complex subunit 3	0	0	0	5
sp|D6VTK4|STE2_YEAST	D6VTK4	STE2_YEAST	STE2	431	Saccharomyces cerevisiae (strain ATCC 204508 / S288c)	Pheromone alpha factor receptor	0	0	0	4
sp|P00358|G3P2_YEAST	P00358	G3P2_YEAST	TDH2	332	Saccharomyces cerevisiae (strain ATCC 204508 / S288c)	Glyceraldehyde-3-phosphate dehydrogenase 2	0	0	0	3
sp|P00729|CBPY_YEAST	P00729	CBPY_YEAST	PRC1	532	Saccharomyces cerevisiae (strain ATCC 204508 / S288c)	Carboxypeptidase Y	0	0	0	1
sp|P00817|IPYR_YEAST	P00817	IPYR_YEAST	IPP1	287	Saccharomyces cerevisiae (strain ATCC 204508 / S288c)	Inorganic pyrophosphatase	0	0	0	5
sp|P01119|RAS1_YEAST	P01119	RAS1_YEAST	RAS1	309	Saccharomyces cerevisiae (strain ATCC 204508 / S288c)	Ras-like protein 1	0	0	0	3
sp|P02400|RLA4_YEAST	P02400	RLA4_YEAST	RPP2B	110	Saccharomyces cerevisiae (strain ATCC 204508 / S288c)	Large ribosomal subunit protein P2B	0	0	0	1
sp|P02557|TBB_YEAST	P02557	TBB_YEAST	TUB2	457	Saccharomyces cerevisiae (strain ATCC 204508 / S288c)	Tubulin beta chain	0	0	0	2
sp|P03874|CBP2_YEAST	P03874	CBP2_YEAST	CBP2	630	Saccharomyces cerevisiae (strain ATCC 204508 / S288c)	Cytochrome B pre-mRNA-processing protein 2	0	0	0	2
sp|P03965|CARB_YEAST	P03965	CARB_YEAST	CPA2	1118	Saccharomyces cerevisiae (strain ATCC 204508 / S288c)	Carbamoyl-phosphate synthase arginine-specific large chain	0	0	0	4
sp|P04801|SYTC_YEAST	P04801	SYTC_YEAST	THS1	734	Saccharomyces cerevisiae (strain ATCC 204508 / S288c)	Threonine--tRNA ligase, cytoplasmic	0	0	0	1
sp|P05744|RL33A_YEAST	P05744	RL33A_YEAST	RPL33A	107	Saccharomyces cerevisiae (strain ATCC 204508 / S288c)	Large ribosomal subunit protein eL33A	0	4	0	0
sp|P06738|PHSG_YEAST	P06738	PHSG_YEAST	GPH1	902	Saccharomyces cerevisiae (strain ATCC 204508 / S288c)	Glycogen phosphorylase	0	0	0	2
sp|P06775|HIP1_YEAST	P06775	HIP1_YEAST	HIP1	603	Saccharomyces cerevisiae (strain ATCC 204508 / S288c)	Histidine permease	0	0	0	2
sp|P07236|SYTM_YEAST	P07236	SYTM_YEAST	MST1	462	Saccharomyces cerevisiae (strain ATCC 204508 / S288c)	Threonine--tRNA ligase, mitochondrial	0	0	0	3
sp|P07278|KAPR_YEAST	P07278	KAPR_YEAST	BCY1	416	Saccharomyces cerevisiae (strain ATCC 204508 / S288c)	cAMP-dependent protein kinase regulatory subunit	0	0	0	8
sp|P07283|PMM_YEAST	P07283	PMM_YEAST	SEC53	254	Saccharomyces cerevisiae (strain ATCC 204508 / S288c)	Phosphomannomutase	0	0	0	2
sp|P07284|SYSC_YEAST	P07284	SYSC_YEAST	SES1	462	Saccharomyces cerevisiae (strain ATCC 204508 / S288c)	Serine--tRNA ligase, cytoplasmic	0	0	0	2
sp|P09201|F16P_YEAST	P09201	F16P_YEAST	FBP1	348	Saccharomyces cerevisiae (strain ATCC 204508 / S288c)	Fructose-1,6-bisphosphatase	0	0	0	1
sp|P09435|HSP73_YEAST	P09435	HSP73_YEAST	SSA3	649	Saccharomyces cerevisiae (strain ATCC 204508 / S288c)	Heat shock protein SSA3	1	0	0	3
sp|P0C268|YB39B_YEAST	P0C268	YB39B_YEAST	YBL039W-B	59	Saccharomyces cerevisiae (strain ATCC 204508 / S288c)	Uncharacterized protein YBL039W-B	0	0	0	6
sp|P0CX12|COS2_YEAST	P0CX12	COS2_YEAST	COS2	379	Saccharomyces cerevisiae (strain ATCC 204508 / S288c)	Protein COS2	0	0	0	2
sp|P0CX33|RS30A_YEAST	P0CX33	RS30A_YEAST	RPS30A	63	Saccharomyces cerevisiae (strain ATCC 204508 / S288c)	Small ribosomal subunit protein eS30A	0	3	0	0
sp|P14832|CYPH_YEAST	P14832	CYPH_YEAST	CPR1	162	Saccharomyces cerevisiae (strain ATCC 204508 / S288c)	Peptidyl-prolyl cis-trans isomerase	0	0	0	2
sp|P15179|SYDM_YEAST	P15179	SYDM_YEAST	MSD1	658	Saccharomyces cerevisiae (strain ATCC 204508 / S288c)	Aspartate--tRNA ligase, mitochondrial	0	0	0	2
sp|P15202|CATA_YEAST	P15202	CATA_YEAST	CTA1	515	Saccharomyces cerevisiae (strain ATCC 204508 / S288c)	Peroxisomal catalase A	0	0	0	2
sp|P15646|FBRL_YEAST	P15646	FBRL_YEAST	NOP1	327	Saccharomyces cerevisiae (strain ATCC 204508 / S288c)	rRNA 2'-O-methyltransferase fibrillarin	0	0	0	1
sp|P15703|BGL2_YEAST	P15703	BGL2_YEAST	BGL2	313	Saccharomyces cerevisiae (strain ATCC 204508 / S288c)	Glucan 1,3-beta-glucosidase	0	0	0	1
sp|P15891|ABP1_YEAST	P15891	ABP1_YEAST	ABP1	592	Saccharomyces cerevisiae (strain ATCC 204508 / S288c)	Actin-binding protein	0	0	0	1
sp|P16550|APA1_YEAST	P16550	APA1_YEAST	APA1	321	Saccharomyces cerevisiae (strain ATCC 204508 / S288c)	Protein APA1	0	0	0	1
sp|P17558|RTPT_YEAST	P17558	RTPT_YEAST	PET123	318	Saccharomyces cerevisiae (strain ATCC 204508 / S288c)	Small ribosomal subunit protein mS26	0	0	0	1
sp|P18963|IRA1_YEAST	P18963	IRA1_YEAST	IRA1	3092	Saccharomyces cerevisiae (strain ATCC 204508 / S288c)	Inhibitory regulator protein IRA1	0	0	0	2
sp|P19956|RM44_YEAST	P19956	RM44_YEAST	MRPL44	98	Saccharomyces cerevisiae (strain ATCC 204508 / S288c)	Large ribosomal subunit protein mL53	0	0	0	5
sp|P20459|IF2A_YEAST	P20459	IF2A_YEAST	SUI2	304	Saccharomyces cerevisiae (strain ATCC 204508 / S288c)	Eukaryotic translation initiation factor 2 subunit alpha	0	0	0	5
sp|P22133|MDHC_YEAST	P22133	MDHC_YEAST	MDH2	377	Saccharomyces cerevisiae (strain ATCC 204508 / S288c)	Malate dehydrogenase, cytoplasmic	0	0	0	5
sp|P23301|IF5A1_YEAST	P23301	IF5A1_YEAST	HYP2	157	Saccharomyces cerevisiae (strain ATCC 204508 / S288c)	Eukaryotic translation initiation factor 5A-1	0	0	0	2
sp|P24720|MNE1_YEAST	P24720	MNE1_YEAST	MNE1	663	Saccharomyces cerevisiae (strain ATCC 204508 / S288c)	Protein MNE1	0	0	0	4
sp|P25270|MRM1_YEAST	P25270	MRM1_YEAST	MRM1	412	Saccharomyces cerevisiae (strain ATCC 204508 / S288c)	rRNA methyltransferase 1, mitochondrial	0	0	0	4
sp|P25334|CYPR_YEAST	P25334	CYPR_YEAST	CPR4	318	Saccharomyces cerevisiae (strain ATCC 204508 / S288c)	Peptidyl-prolyl cis-trans isomerase CPR4	0	0	0	2
sp|P25339|PUF4_YEAST	P25339	PUF4_YEAST	PUF4	888	Saccharomyces cerevisiae (strain ATCC 204508 / S288c)	Pumilio homology domain family member 4	0	0	0	1
sp|P25345|SYNM_YEAST	P25345	SYNM_YEAST	SLM5	492	Saccharomyces cerevisiae (strain ATCC 204508 / S288c)	Asparagine--tRNA ligase, mitochondrial	0	0	0	2
sp|P25360|PHO87_YEAST	P25360	PHO87_YEAST	PHO87	923	Saccharomyces cerevisiae (strain ATCC 204508 / S288c)	Inorganic phosphate transporter PHO87	0	0	0	1
sp|P25375|PRTD_YEAST	P25375	PRTD_YEAST	PRD1	712	Saccharomyces cerevisiae (strain ATCC 204508 / S288c)	Saccharolysin	0	0	0	13
sp|P25385|BOS1_YEAST	P25385	BOS1_YEAST	BOS1	244	Saccharomyces cerevisiae (strain ATCC 204508 / S288c)	Protein transport protein BOS1	0	0	0	2
sp|P25625|PER1_YEAST	P25625	PER1_YEAST	PER1	357	Saccharomyces cerevisiae (strain ATCC 204508 / S288c)	Protein PER1	0	0	0	3
sp|P25655|NOT1_YEAST	P25655	NOT1_YEAST	CDC39	2108	Saccharomyces cerevisiae (strain ATCC 204508 / S288c)	General negative regulator of transcription subunit 1	0	0	0	6
sp|P26570|PPZ1_YEAST	P26570	PPZ1_YEAST	PPZ1	692	Saccharomyces cerevisiae (strain ATCC 204508 / S288c)	Serine/threonine-protein phosphatase PP-Z1	0	0	0	1
sp|P27472|GYS2_YEAST	P27472	GYS2_YEAST	GSY2	705	Saccharomyces cerevisiae (strain ATCC 204508 / S288c)	Glycogen [starch] synthase isoform 2	0	0	0	3
sp|P27614|CBPS_YEAST	P27614	CBPS_YEAST	CPS1	576	Saccharomyces cerevisiae (strain ATCC 204508 / S288c)	Carboxypeptidase S	0	0	0	4
sp|P29453|RL8B_YEAST	P29453	RL8B_YEAST	RPL8B	256	Saccharomyces cerevisiae (strain ATCC 204508 / S288c)	Large ribosomal subunit protein eL8B	0	0	0	1
sp|P29547|EF1G1_YEAST	P29547	EF1G1_YEAST	CAM1	415	Saccharomyces cerevisiae (strain ATCC 204508 / S288c)	Elongation factor 1-gamma 1	0	0	0	1
sp|P30775|RF1M_YEAST	P30775	RF1M_YEAST	MRF1	413	Saccharomyces cerevisiae (strain ATCC 204508 / S288c)	Peptide chain release factor 1, mitochondrial	0	0	0	3
sp|P32327|PYC2_YEAST	P32327	PYC2_YEAST	PYC2	1180	Saccharomyces cerevisiae (strain ATCC 204508 / S288c)	Pyruvate carboxylase 2	2	5	0	1
sp|P32341|VPH2_YEAST	P32341	VPH2_YEAST	VPH2	215	Saccharomyces cerevisiae (strain ATCC 204508 / S288c)	Vacuolar ATPase assembly integral membrane protein VPH2	0	0	0	4
sp|P32356|TREA_YEAST	P32356	TREA_YEAST	NTH1	751	Saccharomyces cerevisiae (strain ATCC 204508 / S288c)	Cytosolic neutral trehalase	0	0	0	1
sp|P32600|TOR2_YEAST	P32600	TOR2_YEAST	TOR2	2474	Saccharomyces cerevisiae (strain ATCC 204508 / S288c)	Serine/threonine-protein kinase TOR2	0	0	0	2
sp|P32642|GLRX4_YEAST	P32642	GLRX4_YEAST	GRX4	244	Saccharomyces cerevisiae (strain ATCC 204508 / S288c)	Monothiol glutaredoxin-4	0	0	0	4
sp|P32657|CHD1_YEAST	P32657	CHD1_YEAST	CHD1	1468	Saccharomyces cerevisiae (strain ATCC 204508 / S288c)	Chromo domain-containing protein 1	0	0	0	3
sp|P33296|UBC6_YEAST	P33296	UBC6_YEAST	UBC6	250	Saccharomyces cerevisiae (strain ATCC 204508 / S288c)	Ubiquitin-conjugating enzyme E2 6	0	0	0	3
sp|P33309|DOM34_YEAST	P33309	DOM34_YEAST	DOM34	386	Saccharomyces cerevisiae (strain ATCC 204508 / S288c)	Protein DOM34	0	0	0	3
sp|P35735|SFK1_YEAST	P35735	SFK1_YEAST	SFK1	353	Saccharomyces cerevisiae (strain ATCC 204508 / S288c)	Protein SFK1	0	0	0	2
sp|P35844|KES1_YEAST	P35844	KES1_YEAST	KES1	434	Saccharomyces cerevisiae (strain ATCC 204508 / S288c)	Oxysterol-binding protein homolog 4	0	0	0	4
sp|P36027|MID2_YEAST	P36027	MID2_YEAST	MID2	376	Saccharomyces cerevisiae (strain ATCC 204508 / S288c)	Cell wall integrity sensor MID2	0	0	0	2
sp|P36520|RM10_YEAST	P36520	RM10_YEAST	MRPL10	322	Saccharomyces cerevisiae (strain ATCC 204508 / S288c)	Large ribosomal subunit protein uL15m	0	9	0	4
sp|P36526|RM27_YEAST	P36526	RM27_YEAST	MRPL27	146	Saccharomyces cerevisiae (strain ATCC 204508 / S288c)	Large ribosomal subunit protein mL41	0	0	0	2
sp|P37020|GEF1_YEAST	P37020	GEF1_YEAST	GEF1	779	Saccharomyces cerevisiae (strain ATCC 204508 / S288c)	Anion/proton exchange transporter GEF1	0	0	0	5
sp|P37302|APE3_YEAST	P37302	APE3_YEAST	APE3	537	Saccharomyces cerevisiae (strain ATCC 204508 / S288c)	Aminopeptidase Y	0	0	0	4
sp|P38088|SYG_YEAST	P38088	SYG_YEAST	GRS1	690	Saccharomyces cerevisiae (strain ATCC 204508 / S288c)	Glycine--tRNA ligase 1, mitochondrial	0	0	0	8
sp|P38130|KTR3_YEAST	P38130	KTR3_YEAST	KTR3	404	Saccharomyces cerevisiae (strain ATCC 204508 / S288c)	Probable mannosyltransferase KTR3	0	0	0	5
sp|P38143|GPX2_YEAST	P38143	GPX2_YEAST	GPX2	162	Saccharomyces cerevisiae (strain ATCC 204508 / S288c)	Glutathione peroxidase-like peroxiredoxin 2	0	0	0	1
sp|P38179|ALG3_YEAST	P38179	ALG3_YEAST	ALG3	458	Saccharomyces cerevisiae (strain ATCC 204508 / S288c)	Dol-P-Man:Man(5)GlcNAc(2)-PP-Dol alpha-1,3-mannosyltransferase	0	0	0	5
sp|P38196|FUI1_YEAST	P38196	FUI1_YEAST	FUI1	639	Saccharomyces cerevisiae (strain ATCC 204508 / S288c)	Uridine permease	0	0	0	3
sp|P38211|GPI18_YEAST	P38211	GPI18_YEAST	GPI18	433	Saccharomyces cerevisiae (strain ATCC 204508 / S288c)	GPI mannosyltransferase 2	0	0	0	1
sp|P38217|IMB2_YEAST	P38217	IMB2_YEAST	KAP104	918	Saccharomyces cerevisiae (strain ATCC 204508 / S288c)	Importin subunit beta-2	0	0	0	1
sp|P38318|YB70_YEAST	P38318	YB70_YEAST	YBR220C	560	Saccharomyces cerevisiae (strain ATCC 204508 / S288c)	Uncharacterized membrane protein YBR220C	0	0	0	2
sp|P38623|RCK2_YEAST	P38623	RCK2_YEAST	RCK2	610	Saccharomyces cerevisiae (strain ATCC 204508 / S288c)	Serine/threonine-protein kinase RCK2	0	0	0	1
sp|P38702|LEU5_YEAST	P38702	LEU5_YEAST	LEU5	357	Saccharomyces cerevisiae (strain ATCC 204508 / S288c)	Mitochondrial carrier protein LEU5	0	0	0	6
sp|P38746|YLF2_YEAST	P38746	YLF2_YEAST	YLF2	405	Saccharomyces cerevisiae (strain ATCC 204508 / S288c)	Obg-like ATPase homolog	0	0	0	2
sp|P38778|SMF2_YEAST	P38778	SMF2_YEAST	SMF2	549	Saccharomyces cerevisiae (strain ATCC 204508 / S288c)	Manganese transporter SMF2	0	0	0	1
sp|P38809|YHP7_YEAST	P38809	YHP7_YEAST	YHR097C	366	Saccharomyces cerevisiae (strain ATCC 204508 / S288c)	Uncharacterized protein YHR097C	0	0	0	5
sp|P38880|MDM31_YEAST	P38880	MDM31_YEAST	MDM31	579	Saccharomyces cerevisiae (strain ATCC 204508 / S288c)	Mitochondrial distribution and morphology protein 31	0	0	0	4
sp|P38910|CH10_YEAST	P38910	CH10_YEAST	HSP10	106	Saccharomyces cerevisiae (strain ATCC 204508 / S288c)	10 kDa heat shock protein, mitochondrial	2	0	0	0
sp|P38959|VPS41_YEAST	P38959	VPS41_YEAST	VPS41	992	Saccharomyces cerevisiae (strain ATCC 204508 / S288c)	Vacuolar protein sorting-associated protein 41	0	0	0	6
sp|P38969|PNT1_YEAST	P38969	PNT1_YEAST	PNT1	423	Saccharomyces cerevisiae (strain ATCC 204508 / S288c)	Pentamidine resistance factor, mitochondrial	0	0	0	6
sp|P38992|SUR2_YEAST	P38992	SUR2_YEAST	SUR2	349	Saccharomyces cerevisiae (strain ATCC 204508 / S288c)	Sphingolipid C4-hydroxylase SUR2	0	0	0	4
sp|P39078|TCPD_YEAST	P39078	TCPD_YEAST	CCT4	528	Saccharomyces cerevisiae (strain ATCC 204508 / S288c)	T-complex protein 1 subunit delta	0	0	0	1
sp|P39105|PLB1_YEAST	P39105	PLB1_YEAST	PLB1	664	Saccharomyces cerevisiae (strain ATCC 204508 / S288c)	Lysophospholipase 1	0	0	0	4
sp|P39525|CEM1_YEAST	P39525	CEM1_YEAST	CEM1	442	Saccharomyces cerevisiae (strain ATCC 204508 / S288c)	3-oxoacyl-[acyl-carrier-protein] synthase homolog	0	0	0	1
sp|P39702|VPS8_YEAST	P39702	VPS8_YEAST	VPS8	1274	Saccharomyces cerevisiae (strain ATCC 204508 / S288c)	Vacuolar protein sorting-associated protein 8	0	0	0	4
sp|P39726|GCSH_YEAST	P39726	GCSH_YEAST	GCV3	170	Saccharomyces cerevisiae (strain ATCC 204508 / S288c)	Glycine cleavage system H protein, mitochondrial	0	0	0	5
sp|P39743|RV167_YEAST	P39743	RV167_YEAST	RVS167	482	Saccharomyces cerevisiae (strain ATCC 204508 / S288c)	Reduced viability upon starvation protein 167	0	0	0	1
sp|P39958|GDI1_YEAST	P39958	GDI1_YEAST	GDI1	451	Saccharomyces cerevisiae (strain ATCC 204508 / S288c)	Rab GDP-dissociation inhibitor	0	0	0	1
sp|P39965|SYPM_YEAST	P39965	SYPM_YEAST	AIM10	576	Saccharomyces cerevisiae (strain ATCC 204508 / S288c)	Probable proline--tRNA ligase, mitochondrial	0	0	0	1
sp|P40002|MIT1_YEAST	P40002	MIT1_YEAST	MIT1	666	Saccharomyces cerevisiae (strain ATCC 204508 / S288c)	Transcriptional regulator MIT1	0	0	0	2
sp|P40016|RPN3_YEAST	P40016	RPN3_YEAST	RPN3	523	Saccharomyces cerevisiae (strain ATCC 204508 / S288c)	26S proteasome regulatory subunit RPN3	0	0	0	4
sp|P40071|TMN3_YEAST	P40071	TMN3_YEAST	TMN3	706	Saccharomyces cerevisiae (strain ATCC 204508 / S288c)	Transmembrane 9 superfamily member 3	0	0	0	2
sp|P40165|NNRE_YEAST	P40165	NNRE_YEAST	NNR1	246	Saccharomyces cerevisiae (strain ATCC 204508 / S288c)	NAD(P)H-hydrate epimerase	0	0	0	8
sp|P40207|ERG29_YEAST	P40207	ERG29_YEAST	ERG29	237	Saccharomyces cerevisiae (strain ATCC 204508 / S288c)	Ergosterol biosynthesis protein 29	0	0	0	5
sp|P40218|YM24_YEAST	P40218	YM24_YEAST	YMR147W	223	Saccharomyces cerevisiae (strain ATCC 204508 / S288c)	Uncharacterized protein YMR147W	0	0	0	2
sp|P40260|MEP1_YEAST	P40260	MEP1_YEAST	MEP1	492	Saccharomyces cerevisiae (strain ATCC 204508 / S288c)	Ammonium transporter MEP1	0	0	0	2
sp|P40308|TGL3_YEAST	P40308	TGL3_YEAST	TGL3	642	Saccharomyces cerevisiae (strain ATCC 204508 / S288c)	Triacylglycerol lipase 3	0	0	0	4
sp|P40309|KHA1_YEAST	P40309	KHA1_YEAST	KHA1	873	Saccharomyces cerevisiae (strain ATCC 204508 / S288c)	K(+)/H(+) antiporter 1	0	0	0	2
sp|P40345|PDAT_YEAST	P40345	PDAT_YEAST	LRO1	661	Saccharomyces cerevisiae (strain ATCC 204508 / S288c)	Phospholipid:diacylglycerol acyltransferase	0	0	0	6
sp|P40452|COA1_YEAST	P40452	COA1_YEAST	COA1	197	Saccharomyces cerevisiae (strain ATCC 204508 / S288c)	Cytochrome c oxidase assembly factor 1	0	0	0	2
sp|P40457|MLP2_YEAST	P40457	MLP2_YEAST	MLP2	1679	Saccharomyces cerevisiae (strain ATCC 204508 / S288c)	Protein MLP2	0	0	0	1
sp|P40462|TM108_YEAST	P40462	TM108_YEAST	TMA108	946	Saccharomyces cerevisiae (strain ATCC 204508 / S288c)	Protein TMA108	0	0	0	8
sp|P40478|VDAC2_YEAST	P40478	VDAC2_YEAST	POR2	281	Saccharomyces cerevisiae (strain ATCC 204508 / S288c)	Mitochondrial outer membrane protein porin 2	0	0	0	4
sp|P40485|SLM1_YEAST	P40485	SLM1_YEAST	SLM1	686	Saccharomyces cerevisiae (strain ATCC 204508 / S288c)	Phosphatidylinositol 4,5-bisphosphate-binding protein SLM1	0	0	0	3
sp|P40502|AIM19_YEAST	P40502	AIM19_YEAST	AIM19	157	Saccharomyces cerevisiae (strain ATCC 204508 / S288c)	Altered inheritance of mitochondria protein 19, mitochondrial	0	0	0	1
sp|P40532|APQ12_YEAST	P40532	APQ12_YEAST	APQ12	138	Saccharomyces cerevisiae (strain ATCC 204508 / S288c)	Nuclear membrane organization protein APQ12	0	0	0	3
sp|P40564|DJP1_YEAST	P40564	DJP1_YEAST	DJP1	432	Saccharomyces cerevisiae (strain ATCC 204508 / S288c)	DnaJ-like protein 1	0	0	0	3
sp|P40986|CDC1_YEAST	P40986	CDC1_YEAST	CDC1	491	Saccharomyces cerevisiae (strain ATCC 204508 / S288c)	Cell division control protein 1	0	0	0	2
sp|P41921|GSHR_YEAST	P41921	GSHR_YEAST	GLR1	483	Saccharomyces cerevisiae (strain ATCC 204508 / S288c)	Glutathione reductase	0	0	0	2
sp|P41939|IDHC_YEAST	P41939	IDHC_YEAST	IDP2	412	Saccharomyces cerevisiae (strain ATCC 204508 / S288c)	Isocitrate dehydrogenase [NADP] cytoplasmic	0	0	0	4
sp|P42900|SLS1_YEAST	P42900	SLS1_YEAST	SLS1	643	Saccharomyces cerevisiae (strain ATCC 204508 / S288c)	Sigma-like sequence protein 1, mitochondrial	0	0	0	3
sp|P42943|TCPH_YEAST	P42943	TCPH_YEAST	CCT7	550	Saccharomyces cerevisiae (strain ATCC 204508 / S288c)	T-complex protein 1 subunit eta	0	0	0	4
sp|P43570|GYP8_YEAST	P43570	GYP8_YEAST	GYP8	497	Saccharomyces cerevisiae (strain ATCC 204508 / S288c)	GTPase-activating protein GYP8	0	0	0	6
sp|P43571|BST1_YEAST	P43571	BST1_YEAST	BST1	1029	Saccharomyces cerevisiae (strain ATCC 204508 / S288c)	GPI inositol-deacylase	0	0	0	1
sp|P43590|YFH6_YEAST	P43590	YFH6_YEAST	YFR006W	535	Saccharomyces cerevisiae (strain ATCC 204508 / S288c)	Uncharacterized peptidase YFR006W	0	0	0	9
sp|P43593|UBP6_YEAST	P43593	UBP6_YEAST	UBP6	499	Saccharomyces cerevisiae (strain ATCC 204508 / S288c)	Ubiquitin carboxyl-terminal hydrolase 6	0	0	0	2
sp|P43616|DUG1_YEAST	P43616	DUG1_YEAST	DUG1	481	Saccharomyces cerevisiae (strain ATCC 204508 / S288c)	Cys-Gly metallodipeptidase DUG1	0	0	0	2
sp|P43638|MHP1_YEAST	P43638	MHP1_YEAST	MHP1	1398	Saccharomyces cerevisiae (strain ATCC 204508 / S288c)	MAP-homologous protein 1	0	0	0	6
sp|P46669|RPA43_YEAST	P46669	RPA43_YEAST	RPA43	326	Saccharomyces cerevisiae (strain ATCC 204508 / S288c)	DNA-directed RNA polymerase I subunit RPA43	1	1	0	0
sp|P46961|GPI2_YEAST	P46961	GPI2_YEAST	GPI2	280	Saccharomyces cerevisiae (strain ATCC 204508 / S288c)	Phosphatidylinositol N-acetylglucosaminyltransferase GPI2 subunit	0	0	0	2
sp|P46985|MNN11_YEAST	P46985	MNN11_YEAST	MNN11	422	Saccharomyces cerevisiae (strain ATCC 204508 / S288c)	Probable alpha-1,6-mannosyltransferase MNN11	0	0	0	4
sp|P47026|GWT1_YEAST	P47026	GWT1_YEAST	GWT1	490	Saccharomyces cerevisiae (strain ATCC 204508 / S288c)	GPI-anchored wall transfer protein 1	0	0	0	1
sp|P47057|SNX4_YEAST	P47057	SNX4_YEAST	SNX4	423	Saccharomyces cerevisiae (strain ATCC 204508 / S288c)	Sorting nexin-4	0	0	0	2
sp|P47124|HOC1_YEAST	P47124	HOC1_YEAST	HOC1	396	Saccharomyces cerevisiae (strain ATCC 204508 / S288c)	Putative glycosyltransferase HOC1	0	0	0	3
sp|P48360|ADRO_YEAST	P48360	ADRO_YEAST	ARH1	493	Saccharomyces cerevisiae (strain ATCC 204508 / S288c)	Probable NADPH:adrenodoxin oxidoreductase, mitochondrial	0	0	0	3
sp|P48365|GYP7_YEAST	P48365	GYP7_YEAST	GYP7	746	Saccharomyces cerevisiae (strain ATCC 204508 / S288c)	GTPase-activating protein GYP7	0	0	0	1
sp|P48582|BRO1_YEAST	P48582	BRO1_YEAST	BRO1	844	Saccharomyces cerevisiae (strain ATCC 204508 / S288c)	Vacuolar-sorting protein BRO1	0	0	0	2
sp|P49723|RIR4_YEAST	P49723	RIR4_YEAST	RNR4	345	Saccharomyces cerevisiae (strain ATCC 204508 / S288c)	Ribonucleoside-diphosphate reductase small chain 2	0	0	0	3
sp|P53012|SCS3_YEAST	P53012	SCS3_YEAST	SCS3	380	Saccharomyces cerevisiae (strain ATCC 204508 / S288c)	Acyl-coenzyme A diphosphatase SCS3	0	0	0	2
sp|P53040|TAF6_YEAST	P53040	TAF6_YEAST	TAF6	516	Saccharomyces cerevisiae (strain ATCC 204508 / S288c)	Transcription initiation factor TFIID subunit 6	0	0	0	1
sp|P53045|ERG25_YEAST	P53045	ERG25_YEAST	ERG25	309	Saccharomyces cerevisiae (strain ATCC 204508 / S288c)	C-4 methylsterol oxidase ERG25	0	0	0	2
sp|P53101|STR3_YEAST	P53101	STR3_YEAST	STR3	465	Saccharomyces cerevisiae (strain ATCC 204508 / S288c)	Cystathionine beta-lyase	0	0	0	1
sp|P53123|MRM2_YEAST	P53123	MRM2_YEAST	MRM2	320	Saccharomyces cerevisiae (strain ATCC 204508 / S288c)	rRNA methyltransferase 2, mitochondrial	0	0	0	1
sp|P53193|JAC1_YEAST	P53193	JAC1_YEAST	JAC1	184	Saccharomyces cerevisiae (strain ATCC 204508 / S288c)	J-type co-chaperone JAC1, mitochondrial	0	0	0	1
sp|P53219|IMO32_YEAST	P53219	IMO32_YEAST	IMO32	342	Saccharomyces cerevisiae (strain ATCC 204508 / S288c)	Probable alcohol acetyltransferase	0	0	0	3
sp|P53230|TAM41_YEAST	P53230	TAM41_YEAST	TAM41	385	Saccharomyces cerevisiae (strain ATCC 204508 / S288c)	Phosphatidate cytidylyltransferase, mitochondrial	0	0	0	6
sp|P53262|VOA1_YEAST	P53262	VOA1_YEAST	VOA1	265	Saccharomyces cerevisiae (strain ATCC 204508 / S288c)	V0 assembly protein 1	0	0	0	1
sp|P53299|TIM13_YEAST	P53299	TIM13_YEAST	TIM13	105	Saccharomyces cerevisiae (strain ATCC 204508 / S288c)	Mitochondrial import inner membrane translocase subunit TIM13	0	0	0	1
sp|P53322|TNA1_YEAST	P53322	TNA1_YEAST	TNA1	534	Saccharomyces cerevisiae (strain ATCC 204508 / S288c)	High-affinity nicotinic acid transporter	0	0	0	3
sp|P53394|SULX_YEAST	P53394	SULX_YEAST	YPR003C	754	Saccharomyces cerevisiae (strain ATCC 204508 / S288c)	Putative sulfate transporter YPR003C	0	0	0	1
sp|P53724|RM50_YEAST	P53724	RM50_YEAST	MRPL50	139	Saccharomyces cerevisiae (strain ATCC 204508 / S288c)	Large ribosomal subunit protein bL9m	0	0	0	1
sp|P53961|GPI15_YEAST	P53961	GPI15_YEAST	GPI15	229	Saccharomyces cerevisiae (strain ATCC 204508 / S288c)	Phosphatidylinositol N-acetylglucosaminyltransferase subunit GPI15	0	0	0	2
sp|P53982|IDHH_YEAST	P53982	IDHH_YEAST	IDP3	420	Saccharomyces cerevisiae (strain ATCC 204508 / S288c)	Isocitrate dehydrogenase [NADP]	0	0	0	2
sp|P54115|ALDH6_YEAST	P54115	ALDH6_YEAST	ALD6	500	Saccharomyces cerevisiae (strain ATCC 204508 / S288c)	Magnesium-activated aldehyde dehydrogenase, cytosolic	0	0	0	7
sp|P87284|PMP3_YEAST	P87284	PMP3_YEAST	PMP3	55	Saccharomyces cerevisiae (strain ATCC 204508 / S288c)	Plasma membrane proteolipid 3	0	0	0	5
sp|Q01976|ADPP_YEAST	Q01976	ADPP_YEAST	YSA1	231	Saccharomyces cerevisiae (strain ATCC 204508 / S288c)	ADP-ribose pyrophosphatase	0	0	0	1
sp|Q02784|GLRX5_YEAST	Q02784	GLRX5_YEAST	GRX5	150	Saccharomyces cerevisiae (strain ATCC 204508 / S288c)	Monothiol glutaredoxin-5, mitochondrial	0	0	0	1
sp|Q02820|NCE1_YEAST	Q02820	NCE1_YEAST	NCE101	53	Saccharomyces cerevisiae (strain ATCC 204508 / S288c)	Non-classical export protein 1	0	0	0	5
sp|Q02892|NOG1_YEAST	Q02892	NOG1_YEAST	NOG1	647	Saccharomyces cerevisiae (strain ATCC 204508 / S288c)	Nucleolar GTP-binding protein 1	0	0	0	1
sp|Q03308|VPS16_YEAST	Q03308	VPS16_YEAST	VPS16	798	Saccharomyces cerevisiae (strain ATCC 204508 / S288c)	Vacuolar protein sorting-associated protein 16	0	0	0	8
sp|Q03653|EFR3_YEAST	Q03653	EFR3_YEAST	EFR3	782	Saccharomyces cerevisiae (strain ATCC 204508 / S288c)	Protein EFR3	0	0	0	4
sp|Q03674|PLB2_YEAST	Q03674	PLB2_YEAST	PLB2	706	Saccharomyces cerevisiae (strain ATCC 204508 / S288c)	Lysophospholipase 2	0	0	0	4
sp|Q03799|RT08_YEAST	Q03799	RT08_YEAST	MRPS8	155	Saccharomyces cerevisiae (strain ATCC 204508 / S288c)	Small ribosomal subunit protein uS8m	0	0	0	2
sp|Q03921|DOP1_YEAST	Q03921	DOP1_YEAST	DOP1	1698	Saccharomyces cerevisiae (strain ATCC 204508 / S288c)	Protein dopey	0	1	0	10
sp|Q03973|HMO1_YEAST	Q03973	HMO1_YEAST	HMO1	246	Saccharomyces cerevisiae (strain ATCC 204508 / S288c)	High mobility group protein 1	0	0	0	4
sp|Q04053|SNX41_YEAST	Q04053	SNX41_YEAST	SNX41	625	Saccharomyces cerevisiae (strain ATCC 204508 / S288c)	Sorting nexin-41	0	0	0	1
sp|Q04338|VTI1_YEAST	Q04338	VTI1_YEAST	VTI1	217	Saccharomyces cerevisiae (strain ATCC 204508 / S288c)	t-SNARE VTI1	0	0	0	1
sp|Q04562|TMN2_YEAST	Q04562	TMN2_YEAST	TMN2	672	Saccharomyces cerevisiae (strain ATCC 204508 / S288c)	Transmembrane 9 superfamily member 2	0	0	0	2
sp|Q04651|ERV41_YEAST	Q04651	ERV41_YEAST	ERV41	352	Saccharomyces cerevisiae (strain ATCC 204508 / S288c)	ER-derived vesicles protein ERV41	0	0	0	1
sp|Q04835|YM87_YEAST	Q04835	YM87_YEAST	YMR253C	414	Saccharomyces cerevisiae (strain ATCC 204508 / S288c)	Uncharacterized membrane protein YMR253C	0	0	0	1
sp|Q04924|GLU2B_YEAST	Q04924	GLU2B_YEAST	GTB1	702	Saccharomyces cerevisiae (strain ATCC 204508 / S288c)	Glucosidase 2 subunit beta	0	0	0	1
sp|Q05497|YD338_YEAST	Q05497	YD338_YEAST	YDR338C	695	Saccharomyces cerevisiae (strain ATCC 204508 / S288c)	Uncharacterized transporter YDR338C	0	0	0	3
sp|Q05812|MSC3_YEAST	Q05812	MSC3_YEAST	MSC3	728	Saccharomyces cerevisiae (strain ATCC 204508 / S288c)	Meiotic sister-chromatid recombination protein 3	0	0	0	1
sp|Q05948|YL225_YEAST	Q05948	YL225_YEAST	YLR225C	407	Saccharomyces cerevisiae (strain ATCC 204508 / S288c)	Uncharacterized SVF1-like protein YLR225C	0	0	0	2
sp|Q06417|TDA5_YEAST	Q06417	TDA5_YEAST	TDA5	326	Saccharomyces cerevisiae (strain ATCC 204508 / S288c)	Uncharacterized oxidoreductase TDA5	0	1	0	1
sp|Q06510|TAZ_YEAST	Q06510	TAZ_YEAST	TAZ1	381	Saccharomyces cerevisiae (strain ATCC 204508 / S288c)	Tafazzin	0	0	0	1
sp|Q06563|SYM1_YEAST	Q06563	SYM1_YEAST	SYM1	197	Saccharomyces cerevisiae (strain ATCC 204508 / S288c)	Protein SYM1	0	0	0	5
sp|Q07540|FRDA_YEAST	Q07540	FRDA_YEAST	YFH1	174	Saccharomyces cerevisiae (strain ATCC 204508 / S288c)	Frataxin homolog, mitochondrial	0	0	0	2
sp|Q07549|SNA4_YEAST	Q07549	SNA4_YEAST	SNA4	140	Saccharomyces cerevisiae (strain ATCC 204508 / S288c)	Protein SNA4	0	0	0	3
sp|Q07560|CRD1_YEAST	Q07560	CRD1_YEAST	CRD1	283	Saccharomyces cerevisiae (strain ATCC 204508 / S288c)	Cardiolipin synthase (CMP-forming)	0	0	0	2
sp|Q07800|PSR1_YEAST	Q07800	PSR1_YEAST	PSR1	427	Saccharomyces cerevisiae (strain ATCC 204508 / S288c)	Phosphatase PSR1	0	0	0	4
sp|Q07807|PUF3_YEAST	Q07807	PUF3_YEAST	PUF3	879	Saccharomyces cerevisiae (strain ATCC 204508 / S288c)	mRNA-binding protein PUF3	0	0	0	4
sp|Q07895|YL001_YEAST	Q07895	YL001_YEAST	YLR001C	862	Saccharomyces cerevisiae (strain ATCC 204508 / S288c)	FAS1 domain-containing protein YLR001C	0	0	0	4
sp|Q08058|COQ10_YEAST	Q08058	COQ10_YEAST	COQ10	207	Saccharomyces cerevisiae (strain ATCC 204508 / S288c)	Coenzyme Q-binding protein COQ10, mitochondrial	0	0	0	3
sp|Q08269|ALR1_YEAST	Q08269	ALR1_YEAST	ALR1	859	Saccharomyces cerevisiae (strain ATCC 204508 / S288c)	Magnesium transporter ALR1	0	0	0	1
sp|Q08650|DGAT2_YEAST	Q08650	DGAT2_YEAST	DGA1	418	Saccharomyces cerevisiae (strain ATCC 204508 / S288c)	Diacylglycerol O-acyltransferase 1	0	0	0	1
sp|Q08686|THTR_YEAST	Q08686	THTR_YEAST	TUM1	304	Saccharomyces cerevisiae (strain ATCC 204508 / S288c)	Thiosulfate sulfurtransferase TUM1	0	0	0	2
sp|Q08742|RDL2_YEAST	Q08742	RDL2_YEAST	RDL2	149	Saccharomyces cerevisiae (strain ATCC 204508 / S288c)	Thiosulfate sulfurtransferase RDL2, mitochondrial	0	0	0	3
sp|Q08926|UIP4_YEAST	Q08926	UIP4_YEAST	UIP4	304	Saccharomyces cerevisiae (strain ATCC 204508 / S288c)	ULP1-interacting protein 4	0	0	0	1
sp|Q12125|GET4_YEAST	Q12125	GET4_YEAST	GET4	312	Saccharomyces cerevisiae (strain ATCC 204508 / S288c)	Golgi to ER traffic protein 4	0	0	0	3
sp|Q12283|FABD_YEAST	Q12283	FABD_YEAST	MCT1	360	Saccharomyces cerevisiae (strain ATCC 204508 / S288c)	Malonyl CoA-acyl carrier protein transacylase, mitochondrial	0	0	0	2
sp|Q12377|RPN6_YEAST	Q12377	RPN6_YEAST	RPN6	434	Saccharomyces cerevisiae (strain ATCC 204508 / S288c)	26S proteasome regulatory subunit RPN6	0	0	0	3
sp|Q12405|LPX1_YEAST	Q12405	LPX1_YEAST	LPX1	387	Saccharomyces cerevisiae (strain ATCC 204508 / S288c)	Peroxisomal membrane protein LPX1	0	0	0	3
sp|Q12464|RUVB2_YEAST	Q12464	RUVB2_YEAST	RVB2	471	Saccharomyces cerevisiae (strain ATCC 204508 / S288c)	RuvB-like protein 2	0	0	0	1
sp|Q12675|ATC4_YEAST	Q12675	ATC4_YEAST	DNF2	1612	Saccharomyces cerevisiae (strain ATCC 204508 / S288c)	Phospholipid-transporting ATPase DNF2	0	0	0	4
sp|Q12692|H2AZ_YEAST	Q12692	H2AZ_YEAST	HTZ1	134	Saccharomyces cerevisiae (strain ATCC 204508 / S288c)	Histone H2A.Z	2	0	0	1
sp|Q3E764|TMA7_YEAST	Q3E764	TMA7_YEAST	TMA7	64	Saccharomyces cerevisiae (strain ATCC 204508 / S288c)	Translation machinery-associated protein 7	1	2	0	0
sp|Q3E7A4|COXM2_YEAST	Q3E7A4	COXM2_YEAST	CMC2	109	Saccharomyces cerevisiae (strain ATCC 204508 / S288c)	COX assembly mitochondrial protein 2	0	0	0	2
tr|G2WE85|G2WE85_YEASK	G2WE85	G2WE85_YEASK	K7_PMA1	918	Saccharomyces cerevisiae (strain Kyokai no. 7 /	Plasma membrane ATPase	1	0	0	0

## Sheet: HD targets 10microM
Protein	Protein ID	Entry Name	Gene	Protein Length	Organism	Description	Control 1 Spectral Count	Control 2 Spectral Count	t-2-hex-alkyne 1 Spectral Count	t-2-hex-alkyne 2 Spectral Count
sp|Q00955|ACAC_YEAST	Q00955	ACAC_YEAST	ACC1	2233	Saccharomyces cerevisiae (strain ATCC 204508 / S288c)	Acetyl-CoA carboxylase	777	583	444	466
sp|P04840|VDAC1_YEAST	P04840	VDAC1_YEAST	POR1	283	Saccharomyces cerevisiae (strain ATCC 204508 / S288c)	Mitochondrial outer membrane protein porin 1	51	50	360	403
sp|P18239|ADT2_YEAST	P18239	ADT2_YEAST	PET9	318	Saccharomyces cerevisiae (strain ATCC 204508 / S288c)	ADP,ATP carrier protein 2	64	47	213	221
sp|P32191|GPDM_YEAST	P32191	GPDM_YEAST	GUT2	649	Saccharomyces cerevisiae (strain ATCC 204508 / S288c)	Glycerol-3-phosphate dehydrogenase, mitochondrial	73	48	210	217
sp|P05030|PMA1_YEAST	P05030	PMA1_YEAST	PMA1	918	Saccharomyces cerevisiae (strain ATCC 204508 / S288c)	Plasma membrane ATPase 1	116	44	205	205
sp|P23641|MPCP_YEAST	P23641	MPCP_YEAST	MIR1	311	Saccharomyces cerevisiae (strain ATCC 204508 / S288c)	Mitochondrial phosphate carrier protein	68	29	176	193
sp|P46367|ALDH4_YEAST	P46367	ALDH4_YEAST	ALD4	519	Saccharomyces cerevisiae (strain ATCC 204508 / S288c)	Potassium-activated aldehyde dehydrogenase, mitochondrial	70	49	157	172
sp|P10591|HSP71_YEAST	P10591	HSP71_YEAST	SSA1	642	Saccharomyces cerevisiae (strain ATCC 204508 / S288c)	Heat shock protein SSA1	35	19	151	156
sp|P38929|ATC2_YEAST	P38929	ATC2_YEAST	PMC1	1173	Saccharomyces cerevisiae (strain ATCC 204508 / S288c)	Calcium-transporting ATPase 2	6	2	143	112
sp|P02994|EF1A_YEAST	P02994	EF1A_YEAST	TEF1	458	Saccharomyces cerevisiae (strain ATCC 204508 / S288c)	Elongation factor 1-alpha	71	35	136	120
sp|P32563|VPP1_YEAST	P32563	VPP1_YEAST	VPH1	840	Saccharomyces cerevisiae (strain ATCC 204508 / S288c)	V-type proton ATPase subunit a, vacuolar isoform	16	8	134	133
sp|P16547|OM45_YEAST	P16547	OM45_YEAST	OM45	393	Saccharomyces cerevisiae (strain ATCC 204508 / S288c)	Mitochondrial outer membrane protein OM45	16	19	133	132
sp|P00830|ATPB_YEAST	P00830	ATPB_YEAST	ATP2	511	Saccharomyces cerevisiae (strain ATCC 204508 / S288c)	ATP synthase subunit beta, mitochondrial	54	21	132	122
sp|A6ZRW3|TOM70_YEAS7	A6ZRW3	TOM70_YEAS7	TOM70	617	Saccharomyces cerevisiae (strain YJM789)	Mitochondrial import receptor subunit TOM70	12	4	120	119
sp|P40215|NDH1_YEAST	P40215	NDH1_YEAST	NDE1	560	Saccharomyces cerevisiae (strain ATCC 204508 / S288c)	External NADH-ubiquinone oxidoreductase 1, mitochondrial	30	31	117	128
sp|P07251|ATPA_YEAST	P07251	ATPA_YEAST	ATP1	545	Saccharomyces cerevisiae (strain ATCC 204508 / S288c)	ATP synthase subunit alpha, mitochondrial	65	34	115	121
sp|P39109|YCFI_YEAST	P39109	YCFI_YEAST	YCF1	1515	Saccharomyces cerevisiae (strain ATCC 204508 / S288c)	Metal resistance protein YCF1	11	0	115	119
sp|P36060|MCR1_YEAST	P36060	MCR1_YEAST	MCR1	302	Saccharomyces cerevisiae (strain ATCC 204508 / S288c)	NADH-cytochrome b5 reductase 2	15	12	113	103
sp|P07256|QCR1_YEAST	P07256	QCR1_YEAST	COR1	457	Saccharomyces cerevisiae (strain ATCC 204508 / S288c)	Cytochrome b-c1 complex subunit 1, mitochondrial	26	24	111	109
sp|P39986|SPF1_YEAST	P39986	SPF1_YEAST	SPF1	1215	Saccharomyces cerevisiae (strain ATCC 204508 / S288c)	Endoplasmic reticulum transmembrane helix translocase	8	0	102	94
sp|P07143|CY1_YEAST	P07143	CY1_YEAST	CYT1	309	Saccharomyces cerevisiae (strain ATCC 204508 / S288c)	Cytochrome c1, heme protein, mitochondrial	22	5	95	81
sp|P30624|LCF1_YEAST	P30624	LCF1_YEAST	FAA1	700	Saccharomyces cerevisiae (strain ATCC 204508 / S288c)	Long-chain-fatty-acid--CoA ligase 1	20	1	95	101
sp|P20967|ODO1_YEAST	P20967	ODO1_YEAST	KGD1	1014	Saccharomyces cerevisiae (strain ATCC 204508 / S288c)	2-oxoglutarate dehydrogenase, mitochondrial	25	1	93	94
sp|P32386|YBT1_YEAST	P32386	YBT1_YEAST	YBT1	1661	Saccharomyces cerevisiae (strain ATCC 204508 / S288c)	ATP-dependent bile acid permease	6	0	92	82
sp|P32891|DLD1_YEAST	P32891	DLD1_YEAST	DLD1	587	Saccharomyces cerevisiae (strain ATCC 204508 / S288c)	D-lactate dehydrogenase [cytochrome] 1, mitochondrial	19	9	90	85
sp|P19882|HSP60_YEAST	P19882	HSP60_YEAST	HSP60	572	Saccharomyces cerevisiae (strain ATCC 204508 / S288c)	Heat shock protein 60, mitochondrial	62	45	85	107
sp|Q03104|MSC1_YEAST	Q03104	MSC1_YEAST	MSC1	513	Saccharomyces cerevisiae (strain ATCC 204508 / S288c)	Meiotic sister chromatid recombination protein 1	1	2	84	97
sp|A6ZZY0|MIC60_YEAS7	A6ZZY0	MIC60_YEAS7	MIC60	539	Saccharomyces cerevisiae (strain YJM789)	MICOS complex subunit MIC60	22	13	83	88
sp|P06168|ILV5_YEAST	P06168	ILV5_YEAST	ILV5	395	Saccharomyces cerevisiae (strain ATCC 204508 / S288c)	Ketol-acid reductoisomerase, mitochondrial	7	5	83	98
sp|P31382|PMT2_YEAST	P31382	PMT2_YEAST	PMT2	759	Saccharomyces cerevisiae (strain ATCC 204508 / S288c)	Dolichyl-phosphate-mannose--protein mannosyltransferase 2	7	0	79	87
sp|Q00711|SDHA_YEAST	Q00711	SDHA_YEAST	SDH1	640	Saccharomyces cerevisiae (strain ATCC 204508 / S288c)	Succinate dehydrogenase [ubiquinone] flavoprotein subunit, mitochondrial	21	11	78	68
sp|P32316|ACH1_YEAST	P32316	ACH1_YEAST	ACH1	526	Saccharomyces cerevisiae (strain ATCC 204508 / S288c)	Acetyl-CoA hydrolase	18	3	77	80
sp|P40989|FKS2_YEAST	P40989	FKS2_YEAST	GSC2	1895	Saccharomyces cerevisiae (strain ATCC 204508 / S288c)	1,3-beta-glucan synthase component GSC2	15	0	75	80
sp|P29704|ERG9_YEAST	P29704	ERG9_YEAST	ERG9	444	Saccharomyces cerevisiae (strain ATCC 204508 / S288c)	Squalene synthase ERG9	2	0	74	90
tr|A6ZRN1|A6ZRN1_YEAS7	A6ZRN1	A6ZRN1_YEAS7	SSB2	613	Saccharomyces cerevisiae (strain YJM789)	Stress-seventy subfamily B protein	28	8	74	64
sp|P19414|ACON_YEAST	P19414	ACON_YEAST	ACO1	778	Saccharomyces cerevisiae (strain ATCC 204508 / S288c)	Aconitate hydratase, mitochondrial	15	9	73	61
tr|E9P9G6|E9P9G6_YEASX	E9P9G6	E9P9G6_YEASX	HXT6	570	Saccharomyces cerevisiae	Hexose transporter 6	19	9	70	95
sp|P16603|NCPR_YEAST	P16603	NCPR_YEAST	NCP1	691	Saccharomyces cerevisiae (strain ATCC 204508 / S288c)	NADPH--cytochrome P450 reductase	12	0	69	76
sp|P47075|VTC4_YEAST	P47075	VTC4_YEAST	VTC4	721	Saccharomyces cerevisiae (strain ATCC 204508 / S288c)	Vacuolar transporter chaperone complex subunit 4	41	3	69	67
sp|Q03640|TCB3_YEAST	Q03640	TCB3_YEAST	TCB3	1545	Saccharomyces cerevisiae (strain ATCC 204508 / S288c)	Tricalbin-3	37	0	69	55
sp|P54783|ALO_YEAST	P54783	ALO_YEAST	ALO1	526	Saccharomyces cerevisiae (strain ATCC 204508 / S288c)	D-arabinono-1,4-lactone oxidase	13	3	68	72
sp|Q02776|TIM50_YEAST	Q02776	TIM50_YEAST	TIM50	476	Saccharomyces cerevisiae (strain ATCC 204508 / S288c)	Mitochondrial import inner membrane translocase subunit TIM50	3	0	67	81
sp|P00890|CISY1_YEAST	P00890	CISY1_YEAST	CIT1	479	Saccharomyces cerevisiae (strain ATCC 204508 / S288c)	Citrate synthase, mitochondrial	11	0	65	80
sp|P21147|ACO1_YEAST	P21147	ACO1_YEAST	OLE1	510	Saccharomyces cerevisiae (strain ATCC 204508 / S288c)	Acyl-CoA desaturase 1	4	0	64	73
sp|P32340|NDI1_YEAST	P32340	NDI1_YEAST	NDI1	513	Saccharomyces cerevisiae (strain ATCC 204508 / S288c)	Rotenone-insensitive NADH-ubiquinone oxidoreductase, mitochondrial	10	0	64	65
sp|P33303|SFC1_YEAST	P33303	SFC1_YEAST	SFC1	322	Saccharomyces cerevisiae (strain ATCC 204508 / S288c)	Succinate/fumarate mitochondrial transporter	18	11	64	68
sp|P33775|PMT1_YEAST	P33775	PMT1_YEAST	PMT1	817	Saccharomyces cerevisiae (strain ATCC 204508 / S288c)	Dolichyl-phosphate-mannose--protein mannosyltransferase 1	0	0	63	52
sp|Q02725|VTC3_YEAST	Q02725	VTC3_YEAST	VTC3	835	Saccharomyces cerevisiae (strain ATCC 204508 / S288c)	Vacuolar transporter chaperone 3 complex subunit 3	18	0	62	56
sp|Q04947|RTN1_YEAST	Q04947	RTN1_YEAST	RTN1	295	Saccharomyces cerevisiae (strain ATCC 204508 / S288c)	Reticulon-like protein 1	15	8	62	56
sp|P16521|EF3A_YEAST	P16521	EF3A_YEAST	YEF3	1044	Saccharomyces cerevisiae (strain ATCC 204508 / S288c)	Elongation factor 3A	17	6	61	54
sp|P14020|DPM1_YEAST	P14020	DPM1_YEAST	DPM1	267	Saccharomyces cerevisiae (strain ATCC 204508 / S288c)	Dolichol-phosphate mannosyltransferase	19	12	60	57
sp|P17967|PDI_YEAST	P17967	PDI_YEAST	PDI1	522	Saccharomyces cerevisiae (strain ATCC 204508 / S288c)	Protein disulfide-isomerase	4	0	60	78
sp|P06169|PDC1_YEAST	P06169	PDC1_YEAST	PDC1	563	Saccharomyces cerevisiae (strain ATCC 204508 / S288c)	Pyruvate decarboxylase isozyme 1	1	0	57	57
sp|P0CS90|HSP77_YEAST	P0CS90	HSP77_YEAST	SSC1	654	Saccharomyces cerevisiae (strain ATCC 204508 / S288c)	Import motor subunit, mitochondrial	11	2	57	53
sp|P32897|TIM23_YEAST	P32897	TIM23_YEAST	TIM23	222	Saccharomyces cerevisiae (strain ATCC 204508 / S288c)	Mitochondrial import inner membrane translocase subunit TIM23	2	0	57	48
sp|P21576|VPS1_YEAST	P21576	VPS1_YEAST	VPS1	704	Saccharomyces cerevisiae (strain ATCC 204508 / S288c)	Vacuolar protein sorting-associated protein 1	7	1	56	56
sp|P32335|MSS51_YEAST	P32335	MSS51_YEAST	MSS51	436	Saccharomyces cerevisiae (strain ATCC 204508 / S288c)	Protein MSS51, mitochondrial	1	0	55	57
sp|P08417|FUMH_YEAST	P08417	FUMH_YEAST	FUM1	488	Saccharomyces cerevisiae (strain ATCC 204508 / S288c)	Fumarate hydratase, mitochondrial	14	6	54	79
sp|P32324|EF2_YEAST	P32324	EF2_YEAST	EFT1	842	Saccharomyces cerevisiae (strain ATCC 204508 / S288c)	Elongation factor 2	27	11	54	59
sp|P32368|SAC1_YEAST	P32368	SAC1_YEAST	SAC1	623	Saccharomyces cerevisiae (strain ATCC 204508 / S288c)	Phosphatidylinositol-3-phosphatase SAC1	0	0	54	54
sp|P00128|QCR7_YEAST	P00128	QCR7_YEAST	QCR7	127	Saccharomyces cerevisiae (strain ATCC 204508 / S288c)	Cytochrome b-c1 complex subunit 7, mitochondrial	5	2	53	49
sp|P17505|MDHM_YEAST	P17505	MDHM_YEAST	MDH1	334	Saccharomyces cerevisiae (strain ATCC 204508 / S288c)	Malate dehydrogenase, mitochondrial	28	14	53	58
sp|P17255|VATA_YEAST	P17255	VATA_YEAST	VMA1	1071	Saccharomyces cerevisiae (strain ATCC 204508 / S288c)	V-type proton ATPase catalytic subunit A	5	0	52	67
sp|P53312|SUCB_YEAST	P53312	SUCB_YEAST	LSC2	427	Saccharomyces cerevisiae (strain ATCC 204508 / S288c)	Succinate--CoA ligase [ADP-forming] subunit beta, mitochondrial	4	3	52	49
sp|P16474|BIP_YEAST	P16474	BIP_YEAST	KAR2	682	Saccharomyces cerevisiae (strain ATCC 204508 / S288c)	Endoplasmic reticulum chaperone BiP	4	0	51	58
sp|P07257|QCR2_YEAST	P07257	QCR2_YEAST	QCR2	368	Saccharomyces cerevisiae (strain ATCC 204508 / S288c)	Cytochrome b-c1 complex subunit 2, mitochondrial	23	9	50	49
sp|Q12443|RTN2_YEAST	Q12443	RTN2_YEAST	RTN2	393	Saccharomyces cerevisiae (strain ATCC 204508 / S288c)	Reticulon-like protein 2	0	0	50	42
sp|P12683|HMDH1_YEAST	P12683	HMDH1_YEAST	HMG1	1054	Saccharomyces cerevisiae (strain ATCC 204508 / S288c)	3-hydroxy-3-methylglutaryl-coenzyme A reductase 1	12	0	49	56
sp|P00549|KPYK1_YEAST	P00549	KPYK1_YEAST	CDC19	500	Saccharomyces cerevisiae (strain ATCC 204508 / S288c)	Pyruvate kinase 1	5	0	48	39
sp|P09624|DLDH_YEAST	P09624	DLDH_YEAST	LPD1	499	Saccharomyces cerevisiae (strain ATCC 204508 / S288c)	Dihydrolipoyl dehydrogenase, mitochondrial	14	5	48	69
sp|P36161|NU133_YEAST	P36161	NU133_YEAST	NUP133	1157	Saccharomyces cerevisiae (strain ATCC 204508 / S288c)	Nucleoporin NUP133	0	0	48	37
sp|P38695|HXT5_YEAST	P38695	HXT5_YEAST	HXT5	592	Saccharomyces cerevisiae (strain ATCC 204508 / S288c)	Probable glucose transporter HXT5	7	1	48	62
sp|Q05567|SGPL_YEAST	Q05567	SGPL_YEAST	DPL1	589	Saccharomyces cerevisiae (strain ATCC 204508 / S288c)	Sphingosine-1-phosphate lyase	1	0	48	51
sp|Q12374|NCA2_YEAST	Q12374	NCA2_YEAST	NCA2	616	Saccharomyces cerevisiae (strain ATCC 204508 / S288c)	Nuclear control of ATPase protein 2	8	0	48	56
sp|P32795|YME1_YEAST	P32795	YME1_YEAST	YME1	747	Saccharomyces cerevisiae (strain ATCC 204508 / S288c)	Mitochondrial inner membrane i-AAA protease supercomplex subunit YME1	5	0	47	63
sp|P38077|ATPG_YEAST	P38077	ATPG_YEAST	ATP3	311	Saccharomyces cerevisiae (strain ATCC 204508 / S288c)	ATP synthase subunit gamma, mitochondrial	21	16	47	64
sp|P00359|G3P3_YEAST	P00359	G3P3_YEAST	TDH3	332	Saccharomyces cerevisiae (strain ATCC 204508 / S288c)	Glyceraldehyde-3-phosphate dehydrogenase 3	13	7	46	42
sp|P23644|TOM40_YEAST	P23644	TOM40_YEAST	TOM40	387	Saccharomyces cerevisiae (strain ATCC 204508 / S288c)	Mitochondrial import receptor subunit TOM40	5	7	46	50
sp|P38250|IST2_YEAST	P38250	IST2_YEAST	IST2	946	Saccharomyces cerevisiae (strain ATCC 204508 / S288c)	Increased sodium tolerance protein 2	7	0	46	62
sp|P09457|ATPO_YEAST	P09457	ATPO_YEAST	ATP5	212	Saccharomyces cerevisiae (strain ATCC 204508 / S288c)	ATP synthase subunit 5, mitochondrial	15	4	45	39
sp|P14906|SEC63_YEAST	P14906	SEC63_YEAST	SEC63	663	Saccharomyces cerevisiae (strain ATCC 204508 / S288c)	Protein translocation protein SEC63	0	0	45	51
sp|P40341|YTA12_YEAST	P40341	YTA12_YEAST	YTA12	825	Saccharomyces cerevisiae (strain ATCC 204508 / S288c)	Mitochondrial respiratory chain complexes assembly protein YTA12	1	0	45	47
sp|P25087|ERG6_YEAST	P25087	ERG6_YEAST	ERG6	383	Saccharomyces cerevisiae (strain ATCC 204508 / S288c)	Sterol 24-C-methyltransferase ERG6	3	1	44	37
sp|P38694|MSC7_YEAST	P38694	MSC7_YEAST	MSC7	644	Saccharomyces cerevisiae (strain ATCC 204508 / S288c)	Putative aldehyde dehydrogenase-like protein YHR039C	3	0	44	47
sp|P40086|COX15_YEAST	P40086	COX15_YEAST	COX15	486	Saccharomyces cerevisiae (strain ATCC 204508 / S288c)	Cytochrome c oxidase assembly protein COX15	2	0	44	41
sp|P40318|DOA10_YEAST	P40318	DOA10_YEAST	SSM4	1319	Saccharomyces cerevisiae (strain ATCC 204508 / S288c)	ERAD-associated E3 ubiquitin-protein ligase DOA10	0	0	44	34
sp|P47054|NU192_YEAST	P47054	NU192_YEAST	NUP192	1683	Saccharomyces cerevisiae (strain ATCC 204508 / S288c)	Nucleoporin NUP192	8	2	44	41
sp|Q12117|MRH1_YEAST	Q12117	MRH1_YEAST	MRH1	320	Saccharomyces cerevisiae (strain ATCC 204508 / S288c)	Protein MRH1	23	8	44	47
sp|P04037|COX4_YEAST	P04037	COX4_YEAST	COX4	155	Saccharomyces cerevisiae (strain ATCC 204508 / S288c)	Cytochrome c oxidase subunit 4, mitochondrial	10	4	43	36
sp|P11154|PYC1_YEAST	P11154	PYC1_YEAST	PYC1	1178	Saccharomyces cerevisiae (strain ATCC 204508 / S288c)	Pyruvate carboxylase 1	89	67	43	47
sp|P07342|ILVB_YEAST	P07342	ILVB_YEAST	ILV2	687	Saccharomyces cerevisiae (strain ATCC 204508 / S288c)	Acetolactate synthase catalytic subunit, mitochondrial	3	1	42	42
sp|P36148|GPT2_YEAST	P36148	GPT2_YEAST	GPT2	743	Saccharomyces cerevisiae (strain ATCC 204508 / S288c)	Glycerol-3-phosphate O-acyltransferase 2	56	1	42	50
sp|P39968|VAC8_YEAST	P39968	VAC8_YEAST	VAC8	578	Saccharomyces cerevisiae (strain ATCC 204508 / S288c)	Vacuolar protein 8	8	0	42	42
sp|A6ZLG8|OM14_YEAS7	A6ZLG8	OM14_YEAS7	OM14	134	Saccharomyces cerevisiae (strain YJM789)	Mitochondrial outer membrane protein OM14	4	1	41	47
sp|A6ZTW2|SHE10_YEAS7	A6ZTW2	SHE10_YEAS7	SHE10	577	Saccharomyces cerevisiae (strain YJM789)	Outer spore wall assembly protein SHE10	8	1	41	40
sp|P25297|PHO84_YEAST	P25297	PHO84_YEAST	PHO84	587	Saccharomyces cerevisiae (strain ATCC 204508 / S288c)	Inorganic phosphate transporter PHO84	1	0	41	50
sp|P25340|ERG4_YEAST	P25340	ERG4_YEAST	ERG4	473	Saccharomyces cerevisiae (strain ATCC 204508 / S288c)	Delta(24(24(1)))-sterol reductase ERG4	2	0	41	38
sp|P47154|STE24_YEAST	P47154	STE24_YEAST	STE24	453	Saccharomyces cerevisiae (strain ATCC 204508 / S288c)	CAAX prenyl protease 1	1	0	41	38
sp|Q03281|HEH2_YEAST	Q03281	HEH2_YEAST	HEH2	663	Saccharomyces cerevisiae (strain ATCC 204508 / S288c)	Inner nuclear membrane protein HEH2	13	0	41	36
sp|P02992|EFTU_YEAST	P02992	EFTU_YEAST	TUF1	437	Saccharomyces cerevisiae (strain ATCC 204508 / S288c)	Elongation factor Tu, mitochondrial	14	3	40	40
sp|P81449|ATPJ_YEAST	P81449	ATPJ_YEAST	TIM11	96	Saccharomyces cerevisiae (strain ATCC 204508 / S288c)	ATP synthase subunit e, mitochondrial	5	3	40	42
sp|Q03327|UGO1_YEAST	Q03327	UGO1_YEAST	UGO1	502	Saccharomyces cerevisiae (strain ATCC 204508 / S288c)	Mitochondrial fusion and transport protein UGO1	0	0	40	35
sp|Q08548|ALE1_YEAST	Q08548	ALE1_YEAST	ALE1	619	Saccharomyces cerevisiae (strain ATCC 204508 / S288c)	Lysophospholipid acyltransferase	0	0	40	31
sp|P06105|SC160_YEAST	P06105	SC160_YEAST	SCP160	1222	Saccharomyces cerevisiae (strain ATCC 204508 / S288c)	Protein SCP160	11	0	39	37
sp|P25349|YCP4_YEAST	P25349	YCP4_YEAST	YCP4	247	Saccharomyces cerevisiae (strain ATCC 204508 / S288c)	Flavoprotein-like protein YCP4	3	5	39	28
sp|P28241|IDH2_YEAST	P28241	IDH2_YEAST	IDH2	369	Saccharomyces cerevisiae (strain ATCC 204508 / S288c)	Isocitrate dehydrogenase [NAD] subunit 2, mitochondrial	26	13	39	39
sp|P32843|YME2_YEAST	P32843	YME2_YEAST	YME2	850	Saccharomyces cerevisiae (strain ATCC 204508 / S288c)	Mitochondrial escape protein 2	4	0	39	42
sp|P33311|MDL2_YEAST	P33311	MDL2_YEAST	MDL2	773	Saccharomyces cerevisiae (strain ATCC 204508 / S288c)	ATP-dependent permease MDL2, mitochondrial	0	0	39	29
sp|P34248|YKK0_YEAST	P34248	YKK0_YEAST	YKL100C	587	Saccharomyces cerevisiae (strain ATCC 204508 / S288c)	Probable intramembrane protease YKL100C	3	0	39	46
sp|P46971|PMT4_YEAST	P46971	PMT4_YEAST	PMT4	762	Saccharomyces cerevisiae (strain ATCC 204508 / S288c)	Dolichyl-phosphate-mannose--protein mannosyltransferase 4	0	0	39	35
sp|P33333|PLSC_YEAST	P33333	PLSC_YEAST	SLC1	303	Saccharomyces cerevisiae (strain ATCC 204508 / S288c)	1-acyl-sn-glycerol-3-phosphate acyltransferase	1	0	38	41
sp|P39007|STT3_YEAST	P39007	STT3_YEAST	STT3	718	Saccharomyces cerevisiae (strain ATCC 204508 / S288c)	Dolichyl-diphosphooligosaccharide--protein glycosyltransferase subunit STT3	3	0	38	39
sp|P41807|VATH_YEAST	P41807	VATH_YEAST	VMA13	478	Saccharomyces cerevisiae (strain ATCC 204508 / S288c)	V-type proton ATPase subunit H	11	1	38	42
sp|P42839|VNX1_YEAST	P42839	VNX1_YEAST	VNX1	908	Saccharomyces cerevisiae (strain ATCC 204508 / S288c)	Low affinity vacuolar monovalent cation/H(+) antiporter	1	0	38	40
sp|P53206|MCY1_YEAST	P53206	MCY1_YEAST	MCY1	393	Saccharomyces cerevisiae (strain ATCC 204508 / S288c)	Putative mitochondrial cysteine synthase	4	0	38	26
sp|Q04228|UBX2_YEAST	Q04228	UBX2_YEAST	UBX2	584	Saccharomyces cerevisiae (strain ATCC 204508 / S288c)	UBX domain-containing protein 2	1	0	38	33
sp|Q06485|ATG33_YEAST	Q06485	ATG33_YEAST	ATG33	197	Saccharomyces cerevisiae (strain ATCC 204508 / S288c)	Autophagy-related protein 33	0	0	38	44
sp|P10664|RL4A_YEAST	P10664	RL4A_YEAST	RPL4A	362	Saccharomyces cerevisiae (strain ATCC 204508 / S288c)	Large ribosomal subunit protein uL4A	9	9	37	32
sp|P22855|MAN1_YEAST	P22855	MAN1_YEAST	AMS1	1083	Saccharomyces cerevisiae (strain ATCC 204508 / S288c)	Alpha-mannosidase	2	1	37	41
sp|P28834|IDH1_YEAST	P28834	IDH1_YEAST	IDH1	360	Saccharomyces cerevisiae (strain ATCC 204508 / S288c)	Isocitrate dehydrogenase [NAD] subunit 1, mitochondrial	5	0	37	50
sp|P00410|COX2_YEAST	P00410	COX2_YEAST	COX2	251	Saccharomyces cerevisiae (strain ATCC 204508 / S288c)	Cytochrome c oxidase subunit 2	9	5	36	38
sp|P01123|YPT1_YEAST	P01123	YPT1_YEAST	YPT1	206	Saccharomyces cerevisiae (strain ATCC 204508 / S288c)	GTP-binding protein YPT1	4	1	36	47
sp|P06208|LEU1_YEAST	P06208	LEU1_YEAST	LEU4	619	Saccharomyces cerevisiae (strain ATCC 204508 / S288c)	2-isopropylmalate synthase	2	0	36	34
sp|P32332|OAC1_YEAST	P32332	OAC1_YEAST	OAC1	324	Saccharomyces cerevisiae (strain ATCC 204508 / S288c)	Mitochondrial oxaloacetate transport protein	0	0	36	37
sp|P38825|TOM71_YEAST	P38825	TOM71_YEAST	TOM71	639	Saccharomyces cerevisiae (strain ATCC 204508 / S288c)	Protein TOM71	0	0	36	54
sp|P39522|ILV3_YEAST	P39522	ILV3_YEAST	ILV3	585	Saccharomyces cerevisiae (strain ATCC 204508 / S288c)	Dihydroxy-acid dehydratase, mitochondrial	2	0	36	39
sp|P36035|JEN1_YEAST	P36035	JEN1_YEAST	JEN1	616	Saccharomyces cerevisiae (strain ATCC 204508 / S288c)	Carboxylic acid transporter protein homolog	5	0	35	51
sp|P38264|PHO88_YEAST	P38264	PHO88_YEAST	PHO88	188	Saccharomyces cerevisiae (strain ATCC 204508 / S288c)	SRP-independent targeting protein 3	5	0	35	46
sp|P38286|MKAR_YEAST	P38286	MKAR_YEAST	IFA38	347	Saccharomyces cerevisiae (strain ATCC 204508 / S288c)	Very-long-chain 3-oxoacyl-CoA reductase	4	0	35	42
sp|Q12029|FSF1_YEAST	Q12029	FSF1_YEAST	FSF1	327	Saccharomyces cerevisiae (strain ATCC 204508 / S288c)	Sideroflexin FSF1	5	3	35	38
sp|P10614|CP51_YEAST	P10614	CP51_YEAST	ERG11	530	Saccharomyces cerevisiae (strain ATCC 204508 / S288c)	Lanosterol 14-alpha demethylase CYP51	0	0	34	40
sp|P38219|OLA1_YEAST	P38219	OLA1_YEAST	OLA1	394	Saccharomyces cerevisiae (strain ATCC 204508 / S288c)	Obg-like ATPase 1	18	9	34	32
sp|P38988|GGC1_YEAST	P38988	GGC1_YEAST	GGC1	300	Saccharomyces cerevisiae (strain ATCC 204508 / S288c)	Mitochondrial GTP/GDP carrier protein 1	9	4	34	42
sp|Q02981|YP109_YEAST	Q02981	YP109_YEAST	YPL109C	657	Saccharomyces cerevisiae (strain ATCC 204508 / S288c)	ABC1 family protein YPL109C, mitochondrial	0	0	34	31
sp|Q03028|ODC1_YEAST	Q03028	ODC1_YEAST	ODC1	310	Saccharomyces cerevisiae (strain ATCC 204508 / S288c)	Mitochondrial 2-oxodicarboxylate carrier 1	5	5	34	37
sp|P16622|HEMH_YEAST	P16622	HEMH_YEAST	HEM15	393	Saccharomyces cerevisiae (strain ATCC 204508 / S288c)	Ferrochelatase, mitochondrial	5	0	33	22
sp|P37298|DHSD_YEAST	P37298	DHSD_YEAST	SDH4	181	Saccharomyces cerevisiae (strain ATCC 204508 / S288c)	Succinate dehydrogenase [ubiquinone] cytochrome b small subunit, mitochondrial	1	0	33	42
sp|Q99190|TECR_YEAST	Q99190	TECR_YEAST	TSC13	310	Saccharomyces cerevisiae (strain ATCC 204508 / S288c)	Very-long-chain enoyl-CoA reductase	0	0	33	34
tr|A6ZXZ4|A6ZXZ4_YEAS7	A6ZXZ4	A6ZXZ4_YEAS7	PST2	198	Saccharomyces cerevisiae (strain YJM789)	Protoplasts-secreted	8	5	33	38
tr|C7GKJ5|C7GKJ5_YEAS2	C7GKJ5	C7GKJ5_YEAS2	AFG3	761	Saccharomyces cerevisiae (strain JAY291)	Afg3p	0	0	33	31
sp|A6ZRW8|YNL5_YEAS7	A6ZRW8	YNL5_YEAS7	SCY_4679	644	Saccharomyces cerevisiae (strain YJM789)	Uncharacterized vacuolar membrane protein SCY_4679	0	0	32	28
sp|A7A1W1|RS3A1_YEAS7	A7A1W1	RS3A1_YEAS7	RPS1A	255	Saccharomyces cerevisiae (strain YJM789)	Small ribosomal subunit protein eS1A	4	0	32	32
sp|P00560|PGK_YEAST	P00560	PGK_YEAST	PGK1	416	Saccharomyces cerevisiae (strain ATCC 204508 / S288c)	Phosphoglycerate kinase	5	1	32	38
sp|P32331|YMC1_YEAST	P32331	YMC1_YEAST	YMC1	307	Saccharomyces cerevisiae (strain ATCC 204508 / S288c)	Mitochondrial glycine transporter YMC1	0	0	32	27
sp|P36013|MAOM_YEAST	P36013	MAOM_YEAST	MAE1	669	Saccharomyces cerevisiae (strain ATCC 204508 / S288c)	NAD-dependent malic enzyme, mitochondrial	0	0	32	29
sp|P50085|PHB2_YEAST	P50085	PHB2_YEAST	PHB2	310	Saccharomyces cerevisiae (strain ATCC 204508 / S288c)	Prohibitin-2	0	0	32	33
sp|Q04458|HFD1_YEAST	Q04458	HFD1_YEAST	HFD1	532	Saccharomyces cerevisiae (strain ATCC 204508 / S288c)	Fatty aldehyde dehydrogenase HFD1	10	5	32	45
sp|Q04697|GSF2_YEAST	Q04697	GSF2_YEAST	GSF2	403	Saccharomyces cerevisiae (strain ATCC 204508 / S288c)	Glucose-signaling factor 2	4	0	32	41
sp|Q07651|FMP45_YEAST	Q07651	FMP45_YEAST	FMP45	309	Saccharomyces cerevisiae (strain ATCC 204508 / S288c)	SUR7 family protein FMP45	0	0	32	27
sp|Q08968|SELO_YEAST	Q08968	SELO_YEAST	FMP40	688	Saccharomyces cerevisiae (strain ATCC 204508 / S288c)	Protein adenylyltransferase SelO, mitochondrial	0	0	32	26
sp|P00927|THDH_YEAST	P00927	THDH_YEAST	ILV1	576	Saccharomyces cerevisiae (strain ATCC 204508 / S288c)	Threonine dehydratase, mitochondrial	2	0	31	34
sp|P14772|BPT1_YEAST	P14772	BPT1_YEAST	BPT1	1559	Saccharomyces cerevisiae (strain ATCC 204508 / S288c)	Bile pigment transporter 1	1	0	31	33
sp|P21954|IDHP_YEAST	P21954	IDHP_YEAST	IDP1	428	Saccharomyces cerevisiae (strain ATCC 204508 / S288c)	Isocitrate dehydrogenase [NADP], mitochondrial	6	2	31	37
sp|P38626|NCB5R_YEAST	P38626	NCB5R_YEAST	CBR1	284	Saccharomyces cerevisiae (strain ATCC 204508 / S288c)	NADH-cytochrome b5 reductase 1	2	0	31	32
sp|P48563|MON2_YEAST	P48563	MON2_YEAST	MON2	1636	Saccharomyces cerevisiae (strain ATCC 204508 / S288c)	Protein MON2	0	0	31	22
sp|P49573|CTR1_YEAST	P49573	CTR1_YEAST	CTR1	406	Saccharomyces cerevisiae (strain ATCC 204508 / S288c)	Copper transport protein CTR1	3	0	31	34
sp|P53868|ALG9_YEAST	P53868	ALG9_YEAST	ALG9	555	Saccharomyces cerevisiae (strain ATCC 204508 / S288c)	Alpha-1,2-mannosyltransferase ALG9	0	0	31	34
sp|Q00055|GPD1_YEAST	Q00055	GPD1_YEAST	GPD1	391	Saccharomyces cerevisiae (strain ATCC 204508 / S288c)	Glycerol-3-phosphate dehydrogenase [NAD(+)] 1	11	1	31	34
sp|P35729|NU120_YEAST	P35729	NU120_YEAST	NUP120	1037	Saccharomyces cerevisiae (strain ATCC 204508 / S288c)	Nucleoporin NUP120	1	0	30	28
sp|P36775|LONM_YEAST	P36775	LONM_YEAST	PIM1	1133	Saccharomyces cerevisiae (strain ATCC 204508 / S288c)	Lon protease homolog, mitochondrial	0	0	30	29
sp|P40319|ELO3_YEAST	P40319	ELO3_YEAST	ELO3	345	Saccharomyces cerevisiae (strain ATCC 204508 / S288c)	Elongation of fatty acids protein 3	4	1	30	29
sp|P40495|LYS12_YEAST	P40495	LYS12_YEAST	LYS12	371	Saccharomyces cerevisiae (strain ATCC 204508 / S288c)	Homoisocitrate dehydrogenase, mitochondrial	13	1	30	29
sp|P43585|VTC2_YEAST	P43585	VTC2_YEAST	VTC2	828	Saccharomyces cerevisiae (strain ATCC 204508 / S288c)	Vacuolar transporter chaperone complex subunit 2	0	0	30	30
sp|Q07500|NDH2_YEAST	Q07500	NDH2_YEAST	NDE2	545	Saccharomyces cerevisiae (strain ATCC 204508 / S288c)	External NADH-ubiquinone oxidoreductase 2, mitochondrial	0	0	30	26
sp|Q08179|MDM38_YEAST	Q08179	MDM38_YEAST	MDM38	573	Saccharomyces cerevisiae (strain ATCC 204508 / S288c)	Mitochondrial distribution and morphology protein 38	0	0	30	39
sp|Q12230|LSP1_YEAST	Q12230	LSP1_YEAST	LSP1	341	Saccharomyces cerevisiae (strain ATCC 204508 / S288c)	Sphingolipid long chain base-responsive protein LSP1	9	0	30	30
sp|A6ZP10|SEY1_YEAS7	A6ZP10	SEY1_YEAS7	SEY1	776	Saccharomyces cerevisiae (strain YJM789)	Protein SEY1	0	0	29	27
sp|A6ZUG8|CHO2_YEAS7	A6ZUG8	CHO2_YEAS7	CHO2	869	Saccharomyces cerevisiae (strain YJM789)	Phosphatidylethanolamine N-methyltransferase	0	0	29	31
sp|P14126|RL3_YEAST	P14126	RL3_YEAST	RPL3	387	Saccharomyces cerevisiae (strain ATCC 204508 / S288c)	Large ribosomal subunit protein uL3	1	1	29	26
sp|P25619|HSP30_YEAST	P25619	HSP30_YEAST	HSP30	332	Saccharomyces cerevisiae (strain ATCC 204508 / S288c)	30 kDa heat shock protein	0	0	29	36
sp|P32798|COT1_YEAST	P32798	COT1_YEAST	COT1	439	Saccharomyces cerevisiae (strain ATCC 204508 / S288c)	Vacuolar zinc transporter COT1	1	0	29	39
sp|P40053|AIM9_YEAST	P40053	AIM9_YEAST	AIM9	627	Saccharomyces cerevisiae (strain ATCC 204508 / S288c)	Altered inheritance of mitochondria protein 9, mitochondrial	1	0	29	28
sp|Q12164|POM33_YEAST	Q12164	POM33_YEAST	POM33	279	Saccharomyces cerevisiae (strain ATCC 204508 / S288c)	Pore membrane protein of 33 kDa	0	0	29	28
sp|Q12697|YPK9_YEAST	Q12697	YPK9_YEAST	YPK9	1472	Saccharomyces cerevisiae (strain ATCC 204508 / S288c)	Vacuolar cation-transporting ATPase YPK9	0	0	29	34
sp|P16387|ODPA_YEAST	P16387	ODPA_YEAST	PDA1	420	Saccharomyces cerevisiae (strain ATCC 204508 / S288c)	Pyruvate dehydrogenase E1 component subunit alpha, mitochondrial	9	4	28	41
sp|P21801|SDHB_YEAST	P21801	SDHB_YEAST	SDH2	266	Saccharomyces cerevisiae (strain ATCC 204508 / S288c)	Succinate dehydrogenase [ubiquinone] iron-sulfur subunit, mitochondrial	16	5	28	31
sp|P33416|HSP78_YEAST	P33416	HSP78_YEAST	HSP78	811	Saccharomyces cerevisiae (strain ATCC 204508 / S288c)	Heat shock protein 78, mitochondrial	2	0	28	23
sp|P38703|LAG1_YEAST	P38703	LAG1_YEAST	LAG1	411	Saccharomyces cerevisiae (strain ATCC 204508 / S288c)	Ceramide synthase LAG1	6	1	28	35
sp|P39006|PSD1_YEAST	P39006	PSD1_YEAST	PSD1	500	Saccharomyces cerevisiae (strain ATCC 204508 / S288c)	Phosphatidylserine decarboxylase proenzyme 1, mitochondrial	1	0	28	20
sp|P39685|PO152_YEAST	P39685	PO152_YEAST	POM152	1337	Saccharomyces cerevisiae (strain ATCC 204508 / S288c)	Nucleoporin POM152	0	0	28	32
sp|P40069|IMB4_YEAST	P40069	IMB4_YEAST	KAP123	1113	Saccharomyces cerevisiae (strain ATCC 204508 / S288c)	Importin subunit beta-4	2	0	28	28
sp|P52893|ALAM_YEAST	P52893	ALAM_YEAST	ALT1	592	Saccharomyces cerevisiae (strain ATCC 204508 / S288c)	Probable alanine aminotransferase, mitochondrial	0	0	28	20
sp|P53969|SAM50_YEAST	P53969	SAM50_YEAST	SAM50	484	Saccharomyces cerevisiae (strain ATCC 204508 / S288c)	Sorting assembly machinery 50 kDa subunit	0	0	28	25
sp|Q04013|YHM2_YEAST	Q04013	YHM2_YEAST	YHM2	314	Saccharomyces cerevisiae (strain ATCC 204508 / S288c)	Citrate/oxoglutarate carrier protein	11	5	28	33
sp|Q07451|YET3_YEAST	Q07451	YET3_YEAST	YET3	203	Saccharomyces cerevisiae (strain ATCC 204508 / S288c)	Endoplasmic reticulum transmembrane protein 3	0	0	28	30
sp|P00175|CYB2_YEAST	P00175	CYB2_YEAST	CYB2	591	Saccharomyces cerevisiae (strain ATCC 204508 / S288c)	L-lactate dehydrogenase (cytochrome)	0	0	27	28
sp|P00330|ADH1_YEAST	P00330	ADH1_YEAST	ADH1	348	Saccharomyces cerevisiae (strain ATCC 204508 / S288c)	Alcohol dehydrogenase 1	4	3	27	30
sp|P25618|CWH43_YEAST	P25618	CWH43_YEAST	CWH43	953	Saccharomyces cerevisiae (strain ATCC 204508 / S288c)	Protein CWH43	0	0	27	33
sp|P32266|MGM1_YEAST	P32266	MGM1_YEAST	MGM1	881	Saccharomyces cerevisiae (strain ATCC 204508 / S288c)	Dynamin-like GTPase MGM1, mitochondrial	0	0	27	22
sp|P38631|FKS1_YEAST	P38631	FKS1_YEAST	FKS1	1876	Saccharomyces cerevisiae (strain ATCC 204508 / S288c)	1,3-beta-glucan synthase component FKS1	1	0	27	25
sp|P40064|NU157_YEAST	P40064	NU157_YEAST	NUP157	1391	Saccharomyces cerevisiae (strain ATCC 204508 / S288c)	Nucleoporin NUP157	12	0	27	29
sp|P40075|SCS2_YEAST	P40075	SCS2_YEAST	SCS2	244	Saccharomyces cerevisiae (strain ATCC 204508 / S288c)	Vesicle-associated membrane protein-associated protein SCS2	6	1	27	24
sp|P53723|YN8B_YEAST	P53723	YN8B_YEAST	YNR021W	404	Saccharomyces cerevisiae (strain ATCC 204508 / S288c)	UPF0674 endoplasmic reticulum membrane protein YNR021W	3	1	27	31
sp|P53954|ALG11_YEAST	P53954	ALG11_YEAST	ALG11	548	Saccharomyces cerevisiae (strain ATCC 204508 / S288c)	GDP-Man:Man(3)GlcNAc(2)-PP-Dol alpha-1,2-mannosyltransferase	0	0	27	22
sp|Q08972|NEW1_YEAST	Q08972	NEW1_YEAST	NEW1	1196	Saccharomyces cerevisiae (strain ATCC 204508 / S288c)	[NU+] prion formation protein 1	8	0	27	27
sp|A6ZRY0|MIC27_YEAS7	A6ZRY0	MIC27_YEAS7	MIC27	234	Saccharomyces cerevisiae (strain YJM789)	MICOS complex subunit MIC27	1	0	26	29
sp|P12684|HMDH2_YEAST	P12684	HMDH2_YEAST	HMG2	1045	Saccharomyces cerevisiae (strain ATCC 204508 / S288c)	3-hydroxy-3-methylglutaryl-coenzyme A reductase 2	10	0	26	28
sp|P38221|CDS1_YEAST	P38221	CDS1_YEAST	CDS1	457	Saccharomyces cerevisiae (strain ATCC 204508 / S288c)	Phosphatidate cytidylyltransferase	1	1	26	31
sp|P43636|ALG2_YEAST	P43636	ALG2_YEAST	ALG2	503	Saccharomyces cerevisiae (strain ATCC 204508 / S288c)	Alpha-1,3/1,6-mannosyltransferase ALG2	0	0	26	26
sp|P53266|SHY1_YEAST	P53266	SHY1_YEAST	SHY1	389	Saccharomyces cerevisiae (strain ATCC 204508 / S288c)	Cytochrome oxidase assembly protein SHY1	0	0	26	22
sp|P08067|UCRI_YEAST	P08067	UCRI_YEAST	RIP1	215	Saccharomyces cerevisiae (strain ATCC 204508 / S288c)	Cytochrome b-c1 complex subunit Rieske, mitochondrial	8	0	25	23
sp|P08456|PSS_YEAST	P08456	PSS_YEAST	CHO1	276	Saccharomyces cerevisiae (strain ATCC 204508 / S288c)	CDP-diacylglycerol--serine O-phosphatidyltransferase	0	0	25	27
sp|P11076|ARF1_YEAST	P11076	ARF1_YEAST	ARF1	181	Saccharomyces cerevisiae (strain ATCC 204508 / S288c)	ADP-ribosylation factor 1	9	0	25	22
sp|P20606|SAR1_YEAST	P20606	SAR1_YEAST	SAR1	190	Saccharomyces cerevisiae (strain ATCC 204508 / S288c)	Small COPII coat GTPase SAR1	5	0	25	26
sp|P38181|NU170_YEAST	P38181	NU170_YEAST	NUP170	1502	Saccharomyces cerevisiae (strain ATCC 204508 / S288c)	Nucleoporin NUP170	4	0	25	30
sp|P38295|MCFS2_YEAST	P38295	MCFS2_YEAST	EHT1	451	Saccharomyces cerevisiae (strain ATCC 204508 / S288c)	Medium-chain fatty acid ethyl ester synthase/esterase 2	0	0	25	30
sp|P39012|GAA1_YEAST	P39012	GAA1_YEAST	GAA1	614	Saccharomyces cerevisiae (strain ATCC 204508 / S288c)	GPI transamidase component GAA1	0	0	25	24
sp|P40088|FTR1_YEAST	P40088	FTR1_YEAST	FTR1	404	Saccharomyces cerevisiae (strain ATCC 204508 / S288c)	Plasma membrane iron permease	2	0	25	21
sp|P41805|RL10_YEAST	P41805	RL10_YEAST	RPL10	221	Saccharomyces cerevisiae (strain ATCC 204508 / S288c)	Large ribosomal subunit protein uL16	2	0	25	27
sp|P46672|ARC1_YEAST	P46672	ARC1_YEAST	ARC1	376	Saccharomyces cerevisiae (strain ATCC 204508 / S288c)	tRNA-aminoacylation cofactor ARC1	47	40	25	25
sp|P53898|NSG2_YEAST	P53898	NSG2_YEAST	NSG2	299	Saccharomyces cerevisiae (strain ATCC 204508 / S288c)	Protein NSG2	0	0	25	19
sp|P00427|COX6_YEAST	P00427	COX6_YEAST	COX6	148	Saccharomyces cerevisiae (strain ATCC 204508 / S288c)	Cytochrome c oxidase subunit 6, mitochondrial	2	1	24	24
sp|P23542|AATC_YEAST	P23542	AATC_YEAST	AAT2	418	Saccharomyces cerevisiae (strain ATCC 204508 / S288c)	Aspartate aminotransferase, cytoplasmic	2	0	24	27
sp|P27514|PHO91_YEAST	P27514	PHO91_YEAST	PHO91	894	Saccharomyces cerevisiae (strain ATCC 204508 / S288c)	Low-affinity phosphate transporter PHO91	0	0	24	16
sp|P33767|OSTB_YEAST	P33767	OSTB_YEAST	WBP1	430	Saccharomyces cerevisiae (strain ATCC 204508 / S288c)	Dolichyl-diphosphooligosaccharide--protein glycosyltransferase subunit WBP1	6	0	24	33
sp|P34227|PRX1_YEAST	P34227	PRX1_YEAST	PRX1	261	Saccharomyces cerevisiae (strain ATCC 204508 / S288c)	Peroxiredoxin PRX1, mitochondrial	10	3	24	26
sp|P36139|PET10_YEAST	P36139	PET10_YEAST	PET10	283	Saccharomyces cerevisiae (strain ATCC 204508 / S288c)	Protein PET10	0	0	24	20
sp|P40035|PIC2_YEAST	P40035	PIC2_YEAST	PIC2	300	Saccharomyces cerevisiae (strain ATCC 204508 / S288c)	Mitochondrial phosphate carrier protein 2	2	0	24	29
sp|P53199|ERG26_YEAST	P53199	ERG26_YEAST	ERG26	349	Saccharomyces cerevisiae (strain ATCC 204508 / S288c)	Sterol-4-alpha-carboxylate 3-dehydrogenase ERG26, decarboxylating	0	0	24	24
sp|P53598|SUCA_YEAST	P53598	SUCA_YEAST	LSC1	329	Saccharomyces cerevisiae (strain ATCC 204508 / S288c)	Succinate--CoA ligase [ADP-forming] subunit alpha, mitochondrial	5	4	24	28
sp|A6ZR27|ALDH5_YEAS7	A6ZR27	ALDH5_YEAS7	ALD5	520	Saccharomyces cerevisiae (strain YJM789)	Aldehyde dehydrogenase 5, mitochondrial	0	0	23	17
sp|P08525|QCR8_YEAST	P08525	QCR8_YEAST	QCR8	94	Saccharomyces cerevisiae (strain ATCC 204508 / S288c)	Cytochrome b-c1 complex subunit 8, mitochondrial	0	0	23	23
sp|P20107|ZRC1_YEAST	P20107	ZRC1_YEAST	ZRC1	442	Saccharomyces cerevisiae (strain ATCC 204508 / S288c)	Vacuolar zinc transporter ZRC1	2	1	23	20
sp|Q00245|RHO3_YEAST	Q00245	RHO3_YEAST	RHO3	231	Saccharomyces cerevisiae (strain ATCC 204508 / S288c)	GTP-binding protein RHO3	0	0	23	18
sp|Q03690|CLU_YEAST	Q03690	CLU_YEAST	CLU1	1277	Saccharomyces cerevisiae (strain ATCC 204508 / S288c)	Clustered mitochondria protein 1	0	0	23	16
sp|Q06833|NVJ2_YEAST	Q06833	NVJ2_YEAST	NVJ2	770	Saccharomyces cerevisiae (strain ATCC 204508 / S288c)	Nucleus-vacuole junction protein 2	0	0	23	26
sp|Q07878|VPS13_YEAST	Q07878	VPS13_YEAST	VPS13	3144	Saccharomyces cerevisiae (strain ATCC 204508 / S288c)	Intermembrane lipid transfer protein VPS13	0	0	23	23
sp|Q12010|YPQ1_YEAST	Q12010	YPQ1_YEAST	YPQ1	308	Saccharomyces cerevisiae (strain ATCC 204508 / S288c)	Probable vacuolar amino acid transporter YPQ1	1	0	23	20
sp|Q12452|ERG27_YEAST	Q12452	ERG27_YEAST	ERG27	347	Saccharomyces cerevisiae (strain ATCC 204508 / S288c)	3-keto-steroid reductase ERG27	0	0	23	31
sp|P00424|COX5A_YEAST	P00424	COX5A_YEAST	COX5A	153	Saccharomyces cerevisiae (strain ATCC 204508 / S288c)	Cytochrome c oxidase subunit 5A, mitochondrial	1	1	22	16
sp|P05626|ATPF_YEAST	P05626	ATPF_YEAST	ATP4	244	Saccharomyces cerevisiae (strain ATCC 204508 / S288c)	ATP synthase subunit 4, mitochondrial	7	4	22	30
sp|P13586|ATC1_YEAST	P13586	ATC1_YEAST	PMR1	950	Saccharomyces cerevisiae (strain ATCC 204508 / S288c)	Calcium-transporting ATPase 1	0	0	22	21
sp|P16140|VATB_YEAST	P16140	VATB_YEAST	VMA2	517	Saccharomyces cerevisiae (strain ATCC 204508 / S288c)	V-type proton ATPase subunit B	2	0	22	19
sp|P32916|SRPR_YEAST	P32916	SRPR_YEAST	SRP101	621	Saccharomyces cerevisiae (strain ATCC 204508 / S288c)	Signal recognition particle receptor subunit alpha homolog	0	0	22	21
sp|P39952|OXA1_YEAST	P39952	OXA1_YEAST	OXA1	402	Saccharomyces cerevisiae (strain ATCC 204508 / S288c)	Mitochondrial inner membrane protein OXA1	0	0	22	26
sp|P40515|FIS1_YEAST	P40515	FIS1_YEAST	FIS1	155	Saccharomyces cerevisiae (strain ATCC 204508 / S288c)	Mitochondrial fission 1 protein	0	0	22	16
sp|P53273|YG35_YEAST	P53273	YG35_YEAST	YGR125W	1036	Saccharomyces cerevisiae (strain ATCC 204508 / S288c)	Uncharacterized vacuolar membrane protein YGR125W	0	0	22	17
sp|P53730|ALG12_YEAST	P53730	ALG12_YEAST	ALG12	551	Saccharomyces cerevisiae (strain ATCC 204508 / S288c)	Dol-P-Man:Man(7)GlcNAc(2)-PP-Dol alpha-1,6-mannosyltransferase	0	0	22	23
sp|Q00402|NUM1_YEAST	Q00402	NUM1_YEAST	NUM1	2748	Saccharomyces cerevisiae (strain ATCC 204508 / S288c)	Nuclear migration protein NUM1	14	0	22	32
sp|Q12078|SMF3_YEAST	Q12078	SMF3_YEAST	SMF3	473	Saccharomyces cerevisiae (strain ATCC 204508 / S288c)	Iron transporter SMF3	0	0	22	22
sp|Q12466|TCB1_YEAST	Q12466	TCB1_YEAST	TCB1	1186	Saccharomyces cerevisiae (strain ATCC 204508 / S288c)	Tricalbin-1	10	1	22	25
sp|A6ZQL5|MDV1_YEAS7	A6ZQL5	MDV1_YEAS7	MDV1	714	Saccharomyces cerevisiae (strain YJM789)	Mitochondrial division protein 1	0	0	21	13
sp|P05750|RS3_YEAST	P05750	RS3_YEAST	RPS3	240	Saccharomyces cerevisiae (strain ATCC 204508 / S288c)	Small ribosomal subunit protein uS3	2	0	21	20
sp|P07267|CARP_YEAST	P07267	CARP_YEAST	PEP4	405	Saccharomyces cerevisiae (strain ATCC 204508 / S288c)	Saccharopepsin	1	0	21	32
sp|P07275|PUT2_YEAST	P07275	PUT2_YEAST	PUT2	575	Saccharomyces cerevisiae (strain ATCC 204508 / S288c)	Delta-1-pyrroline-5-carboxylate dehydrogenase, mitochondrial	0	0	21	22
sp|P09440|C1TM_YEAST	P09440	C1TM_YEAST	MIS1	975	Saccharomyces cerevisiae (strain ATCC 204508 / S288c)	C-1-tetrahydrofolate synthase, mitochondrial	0	0	21	20
sp|P32901|PTR2_YEAST	P32901	PTR2_YEAST	PTR2	601	Saccharomyces cerevisiae (strain ATCC 204508 / S288c)	Peptide transporter PTR2	0	0	21	20
sp|P33892|GCN1_YEAST	P33892	GCN1_YEAST	GCN1	2672	Saccharomyces cerevisiae (strain ATCC 204508 / S288c)	eIF-2-alpha kinase activator GCN1	2	0	21	15
sp|P34077|NIC96_YEAST	P34077	NIC96_YEAST	NIC96	839	Saccharomyces cerevisiae (strain ATCC 204508 / S288c)	Nucleoporin NIC96	9	0	21	28
sp|P38353|SSH1_YEAST	P38353	SSH1_YEAST	SSH1	490	Saccharomyces cerevisiae (strain ATCC 204508 / S288c)	Sec sixty-one protein homolog	1	0	21	17
sp|P38756|TCD1_YEAST	P38756	TCD1_YEAST	TCD1	429	Saccharomyces cerevisiae (strain ATCC 204508 / S288c)	tRNA threonylcarbamoyladenosine dehydratase 1	0	0	21	18
sp|Q02207|FOX2_YEAST	Q02207	FOX2_YEAST	FOX2	900	Saccharomyces cerevisiae (strain ATCC 204508 / S288c)	Peroxisomal hydratase-dehydrogenase-epimerase	0	0	21	15
sp|Q06493|YLH47_YEAST	Q06493	YLH47_YEAST	YLH47	454	Saccharomyces cerevisiae (strain ATCC 204508 / S288c)	LETM1 domain-containing protein YLH47, mitochondrial	0	0	21	24
sp|Q12296|MAM3_YEAST	Q12296	MAM3_YEAST	MAM3	706	Saccharomyces cerevisiae (strain ATCC 204508 / S288c)	Protein MAM3	0	0	21	15
sp|Q12428|PRPD_YEAST	Q12428	PRPD_YEAST	PDH1	516	Saccharomyces cerevisiae (strain ATCC 204508 / S288c)	Probable 2-methylcitrate dehydratase	0	0	21	16
tr|C7GY94|C7GY94_YEAS2	C7GY94	C7GY94_YEAS2	MDJ1	511	Saccharomyces cerevisiae (strain JAY291)	Mdj1p	0	0	21	15
sp|P00925|ENO2_YEAST	P00925	ENO2_YEAST	ENO2	437	Saccharomyces cerevisiae (strain ATCC 204508 / S288c)	Enolase 2	0	0	20	18
sp|P06182|CCHL_YEAST	P06182	CCHL_YEAST	CYC3	269	Saccharomyces cerevisiae (strain ATCC 204508 / S288c)	Holocytochrome-c synthase	0	1	20	22
sp|P25574|EMC1_YEAST	P25574	EMC1_YEAST	EMC1	760	Saccharomyces cerevisiae (strain ATCC 204508 / S288c)	ER membrane protein complex subunit 1	0	0	20	15
sp|P32454|APE2_YEAST	P32454	APE2_YEAST	APE2	952	Saccharomyces cerevisiae (strain ATCC 204508 / S288c)	Aminopeptidase 2, mitochondrial	0	0	20	19
sp|P32568|SNQ2_YEAST	P32568	SNQ2_YEAST	SNQ2	1501	Saccharomyces cerevisiae (strain ATCC 204508 / S288c)	Protein SNQ2	0	0	20	20
sp|P38891|BCA1_YEAST	P38891	BCA1_YEAST	BAT1	393	Saccharomyces cerevisiae (strain ATCC 204508 / S288c)	Branched-chain-amino-acid aminotransferase, mitochondrial	0	0	20	25
sp|P39996|GTT3_YEAST	P39996	GTT3_YEAST	GTT3	337	Saccharomyces cerevisiae (strain ATCC 204508 / S288c)	Glutathione transferase 3	0	0	20	23
sp|P53154|GUP1_YEAST	P53154	GUP1_YEAST	GUP1	560	Saccharomyces cerevisiae (strain ATCC 204508 / S288c)	Membrane-bound O-acyltransferase GUP1	0	0	20	22
sp|P53721|RCF2_YEAST	P53721	RCF2_YEAST	RCF2	224	Saccharomyces cerevisiae (strain ATCC 204508 / S288c)	Respiratory supercomplex factor 2, mitochondrial	0	0	20	14
sp|P60010|ACT_YEAST	P60010	ACT_YEAST	ACT1	375	Saccharomyces cerevisiae (strain ATCC 204508 / S288c)	Actin	11	2	20	22
sp|A6ZTA1|NVJ1_YEAS7	A6ZTA1	NVJ1_YEAS7	NVJ1	321	Saccharomyces cerevisiae (strain YJM789)	Nucleus-vacuole junction protein 1	0	0	19	11
sp|P00401|COX1_YEAST	P00401	COX1_YEAST	COX1	534	Saccharomyces cerevisiae (strain ATCC 204508 / S288c)	Cytochrome c oxidase subunit 1	0	0	19	21
sp|P07560|SEC4_YEAST	P07560	SEC4_YEAST	SEC4	215	Saccharomyces cerevisiae (strain ATCC 204508 / S288c)	Ras-related protein SEC4	2	0	19	24
sp|P14540|ALF_YEAST	P14540	ALF_YEAST	FBA1	359	Saccharomyces cerevisiae (strain ATCC 204508 / S288c)	Fructose-bisphosphate aldolase	0	0	19	15
sp|P32599|FIMB_YEAST	P32599	FIMB_YEAST	SAC6	642	Saccharomyces cerevisiae (strain ATCC 204508 / S288c)	Fimbrin	4	0	19	12
sp|P38011|GBLP_YEAST	P38011	GBLP_YEAST	ASC1	319	Saccharomyces cerevisiae (strain ATCC 204508 / S288c)	Small ribosomal subunit protein RACK1	5	0	19	20
sp|P38225|FAT1_YEAST	P38225	FAT1_YEAST	FAT1	669	Saccharomyces cerevisiae (strain ATCC 204508 / S288c)	Very long-chain fatty acid transport protein	0	0	19	17
sp|P40416|ATM1_YEAST	P40416	ATM1_YEAST	ATM1	690	Saccharomyces cerevisiae (strain ATCC 204508 / S288c)	Iron-sulfur clusters transporter ATM1, mitochondrial	0	0	19	17
sp|P40970|LCB2_YEAST	P40970	LCB2_YEAST	LCB2	561	Saccharomyces cerevisiae (strain ATCC 204508 / S288c)	Serine palmitoyltransferase 2	0	0	19	18
sp|P49017|COQ5_YEAST	P49017	COQ5_YEAST	COQ5	307	Saccharomyces cerevisiae (strain ATCC 204508 / S288c)	2-methoxy-6-polyprenyl-1,4-benzoquinol methylase, mitochondrial	0	0	19	18
sp|P50087|MIC26_YEAST	P50087	MIC26_YEAST	MIC26	233	Saccharomyces cerevisiae (strain ATCC 204508 / S288c)	MICOS subunit MIC26	1	0	19	17
sp|Q08023|FMP25_YEAST	Q08023	FMP25_YEAST	FMP25	583	Saccharomyces cerevisiae (strain ATCC 204508 / S288c)	Protein FMP25, mitochondrial	0	0	19	29
sp|Q08822|ETFD_YEAST	Q08822	ETFD_YEAST	CIR2	631	Saccharomyces cerevisiae (strain ATCC 204508 / S288c)	Probable electron transfer flavoprotein-ubiquinone oxidoreductase, mitochondrial	0	0	19	27
sp|Q99385|VCX1_YEAST	Q99385	VCX1_YEAST	VCX1	411	Saccharomyces cerevisiae (strain ATCC 204508 / S288c)	Vacuolar calcium ion transporter	0	0	19	23
tr|C8Z992|C8Z992_YEAS8	C8Z992	C8Z992_YEAS8	EC1118_1G1_5281g	759	Saccharomyces cerevisiae (strain Lalvin	Dolichyl-phosphate-mannose--protein mannosyltransferase	0	0	19	19
sp|A6ZXM9|GET3_YEAS7	A6ZXM9	GET3_YEAS7	GET3	354	Saccharomyces cerevisiae (strain YJM789)	ATPase GET3	0	0	18	21
sp|P06780|RHO1_YEAST	P06780	RHO1_YEAST	RHO1	209	Saccharomyces cerevisiae (strain ATCC 204508 / S288c)	GTP-binding protein RHO1	0	0	18	16
sp|P0CX41|RL23A_YEAST	P0CX41	RL23A_YEAST	RPL23A	137	Saccharomyces cerevisiae (strain ATCC 204508 / S288c)	Large ribosomal subunit protein uL14A	6	2	18	20
sp|P25560|RER1_YEAST	P25560	RER1_YEAST	RER1	188	Saccharomyces cerevisiae (strain ATCC 204508 / S288c)	Protein RER1	0	0	18	21
sp|P33327|DHE2_YEAST	P33327	DHE2_YEAST	GDH2	1092	Saccharomyces cerevisiae (strain ATCC 204508 / S288c)	NAD-specific glutamate dehydrogenase	0	0	18	16
sp|P33421|SDH3_YEAST	P33421	SDH3_YEAST	SDH3	198	Saccharomyces cerevisiae (strain ATCC 204508 / S288c)	Succinate dehydrogenase [ubiquinone] cytochrome b subunit, mitochondrial	3	0	18	16
sp|P36101|TCD2_YEAST	P36101	TCD2_YEAST	TCD2	447	Saccharomyces cerevisiae (strain ATCC 204508 / S288c)	tRNA threonylcarbamoyladenosine dehydratase 2	0	0	18	19
sp|P38085|TAT1_YEAST	P38085	TAT1_YEAST	TAT1	619	Saccharomyces cerevisiae (strain ATCC 204508 / S288c)	Valine/tyrosine/tryptophan amino-acid permease 1	0	0	18	22
sp|P38127|RIM2_YEAST	P38127	RIM2_YEAST	RIM2	377	Saccharomyces cerevisiae (strain ATCC 204508 / S288c)	Mitochondrial carrier protein RIM2	0	0	18	17
sp|P38310|FTH1_YEAST	P38310	FTH1_YEAST	FTH1	465	Saccharomyces cerevisiae (strain ATCC 204508 / S288c)	Iron transporter FTH1	0	0	18	21
sp|P38731|ARN1_YEAST	P38731	ARN1_YEAST	ARN1	627	Saccharomyces cerevisiae (strain ATCC 204508 / S288c)	Siderophore iron transporter ARN1	0	0	18	19
sp|P39722|GEM1_YEAST	P39722	GEM1_YEAST	GEM1	662	Saccharomyces cerevisiae (strain ATCC 204508 / S288c)	Mitochondrial Rho GTPase 1	0	0	18	22
sp|P40169|YNT4_YEAST	P40169	YNT4_YEAST	YNL194C	301	Saccharomyces cerevisiae (strain ATCC 204508 / S288c)	Uncharacterized plasma membrane protein YNL194C	0	0	18	16
sp|P40528|SYG1_YEAST	P40528	SYG1_YEAST	SYG1	902	Saccharomyces cerevisiae (strain ATCC 204508 / S288c)	Protein SYG1	0	0	18	22
sp|P46956|PHO86_YEAST	P46956	PHO86_YEAST	PHO86	311	Saccharomyces cerevisiae (strain ATCC 204508 / S288c)	Inorganic phosphate transporter PHO86	6	0	18	14
sp|P47082|AVT1_YEAST	P47082	AVT1_YEAST	AVT1	602	Saccharomyces cerevisiae (strain ATCC 204508 / S288c)	Vacuolar amino acid transporter 1	0	0	18	11
sp|P47912|LCF4_YEAST	P47912	LCF4_YEAST	FAA4	694	Saccharomyces cerevisiae (strain ATCC 204508 / S288c)	Long-chain-fatty-acid--CoA ligase 4	0	0	18	16
sp|P53140|RMD9_YEAST	P53140	RMD9_YEAST	RMD9	646	Saccharomyces cerevisiae (strain ATCC 204508 / S288c)	RNA-binding protein RMD9, mitochondrial	0	0	18	14
sp|Q07830|GPI13_YEAST	Q07830	GPI13_YEAST	GPI13	1017	Saccharomyces cerevisiae (strain ATCC 204508 / S288c)	GPI ethanolamine phosphate transferase 3	0	0	18	15
sp|A6ZXG9|DHH1_YEAS7	A6ZXG9	DHH1_YEAS7	DHH1	506	Saccharomyces cerevisiae (strain YJM789)	ATP-dependent RNA helicase DHH1	1	0	17	6
sp|C7GTL7|AEP2_YEAS2	C7GTL7	AEP2_YEAS2	AEP2	580	Saccharomyces cerevisiae (strain JAY291)	ATPase expression protein 2, mitochondrial	0	0	17	19
sp|P00447|SODM_YEAST	P00447	SODM_YEAST	SOD2	233	Saccharomyces cerevisiae (strain ATCC 204508 / S288c)	Superoxide dismutase [Mn], mitochondrial	0	0	17	16
sp|P17709|HXKG_YEAST	P17709	HXKG_YEAST	GLK1	500	Saccharomyces cerevisiae (strain ATCC 204508 / S288c)	Glucokinase-1	0	0	17	18
sp|P18900|COQ1_YEAST	P18900	COQ1_YEAST	COQ1	473	Saccharomyces cerevisiae (strain ATCC 204508 / S288c)	Hexaprenyl pyrophosphate synthase, mitochondrial	0	0	17	13
sp|P31412|VATC_YEAST	P31412	VATC_YEAST	VMA5	392	Saccharomyces cerevisiae (strain ATCC 204508 / S288c)	V-type proton ATPase subunit C	2	0	17	17
sp|P31539|HS104_YEAST	P31539	HS104_YEAST	HSP104	908	Saccharomyces cerevisiae (strain ATCC 204508 / S288c)	Heat shock protein 104	1	0	17	19
sp|P32792|YHH7_YEAST	P32792	YHH7_YEAST	YSC83	385	Saccharomyces cerevisiae (strain ATCC 204508 / S288c)	UPF0744 protein YSC83	1	0	17	16
sp|P34730|BMH2_YEAST	P34730	BMH2_YEAST	BMH2	273	Saccharomyces cerevisiae (strain ATCC 204508 / S288c)	Protein BMH2	4	0	17	12
sp|P36147|PAM17_YEAST	P36147	PAM17_YEAST	PAM17	197	Saccharomyces cerevisiae (strain ATCC 204508 / S288c)	Presequence translocated-associated motor subunit PAM17, mitochondrial	1	6	17	12
sp|P37292|GLYM_YEAST	P37292	GLYM_YEAST	SHM1	490	Saccharomyces cerevisiae (strain ATCC 204508 / S288c)	Serine hydroxymethyltransferase, mitochondrial	4	0	17	23
sp|P38555|YPT31_YEAST	P38555	YPT31_YEAST	YPT31	223	Saccharomyces cerevisiae (strain ATCC 204508 / S288c)	GTP-binding protein YPT31/YPT8	2	0	17	20
sp|P38993|FET3_YEAST	P38993	FET3_YEAST	FET3	636	Saccharomyces cerevisiae (strain ATCC 204508 / S288c)	Iron transport multicopper oxidase FET3	14	1	17	18
sp|P40471|AYR1_YEAST	P40471	AYR1_YEAST	AYR1	297	Saccharomyces cerevisiae (strain ATCC 204508 / S288c)	NADPH-dependent 1-acyldihydroxyacetone phosphate reductase	2	0	17	12
sp|P40499|ICE2_YEAST	P40499	ICE2_YEAST	ICE2	491	Saccharomyces cerevisiae (strain ATCC 204508 / S288c)	Protein ICE2	0	0	17	16
sp|Q04602|VBA4_YEAST	Q04602	VBA4_YEAST	VBA4	768	Saccharomyces cerevisiae (strain ATCC 204508 / S288c)	Vacuolar basic amino acid transporter 4	1	0	17	19
sp|Q04935|COX20_YEAST	Q04935	COX20_YEAST	COX20	205	Saccharomyces cerevisiae (strain ATCC 204508 / S288c)	Cytochrome c oxidase assembly protein COX20, mitochondrial	0	0	17	25
sp|Q06169|PEX30_YEAST	Q06169	PEX30_YEAST	PEX30	523	Saccharomyces cerevisiae (strain ATCC 204508 / S288c)	Peroxisomal membrane protein PEX30	0	0	17	16
sp|Q06644|PMT7_YEAST	Q06644	PMT7_YEAST	PMT7	662	Saccharomyces cerevisiae (strain ATCC 204508 / S288c)	Probable dolichyl-phosphate-mannose--protein mannosyltransferase 7	0	0	17	18
sp|Q08818|MSC6_YEAST	Q08818	MSC6_YEAST	MSC6	692	Saccharomyces cerevisiae (strain ATCC 204508 / S288c)	Meiotic sister-chromatid recombination protein 6, mitochondrial	0	0	17	20
sp|Q08959|PGC1_YEAST	Q08959	PGC1_YEAST	PGC1	321	Saccharomyces cerevisiae (strain ATCC 204508 / S288c)	Phosphatidylglycerol phospholipase C	0	0	17	16
sp|Q12200|NPC1_YEAST	Q12200	NPC1_YEAST	NCR1	1170	Saccharomyces cerevisiae (strain ATCC 204508 / S288c)	NPC intracellular sterol transporter 1-related protein 1	0	0	17	19
sp|P12385|ERF1_YEAST	P12385	ERF1_YEAST	SUP45	437	Saccharomyces cerevisiae (strain ATCC 204508 / S288c)	Eukaryotic peptide chain release factor subunit 1	0	0	16	14
sp|P21375|OSM1_YEAST	P21375	OSM1_YEAST	OSM1	501	Saccharomyces cerevisiae (strain ATCC 204508 / S288c)	Fumarate reductase 2	0	0	16	21
sp|P25371|ADP1_YEAST	P25371	ADP1_YEAST	ADP1	1049	Saccharomyces cerevisiae (strain ATCC 204508 / S288c)	Probable ATP-dependent permease	0	0	16	21
sp|P32602|SEC17_YEAST	P32602	SEC17_YEAST	SEC17	292	Saccharomyces cerevisiae (strain ATCC 204508 / S288c)	Alpha-soluble NSF attachment protein	0	0	16	12
sp|P32660|ATC5_YEAST	P32660	ATC5_YEAST	DNF1	1571	Saccharomyces cerevisiae (strain ATCC 204508 / S288c)	Phospholipid-transporting ATPase DNF1	0	0	16	17
sp|P32791|FRE1_YEAST	P32791	FRE1_YEAST	FRE1	686	Saccharomyces cerevisiae (strain ATCC 204508 / S288c)	Ferric/cupric reductase transmembrane component 1	0	0	16	21
sp|P32915|SC61A_YEAST	P32915	SC61A_YEAST	SEC61	480	Saccharomyces cerevisiae (strain ATCC 204508 / S288c)	Protein transport protein SEC61	0	0	16	16
sp|P38071|ETR1_YEAST	P38071	ETR1_YEAST	ETR1	380	Saccharomyces cerevisiae (strain ATCC 204508 / S288c)	Enoyl-[acyl-carrier-protein] reductase, mitochondrial	0	0	16	14
sp|P39935|IF4F1_YEAST	P39935	IF4F1_YEAST	TIF4631	952	Saccharomyces cerevisiae (strain ATCC 204508 / S288c)	Eukaryotic initiation factor 4F subunit p150	2	0	16	13
sp|P40533|TED1_YEAST	P40533	TED1_YEAST	TED1	473	Saccharomyces cerevisiae (strain ATCC 204508 / S288c)	Protein TED1	0	0	16	17
sp|P53326|YG5L_YEAST	P53326	YG5L_YEAST	YGR266W	701	Saccharomyces cerevisiae (strain ATCC 204508 / S288c)	Uncharacterized protein YGR266W	1	0	16	9
sp|A6ZTA5|AIM46_YEAS7	A6ZTA5	AIM46_YEAS7	AIM46	310	Saccharomyces cerevisiae (strain YJM789)	Altered inheritance of mitochondria protein 46, mitochondrial	2	0	15	20
sp|A6ZZY2|YKR18_YEAS7	A6ZZY2	YKR18_YEAS7	SCY_3392	725	Saccharomyces cerevisiae (strain YJM789)	IML2-like protein SCY_3392	1	0	15	14
sp|O13535|YH11B_YEAST	O13535	YH11B_YEAST	TY1B-H	1793	Saccharomyces cerevisiae (strain ATCC 204508 / S288c)	Transposon Ty1-H Gag-Pol polyprotein	6	0	15	19
sp|P00044|CYC1_YEAST	P00044	CYC1_YEAST	CYC1	109	Saccharomyces cerevisiae (strain ATCC 204508 / S288c)	Cytochrome c isoform 1	7	0	15	16
sp|P00163|CYB_YEAST	P00163	CYB_YEAST	COB	385	Saccharomyces cerevisiae (strain ATCC 204508 / S288c)	Cytochrome b	0	0	15	18
sp|P01120|RAS2_YEAST	P01120	RAS2_YEAST	RAS2	322	Saccharomyces cerevisiae (strain ATCC 204508 / S288c)	Ras-like protein 2	3	0	15	16
sp|P04147|PABP_YEAST	P04147	PABP_YEAST	PAB1	577	Saccharomyces cerevisiae (strain ATCC 204508 / S288c)	Polyadenylate-binding protein, cytoplasmic and nuclear	4	0	15	16
sp|P06367|RS14A_YEAST	P06367	RS14A_YEAST	RPS14A	137	Saccharomyces cerevisiae (strain ATCC 204508 / S288c)	Small ribosomal subunit protein uS11A	0	0	15	14
sp|P0CX37|RS6A_YEAST	P0CX37	RS6A_YEAST	RPS6A	236	Saccharomyces cerevisiae (strain ATCC 204508 / S288c)	Small ribosomal subunit protein eS6A	4	5	15	11
sp|P18962|DAP2_YEAST	P18962	DAP2_YEAST	DAP2	818	Saccharomyces cerevisiae (strain ATCC 204508 / S288c)	Dipeptidyl aminopeptidase B	0	0	15	18
sp|P22137|CLH_YEAST	P22137	CLH_YEAST	CHC1	1653	Saccharomyces cerevisiae (strain ATCC 204508 / S288c)	Clathrin heavy chain	13	0	15	19
sp|P26321|RL5_YEAST	P26321	RL5_YEAST	RPL5	297	Saccharomyces cerevisiae (strain ATCC 204508 / S288c)	Large ribosomal subunit protein uL18	1	0	15	12
sp|P30902|ATP7_YEAST	P30902	ATP7_YEAST	ATP7	174	Saccharomyces cerevisiae (strain ATCC 204508 / S288c)	ATP synthase subunit d, mitochondrial	8	4	15	17
sp|P32366|VA0D_YEAST	P32366	VA0D_YEAST	VMA6	345	Saccharomyces cerevisiae (strain ATCC 204508 / S288c)	V-type proton ATPase subunit d	8	5	15	15
sp|P32799|COX13_YEAST	P32799	COX13_YEAST	COX13	129	Saccharomyces cerevisiae (strain ATCC 204508 / S288c)	Cytochrome c oxidase subunit 13, mitochondrial	3	0	15	20
sp|P36062|AVT3_YEAST	P36062	AVT3_YEAST	AVT3	692	Saccharomyces cerevisiae (strain ATCC 204508 / S288c)	Vacuolar amino acid transporter 3	0	0	15	21
sp|P38837|NSG1_YEAST	P38837	NSG1_YEAST	NSG1	291	Saccharomyces cerevisiae (strain ATCC 204508 / S288c)	Protein NSG1	0	0	15	21
sp|P39524|ATC3_YEAST	P39524	ATC3_YEAST	DRS2	1355	Saccharomyces cerevisiae (strain ATCC 204508 / S288c)	Phospholipid-transporting ATPase DRS2	0	0	15	17
sp|P39533|ACON2_YEAST	P39533	ACON2_YEAST	ACO2	789	Saccharomyces cerevisiae (strain ATCC 204508 / S288c)	Homocitrate dehydratase, mitochondrial	0	0	15	12
sp|P39980|SIT1_YEAST	P39980	SIT1_YEAST	SIT1	628	Saccharomyces cerevisiae (strain ATCC 204508 / S288c)	Siderophore iron transporter 1	0	0	15	23
sp|P40367|GPI7_YEAST	P40367	GPI7_YEAST	LAS21	830	Saccharomyces cerevisiae (strain ATCC 204508 / S288c)	GPI ethanolamine phosphate transferase 2	0	0	15	18
sp|P40531|GVP36_YEAST	P40531	GVP36_YEAST	GVP36	326	Saccharomyces cerevisiae (strain ATCC 204508 / S288c)	Protein GVP36	1	0	15	21
sp|P41543|OST1_YEAST	P41543	OST1_YEAST	OST1	476	Saccharomyces cerevisiae (strain ATCC 204508 / S288c)	Dolichyl-diphosphooligosaccharide--protein glycosyltransferase subunit 1	0	0	15	19
sp|P46673|NUP85_YEAST	P46673	NUP85_YEAST	NUP85	744	Saccharomyces cerevisiae (strain ATCC 204508 / S288c)	Nucleoporin NUP85	0	0	15	15
sp|P47133|EMC2_YEAST	P47133	EMC2_YEAST	EMC2	292	Saccharomyces cerevisiae (strain ATCC 204508 / S288c)	ER membrane protein complex subunit 2	0	0	15	10
sp|P48570|HOSC_YEAST	P48570	HOSC_YEAST	LYS20	428	Saccharomyces cerevisiae (strain ATCC 204508 / S288c)	Homocitrate synthase, cytosolic isozyme	9	0	15	15
sp|Q03558|OYE2_YEAST	Q03558	OYE2_YEAST	OYE2	400	Saccharomyces cerevisiae (strain ATCC 204508 / S288c)	NADPH dehydrogenase 2	10	5	15	11
sp|Q04080|GPI17_YEAST	Q04080	GPI17_YEAST	GPI17	534	Saccharomyces cerevisiae (strain ATCC 204508 / S288c)	GPI transamidase component GPI17	0	0	15	17
sp|Q05050|EIS1_YEAST	Q05050	EIS1_YEAST	EIS1	843	Saccharomyces cerevisiae (strain ATCC 204508 / S288c)	Eisosome protein 1	0	0	15	20
sp|Q06630|MHR1_YEAST	Q06630	MHR1_YEAST	MHR1	226	Saccharomyces cerevisiae (strain ATCC 204508 / S288c)	Large ribosomal subunit protein mL67	0	0	15	11
sp|A6ZM32|RCF1_YEAS7	A6ZM32	RCF1_YEAS7	RCF1	159	Saccharomyces cerevisiae (strain YJM789)	Respiratory supercomplex factor 1, mitochondrial	0	0	14	11
sp|A6ZQJ1|IF4A_YEAS7	A6ZQJ1	IF4A_YEAS7	TIF1	395	Saccharomyces cerevisiae (strain YJM789)	ATP-dependent RNA helicase eIF4A	12	0	14	12
sp|A6ZZV7|LAC1_YEAS7	A6ZZV7	LAC1_YEAS7	LAC1	418	Saccharomyces cerevisiae (strain YJM789)	Sphingosine N-acyltransferase LAC1	1	0	14	21
sp|P05738|RL9A_YEAST	P05738	RL9A_YEAST	RPL9A	191	Saccharomyces cerevisiae (strain ATCC 204508 / S288c)	Large ribosomal subunit protein uL6A	1	0	14	11
sp|P05755|RS9B_YEAST	P05755	RS9B_YEAST	RPS9B	195	Saccharomyces cerevisiae (strain ATCC 204508 / S288c)	Small ribosomal subunit protein uS4B	0	0	14	8
sp|P0CX39|RS8A_YEAST	P0CX39	RS8A_YEAST	RPS8A	200	Saccharomyces cerevisiae (strain ATCC 204508 / S288c)	Small ribosomal subunit protein eS8A	6	6	14	16
sp|P19657|PMA2_YEAST	P19657	PMA2_YEAST	PMA2	947	Saccharomyces cerevisiae (strain ATCC 204508 / S288c)	Plasma membrane ATPase 2	2	0	14	10
sp|P25045|LCB1_YEAST	P25045	LCB1_YEAST	LCB1	558	Saccharomyces cerevisiae (strain ATCC 204508 / S288c)	Serine palmitoyltransferase 1	0	0	14	11
sp|P25694|CDC48_YEAST	P25694	CDC48_YEAST	CDC48	835	Saccharomyces cerevisiae (strain ATCC 204508 / S288c)	Cell division control protein 48	1	0	14	20
sp|P27810|KTR1_YEAST	P27810	KTR1_YEAST	KTR1	393	Saccharomyces cerevisiae (strain ATCC 204508 / S288c)	Alpha-1,2 mannosyltransferase KTR1	0	0	14	8
sp|P28737|MSP1_YEAST	P28737	MSP1_YEAST	MSP1	362	Saccharomyces cerevisiae (strain ATCC 204508 / S288c)	Outer mitochondrial transmembrane helix translocase	0	0	14	15
sp|P32339|HMX1_YEAST	P32339	HMX1_YEAST	HMX1	317	Saccharomyces cerevisiae (strain ATCC 204508 / S288c)	Heme-binding protein HMX1	0	0	14	15
sp|P32353|ERG3_YEAST	P32353	ERG3_YEAST	ERG3	365	Saccharomyces cerevisiae (strain ATCC 204508 / S288c)	Delta(7)-sterol 5(6)-desaturase ERG3	0	0	14	25
sp|P32378|COQ2_YEAST	P32378	COQ2_YEAST	COQ2	372	Saccharomyces cerevisiae (strain ATCC 204508 / S288c)	4-hydroxybenzoate polyprenyltransferase, mitochondrial	0	0	14	14
sp|P32473|ODPB_YEAST	P32473	ODPB_YEAST	PDB1	366	Saccharomyces cerevisiae (strain ATCC 204508 / S288c)	Pyruvate dehydrogenase E1 component subunit beta, mitochondrial	3	0	14	14
sp|P34224|YBF9_YEAST	P34224	YBF9_YEAST	YBL059W	193	Saccharomyces cerevisiae (strain ATCC 204508 / S288c)	Uncharacterized protein YBL059W	0	0	14	10
sp|P39004|HXT7_YEAST	P39004	HXT7_YEAST	HXT7	570	Saccharomyces cerevisiae (strain ATCC 204508 / S288c)	High-affinity hexose transporter HXT7	3	0	14	13
sp|P40012|PPOX_YEAST	P40012	PPOX_YEAST	HEM14	539	Saccharomyces cerevisiae (strain ATCC 204508 / S288c)	Protoporphyrinogen oxidase	0	0	14	15
sp|P43561|FET5_YEAST	P43561	FET5_YEAST	FET5	622	Saccharomyces cerevisiae (strain ATCC 204508 / S288c)	Iron transport multicopper oxidase FET5	0	0	14	18
sp|P47045|TIM54_YEAST	P47045	TIM54_YEAST	TIM54	478	Saccharomyces cerevisiae (strain ATCC 204508 / S288c)	Mitochondrial import inner membrane translocase subunit TIM54	0	0	14	14
sp|P49687|NU145_YEAST	P49687	NU145_YEAST	NUP145	1317	Saccharomyces cerevisiae (strain ATCC 204508 / S288c)	Nucleoporin NUP145	1	0	14	13
sp|P50110|SAM37_YEAST	P50110	SAM37_YEAST	SAM37	327	Saccharomyces cerevisiae (strain ATCC 204508 / S288c)	Sorting assembly machinery 37 kDa subunit	0	0	14	9
sp|P53184|PNC1_YEAST	P53184	PNC1_YEAST	PNC1	216	Saccharomyces cerevisiae (strain ATCC 204508 / S288c)	Nicotinamidase	0	0	14	6
sp|P53252|PIL1_YEAST	P53252	PIL1_YEAST	PIL1	339	Saccharomyces cerevisiae (strain ATCC 204508 / S288c)	Sphingolipid long chain base-responsive protein PIL1	3	0	14	26
sp|P53318|COQ6_YEAST	P53318	COQ6_YEAST	COQ6	479	Saccharomyces cerevisiae (strain ATCC 204508 / S288c)	Ubiquinone biosynthesis monooxygenase COQ6, mitochondrial	0	0	14	12
sp|P53337|ERV29_YEAST	P53337	ERV29_YEAST	ERV29	310	Saccharomyces cerevisiae (strain ATCC 204508 / S288c)	ER-derived vesicles protein ERV29	4	0	14	15
sp|P54781|ERG5_YEAST	P54781	ERG5_YEAST	ERG5	538	Saccharomyces cerevisiae (strain ATCC 204508 / S288c)	C-22 sterol desaturase ERG5	0	0	14	16
sp|Q06143|DIC1_YEAST	Q06143	DIC1_YEAST	DIC1	298	Saccharomyces cerevisiae (strain ATCC 204508 / S288c)	Mitochondrial dicarboxylate transporter	2	0	14	27
sp|Q07349|MRX9_YEAST	Q07349	MRX9_YEAST	MRX9	420	Saccharomyces cerevisiae (strain ATCC 204508 / S288c)	MIOREX complex component 9	0	0	14	6
sp|Q12407|YD199_YEAST	Q12407	YD199_YEAST	YDL199C	687	Saccharomyces cerevisiae (strain ATCC 204508 / S288c)	Putative metabolite transport protein YDL199C	0	0	14	11
sp|Q12462|PEX11_YEAST	Q12462	PEX11_YEAST	PEX11	236	Saccharomyces cerevisiae (strain ATCC 204508 / S288c)	Peroxisomal membrane protein PMP27	1	0	14	14
sp|Q12482|AGC1_YEAST	Q12482	AGC1_YEAST	AGC1	902	Saccharomyces cerevisiae (strain ATCC 204508 / S288c)	Mitochondrial aspartate-glutamate transporter AGC1	0	0	14	17
sp|B3LQG6|AIM24_YEAS1	B3LQG6	AIM24_YEAS1	AIM24	394	Saccharomyces cerevisiae (strain RM11-1a)	Altered inheritance of mitochondria protein 24, mitochondrial	0	0	13	13
sp|P04710|ADT1_YEAST	P04710	ADT1_YEAST	AAC1	309	Saccharomyces cerevisiae (strain ATCC 204508 / S288c)	ADP,ATP carrier protein 1	0	0	13	16
sp|P05375|PLMT_YEAST	P05375	PLMT_YEAST	OPI3	206	Saccharomyces cerevisiae (strain ATCC 204508 / S288c)	Phosphatidyl-N-methylethanolamine N-methyltransferase	1	0	13	21
sp|P05748|RL15A_YEAST	P05748	RL15A_YEAST	RPL15A	204	Saccharomyces cerevisiae (strain ATCC 204508 / S288c)	Large ribosomal subunit protein eL15A	9	12	13	12
sp|P05759|RS31_YEAST	P05759	RS31_YEAST	RPS31	152	Saccharomyces cerevisiae (strain ATCC 204508 / S288c)	Ubiquitin-ribosomal protein eS31 fusion protein	10	9	13	23
sp|P07246|ADH3_YEAST	P07246	ADH3_YEAST	ADH3	375	Saccharomyces cerevisiae (strain ATCC 204508 / S288c)	Alcohol dehydrogenase 3, mitochondrial	10	2	13	19
sp|P0CX35|RS4A_YEAST	P0CX35	RS4A_YEAST	RPS4A	261	Saccharomyces cerevisiae (strain ATCC 204508 / S288c)	Small ribosomal subunit protein eS4A	2	0	13	16
sp|P0CX84|RL35A_YEAST	P0CX84	RL35A_YEAST	RPL35A	120	Saccharomyces cerevisiae (strain ATCC 204508 / S288c)	Large ribosomal subunit protein uL29A	0	0	13	13
sp|P10823|GPA2_YEAST	P10823	GPA2_YEAST	GPA2	449	Saccharomyces cerevisiae (strain ATCC 204508 / S288c)	Guanine nucleotide-binding protein alpha-2 subunit	0	0	13	25
sp|P18411|FUN14_YEAST	P18411	FUN14_YEAST	FUN14	198	Saccharomyces cerevisiae (strain ATCC 204508 / S288c)	Protein FUN14	0	0	13	10
sp|P18759|SEC18_YEAST	P18759	SEC18_YEAST	SEC18	758	Saccharomyces cerevisiae (strain ATCC 204508 / S288c)	Vesicular-fusion protein SEC18	1	0	13	15
sp|P21825|SEC62_YEAST	P21825	SEC62_YEAST	SEC62	274	Saccharomyces cerevisiae (strain ATCC 204508 / S288c)	Translocation protein SEC62	4	0	13	14
sp|P32317|AFG1_YEAST	P32317	AFG1_YEAST	AFG1	509	Saccharomyces cerevisiae (strain ATCC 204508 / S288c)	Protein AFG1	2	0	13	9
sp|P32419|MDHP_YEAST	P32419	MDHP_YEAST	MDH3	343	Saccharomyces cerevisiae (strain ATCC 204508 / S288c)	Malate dehydrogenase, peroxisomal	3	1	13	17
sp|P32874|HFA1_YEAST	P32874	HFA1_YEAST	HFA1	2273	Saccharomyces cerevisiae (strain ATCC 204508 / S288c)	Acetyl-CoA carboxylase, mitochondrial	89	58	13	18
sp|P34222|PTH2_YEAST	P34222	PTH2_YEAST	PTH2	208	Saccharomyces cerevisiae (strain ATCC 204508 / S288c)	Peptidyl-tRNA hydrolase 2	1	0	13	11
sp|P34251|YKK7_YEAST	P34251	YKK7_YEAST	YKL107W	309	Saccharomyces cerevisiae (strain ATCC 204508 / S288c)	Uncharacterized oxidoreductase YKL107W	2	1	13	6
sp|P36008|EF1G2_YEAST	P36008	EF1G2_YEAST	TEF4	412	Saccharomyces cerevisiae (strain ATCC 204508 / S288c)	Elongation factor 1-gamma 2	0	0	13	23
sp|P36051|MCD4_YEAST	P36051	MCD4_YEAST	MCD4	919	Saccharomyces cerevisiae (strain ATCC 204508 / S288c)	GPI ethanolamine phosphate transferase 1	0	0	13	13
sp|P37296|VPP2_YEAST	P37296	VPP2_YEAST	STV1	890	Saccharomyces cerevisiae (strain ATCC 204508 / S288c)	V-type proton ATPase subunit a, Golgi isoform	0	0	13	15
sp|P38137|FAT2_YEAST	P38137	FAT2_YEAST	PCS60	543	Saccharomyces cerevisiae (strain ATCC 204508 / S288c)	Oxalate--CoA ligase	0	0	13	11
sp|P38152|TXTP_YEAST	P38152	TXTP_YEAST	CTP1	299	Saccharomyces cerevisiae (strain ATCC 204508 / S288c)	Tricarboxylate transport protein	0	0	13	13
sp|P38172|MRX3_YEAST	P38172	MRX3_YEAST	MRX3	270	Saccharomyces cerevisiae (strain ATCC 204508 / S288c)	MIOREX complex component 3	0	0	13	10
sp|P38179|ALG3_YEAST	P38179	ALG3_YEAST	ALG3	458	Saccharomyces cerevisiae (strain ATCC 204508 / S288c)	Dol-P-Man:Man(5)GlcNAc(2)-PP-Dol alpha-1,3-mannosyltransferase	0	0	13	7
sp|P38244|PFF1_YEAST	P38244	PFF1_YEAST	PFF1	976	Saccharomyces cerevisiae (strain ATCC 204508 / S288c)	Vacuolar membrane protease	0	0	13	12
sp|P39515|TIM17_YEAST	P39515	TIM17_YEAST	TIM17	158	Saccharomyces cerevisiae (strain ATCC 204508 / S288c)	Mitochondrial import inner membrane translocase subunit TIM17	1	0	13	16
sp|P39962|KC13_YEAST	P39962	KC13_YEAST	YCK3	524	Saccharomyces cerevisiae (strain ATCC 204508 / S288c)	Casein kinase I homolog 3	4	0	13	11
sp|P40008|FMP52_YEAST	P40008	FMP52_YEAST	FMP52	231	Saccharomyces cerevisiae (strain ATCC 204508 / S288c)	Protein FMP52, mitochondrial	0	0	13	8
sp|P40024|ARB1_YEAST	P40024	ARB1_YEAST	ARB1	610	Saccharomyces cerevisiae (strain ATCC 204508 / S288c)	ABC transporter ATP-binding protein ARB1	1	0	13	10
sp|P40185|MMF1_YEAST	P40185	MMF1_YEAST	MMF1	145	Saccharomyces cerevisiae (strain ATCC 204508 / S288c)	Protein MMF1, mitochondrial	2	4	13	12
sp|P40501|AVT7_YEAST	P40501	AVT7_YEAST	AVT7	490	Saccharomyces cerevisiae (strain ATCC 204508 / S288c)	Vacuolar amino acid transporter 7	0	0	13	20
sp|P43613|ERJ5_YEAST	P43613	ERJ5_YEAST	ERJ5	295	Saccharomyces cerevisiae (strain ATCC 204508 / S288c)	ER-localized J domain-containing protein 5	0	0	13	12
sp|P53008|CWH41_YEAST	P53008	CWH41_YEAST	CWH41	833	Saccharomyces cerevisiae (strain ATCC 204508 / S288c)	Mannosyl-oligosaccharide glucosidase	0	0	13	14
sp|P53134|YGL4_YEAST	P53134	YGL4_YEAST	YGL114W	725	Saccharomyces cerevisiae (strain ATCC 204508 / S288c)	Putative oligopeptide transporter YGL114W	0	0	13	12
sp|P53320|MTM1_YEAST	P53320	MTM1_YEAST	MTM1	366	Saccharomyces cerevisiae (strain ATCC 204508 / S288c)	Mitochondrial carrier protein MTM1	0	0	13	18
sp|Q02753|RL21A_YEAST	Q02753	RL21A_YEAST	RPL21A	160	Saccharomyces cerevisiae (strain ATCC 204508 / S288c)	Large ribosomal subunit protein eL21A	4	0	13	11
sp|Q04991|FMP42_YEAST	Q04991	FMP42_YEAST	FMP42	504	Saccharomyces cerevisiae (strain ATCC 204508 / S288c)	Protein FMP42	0	0	13	14
sp|Q06142|IMB1_YEAST	Q06142	IMB1_YEAST	KAP95	861	Saccharomyces cerevisiae (strain ATCC 204508 / S288c)	Importin subunit beta-1	0	0	13	14
sp|Q06405|ATPK_YEAST	Q06405	ATPK_YEAST	ATP17	101	Saccharomyces cerevisiae (strain ATCC 204508 / S288c)	ATP synthase subunit f, mitochondrial	0	0	13	13
sp|Q06408|ARO10_YEAST	Q06408	ARO10_YEAST	ARO10	635	Saccharomyces cerevisiae (strain ATCC 204508 / S288c)	Transaminated amino acid decarboxylase	0	0	13	8
sp|Q07653|HBT1_YEAST	Q07653	HBT1_YEAST	HBT1	1046	Saccharomyces cerevisiae (strain ATCC 204508 / S288c)	Protein HBT1	0	0	13	21
sp|Q08001|LAM6_YEAST	Q08001	LAM6_YEAST	LAM6	693	Saccharomyces cerevisiae (strain ATCC 204508 / S288c)	Membrane-anchored lipid-binding protein LAM6	0	0	13	12
sp|Q08905|FRE3_YEAST	Q08905	FRE3_YEAST	FRE3	711	Saccharomyces cerevisiae (strain ATCC 204508 / S288c)	Ferric reductase transmembrane component 3	0	0	13	16
sp|Q08960|TYW1_YEAST	Q08960	TYW1_YEAST	TYW1	810	Saccharomyces cerevisiae (strain ATCC 204508 / S288c)	S-adenosyl-L-methionine-dependent tRNA 4-demethylwyosine synthase	0	0	13	10
sp|Q12246|LCB4_YEAST	Q12246	LCB4_YEAST	LCB4	624	Saccharomyces cerevisiae (strain ATCC 204508 / S288c)	Sphingoid long chain base kinase 4	0	0	13	10
sp|Q12333|FRE7_YEAST	Q12333	FRE7_YEAST	FRE7	620	Saccharomyces cerevisiae (strain ATCC 204508 / S288c)	Ferric/cupric reductase transmembrane component 7	1	0	13	11
sp|A6ZLK2|MIC12_YEAS7	A6ZLK2	MIC12_YEAS7	AIM5	106	Saccharomyces cerevisiae (strain YJM789)	MICOS complex subunit MIC12	0	0	12	10
sp|A6ZXL1|S2538_YEAS7	A6ZXL1	S2538_YEAS7	SCY_0799	307	Saccharomyces cerevisiae (strain YJM789)	Mitochondrial glycine transporter	0	0	12	10
sp|A7A0F9|MDM10_YEAS7	A7A0F9	MDM10_YEAS7	MDM10	493	Saccharomyces cerevisiae (strain YJM789)	Mitochondrial distribution and morphology protein 10	0	0	12	14
sp|P02406|RL28_YEAST	P02406	RL28_YEAST	RPL28	149	Saccharomyces cerevisiae (strain ATCC 204508 / S288c)	Large ribosomal subunit protein uL15	4	5	12	12
sp|P05317|RLA0_YEAST	P05317	RLA0_YEAST	RPP0	312	Saccharomyces cerevisiae (strain ATCC 204508 / S288c)	Large ribosomal subunit protein uL10	2	0	12	11
sp|P0CX53|RL12A_YEAST	P0CX53	RL12A_YEAST	RPL12A	165	Saccharomyces cerevisiae (strain ATCC 204508 / S288c)	Large ribosomal subunit protein uL11A	5	0	12	5
sp|P0CX82|RL19A_YEAST	P0CX82	RL19A_YEAST	RPL19A	189	Saccharomyces cerevisiae (strain ATCC 204508 / S288c)	Large ribosomal subunit protein eL19A	2	3	12	8
sp|P12695|ODP2_YEAST	P12695	ODP2_YEAST	LAT1	482	Saccharomyces cerevisiae (strain ATCC 204508 / S288c)	Dihydrolipoyllysine-residue acetyltransferase component of pyruvate dehydrogenase complex, mitochondrial	1	0	12	15
sp|P21560|CBP3_YEAST	P21560	CBP3_YEAST	CBP3	335	Saccharomyces cerevisiae (strain ATCC 204508 / S288c)	Protein CBP3, mitochondrial	0	0	12	11
sp|P21965|MCK1_YEAST	P21965	MCK1_YEAST	MCK1	375	Saccharomyces cerevisiae (strain ATCC 204508 / S288c)	Protein kinase MCK1	0	0	12	11
sp|P23292|KC12_YEAST	P23292	KC12_YEAST	YCK2	546	Saccharomyces cerevisiae (strain ATCC 204508 / S288c)	Casein kinase I homolog 2	3	0	12	18
sp|P25443|RS2_YEAST	P25443	RS2_YEAST	RPS2	254	Saccharomyces cerevisiae (strain ATCC 204508 / S288c)	Small ribosomal subunit protein uS5	1	1	12	6
sp|P32503|GAG_SCVLA	P32503	GAG_SCVLA	gag	680	Saccharomyces cerevisiae virus L-A	Major capsid protein	5	0	12	9
sp|P32598|PP12_YEAST	P32598	PP12_YEAST	GLC7	312	Saccharomyces cerevisiae (strain ATCC 204508 / S288c)	Serine/threonine-protein phosphatase PP1-2	0	0	12	6
sp|P32842|VATL2_YEAST	P32842	VATL2_YEAST	VMA11	164	Saccharomyces cerevisiae (strain ATCC 204508 / S288c)	V-type proton ATPase subunit c'	1	0	12	6
sp|P32939|YPT7_YEAST	P32939	YPT7_YEAST	YPT7	208	Saccharomyces cerevisiae (strain ATCC 204508 / S288c)	Ypt/Rab-type GTPase YPT7	6	0	12	20
sp|P36015|YKT6_YEAST	P36015	YKT6_YEAST	YKT6	200	Saccharomyces cerevisiae (strain ATCC 204508 / S288c)	Synaptobrevin homolog YKT6	0	0	12	9
sp|P38079|YRO2_YEAST	P38079	YRO2_YEAST	YRO2	344	Saccharomyces cerevisiae (strain ATCC 204508 / S288c)	Protein YRO2	5	6	12	13
sp|P38138|GLU2A_YEAST	P38138	GLU2A_YEAST	ROT2	954	Saccharomyces cerevisiae (strain ATCC 204508 / S288c)	Glucosidase 2 subunit alpha	0	0	12	8
sp|P38297|FZO1_YEAST	P38297	FZO1_YEAST	FZO1	855	Saccharomyces cerevisiae (strain ATCC 204508 / S288c)	Mitofusin FZO1	0	0	12	12
sp|P38355|YB8B_YEAST	P38355	YB8B_YEAST	YBR287W	427	Saccharomyces cerevisiae (strain ATCC 204508 / S288c)	Uncharacterized transporter YBR287W	0	0	12	6
sp|P38968|SEC31_YEAST	P38968	SEC31_YEAST	SEC31	1273	Saccharomyces cerevisiae (strain ATCC 204508 / S288c)	Protein transport protein SEC31	0	0	12	10
sp|P39926|SSO2_YEAST	P39926	SSO2_YEAST	SSO2	295	Saccharomyces cerevisiae (strain ATCC 204508 / S288c)	Protein SSO2	3	0	12	10
sp|P40207|ERG29_YEAST	P40207	ERG29_YEAST	ERG29	237	Saccharomyces cerevisiae (strain ATCC 204508 / S288c)	Ergosterol biosynthesis protein 29	0	0	12	15
sp|P40509|COPE_YEAST	P40509	COPE_YEAST	SEC28	296	Saccharomyces cerevisiae (strain ATCC 204508 / S288c)	Coatomer subunit epsilon	15	12	12	13
sp|P40527|ATC7_YEAST	P40527	ATC7_YEAST	NEO1	1151	Saccharomyces cerevisiae (strain ATCC 204508 / S288c)	Phospholipid-transporting ATPase NEO1	0	0	12	13
sp|P48439|OST3_YEAST	P48439	OST3_YEAST	OST3	350	Saccharomyces cerevisiae (strain ATCC 204508 / S288c)	Dolichyl-diphosphooligosaccharide--protein glycosyltransferase subunit 3	0	0	12	7
sp|P50076|ALG10_YEAST	P50076	ALG10_YEAST	DIE2	525	Saccharomyces cerevisiae (strain ATCC 204508 / S288c)	Dol-P-Glc:Glc(2)Man(9)GlcNAc(2)-PP-Dol alpha-1,2-glucosyltransferase	0	0	12	4
sp|P53629|ARE2_YEAST	P53629	ARE2_YEAST	ARE2	642	Saccharomyces cerevisiae (strain ATCC 204508 / S288c)	Sterol O-acyltransferase 2	0	0	12	11
sp|P53736|YN8O_YEAST	P53736	YN8O_YEAST	YNR040W	256	Saccharomyces cerevisiae (strain ATCC 204508 / S288c)	Uncharacterized protein YNR040W	0	0	12	11
sp|P53847|DSL1_YEAST	P53847	DSL1_YEAST	DSL1	754	Saccharomyces cerevisiae (strain ATCC 204508 / S288c)	Protein transport protein DSL1	0	0	12	10
sp|P53879|RHO5_YEAST	P53879	RHO5_YEAST	RHO5	331	Saccharomyces cerevisiae (strain ATCC 204508 / S288c)	GTP-binding protein RHO5	1	0	12	21
sp|P80967|TOM5_YEAST	P80967	TOM5_YEAST	TOM5	50	Saccharomyces cerevisiae (strain ATCC 204508 / S288c)	Mitochondrial import receptor subunit TOM5	0	0	12	14
sp|Q01574|ACS1_YEAST	Q01574	ACS1_YEAST	ACS1	713	Saccharomyces cerevisiae (strain ATCC 204508 / S288c)	Acetyl-coenzyme A synthetase 1	0	0	12	9
sp|Q03921|DOP1_YEAST	Q03921	DOP1_YEAST	DOP1	1698	Saccharomyces cerevisiae (strain ATCC 204508 / S288c)	Protein dopey	2	0	12	23
sp|Q05359|ERP1_YEAST	Q05359	ERP1_YEAST	ERP1	219	Saccharomyces cerevisiae (strain ATCC 204508 / S288c)	Protein ERP1	0	0	12	8
sp|Q06451|TPO3_YEAST	Q06451	TPO3_YEAST	TPO3	622	Saccharomyces cerevisiae (strain ATCC 204508 / S288c)	Polyamine transporter 3	0	0	12	10
sp|Q06567|MCP2_YEAST	Q06567	MCP2_YEAST	MCP2	569	Saccharomyces cerevisiae (strain ATCC 204508 / S288c)	ABC1 family protein MCP2	0	0	12	16
sp|Q08970|MMT2_YEAST	Q08970	MMT2_YEAST	MMT2	484	Saccharomyces cerevisiae (strain ATCC 204508 / S288c)	Mitochondrial metal transporter 2	0	0	12	16
sp|Q12233|ATPN_YEAST	Q12233	ATPN_YEAST	ATP20	115	Saccharomyces cerevisiae (strain ATCC 204508 / S288c)	ATP synthase subunit g, mitochondrial	5	2	12	19
sp|Q3E7B6|VA0E_YEAST	Q3E7B6	VA0E_YEAST	VMA9	73	Saccharomyces cerevisiae (strain ATCC 204508 / S288c)	V-type proton ATPase subunit e	0	0	12	7
sp|A6ZP47|DED1_YEAS7	A6ZP47	DED1_YEAS7	DED1	604	Saccharomyces cerevisiae (strain YJM789)	ATP-dependent RNA helicase DED1	0	0	11	12
sp|A6ZUM5|RSSA1_YEAS7	A6ZUM5	RSSA1_YEAS7	RPS0A	252	Saccharomyces cerevisiae (strain YJM789)	Small ribosomal subunit protein uS2A	0	0	11	6
sp|A7A1V9|RM04_YEAS7	A7A1V9	RM04_YEAS7	MRPL4	319	Saccharomyces cerevisiae (strain YJM789)	Large ribosomal subunit protein uL29m	0	0	11	12
sp|B3LJ06|AIM39_YEAS1	B3LJ06	AIM39_YEAS1	AIM39	395	Saccharomyces cerevisiae (strain RM11-1a)	Altered inheritance of mitochondria protein 39, mitochondrial	0	0	11	15
sp|B3LM39|YIM1_YEAS1	B3LM39	YIM1_YEAS1	YIM1	365	Saccharomyces cerevisiae (strain RM11-1a)	Protein YIM1	1	0	11	18
sp|P00854|ATP6_YEAST	P00854	ATP6_YEAST	ATP6	259	Saccharomyces cerevisiae (strain ATCC 204508 / S288c)	ATP synthase subunit a	0	0	11	7
sp|P05756|RS13_YEAST	P05756	RS13_YEAST	RPS13	151	Saccharomyces cerevisiae (strain ATCC 204508 / S288c)	Small ribosomal subunit protein uS15	0	0	11	9
sp|P06197|PIS_YEAST	P06197	PIS_YEAST	PIS1	220	Saccharomyces cerevisiae (strain ATCC 204508 / S288c)	CDP-diacylglycerol--inositol 3-phosphatidyltransferase	0	0	11	13
sp|P11914|MPPA_YEAST	P11914	MPPA_YEAST	MAS2	482	Saccharomyces cerevisiae (strain ATCC 204508 / S288c)	Mitochondrial-processing peptidase subunit alpha	0	0	11	11
sp|P14693|SAM35_YEAST	P14693	SAM35_YEAST	SAM35	329	Saccharomyces cerevisiae (strain ATCC 204508 / S288c)	Sorting assembly machinery 35 kDa subunit	0	0	11	7
sp|P16661|ALG1_YEAST	P16661	ALG1_YEAST	ALG1	449	Saccharomyces cerevisiae (strain ATCC 204508 / S288c)	Chitobiosyldiphosphodolichol beta-mannosyltransferase	0	0	11	8
sp|P19262|ODO2_YEAST	P19262	ODO2_YEAST	KGD2	463	Saccharomyces cerevisiae (strain ATCC 204508 / S288c)	Dihydrolipoyllysine-residue succinyltransferase component of 2-oxoglutarate dehydrogenase complex, mitochondrial	0	0	11	4
sp|P23500|MRS4_YEAST	P23500	MRS4_YEAST	MRS4	304	Saccharomyces cerevisiae (strain ATCC 204508 / S288c)	Mitochondrial RNA-splicing protein MRS4	0	0	11	12
sp|P27929|NAM9_YEAST	P27929	NAM9_YEAST	NAM9	486	Saccharomyces cerevisiae (strain ATCC 204508 / S288c)	Small ribosomal subunit protein uS4m	0	0	11	8
sp|P31688|TPS2_YEAST	P31688	TPS2_YEAST	TPS2	896	Saccharomyces cerevisiae (strain ATCC 204508 / S288c)	Trehalose-phosphatase	1	0	11	14
sp|P32462|ERG24_YEAST	P32462	ERG24_YEAST	ERG24	438	Saccharomyces cerevisiae (strain ATCC 204508 / S288c)	Delta(14)-sterol reductase ERG24	1	0	11	9
sp|P32476|ERG1_YEAST	P32476	ERG1_YEAST	ERG1	496	Saccharomyces cerevisiae (strain ATCC 204508 / S288c)	Squalene epoxidase ERG1	0	0	11	10
sp|P32611|RML2_YEAST	P32611	RML2_YEAST	RML2	393	Saccharomyces cerevisiae (strain ATCC 204508 / S288c)	Large ribosomal subunit protein uL2m	1	0	11	6
sp|P38142|YB91_YEAST	P38142	YB91_YEAST	YBR241C	488	Saccharomyces cerevisiae (strain ATCC 204508 / S288c)	Probable metabolite transport protein YBR241C	0	0	11	13
sp|P38169|KMO_YEAST	P38169	KMO_YEAST	BNA4	460	Saccharomyces cerevisiae (strain ATCC 204508 / S288c)	Kynurenine 3-monooxygenase	0	0	11	9
sp|P38323|CLPX_YEAST	P38323	CLPX_YEAST	MCX1	520	Saccharomyces cerevisiae (strain ATCC 204508 / S288c)	ATP-dependent clpX-like chaperone, mitochondrial	0	0	11	13
sp|P39940|RSP5_YEAST	P39940	RSP5_YEAST	RSP5	809	Saccharomyces cerevisiae (strain ATCC 204508 / S288c)	E3 ubiquitin-protein ligase RSP5	1	0	11	17
sp|P40030|ERG28_YEAST	P40030	ERG28_YEAST	ERG28	148	Saccharomyces cerevisiae (strain ATCC 204508 / S288c)	Ergosterol biosynthetic protein 28	0	0	11	10
sp|P48558|BXI1_YEAST	P48558	BXI1_YEAST	BXI1	297	Saccharomyces cerevisiae (strain ATCC 204508 / S288c)	Bax inhibitor 1	0	0	11	7
sp|P50276|MUP1_YEAST	P50276	MUP1_YEAST	MUP1	574	Saccharomyces cerevisiae (strain ATCC 204508 / S288c)	High-affinity methionine permease	0	0	11	8
sp|P53224|ORM1_YEAST	P53224	ORM1_YEAST	ORM1	222	Saccharomyces cerevisiae (strain ATCC 204508 / S288c)	Protein ORM1	0	0	11	10
sp|P53918|ESBP6_YEAST	P53918	ESBP6_YEAST	ESBP6	673	Saccharomyces cerevisiae (strain ATCC 204508 / S288c)	Uncharacterized transporter ESBP6	0	0	11	13
sp|Q02773|RPM2_YEAST	Q02773	RPM2_YEAST	RPM2	1202	Saccharomyces cerevisiae (strain ATCC 204508 / S288c)	Ribonuclease P protein component, mitochondrial	0	0	11	15
sp|Q08227|INP54_YEAST	Q08227	INP54_YEAST	INP54	384	Saccharomyces cerevisiae (strain ATCC 204508 / S288c)	Phosphatidylinositol 4,5-bisphosphate 5-phosphatase INP54	0	0	11	7
sp|Q12207|NCE2_YEAST	Q12207	NCE2_YEAST	NCE102	173	Saccharomyces cerevisiae (strain ATCC 204508 / S288c)	Non-classical export protein 2	2	2	11	12
sp|Q12480|ETFA_YEAST	Q12480	ETFA_YEAST	AIM45	344	Saccharomyces cerevisiae (strain ATCC 204508 / S288c)	Probable electron transfer flavoprotein subunit alpha, mitochondrial	2	0	11	14
sp|Q12746|PGA3_YEAST	Q12746	PGA3_YEAST	PGA3	312	Saccharomyces cerevisiae (strain ATCC 204508 / S288c)	Plasma membrane-associated coenzyme Q6 reductase PGA3	0	0	11	13
sp|A6ZMD0|TVP18_YEAS7	A6ZMD0	TVP18_YEAS7	TVP18	167	Saccharomyces cerevisiae (strain YJM789)	Golgi apparatus membrane protein TVP18	0	0	10	10
sp|A6ZTA4|AIM18_YEAS7	A6ZTA4	AIM18_YEAS7	AIM18	321	Saccharomyces cerevisiae (strain YJM789)	Altered inheritance of mitochondria protein 18, mitochondrial	0	0	10	3
sp|A6ZTG5|AGP1_YEAS7	A6ZTG5	AGP1_YEAS7	AGP1	633	Saccharomyces cerevisiae (strain YJM789)	General amino acid permease AGP1	0	0	10	5
sp|P0CX23|RL20A_YEAST	P0CX23	RL20A_YEAST	RPL20A	172	Saccharomyces cerevisiae (strain ATCC 204508 / S288c)	Large ribosomal subunit protein eL20A	0	0	10	8
sp|P0CX43|RL1A_YEAST	P0CX43	RL1A_YEAST	RPL1A	217	Saccharomyces cerevisiae (strain ATCC 204508 / S288c)	Large ribosomal subunit protein uL1A	1	0	10	4
sp|P0CX47|RS11A_YEAST	P0CX47	RS11A_YEAST	RPS11A	156	Saccharomyces cerevisiae (strain ATCC 204508 / S288c)	Small ribosomal subunit protein uS17A	0	0	10	11
sp|P0CX55|RS18A_YEAST	P0CX55	RS18A_YEAST	RPS18A	146	Saccharomyces cerevisiae (strain ATCC 204508 / S288c)	Small ribosomal subunit protein uS13A	5	0	10	12
sp|P10662|RT01_YEAST	P10662	RT01_YEAST	MRP1	321	Saccharomyces cerevisiae (strain ATCC 204508 / S288c)	Small ribosomal subunit protein mS43	0	0	10	8
sp|P13587|ATN1_YEAST	P13587	ATN1_YEAST	ENA1	1091	Saccharomyces cerevisiae (strain ATCC 204508 / S288c)	Sodium/potassium exporting P-type ATPase 1	0	0	10	5
sp|P15424|MS116_YEAST	P15424	MS116_YEAST	MSS116	664	Saccharomyces cerevisiae (strain ATCC 204508 / S288c)	ATP-dependent RNA helicase MSS116, mitochondrial	0	0	10	19
sp|P23301|IF5A1_YEAST	P23301	IF5A1_YEAST	HYP2	157	Saccharomyces cerevisiae (strain ATCC 204508 / S288c)	Eukaryotic translation initiation factor 5A-1	0	0	10	11
sp|P25568|ATG22_YEAST	P25568	ATG22_YEAST	ATG22	528	Saccharomyces cerevisiae (strain ATCC 204508 / S288c)	Autophagy-related protein 22	0	0	10	8
sp|P32796|CACP_YEAST	P32796	CACP_YEAST	CAT2	670	Saccharomyces cerevisiae (strain ATCC 204508 / S288c)	Carnitine O-acetyltransferase, mitochondrial	0	0	10	9
sp|P33891|TIP20_YEAST	P33891	TIP20_YEAST	TIP20	701	Saccharomyces cerevisiae (strain ATCC 204508 / S288c)	Protein transport protein TIP20	0	0	10	6
sp|P35169|TOR1_YEAST	P35169	TOR1_YEAST	TOR1	2470	Saccharomyces cerevisiae (strain ATCC 204508 / S288c)	Serine/threonine-protein kinase TOR1	0	0	10	6
sp|P35997|RS27A_YEAST	P35997	RS27A_YEAST	RPS27A	82	Saccharomyces cerevisiae (strain ATCC 204508 / S288c)	Small ribosomal subunit protein eS27A	5	0	10	11
sp|P37291|GLYC_YEAST	P37291	GLYC_YEAST	SHM2	469	Saccharomyces cerevisiae (strain ATCC 204508 / S288c)	Serine hydroxymethyltransferase, cytosolic	0	0	10	13
sp|P37299|QCR10_YEAST	P37299	QCR10_YEAST	QCR10	77	Saccharomyces cerevisiae (strain ATCC 204508 / S288c)	Cytochrome b-c1 complex subunit 10, mitochondrial	0	0	10	14
sp|P38361|PHO89_YEAST	P38361	PHO89_YEAST	PHO89	574	Saccharomyces cerevisiae (strain ATCC 204508 / S288c)	Phosphate permease PHO89	0	0	10	9
sp|P39103|COX14_YEAST	P39103	COX14_YEAST	COX14	70	Saccharomyces cerevisiae (strain ATCC 204508 / S288c)	Cytochrome c oxidase assembly protein COX14	0	0	10	9
sp|P40351|ALG8_YEAST	P40351	ALG8_YEAST	ALG8	577	Saccharomyces cerevisiae (strain ATCC 204508 / S288c)	Dolichyl pyrophosphate Glc1Man9GlcNAc2 alpha-1,3-glucosyltransferase	0	0	10	7
sp|P40483|YIK8_YEAST	P40483	YIK8_YEAST	YIL108W	696	Saccharomyces cerevisiae (strain ATCC 204508 / S288c)	Putative zinc metalloproteinase YIL108W	0	0	10	19
sp|P40582|GST1_YEAST	P40582	GST1_YEAST	GTT1	234	Saccharomyces cerevisiae (strain ATCC 204508 / S288c)	Glutathione S-transferase 1	0	0	10	4
sp|P41735|COQ7_YEAST	P41735	COQ7_YEAST	CAT5	233	Saccharomyces cerevisiae (strain ATCC 204508 / S288c)	5-demethoxyubiquinone hydroxylase, mitochondrial	0	0	10	12
sp|P43611|OSW7_YEAST	P43611	OSW7_YEAST	OSW7	510	Saccharomyces cerevisiae (strain ATCC 204508 / S288c)	Outer spore wall protein 7	0	0	10	12
sp|P48015|GCST_YEAST	P48015	GCST_YEAST	GCV1	400	Saccharomyces cerevisiae (strain ATCC 204508 / S288c)	Aminomethyltransferase, mitochondrial	0	0	10	5
sp|P53170|PDK2_YEAST	P53170	PDK2_YEAST	PKP2	491	Saccharomyces cerevisiae (strain ATCC 204508 / S288c)	[Pyruvate dehydrogenase (acetyl-transferring)] kinase 2, mitochondrial	0	0	10	12
sp|P53311|MPC3_YEAST	P53311	MPC3_YEAST	MPC3	146	Saccharomyces cerevisiae (strain ATCC 204508 / S288c)	Mitochondrial pyruvate carrier 3	0	0	10	9
sp|P53622|COPA_YEAST	P53622	COPA_YEAST	COP1	1201	Saccharomyces cerevisiae (strain ATCC 204508 / S288c)	Coatomer subunit alpha	24	7	10	3
sp|Q01163|RT23_YEAST	Q01163	RT23_YEAST	RSM23	450	Saccharomyces cerevisiae (strain ATCC 204508 / S288c)	Small ribosomal subunit protein mS29	0	0	10	15
sp|Q02863|UBP16_YEAST	Q02863	UBP16_YEAST	UBP16	499	Saccharomyces cerevisiae (strain ATCC 204508 / S288c)	Ubiquitin carboxyl-terminal hydrolase 16	0	0	10	7
sp|Q06107|YP114_YEAST	Q06107	YP114_YEAST	YPR114W	315	Saccharomyces cerevisiae (strain ATCC 204508 / S288c)	Uncharacterized TLC domain-containing protein YPR114W	0	0	10	10
sp|Q12382|DGK1_YEAST	Q12382	DGK1_YEAST	DGK1	290	Saccharomyces cerevisiae (strain ATCC 204508 / S288c)	CTP-dependent diacylglycerol kinase 1	0	0	10	4
sp|Q12449|AHA1_YEAST	Q12449	AHA1_YEAST	AHA1	350	Saccharomyces cerevisiae (strain ATCC 204508 / S288c)	Hsp90 co-chaperone AHA1	2	0	10	12
sp|Q96VH5|MIC10_YEAST	Q96VH5	MIC10_YEAST	MIC10	97	Saccharomyces cerevisiae (strain ATCC 204508 / S288c)	MICOS complex subunit MIC10	2	3	10	6
sp|Q99297|ODC2_YEAST	Q99297	ODC2_YEAST	ODC2	307	Saccharomyces cerevisiae (strain ATCC 204508 / S288c)	Mitochondrial 2-oxodicarboxylate carrier 2	0	0	10	10
tr|A0A8H4BY05|A0A8H4BY05_YEASX	A0A8H4BY05	A0A8H4BY05_YEASX	PFK2	959	Saccharomyces cerevisiae	ATP-dependent 6-phosphofructokinase	1	0	10	5
sp|A6ZLF4|SDS24_YEAS7	A6ZLF4	SDS24_YEAS7	SDS24	527	Saccharomyces cerevisiae (strain YJM789)	Protein SDS24	0	0	9	6
sp|A6ZML5|AIM36_YEAS7	A6ZML5	AIM36_YEAS7	AIM36	255	Saccharomyces cerevisiae (strain YJM789)	Altered inheritance of mitochondria protein 36, mitochondrial	4	0	9	16
sp|A6ZP43|MCA1_YEAS7	A6ZP43	MCA1_YEAS7	MCA1	432	Saccharomyces cerevisiae (strain YJM789)	Metacaspase-1	8	0	9	4
sp|P00420|COX3_YEAST	P00420	COX3_YEAST	COX3	269	Saccharomyces cerevisiae (strain ATCC 204508 / S288c)	Cytochrome c oxidase subunit 3	0	0	9	13
sp|P00431|CCPR_YEAST	P00431	CCPR_YEAST	CCP1	361	Saccharomyces cerevisiae (strain ATCC 204508 / S288c)	Cytochrome c peroxidase, mitochondrial	0	0	9	5
sp|P02293|H2B1_YEAST	P02293	H2B1_YEAST	HTB1	131	Saccharomyces cerevisiae (strain ATCC 204508 / S288c)	Histone H2B.1	3	0	9	5
sp|P02309|H4_YEAST	P02309	H4_YEAST	HHF1	103	Saccharomyces cerevisiae (strain ATCC 204508 / S288c)	Histone H4	3	7	9	5
sp|P05453|ERF3_YEAST	P05453	ERF3_YEAST	SUP35	685	Saccharomyces cerevisiae (strain ATCC 204508 / S288c)	Eukaryotic peptide chain release factor GTP-binding subunit	4	0	9	11
sp|P10592|HSP72_YEAST	P10592	HSP72_YEAST	SSA2	639	Saccharomyces cerevisiae (strain ATCC 204508 / S288c)	Heat shock protein SSA2	1	0	9	9
sp|P12688|YPK1_YEAST	P12688	YPK1_YEAST	YPK1	680	Saccharomyces cerevisiae (strain ATCC 204508 / S288c)	Serine/threonine-protein kinase YPK1	0	0	9	13
sp|P15380|PUT4_YEAST	P15380	PUT4_YEAST	PUT4	627	Saccharomyces cerevisiae (strain ATCC 204508 / S288c)	Proline-specific permease	0	0	9	7
sp|P19524|MYO2_YEAST	P19524	MYO2_YEAST	MYO2	1574	Saccharomyces cerevisiae (strain ATCC 204508 / S288c)	Myosin-2	0	0	9	8
sp|P25351|YCR3_YEAST	P25351	YCR3_YEAST	YCR023C	611	Saccharomyces cerevisiae (strain ATCC 204508 / S288c)	Uncharacterized membrane protein YCR023C	0	0	9	10
sp|P25358|ELO2_YEAST	P25358	ELO2_YEAST	ELO2	347	Saccharomyces cerevisiae (strain ATCC 204508 / S288c)	Elongation of fatty acids protein 2	0	0	9	11
sp|P25374|NFS1_YEAST	P25374	NFS1_YEAST	NFS1	497	Saccharomyces cerevisiae (strain ATCC 204508 / S288c)	Cysteine desulfurase, mitochondrial	0	0	9	14
sp|P25605|ILV6_YEAST	P25605	ILV6_YEAST	ILV6	309	Saccharomyces cerevisiae (strain ATCC 204508 / S288c)	Acetolactate synthase small subunit, mitochondrial	1	0	9	9
sp|P28321|MGLL_YEAST	P28321	MGLL_YEAST	YJU3	313	Saccharomyces cerevisiae (strain ATCC 204508 / S288c)	Monoglyceride lipase	1	0	9	8
sp|P32657|CHD1_YEAST	P32657	CHD1_YEAST	CHD1	1468	Saccharomyces cerevisiae (strain ATCC 204508 / S288c)	Chromo domain-containing protein 1	0	0	9	8
sp|P32802|TMN1_YEAST	P32802	TMN1_YEAST	EMP70	667	Saccharomyces cerevisiae (strain ATCC 204508 / S288c)	Transmembrane 9 superfamily member 1	0	0	9	15
sp|P33754|SEC66_YEAST	P33754	SEC66_YEAST	SEC66	206	Saccharomyces cerevisiae (strain ATCC 204508 / S288c)	Translocation protein SEC66	0	0	9	7
sp|P35723|YET1_YEAST	P35723	YET1_YEAST	YET1	206	Saccharomyces cerevisiae (strain ATCC 204508 / S288c)	Endoplasmic reticulum transmembrane protein 1	0	0	9	10
sp|P37293|NAT2_YEAST	P37293	NAT2_YEAST	NAT2	288	Saccharomyces cerevisiae (strain ATCC 204508 / S288c)	Putative N-terminal acetyltransferase 2	0	0	9	11
sp|P38230|QOR_YEAST	P38230	QOR_YEAST	ZTA1	334	Saccharomyces cerevisiae (strain ATCC 204508 / S288c)	Probable quinone oxidoreductase	0	0	9	7
sp|P38300|MBA1_YEAST	P38300	MBA1_YEAST	MBA1	278	Saccharomyces cerevisiae (strain ATCC 204508 / S288c)	Inner membrane mitoribosome receptor MBA1, mitochondrial	0	0	9	6
sp|P38797|PP2C7_YEAST	P38797	PP2C7_YEAST	PTC7	343	Saccharomyces cerevisiae (strain ATCC 204508 / S288c)	Protein phosphatase 2C homolog 7, mitochondrial	0	0	9	18
sp|P38921|PET8_YEAST	P38921	PET8_YEAST	PET8	284	Saccharomyces cerevisiae (strain ATCC 204508 / S288c)	Putative mitochondrial carrier protein PET8	0	0	9	11
sp|P39107|MNN9_YEAST	P39107	MNN9_YEAST	MNN9	395	Saccharomyces cerevisiae (strain ATCC 204508 / S288c)	Mannan polymerase complexes subunit MNN9	0	0	9	7
sp|P39676|FHP_YEAST	P39676	FHP_YEAST	YHB1	399	Saccharomyces cerevisiae (strain ATCC 204508 / S288c)	Flavohemoprotein	0	0	9	14
sp|P40212|RL13B_YEAST	P40212	RL13B_YEAST	RPL13B	199	Saccharomyces cerevisiae (strain ATCC 204508 / S288c)	Large ribosomal subunit protein eL13B	0	0	9	7
sp|P47131|YJ55_YEAST	P47131	YJ55_YEAST	YJR085C	105	Saccharomyces cerevisiae (strain ATCC 204508 / S288c)	TMEM14 protein homolog YJR085C	0	0	9	2
sp|P47818|CCC1_YEAST	P47818	CCC1_YEAST	CCC1	322	Saccharomyces cerevisiae (strain ATCC 204508 / S288c)	Protein CCC1	0	0	9	6
sp|P52593|NU188_YEAST	P52593	NU188_YEAST	NUP188	1655	Saccharomyces cerevisiae (strain ATCC 204508 / S288c)	Nucleoporin NUP188	1	0	9	10
sp|P53878|YNS1_YEAST	P53878	YNS1_YEAST	YNL181W	407	Saccharomyces cerevisiae (strain ATCC 204508 / S288c)	Uncharacterized oxidoreductase YNL181W	8	0	9	12
sp|P54003|SUR7_YEAST	P54003	SUR7_YEAST	SUR7	302	Saccharomyces cerevisiae (strain ATCC 204508 / S288c)	Protein SUR7	1	0	9	8
sp|Q01852|TIM44_YEAST	Q01852	TIM44_YEAST	TIM44	431	Saccharomyces cerevisiae (strain ATCC 204508 / S288c)	Mitochondrial import inner membrane translocase subunit TIM44	0	0	9	9
sp|Q02795|OSTD_YEAST	Q02795	OSTD_YEAST	SWP1	286	Saccharomyces cerevisiae (strain ATCC 204508 / S288c)	Dolichyl-diphosphooligosaccharide--protein glycosyltransferase subunit SWP1	2	0	9	11
sp|Q02883|FMP30_YEAST	Q02883	FMP30_YEAST	FMP30	468	Saccharomyces cerevisiae (strain ATCC 204508 / S288c)	N-acyl-phosphatidylethanolamine-hydrolyzing phospholipase D, mitochondrial	0	0	9	10
sp|Q03362|YD476_YEAST	Q03362	YD476_YEAST	YDR476C	224	Saccharomyces cerevisiae (strain ATCC 204508 / S288c)	Uncharacterized protein YDR476C	0	0	9	14
sp|Q03529|SCS7_YEAST	Q03529	SCS7_YEAST	SCS7	384	Saccharomyces cerevisiae (strain ATCC 204508 / S288c)	Ceramide very long chain fatty acid hydroxylase SCS7	0	0	9	5
sp|Q05779|COQ9_YEAST	Q05779	COQ9_YEAST	COQ9	260	Saccharomyces cerevisiae (strain ATCC 204508 / S288c)	Ubiquinone biosynthesis protein COQ9, mitochondrial	0	0	9	8
sp|Q05787|HRD3_YEAST	Q05787	HRD3_YEAST	HRD3	833	Saccharomyces cerevisiae (strain ATCC 204508 / S288c)	ERAD-associated E3 ubiquitin-protein ligase component HRD3	0	0	9	7
sp|Q06508|LOA1_YEAST	Q06508	LOA1_YEAST	LOA1	300	Saccharomyces cerevisiae (strain ATCC 204508 / S288c)	Lysophosphatidic acid:oleoyl-CoA acyltransferase 1	1	0	9	10
sp|Q07825|FRA1_YEAST	Q07825	FRA1_YEAST	FRA1	749	Saccharomyces cerevisiae (strain ATCC 204508 / S288c)	Putative Xaa-Pro aminopeptidase FRA1	0	0	9	8
sp|Q12165|ATPD_YEAST	Q12165	ATPD_YEAST	ATP16	160	Saccharomyces cerevisiae (strain ATCC 204508 / S288c)	ATP synthase subunit delta, mitochondrial	2	0	9	5
sp|Q12324|YVC1_YEAST	Q12324	YVC1_YEAST	YVC1	675	Saccharomyces cerevisiae (strain ATCC 204508 / S288c)	Calcium channel YVC1	0	0	9	5
sp|Q12372|MMP1_YEAST	Q12372	MMP1_YEAST	MMP1	583	Saccharomyces cerevisiae (strain ATCC 204508 / S288c)	S-methylmethionine permease 1	0	0	9	5
sp|A6ZM02|RS3A2_YEAS7	A6ZM02	RS3A2_YEAS7	RPS1B	255	Saccharomyces cerevisiae (strain YJM789)	Small ribosomal subunit protein eS1B	0	0	8	2
sp|A6ZNQ1|DBP5_YEAS7	A6ZNQ1	DBP5_YEAS7	DBP5	482	Saccharomyces cerevisiae (strain YJM789)	ATP-dependent RNA helicase DBP5	0	0	8	11
sp|A6ZTE8|MGR1_YEAS7	A6ZTE8	MGR1_YEAS7	MGR1	416	Saccharomyces cerevisiae (strain YJM789)	Mitochondrial inner membrane i-AAA protease complex subunit MGR1	0	0	8	7
sp|A6ZUX3|GET1_YEAS7	A6ZUX3	GET1_YEAS7	GET1	235	Saccharomyces cerevisiae (strain YJM789)	Golgi to ER traffic protein 1	0	0	8	11
sp|A6ZY50|TVP23_YEAS7	A6ZY50	TVP23_YEAS7	TVP23	199	Saccharomyces cerevisiae (strain YJM789)	Golgi apparatus membrane protein TVP23	0	0	8	8
sp|P05740|RL17A_YEAST	P05740	RL17A_YEAST	RPL17A	184	Saccharomyces cerevisiae (strain ATCC 204508 / S288c)	Large ribosomal subunit protein uL22A	0	0	8	5
sp|P07255|COX9_YEAST	P07255	COX9_YEAST	COX9	59	Saccharomyces cerevisiae (strain ATCC 204508 / S288c)	Cytochrome c oxidase subunit 9, mitochondrial	0	0	8	8
sp|P07390|PT494_YEAST	P07390	PT494_YEAST	PET494	489	Saccharomyces cerevisiae (strain ATCC 204508 / S288c)	COX3 mRNA-specific translational activator PET494	0	0	8	8
sp|P07806|SYV_YEAST	P07806	SYV_YEAST	VAS1	1104	Saccharomyces cerevisiae (strain ATCC 204508 / S288c)	Valine--tRNA ligase, mitochondrial	0	0	8	5
sp|P09368|PUT1_YEAST	P09368	PUT1_YEAST	PUT1	476	Saccharomyces cerevisiae (strain ATCC 204508 / S288c)	Proline dehydrogenase, mitochondrial	0	0	8	6
sp|P0C5R9|RNK_YEAST	P0C5R9	RNK_YEAST	YPR170W-B	85	Saccharomyces cerevisiae (strain ATCC 204508 / S288c)	V-type proton ATPase subunit f	0	0	8	8
sp|P11491|PPB_YEAST	P11491	PPB_YEAST	PHO8	566	Saccharomyces cerevisiae (strain ATCC 204508 / S288c)	Repressible alkaline phosphatase	0	0	8	12
sp|P27680|COQ3_YEAST	P27680	COQ3_YEAST	COQ3	312	Saccharomyces cerevisiae (strain ATCC 204508 / S288c)	Ubiquinone biosynthesis O-methyltransferase, mitochondrial	0	0	8	7
sp|P32906|MNS1_YEAST	P32906	MNS1_YEAST	MNS1	549	Saccharomyces cerevisiae (strain ATCC 204508 / S288c)	Endoplasmic reticulum mannosyl-oligosaccharide 1,2-alpha-mannosidase	0	0	8	11
sp|P34110|VPS35_YEAST	P34110	VPS35_YEAST	VPS35	944	Saccharomyces cerevisiae (strain ATCC 204508 / S288c)	Vacuolar protein sorting-associated protein 35	0	0	8	9
sp|P36163|OMA1_YEAST	P36163	OMA1_YEAST	OMA1	345	Saccharomyces cerevisiae (strain ATCC 204508 / S288c)	Mitochondrial metalloendopeptidase OMA1	0	0	8	6
sp|P38084|BAP2_YEAST	P38084	BAP2_YEAST	BAP2	609	Saccharomyces cerevisiae (strain ATCC 204508 / S288c)	Leu/Val/Ile amino-acid permease	0	0	8	6
sp|P38090|AGP2_YEAST	P38090	AGP2_YEAST	AGP2	596	Saccharomyces cerevisiae (strain ATCC 204508 / S288c)	General amino acid permease AGP2	0	0	8	7
sp|P38166|SFT2_YEAST	P38166	SFT2_YEAST	SFT2	215	Saccharomyces cerevisiae (strain ATCC 204508 / S288c)	Protein transport protein SFT2	0	0	8	10
sp|P38226|CST26_YEAST	P38226	CST26_YEAST	CST26	397	Saccharomyces cerevisiae (strain ATCC 204508 / S288c)	2-acyl-1-lysophosphatidylinositol acyltransferase	0	0	8	6
sp|P39540|ELO1_YEAST	P39540	ELO1_YEAST	ELO1	310	Saccharomyces cerevisiae (strain ATCC 204508 / S288c)	Elongation of fatty acids protein 1	4	0	8	11
sp|P39932|STL1_YEAST	P39932	STL1_YEAST	STL1	569	Saccharomyces cerevisiae (strain ATCC 204508 / S288c)	Sugar transporter STL1	0	0	8	9
sp|P42940|ETFB_YEAST	P42940	ETFB_YEAST	CIR1	261	Saccharomyces cerevisiae (strain ATCC 204508 / S288c)	Probable electron transfer flavoprotein subunit beta	0	0	8	9
sp|P46965|SPC1_YEAST	P46965	SPC1_YEAST	SPC1	94	Saccharomyces cerevisiae (strain ATCC 204508 / S288c)	Signal peptidase complex subunit 1	0	0	8	12
sp|P48813|GNP1_YEAST	P48813	GNP1_YEAST	GNP1	663	Saccharomyces cerevisiae (strain ATCC 204508 / S288c)	High-affinity glutamine permease	0	0	8	8
sp|P48837|NUP57_YEAST	P48837	NUP57_YEAST	NUP57	541	Saccharomyces cerevisiae (strain ATCC 204508 / S288c)	Nucleoporin NUP57	0	0	8	5
sp|P52891|NUP84_YEAST	P52891	NUP84_YEAST	NUP84	726	Saccharomyces cerevisiae (strain ATCC 204508 / S288c)	Nucleoporin NUP84	0	0	8	7
sp|P53278|YG3A_YEAST	P53278	YG3A_YEAST	YGR130C	816	Saccharomyces cerevisiae (strain ATCC 204508 / S288c)	Uncharacterized protein YGR130C	0	0	8	16
sp|P54074|ASI1_YEAST	P54074	ASI1_YEAST	ASI1	624	Saccharomyces cerevisiae (strain ATCC 204508 / S288c)	ERAD-associated E3 ubiquitin-protein ligase ASI1	0	0	8	10
sp|Q03516|RSN1_YEAST	Q03516	RSN1_YEAST	RSN1	953	Saccharomyces cerevisiae (strain ATCC 204508 / S288c)	Uncharacterized protein RSN1	0	0	8	11
sp|Q03707|SRC1_YEAST	Q03707	SRC1_YEAST	SRC1	834	Saccharomyces cerevisiae (strain ATCC 204508 / S288c)	Inner nuclear membrane protein SRC1	1	0	8	11
sp|Q04472|MGR3_YEAST	Q04472	MGR3_YEAST	MGR3	501	Saccharomyces cerevisiae (strain ATCC 204508 / S288c)	Mitochondrial inner membrane i-AAA protease supercomplex subunit MGR3	0	0	8	9
sp|Q06011|ECM19_YEAST	Q06011	ECM19_YEAST	ECM19	112	Saccharomyces cerevisiae (strain ATCC 204508 / S288c)	Protein ECM19	0	0	8	6
sp|Q06497|ANT1_YEAST	Q06497	ANT1_YEAST	ANT1	328	Saccharomyces cerevisiae (strain ATCC 204508 / S288c)	Peroxisomal adenine nucleotide transporter 1	0	0	8	15
sp|Q12082|YD157_YEAST	Q12082	YD157_YEAST	YDL157C	118	Saccharomyces cerevisiae (strain ATCC 204508 / S288c)	Uncharacterized protein YDL157C, mitochondrial	0	0	8	11
sp|Q12252|PHM7_YEAST	Q12252	PHM7_YEAST	PHM7	991	Saccharomyces cerevisiae (strain ATCC 204508 / S288c)	Phosphate metabolism protein 7	0	0	8	6
sp|Q12289|CRC1_YEAST	Q12289	CRC1_YEAST	CRC1	327	Saccharomyces cerevisiae (strain ATCC 204508 / S288c)	Mitochondrial carnitine carrier	0	0	8	12
sp|A6ZU25|AIM14_YEAS7	A6ZU25	AIM14_YEAS7	AIM14	570	Saccharomyces cerevisiae (strain YJM789)	Probable metalloreductase AIM14	0	0	7	4
sp|A6ZVU2|SEC11_YEAS7	A6ZVU2	SEC11_YEAS7	SEC11	167	Saccharomyces cerevisiae (strain YJM789)	Signal peptidase complex catalytic subunit SEC11	0	0	7	8
sp|A6ZXN8|NUR1_YEAS7	A6ZXN8	NUR1_YEAS7	NUR1	484	Saccharomyces cerevisiae (strain YJM789)	Nuclear rim protein 1	0	0	7	6
sp|P00360|G3P1_YEAST	P00360	G3P1_YEAST	TDH1	332	Saccharomyces cerevisiae (strain ATCC 204508 / S288c)	Glyceraldehyde-3-phosphate dehydrogenase 1	4	0	7	10
sp|P02407|RS17A_YEAST	P02407	RS17A_YEAST	RPS17A	136	Saccharomyces cerevisiae (strain ATCC 204508 / S288c)	Small ribosomal subunit protein eS17A	6	2	7	6
sp|P06781|RHO2_YEAST	P06781	RHO2_YEAST	RHO2	192	Saccharomyces cerevisiae (strain ATCC 204508 / S288c)	GTP-binding protein RHO2	0	0	7	6
sp|P07149|FAS1_YEAST	P07149	FAS1_YEAST	FAS1	2051	Saccharomyces cerevisiae (strain ATCC 204508 / S288c)	Fatty acid synthase subunit beta	0	0	7	8
sp|P07259|PYR1_YEAST	P07259	PYR1_YEAST	URA2	2214	Saccharomyces cerevisiae (strain ATCC 204508 / S288c)	Protein URA2	1	0	7	11
sp|P08466|NUC1_YEAST	P08466	NUC1_YEAST	NUC1	329	Saccharomyces cerevisiae (strain ATCC 204508 / S288c)	Mitochondrial nuclease	0	0	7	14
sp|P08539|GPA1_YEAST	P08539	GPA1_YEAST	GPA1	472	Saccharomyces cerevisiae (strain ATCC 204508 / S288c)	Guanine nucleotide-binding protein alpha-1 subunit	0	0	7	7
sp|P0CX29|RS23A_YEAST	P0CX29	RS23A_YEAST	RPS23A	145	Saccharomyces cerevisiae (strain ATCC 204508 / S288c)	Small ribosomal subunit protein uS12A	7	3	7	6
sp|P12868|PEP5_YEAST	P12868	PEP5_YEAST	PEP5	1029	Saccharomyces cerevisiae (strain ATCC 204508 / S288c)	E3 ubiquitin-protein ligase PEP5	0	0	7	4
sp|P17898|CPT1_YEAST	P17898	CPT1_YEAST	CPT1	393	Saccharomyces cerevisiae (strain ATCC 204508 / S288c)	Cholinephosphotransferase 1	0	0	7	8
sp|P19516|COX11_YEAST	P19516	COX11_YEAST	COX11	300	Saccharomyces cerevisiae (strain ATCC 204508 / S288c)	Cytochrome c oxidase assembly protein COX11, mitochondrial	0	0	7	5
sp|P19955|RT31_YEAST	P19955	RT31_YEAST	YMR31	123	Saccharomyces cerevisiae (strain ATCC 204508 / S288c)	37S ribosomal protein YMR-31, mitochondrial	0	0	7	5
sp|P22147|XRN1_YEAST	P22147	XRN1_YEAST	XRN1	1528	Saccharomyces cerevisiae (strain ATCC 204508 / S288c)	5'-3' exoribonuclease 1	0	0	7	8
sp|P25294|SIS1_YEAST	P25294	SIS1_YEAST	SIS1	352	Saccharomyces cerevisiae (strain ATCC 204508 / S288c)	Protein SIS1	0	0	7	5
sp|P25343|RV161_YEAST	P25343	RV161_YEAST	RVS161	265	Saccharomyces cerevisiae (strain ATCC 204508 / S288c)	Reduced viability upon starvation protein 161	0	0	7	3
sp|P32074|COPG_YEAST	P32074	COPG_YEAST	SEC21	935	Saccharomyces cerevisiae (strain ATCC 204508 / S288c)	Coatomer subunit gamma	1	0	7	4
sp|P32500|NDC1_YEAST	P32500	NDC1_YEAST	NDC1	655	Saccharomyces cerevisiae (strain ATCC 204508 / S288c)	Nucleoporin NDC1	3	0	7	9
sp|P32839|BCS1_YEAST	P32839	BCS1_YEAST	BCS1	456	Saccharomyces cerevisiae (strain ATCC 204508 / S288c)	Mitochondrial chaperone BCS1	0	0	7	12
sp|P33328|SNC2_YEAST	P33328	SNC2_YEAST	SNC2	115	Saccharomyces cerevisiae (strain ATCC 204508 / S288c)	Synaptobrevin homolog 2	0	0	7	8
sp|P35844|KES1_YEAST	P35844	KES1_YEAST	KES1	434	Saccharomyces cerevisiae (strain ATCC 204508 / S288c)	Oxysterol-binding protein homolog 4	0	0	7	8
sp|P36034|COS9_YEAST	P36034	COS9_YEAST	COS9	407	Saccharomyces cerevisiae (strain ATCC 204508 / S288c)	Protein COS9	0	0	7	2
sp|P38146|YPT10_YEAST	P38146	YPT10_YEAST	YPT10	199	Saccharomyces cerevisiae (strain ATCC 204508 / S288c)	GTP-binding protein YPT10	0	0	7	2
sp|P38206|RFT1_YEAST	P38206	RFT1_YEAST	RFT1	574	Saccharomyces cerevisiae (strain ATCC 204508 / S288c)	Oligosaccharide translocation protein RFT1	0	0	7	6
sp|P38724|ARN2_YEAST	P38724	ARN2_YEAST	ARN2	620	Saccharomyces cerevisiae (strain ATCC 204508 / S288c)	Siderophore iron transporter ARN2	0	0	7	10
sp|P38869|SVP26_YEAST	P38869	SVP26_YEAST	SVP26	228	Saccharomyces cerevisiae (strain ATCC 204508 / S288c)	Protein SVP26	0	0	7	7
sp|P39727|ERV46_YEAST	P39727	ERV46_YEAST	ERV46	415	Saccharomyces cerevisiae (strain ATCC 204508 / S288c)	ER-derived vesicles protein ERV46	0	0	7	6
sp|P40074|AVT6_YEAST	P40074	AVT6_YEAST	AVT6	448	Saccharomyces cerevisiae (strain ATCC 204508 / S288c)	Vacuolar amino acid transporter 6	0	0	7	4
sp|P40581|GPX3_YEAST	P40581	GPX3_YEAST	HYR1	163	Saccharomyces cerevisiae (strain ATCC 204508 / S288c)	Glutathione peroxidase-like peroxiredoxin HYR1	0	0	7	5
sp|P40857|HACD_YEAST	P40857	HACD_YEAST	PHS1	217	Saccharomyces cerevisiae (strain ATCC 204508 / S288c)	Very-long-chain (3R)-3-hydroxyacyl-CoA dehydratase PHS1	0	0	7	5
sp|P40961|PHB1_YEAST	P40961	PHB1_YEAST	PHB1	287	Saccharomyces cerevisiae (strain ATCC 204508 / S288c)	Prohibitin-1	0	0	7	13
sp|P42951|LSB6_YEAST	P42951	LSB6_YEAST	LSB6	607	Saccharomyces cerevisiae (strain ATCC 204508 / S288c)	Phosphatidylinositol 4-kinase LSB6	0	0	7	4
sp|P48236|GPC1_YEAST	P48236	GPC1_YEAST	GPC1	432	Saccharomyces cerevisiae (strain ATCC 204508 / S288c)	Glycerophosphocholine acyltransferase 1	0	0	7	3
sp|P53248|PEX8_YEAST	P53248	PEX8_YEAST	PEX8	589	Saccharomyces cerevisiae (strain ATCC 204508 / S288c)	Peroxisomal biogenesis factor 8	0	0	7	9
sp|P53264|CLD1_YEAST	P53264	CLD1_YEAST	CLD1	445	Saccharomyces cerevisiae (strain ATCC 204508 / S288c)	Cardiolipin-specific deacylase 1, mitochondrial	0	0	7	5
sp|P53507|TOM7_YEAST	P53507	TOM7_YEAST	TOM7	60	Saccharomyces cerevisiae (strain ATCC 204508 / S288c)	Mitochondrial import receptor subunit TOM7	0	0	7	9
sp|Q02201|OSH6_YEAST	Q02201	OSH6_YEAST	OSH6	448	Saccharomyces cerevisiae (strain ATCC 204508 / S288c)	Oxysterol-binding protein homolog 6	0	0	7	3
sp|Q02457|TBF1_YEAST	Q02457	TBF1_YEAST	TBF1	562	Saccharomyces cerevisiae (strain ATCC 204508 / S288c)	Protein TBF1	0	0	7	4
sp|Q02969|PEX25_YEAST	Q02969	PEX25_YEAST	PEX25	394	Saccharomyces cerevisiae (strain ATCC 204508 / S288c)	Peroxisomal membrane protein PEX25	0	0	7	11
sp|Q04301|VBA1_YEAST	Q04301	VBA1_YEAST	VBA1	562	Saccharomyces cerevisiae (strain ATCC 204508 / S288c)	Vacuolar basic amino acid transporter 1	0	0	7	9
sp|Q05998|THI7_YEAST	Q05998	THI7_YEAST	THI7	598	Saccharomyces cerevisiae (strain ATCC 204508 / S288c)	Thiamine transporter	0	0	7	4
sp|Q06089|YP098_YEAST	Q06089	YP098_YEAST	YPR098C	161	Saccharomyces cerevisiae (strain ATCC 204508 / S288c)	Uncharacterized mitochondrial outer membrane protein YPR098C	0	0	7	8
sp|Q12125|GET4_YEAST	Q12125	GET4_YEAST	GET4	312	Saccharomyces cerevisiae (strain ATCC 204508 / S288c)	Golgi to ER traffic protein 4	0	0	7	7
sp|Q12251|YP011_YEAST	Q12251	YP011_YEAST	YPR011C	326	Saccharomyces cerevisiae (strain ATCC 204508 / S288c)	Uncharacterized mitochondrial carrier YPR011C	0	0	7	13
sp|Q12301|YD180_YEAST	Q12301	YD180_YEAST	YDL180W	547	Saccharomyces cerevisiae (strain ATCC 204508 / S288c)	Uncharacterized membrane protein YDL180W	0	0	7	12
sp|Q12359|ATO3_YEAST	Q12359	ATO3_YEAST	ATO3	275	Saccharomyces cerevisiae (strain ATCC 204508 / S288c)	Ammonia transport outward protein 3	1	0	7	4
sp|Q12460|NOP56_YEAST	Q12460	NOP56_YEAST	NOP56	504	Saccharomyces cerevisiae (strain ATCC 204508 / S288c)	Nucleolar protein 56	0	0	7	7
sp|A6ZQF6|ATG27_YEAS7	A6ZQF6	ATG27_YEAS7	ATG27	271	Saccharomyces cerevisiae (strain YJM789)	Autophagy-related protein 27	0	0	6	11
sp|A6ZQI5|SFH5_YEAS7	A6ZQI5	SFH5_YEAS7	SFH5	294	Saccharomyces cerevisiae (strain YJM789)	Phosphatidylinositol transfer protein SFH5	0	0	6	5
sp|A6ZZS6|PTM1_YEAS7	A6ZZS6	PTM1_YEAS7	PTM1	523	Saccharomyces cerevisiae (strain YJM789)	Membrane protein PTM1	0	0	6	5
sp|A7A0X4|EFGM_YEAS7	A7A0X4	EFGM_YEAS7	MEF1	761	Saccharomyces cerevisiae (strain YJM789)	Elongation factor G, mitochondrial	0	0	6	10
sp|P00729|CBPY_YEAST	P00729	CBPY_YEAST	PRC1	532	Saccharomyces cerevisiae (strain ATCC 204508 / S288c)	Carboxypeptidase Y	0	0	6	2
sp|P04039|COX8_YEAST	P04039	COX8_YEAST	COX8	78	Saccharomyces cerevisiae (strain ATCC 204508 / S288c)	Cytochrome c oxidase subunit 8, mitochondrial	1	1	6	2
sp|P04911|H2A1_YEAST	P04911	H2A1_YEAST	HTA1	132	Saccharomyces cerevisiae (strain ATCC 204508 / S288c)	Histone H2A.1	3	1	6	3
sp|P0C0W9|RL11A_YEAST	P0C0W9	RL11A_YEAST	RPL11A	174	Saccharomyces cerevisiae (strain ATCC 204508 / S288c)	Large ribosomal subunit protein uL5A	0	0	6	7
sp|P10963|PCKA_YEAST	P10963	PCKA_YEAST	PCK1	549	Saccharomyces cerevisiae (strain ATCC 204508 / S288c)	Phosphoenolpyruvate carboxykinase (ATP)	0	0	6	6
sp|P12686|RT13_YEAST	P12686	RT13_YEAST	MRP13	339	Saccharomyces cerevisiae (strain ATCC 204508 / S288c)	Small ribosomal subunit protein mS44	0	0	6	7
sp|P18496|ATP10_YEAST	P18496	ATP10_YEAST	ATP10	279	Saccharomyces cerevisiae (strain ATCC 204508 / S288c)	Mitochondrial ATPase complex subunit ATP10	0	0	6	9
sp|P19073|CDC42_YEAST	P19073	CDC42_YEAST	CDC42	191	Saccharomyces cerevisiae (strain ATCC 204508 / S288c)	Cell division control protein 42	0	0	6	7
sp|P19097|FAS2_YEAST	P19097	FAS2_YEAST	FAS2	1887	Saccharomyces cerevisiae (strain ATCC 204508 / S288c)	Fatty acid synthase subunit alpha	0	0	6	1
sp|P23180|AIM17_YEAST	P23180	AIM17_YEAST	AIM17	465	Saccharomyces cerevisiae (strain ATCC 204508 / S288c)	Probable oxidoreductase AIM17	0	0	6	8
sp|P23833|SCO1_YEAST	P23833	SCO1_YEAST	SCO1	295	Saccharomyces cerevisiae (strain ATCC 204508 / S288c)	Protein SCO1, mitochondrial	0	0	6	7
sp|P25365|SED4_YEAST	P25365	SED4_YEAST	SED4	1065	Saccharomyces cerevisiae (strain ATCC 204508 / S288c)	Putative guanine nucleotide-exchange factor SED4	0	0	6	6
sp|P25613|ADY2_YEAST	P25613	ADY2_YEAST	ADY2	283	Saccharomyces cerevisiae (strain ATCC 204508 / S288c)	Accumulation of dyads protein 2	0	0	6	9
sp|P27697|COQ8_YEAST	P27697	COQ8_YEAST	COQ8	501	Saccharomyces cerevisiae (strain ATCC 204508 / S288c)	Atypical kinase COQ8, mitochondrial	0	0	6	10
sp|P27801|PEP3_YEAST	P27801	PEP3_YEAST	PEP3	918	Saccharomyces cerevisiae (strain ATCC 204508 / S288c)	Vacuolar membrane protein PEP3	0	0	6	3
sp|P28817|HIBCH_YEAST	P28817	HIBCH_YEAST	EHD3	500	Saccharomyces cerevisiae (strain ATCC 204508 / S288c)	Small ribosomal subunit protein mS47	0	0	6	3
sp|P32485|HOG1_YEAST	P32485	HOG1_YEAST	HOG1	435	Saccharomyces cerevisiae (strain ATCC 204508 / S288c)	Mitogen-activated protein kinase HOG1	0	0	6	2
sp|P32784|GPT1_YEAST	P32784	GPT1_YEAST	SCT1	759	Saccharomyces cerevisiae (strain ATCC 204508 / S288c)	Glycerol-3-phosphate O-acyltransferase 1	0	0	6	11
sp|P35180|TOM20_YEAST	P35180	TOM20_YEAST	TOM20	183	Saccharomyces cerevisiae (strain ATCC 204508 / S288c)	Mitochondrial import receptor subunit TOM20	0	0	6	5
sp|P36141|FMP46_YEAST	P36141	FMP46_YEAST	FMP46	133	Saccharomyces cerevisiae (strain ATCC 204508 / S288c)	Putative redox protein FMP46, mitochondrial	0	0	6	5
sp|P36172|VBA5_YEAST	P36172	VBA5_YEAST	VBA5	582	Saccharomyces cerevisiae (strain ATCC 204508 / S288c)	Vacuolar basic amino acid transporter 5	0	0	6	7
sp|P36523|RM15_YEAST	P36523	RM15_YEAST	MRPL15	253	Saccharomyces cerevisiae (strain ATCC 204508 / S288c)	Large ribosomal subunit protein mL57	0	0	6	3
sp|P38234|RFS1_YEAST	P38234	RFS1_YEAST	RFS1	210	Saccharomyces cerevisiae (strain ATCC 204508 / S288c)	Protein RFS1	1	0	6	11
sp|P38312|ERV15_YEAST	P38312	ERV15_YEAST	ERV15	142	Saccharomyces cerevisiae (strain ATCC 204508 / S288c)	ER-derived vesicles protein ERV15	0	0	6	8
sp|P38812|GEP4_YEAST	P38812	GEP4_YEAST	GEP4	185	Saccharomyces cerevisiae (strain ATCC 204508 / S288c)	Phosphatidylglycerophosphatase GEP4, mitochondrial	0	0	6	8
sp|P38966|VTC5_YEAST	P38966	VTC5_YEAST	VTC5	869	Saccharomyces cerevisiae (strain ATCC 204508 / S288c)	Vacuole transporter chaperone complex subunit 5	0	0	6	9
sp|P39010|AKR1_YEAST	P39010	AKR1_YEAST	AKR1	764	Saccharomyces cerevisiae (strain ATCC 204508 / S288c)	Palmitoyltransferase AKR1	0	0	6	7
sp|P40015|ISC1_YEAST	P40015	ISC1_YEAST	ISC1	477	Saccharomyces cerevisiae (strain ATCC 204508 / S288c)	Inositol phosphosphingolipids phospholipase C	0	0	6	5
sp|P40066|GLE2_YEAST	P40066	GLE2_YEAST	GLE2	365	Saccharomyces cerevisiae (strain ATCC 204508 / S288c)	mRNA export factor GLE2	0	0	6	14
sp|P40368|NUP82_YEAST	P40368	NUP82_YEAST	NUP82	713	Saccharomyces cerevisiae (strain ATCC 204508 / S288c)	Nucleoporin NUP82	0	0	6	7
sp|P46972|IMP2_YEAST	P46972	IMP2_YEAST	IMP2	177	Saccharomyces cerevisiae (strain ATCC 204508 / S288c)	Mitochondrial inner membrane protease subunit 2	0	0	6	2
sp|P47088|GPI14_YEAST	P47088	GPI14_YEAST	GPI14	403	Saccharomyces cerevisiae (strain ATCC 204508 / S288c)	GPI mannosyltransferase 1	0	0	6	6
sp|P48589|RS12_YEAST	P48589	RS12_YEAST	RPS12	143	Saccharomyces cerevisiae (strain ATCC 204508 / S288c)	Small ribosomal subunit protein eS12	0	0	6	6
sp|P53045|ERG25_YEAST	P53045	ERG25_YEAST	ERG25	309	Saccharomyces cerevisiae (strain ATCC 204508 / S288c)	C-4 methylsterol oxidase ERG25	0	0	6	7
sp|P53121|FLC3_YEAST	P53121	FLC3_YEAST	FLC3	802	Saccharomyces cerevisiae (strain ATCC 204508 / S288c)	Putative flavin carrier protein 3	0	0	6	6
sp|P53241|VHT1_YEAST	P53241	VHT1_YEAST	VHT1	593	Saccharomyces cerevisiae (strain ATCC 204508 / S288c)	Vitamin H transporter	0	0	6	7
sp|P53633|PRA1_YEAST	P53633	PRA1_YEAST	YIP3	176	Saccharomyces cerevisiae (strain ATCC 204508 / S288c)	Prenylated Rab acceptor 1	0	0	6	2
sp|P54857|TGL2_YEAST	P54857	TGL2_YEAST	TGL2	326	Saccharomyces cerevisiae (strain ATCC 204508 / S288c)	Triacylglycerol lipase 2	0	0	6	13
sp|Q01217|ARG56_YEAST	Q01217	ARG56_YEAST	ARG5,6	863	Saccharomyces cerevisiae (strain ATCC 204508 / S288c)	Protein ARG5,6, mitochondrial	0	0	6	4
sp|Q01560|NOP3_YEAST	Q01560	NOP3_YEAST	NPL3	414	Saccharomyces cerevisiae (strain ATCC 204508 / S288c)	Serine/arginine (SR)-type shuttling mRNA binding protein NPL3	0	0	6	5
sp|Q02774|SHR3_YEAST	Q02774	SHR3_YEAST	SHR3	210	Saccharomyces cerevisiae (strain ATCC 204508 / S288c)	Secretory component protein SHR3	0	0	6	5
sp|Q02889|MGR2_YEAST	Q02889	MGR2_YEAST	MGR2	113	Saccharomyces cerevisiae (strain ATCC 204508 / S288c)	Protein MGR2	0	0	6	6
sp|Q03778|RIFK_YEAST	Q03778	RIFK_YEAST	FMN1	218	Saccharomyces cerevisiae (strain ATCC 204508 / S288c)	Riboflavin kinase	0	0	6	10
sp|Q03790|NUP53_YEAST	Q03790	NUP53_YEAST	NUP53	475	Saccharomyces cerevisiae (strain ATCC 204508 / S288c)	Nucleoporin NUP53	0	0	6	11
sp|Q04491|SEC13_YEAST	Q04491	SEC13_YEAST	SEC13	297	Saccharomyces cerevisiae (strain ATCC 204508 / S288c)	Protein transport protein SEC13	0	0	6	10
sp|Q05521|DPP1_YEAST	Q05521	DPP1_YEAST	DPP1	289	Saccharomyces cerevisiae (strain ATCC 204508 / S288c)	Diacylglycerol pyrophosphate phosphatase 1	0	0	6	4
sp|Q05867|YL283_YEAST	Q05867	YL283_YEAST	YLR283W	314	Saccharomyces cerevisiae (strain ATCC 204508 / S288c)	Uncharacterized protein YLR283W, mitochondrial	0	0	6	9
sp|Q06538|CSC1_YEAST	Q06538	CSC1_YEAST	CSC1	782	Saccharomyces cerevisiae (strain ATCC 204508 / S288c)	Calcium permeable stress-gated cation channel 1	0	0	6	5
sp|Q06678|RM35_YEAST	Q06678	RM35_YEAST	MRPL35	367	Saccharomyces cerevisiae (strain ATCC 204508 / S288c)	Large ribosomal subunit protein mL38	0	0	6	3
sp|Q08299|ENB1_YEAST	Q08299	ENB1_YEAST	ENB1	606	Saccharomyces cerevisiae (strain ATCC 204508 / S288c)	Siderophore iron transporter ENB1	0	0	6	12
sp|Q12001|ALG6_YEAST	Q12001	ALG6_YEAST	ALG6	544	Saccharomyces cerevisiae (strain ATCC 204508 / S288c)	Dolichyl pyrophosphate Man9GlcNAc2 alpha-1,3-glucosyltransferase	0	0	6	6
sp|Q12063|UPPS_YEAST	Q12063	UPPS_YEAST	NUS1	375	Saccharomyces cerevisiae (strain ATCC 204508 / S288c)	Dehydrodolichyl diphosphate synthase complex subunit NUS1	3	0	6	5
sp|Q12106|MCP1_YEAST	Q12106	MCP1_YEAST	MCP1	302	Saccharomyces cerevisiae (strain ATCC 204508 / S288c)	Mitochondrial adapter protein MCP1	0	0	6	4
sp|Q12283|FABD_YEAST	Q12283	FABD_YEAST	MCT1	360	Saccharomyces cerevisiae (strain ATCC 204508 / S288c)	Malonyl CoA-acyl carrier protein transacylase, mitochondrial	0	0	6	4
sp|Q12305|RDL1_YEAST	Q12305	RDL1_YEAST	RDL1	139	Saccharomyces cerevisiae (strain ATCC 204508 / S288c)	Thiosulfate:glutathione sulfurtransferase	0	0	6	8
sp|Q12375|ORT1_YEAST	Q12375	ORT1_YEAST	ORT1	292	Saccharomyces cerevisiae (strain ATCC 204508 / S288c)	Mitochondrial ornithine transporter 1	0	0	6	6
sp|Q12403|ERP3_YEAST	Q12403	ERP3_YEAST	ERP3	225	Saccharomyces cerevisiae (strain ATCC 204508 / S288c)	Protein ERP3	0	0	6	2
sp|Q12412|PNS1_YEAST	Q12412	PNS1_YEAST	PNS1	539	Saccharomyces cerevisiae (strain ATCC 204508 / S288c)	Protein PNS1	0	0	6	2
sp|Q12743|DFM1_YEAST	Q12743	DFM1_YEAST	DFM1	341	Saccharomyces cerevisiae (strain ATCC 204508 / S288c)	DER1-like family member protein 1	0	0	6	9
sp|Q12745|SEC39_YEAST	Q12745	SEC39_YEAST	SEC39	709	Saccharomyces cerevisiae (strain ATCC 204508 / S288c)	Protein transport protein SEC39	0	0	6	7
sp|Q8TGJ3|KISH_YEAST	Q8TGJ3	KISH_YEAST	KSH1	72	Saccharomyces cerevisiae (strain ATCC 204508 / S288c)	Protein Kish	0	0	6	5
sp|A6ZVD0|ATG32_YEAS7	A6ZVD0	ATG32_YEAS7	ATG32	529	Saccharomyces cerevisiae (strain YJM789)	Autophagy-related protein 32	0	0	5	5
sp|A7A285|YFL5_YEAS7	A7A285	YFL5_YEAS7	SCY_1795	309	Saccharomyces cerevisiae (strain YJM789)	Uncharacterized mitochondrial carrier SCY_1795	0	0	5	6
sp|P00331|ADH2_YEAST	P00331	ADH2_YEAST	ADH2	348	Saccharomyces cerevisiae (strain ATCC 204508 / S288c)	Alcohol dehydrogenase 2	1	0	5	6
sp|P00546|CDK1_YEAST	P00546	CDK1_YEAST	CDC28	298	Saccharomyces cerevisiae (strain ATCC 204508 / S288c)	Cyclin-dependent kinase 1	0	0	5	5
sp|P02829|HSP82_YEAST	P02829	HSP82_YEAST	HSP82	709	Saccharomyces cerevisiae (strain ATCC 204508 / S288c)	ATP-dependent molecular chaperone HSP82	0	0	5	12
sp|P03871|REP1_YEAST	P03871	REP1_YEAST	REP1	373	Saccharomyces cerevisiae (strain ATCC 204508 / S288c)	Partitioning protein REP1	0	0	5	6
sp|P04449|RL24A_YEAST	P04449	RL24A_YEAST	RPL24A	155	Saccharomyces cerevisiae (strain ATCC 204508 / S288c)	Large ribosomal subunit protein eL24A	8	2	5	5
sp|P04456|RL25_YEAST	P04456	RL25_YEAST	RPL25	142	Saccharomyces cerevisiae (strain ATCC 204508 / S288c)	Large ribosomal subunit protein uL23	0	0	5	3
sp|P07263|SYH_YEAST	P07263	SYH_YEAST	HTS1	546	Saccharomyces cerevisiae (strain ATCC 204508 / S288c)	Histidine--tRNA ligase, mitochondrial	0	0	5	5
sp|P09950|HEM1_YEAST	P09950	HEM1_YEAST	HEM1	548	Saccharomyces cerevisiae (strain ATCC 204508 / S288c)	5-aminolevulinate synthase, mitochondrial	0	0	5	4
sp|P0CX25|RL43A_YEAST	P0CX25	RL43A_YEAST	RPL43A	92	Saccharomyces cerevisiae (strain ATCC 204508 / S288c)	Large ribosomal subunit protein eL43A	5	5	5	4
sp|P0CX45|RL2A_YEAST	P0CX45	RL2A_YEAST	RPL2A	254	Saccharomyces cerevisiae (strain ATCC 204508 / S288c)	Large ribosomal subunit protein uL2A	1	1	5	9
sp|P10174|COX7_YEAST	P10174	COX7_YEAST	COX7	60	Saccharomyces cerevisiae (strain ATCC 204508 / S288c)	Cytochrome c oxidase subunit 7, mitochondrial	0	0	5	4
sp|P10566|MRS3_YEAST	P10566	MRS3_YEAST	MRS3	314	Saccharomyces cerevisiae (strain ATCC 204508 / S288c)	Mitochondrial RNA-splicing protein MRS3	0	0	5	6
sp|P11655|SEC12_YEAST	P11655	SEC12_YEAST	SEC12	471	Saccharomyces cerevisiae (strain ATCC 204508 / S288c)	Guanine nucleotide-exchange factor SEC12	0	0	5	6
sp|P12687|RM02_YEAST	P12687	RM02_YEAST	MRP7	371	Saccharomyces cerevisiae (strain ATCC 204508 / S288c)	Large ribosomal subunit protein bL27m	0	0	5	3
sp|P13711|ACOX_YEAST	P13711	ACOX_YEAST	POX1	748	Saccharomyces cerevisiae (strain ATCC 204508 / S288c)	Acyl-coenzyme A oxidase	0	0	5	5
sp|P17695|GLRX2_YEAST	P17695	GLRX2_YEAST	GRX2	143	Saccharomyces cerevisiae (strain ATCC 204508 / S288c)	Glutaredoxin-2	0	0	5	4
sp|P22353|RM08_YEAST	P22353	RM08_YEAST	MRPL8	238	Saccharomyces cerevisiae (strain ATCC 204508 / S288c)	Large ribosomal subunit protein bL17m	0	0	5	2
sp|P23291|KC11_YEAST	P23291	KC11_YEAST	YCK1	538	Saccharomyces cerevisiae (strain ATCC 204508 / S288c)	Casein kinase I homolog 1	1	0	5	10
sp|P25348|RM32_YEAST	P25348	RM32_YEAST	MRPL32	183	Saccharomyces cerevisiae (strain ATCC 204508 / S288c)	Large ribosomal subunit protein bL32m	0	0	5	2
sp|P25379|STDH_YEAST	P25379	STDH_YEAST	CHA1	360	Saccharomyces cerevisiae (strain ATCC 204508 / S288c)	Catabolic L-serine/threonine dehydratase	1	0	5	11
sp|P25491|MAS5_YEAST	P25491	MAS5_YEAST	YDJ1	409	Saccharomyces cerevisiae (strain ATCC 204508 / S288c)	Mitochondrial protein import protein MAS5	0	0	5	5
sp|P25719|CYPC_YEAST	P25719	CYPC_YEAST	CPR3	182	Saccharomyces cerevisiae (strain ATCC 204508 / S288c)	Peptidyl-prolyl cis-trans isomerase C, mitochondrial	0	0	5	7
sp|P26786|RS7A_YEAST	P26786	RS7A_YEAST	RPS7A	190	Saccharomyces cerevisiae (strain ATCC 204508 / S288c)	Small ribosomal subunit protein eS7A	0	0	5	9
sp|P27809|KRE2_YEAST	P27809	KRE2_YEAST	KRE2	442	Saccharomyces cerevisiae (strain ATCC 204508 / S288c)	Glycolipid 2-alpha-mannosyltransferase	0	0	5	4
sp|P28627|IMP1_YEAST	P28627	IMP1_YEAST	IMP1	190	Saccharomyces cerevisiae (strain ATCC 204508 / S288c)	Mitochondrial inner membrane protease subunit 1	0	0	5	6
sp|P31381|FUN26_YEAST	P31381	FUN26_YEAST	FUN26	517	Saccharomyces cerevisiae (strain ATCC 204508 / S288c)	Nucleoside transporter FUN26	0	0	5	5
sp|P32352|ERG2_YEAST	P32352	ERG2_YEAST	ERG2	222	Saccharomyces cerevisiae (strain ATCC 204508 / S288c)	C-8 sterol isomerase ERG2	0	0	5	6
sp|P32527|ZUO1_YEAST	P32527	ZUO1_YEAST	ZUO1	433	Saccharomyces cerevisiae (strain ATCC 204508 / S288c)	Zuotin	0	0	5	6
sp|P32836|GSP2_YEAST	P32836	GSP2_YEAST	GSP2	220	Saccharomyces cerevisiae (strain ATCC 204508 / S288c)	GTP-binding nuclear protein GSP2/CNR2	0	0	5	6
sp|P33338|SLA2_YEAST	P33338	SLA2_YEAST	SLA2	968	Saccharomyces cerevisiae (strain ATCC 204508 / S288c)	Protein SLA2	0	0	5	3
sp|P35176|CYPD_YEAST	P35176	CYPD_YEAST	CPR5	225	Saccharomyces cerevisiae (strain ATCC 204508 / S288c)	Peptidyl-prolyl cis-trans isomerase D	0	0	5	6
sp|P35179|SC61G_YEAST	P35179	SC61G_YEAST	SSS1	80	Saccharomyces cerevisiae (strain ATCC 204508 / S288c)	Protein transport protein SSS1	2	5	5	8
sp|P36018|YPT52_YEAST	P36018	YPT52_YEAST	YPT52	234	Saccharomyces cerevisiae (strain ATCC 204508 / S288c)	GTP-binding protein YPT52	0	0	5	8
sp|P36046|MIA40_YEAST	P36046	MIA40_YEAST	MIA40	403	Saccharomyces cerevisiae (strain ATCC 204508 / S288c)	Mitochondrial intermembrane space import and assembly protein 40	0	0	5	4
sp|P36521|RM11_YEAST	P36521	RM11_YEAST	MRPL11	249	Saccharomyces cerevisiae (strain ATCC 204508 / S288c)	Large ribosomal subunit protein uL10m	0	0	5	7
sp|P38196|FUI1_YEAST	P38196	FUI1_YEAST	FUI1	639	Saccharomyces cerevisiae (strain ATCC 204508 / S288c)	Uridine permease	0	0	5	4
sp|P38428|CUE1_YEAST	P38428	CUE1_YEAST	CUE1	203	Saccharomyces cerevisiae (strain ATCC 204508 / S288c)	Coupling of ubiquitin conjugation to ER degradation protein 1	0	0	5	9
sp|P38817|GGA2_YEAST	P38817	GGA2_YEAST	GGA2	585	Saccharomyces cerevisiae (strain ATCC 204508 / S288c)	ADP-ribosylation factor-binding protein GGA2	0	0	5	9
sp|P38992|SUR2_YEAST	P38992	SUR2_YEAST	SUR2	349	Saccharomyces cerevisiae (strain ATCC 204508 / S288c)	Sphingolipid C4-hydroxylase SUR2	0	0	5	4
sp|P38995|ATU2_YEAST	P38995	ATU2_YEAST	CCC2	1004	Saccharomyces cerevisiae (strain ATCC 204508 / S288c)	Copper-transporting ATPase	0	0	5	5
sp|P39078|TCPD_YEAST	P39078	TCPD_YEAST	CCT4	528	Saccharomyces cerevisiae (strain ATCC 204508 / S288c)	T-complex protein 1 subunit delta	0	0	5	2
sp|P39105|PLB1_YEAST	P39105	PLB1_YEAST	PLB1	664	Saccharomyces cerevisiae (strain ATCC 204508 / S288c)	Lysophospholipase 1	0	0	5	5
sp|P40046|VTC1_YEAST	P40046	VTC1_YEAST	VTC1	129	Saccharomyces cerevisiae (strain ATCC 204508 / S288c)	Vacuolar transporter chaperone complex subunit 1	0	0	5	5
sp|P40098|FMP10_YEAST	P40098	FMP10_YEAST	FMP10	244	Saccharomyces cerevisiae (strain ATCC 204508 / S288c)	Uncharacterized mitochondrial membrane protein FMP10	0	0	5	4
sp|P40165|NNRE_YEAST	P40165	NNRE_YEAST	NNR1	246	Saccharomyces cerevisiae (strain ATCC 204508 / S288c)	NAD(P)H-hydrate epimerase	0	0	5	2
sp|P40350|ALG5_YEAST	P40350	ALG5_YEAST	ALG5	334	Saccharomyces cerevisiae (strain ATCC 204508 / S288c)	Dolichyl-phosphate beta-glucosyltransferase	0	0	5	3
sp|P40364|MPM1_YEAST	P40364	MPM1_YEAST	MPM1	252	Saccharomyces cerevisiae (strain ATCC 204508 / S288c)	Mitochondrial peculiar membrane protein 1	0	0	5	7
sp|P40530|PDK1_YEAST	P40530	PDK1_YEAST	PKP1	394	Saccharomyces cerevisiae (strain ATCC 204508 / S288c)	[Pyruvate dehydrogenase (acetyl-transferring)] kinase 1, mitochondrial	0	0	5	2
sp|P40548|SNL1_YEAST	P40548	SNL1_YEAST	SNL1	159	Saccharomyces cerevisiae (strain ATCC 204508 / S288c)	HSP70 co-chaperone SNL1	0	0	5	6
sp|P41930|SSU1_YEAST	P41930	SSU1_YEAST	SSU1	458	Saccharomyces cerevisiae (strain ATCC 204508 / S288c)	Sulfite efflux pump SSU1	0	0	5	6
sp|P46681|DLD2_YEAST	P46681	DLD2_YEAST	DLD2	530	Saccharomyces cerevisiae (strain ATCC 204508 / S288c)	D-2-hydroxyglutarate--pyruvate transhydrogenase DLD2	0	0	5	5
sp|P47069|MPS3_YEAST	P47069	MPS3_YEAST	MPS3	682	Saccharomyces cerevisiae (strain ATCC 204508 / S288c)	Spindle pole body assembly component MPS3	0	0	5	2
sp|P47084|MRX12_YEAST	P47084	MRX12_YEAST	MRX12	519	Saccharomyces cerevisiae (strain ATCC 204508 / S288c)	MIOREX complex component 12	0	0	5	5
sp|P47190|PMT3_YEAST	P47190	PMT3_YEAST	PMT3	753	Saccharomyces cerevisiae (strain ATCC 204508 / S288c)	Dolichyl-phosphate-mannose--protein mannosyltransferase 3	0	0	5	5
sp|P53157|MPC1_YEAST	P53157	MPC1_YEAST	MPC1	130	Saccharomyces cerevisiae (strain ATCC 204508 / S288c)	Mitochondrial pyruvate carrier 1	0	0	5	8
sp|P53174|PRM8_YEAST	P53174	PRM8_YEAST	PRM8	237	Saccharomyces cerevisiae (strain ATCC 204508 / S288c)	Pheromone-regulated membrane protein 8	0	0	5	6
sp|P53203|PEX31_YEAST	P53203	PEX31_YEAST	PEX31	462	Saccharomyces cerevisiae (strain ATCC 204508 / S288c)	Peroxisomal membrane protein PEX31	0	0	5	6
sp|P53584|YTP1_YEAST	P53584	YTP1_YEAST	YTP1	459	Saccharomyces cerevisiae (strain ATCC 204508 / S288c)	Protein YTP1	0	0	5	4
sp|P53875|RM19_YEAST	P53875	RM19_YEAST	MRPL19	158	Saccharomyces cerevisiae (strain ATCC 204508 / S288c)	Large ribosomal subunit protein uL11m	0	0	5	6
sp|P53983|ASI3_YEAST	P53983	ASI3_YEAST	ASI3	676	Saccharomyces cerevisiae (strain ATCC 204508 / S288c)	Probable ERAD-associated E3 ubiquitin-protein ligase ASI1	0	0	5	3
sp|P56508|SNA2_YEAST	P56508	SNA2_YEAST	SNA2	79	Saccharomyces cerevisiae (strain ATCC 204508 / S288c)	Protein SNA2	1	1	5	5
sp|P87284|PMP3_YEAST	P87284	PMP3_YEAST	PMP3	55	Saccharomyces cerevisiae (strain ATCC 204508 / S288c)	Plasma membrane proteolipid 3	0	0	5	5
sp|Q00873|CYT2_YEAST	Q00873	CYT2_YEAST	CYT2	224	Saccharomyces cerevisiae (strain ATCC 204508 / S288c)	Holocytochrome-c1 synthase	0	0	5	4
sp|Q01477|UBP3_YEAST	Q01477	UBP3_YEAST	UBP3	912	Saccharomyces cerevisiae (strain ATCC 204508 / S288c)	Ubiquitin carboxyl-terminal hydrolase 3	0	0	5	3
sp|Q02821|IMA1_YEAST	Q02821	IMA1_YEAST	SRP1	542	Saccharomyces cerevisiae (strain ATCC 204508 / S288c)	Importin subunit alpha	2	0	5	1
sp|Q03714|USA1_YEAST	Q03714	USA1_YEAST	USA1	838	Saccharomyces cerevisiae (strain ATCC 204508 / S288c)	U1 SNP1-associating protein 1	0	0	5	8
sp|Q03823|YM35_YEAST	Q03823	YM35_YEAST	YMR160W	816	Saccharomyces cerevisiae (strain ATCC 204508 / S288c)	Uncharacterized protein YMR160W	0	0	5	5
sp|Q03973|HMO1_YEAST	Q03973	HMO1_YEAST	HMO1	246	Saccharomyces cerevisiae (strain ATCC 204508 / S288c)	High mobility group protein 1	0	0	5	9
sp|Q06159|ATG39_YEAST	Q06159	ATG39_YEAST	ATG39	398	Saccharomyces cerevisiae (strain ATCC 204508 / S288c)	Autophagy-related protein 39	0	0	5	8
sp|Q06708|VAC14_YEAST	Q06708	VAC14_YEAST	VAC14	880	Saccharomyces cerevisiae (strain ATCC 204508 / S288c)	Vacuole morphology and inheritance protein 14	0	0	5	7
sp|Q07824|TPO1_YEAST	Q07824	TPO1_YEAST	TPO1	586	Saccharomyces cerevisiae (strain ATCC 204508 / S288c)	Polyamine transporter 1	0	0	5	5
sp|Q12209|FRE8_YEAST	Q12209	FRE8_YEAST	FRE8	686	Saccharomyces cerevisiae (strain ATCC 204508 / S288c)	Probable ferric reductase transmembrane component 8	0	0	5	4
sp|Q12229|UBX3_YEAST	Q12229	UBX3_YEAST	UBX3	455	Saccharomyces cerevisiae (strain ATCC 204508 / S288c)	UBX domain-containing protein 3	1	0	5	7
sp|Q12445|POM34_YEAST	Q12445	POM34_YEAST	POM34	299	Saccharomyces cerevisiae (strain ATCC 204508 / S288c)	Nucleoporin POM34	1	0	5	5
sp|Q12473|FRE6_YEAST	Q12473	FRE6_YEAST	FRE6	712	Saccharomyces cerevisiae (strain ATCC 204508 / S288c)	Ferric reductase transmembrane component 6	0	0	5	8
sp|Q92316|OST5_YEAST	Q92316	OST5_YEAST	OST5	86	Saccharomyces cerevisiae (strain ATCC 204508 / S288c)	Dolichyl-diphosphooligosaccharide--protein glycosyltransferase subunit OST5	0	0	5	6
sp|Q99316|MPD2_YEAST	Q99316	MPD2_YEAST	MPD2	277	Saccharomyces cerevisiae (strain ATCC 204508 / S288c)	Protein disulfide isomerase MPD2	0	0	5	8
sp|A6ZKT1|VPS10_YEAS7	A6ZKT1	VPS10_YEAS7	PEP1	1579	Saccharomyces cerevisiae (strain YJM789)	Vacuolar protein sorting/targeting protein PEP1	0	0	4	2
sp|A6ZQE9|MNN5_YEAS7	A6ZQE9	MNN5_YEAS7	MNN5	586	Saccharomyces cerevisiae (strain YJM789)	Alpha-1,2-mannosyltransferase MNN5	0	0	4	9
sp|A6ZUC0|SDS23_YEAS7	A6ZUC0	SDS23_YEAS7	SDS23	527	Saccharomyces cerevisiae (strain YJM789)	Protein SDS23	2	0	4	4
sp|A6ZW78|GPI3_YEAS7	A6ZW78	GPI3_YEAS7	SPT14	452	Saccharomyces cerevisiae (strain YJM789)	Phosphatidylinositol N-acetylglucosaminyltransferase GPI3 subunit	0	0	4	4
sp|A6ZY89|ARO1_YEAS7	A6ZY89	ARO1_YEAS7	ARO1	1588	Saccharomyces cerevisiae (strain YJM789)	Pentafunctional AROM polypeptide	0	0	4	1
sp|A6ZZZ8|CAF4_YEAS7	A6ZZZ8	CAF4_YEAS7	CAF4	645	Saccharomyces cerevisiae (strain YJM789)	CCR4-associated factor 4	0	0	4	3
sp|A7A082|EMC3_YEAS7	A7A082	EMC3_YEAS7	AIM27	253	Saccharomyces cerevisiae (strain YJM789)	ER membrane protein complex subunit 3	0	0	4	3
sp|P00924|ENO1_YEAST	P00924	ENO1_YEAST	ENO1	437	Saccharomyces cerevisiae (strain ATCC 204508 / S288c)	Enolase 1	0	0	4	4
sp|P07245|C1TC_YEAST	P07245	C1TC_YEAST	ADE3	946	Saccharomyces cerevisiae (strain ATCC 204508 / S288c)	C-1-tetrahydrofolate synthase, cytoplasmic	0	0	4	4
sp|P07278|KAPR_YEAST	P07278	KAPR_YEAST	BCY1	416	Saccharomyces cerevisiae (strain ATCC 204508 / S288c)	cAMP-dependent protein kinase regulatory subunit	0	0	4	2
sp|P0C2H6|RL27A_YEAST	P0C2H6	RL27A_YEAST	RPL27A	136	Saccharomyces cerevisiae (strain ATCC 204508 / S288c)	Large ribosomal subunit protein eL27A	0	0	4	5
sp|P0CX49|RL18A_YEAST	P0CX49	RL18A_YEAST	RPL18A	186	Saccharomyces cerevisiae (strain ATCC 204508 / S288c)	Large ribosomal subunit protein eL18A	2	3	4	4
sp|P10622|RLA3_YEAST	P10622	RLA3_YEAST	RPP1B	106	Saccharomyces cerevisiae (strain ATCC 204508 / S288c)	Large ribosomal subunit protein P1B	0	0	4	3
sp|P13856|RSR1_YEAST	P13856	RSR1_YEAST	RSR1	272	Saccharomyces cerevisiae (strain ATCC 204508 / S288c)	Ras-related protein RSR1	0	0	4	5
sp|P15891|ABP1_YEAST	P15891	ABP1_YEAST	ABP1	592	Saccharomyces cerevisiae (strain ATCC 204508 / S288c)	Actin-binding protein	0	0	4	1
sp|P17064|FCY2_YEAST	P17064	FCY2_YEAST	FCY2	533	Saccharomyces cerevisiae (strain ATCC 204508 / S288c)	Purine-cytosine permease FCY2	0	0	4	5
sp|P17076|RL8A_YEAST	P17076	RL8A_YEAST	RPL8A	256	Saccharomyces cerevisiae (strain ATCC 204508 / S288c)	Large ribosomal subunit protein eL8A	2	0	4	4
sp|P19146|ARF2_YEAST	P19146	ARF2_YEAST	ARF2	181	Saccharomyces cerevisiae (strain ATCC 204508 / S288c)	ADP-ribosylation factor 2	0	0	4	3
sp|P20424|SRP54_YEAST	P20424	SRP54_YEAST	SRP54	541	Saccharomyces cerevisiae (strain ATCC 204508 / S288c)	Signal recognition particle subunit SRP54	0	0	4	2
sp|P21592|COX10_YEAST	P21592	COX10_YEAST	COX10	462	Saccharomyces cerevisiae (strain ATCC 204508 / S288c)	Protoheme IX farnesyltransferase, mitochondrial	0	0	4	5
sp|P21827|RCC1_YEAST	P21827	RCC1_YEAST	SRM1	482	Saccharomyces cerevisiae (strain ATCC 204508 / S288c)	Guanine nucleotide exchange factor SRM1	0	0	4	6
sp|P22140|EPT1_YEAST	P22140	EPT1_YEAST	EPT1	391	Saccharomyces cerevisiae (strain ATCC 204508 / S288c)	Choline/ethanolaminephosphotransferase 1	0	0	4	4
sp|P22217|TRX1_YEAST	P22217	TRX1_YEAST	TRX1	103	Saccharomyces cerevisiae (strain ATCC 204508 / S288c)	Thioredoxin-1	0	0	4	6
sp|P23585|HXT2_YEAST	P23585	HXT2_YEAST	HXT2	541	Saccharomyces cerevisiae (strain ATCC 204508 / S288c)	High-affinity glucose transporter HXT2	0	0	4	10
sp|P23968|VATO_YEAST	P23968	VATO_YEAST	VMA16	213	Saccharomyces cerevisiae (strain ATCC 204508 / S288c)	V-type proton ATPase subunit c''	0	0	4	4
sp|P25580|PBN1_YEAST	P25580	PBN1_YEAST	PBN1	416	Saccharomyces cerevisiae (strain ATCC 204508 / S288c)	Protein PBN1	0	0	4	3
sp|P25655|NOT1_YEAST	P25655	NOT1_YEAST	CDC39	2108	Saccharomyces cerevisiae (strain ATCC 204508 / S288c)	General negative regulator of transcription subunit 1	0	0	4	4
sp|P29311|BMH1_YEAST	P29311	BMH1_YEAST	BMH1	267	Saccharomyces cerevisiae (strain ATCC 204508 / S288c)	Protein BMH1	0	0	4	0
sp|P31384|CCR4_YEAST	P31384	CCR4_YEAST	CCR4	837	Saccharomyces cerevisiae (strain ATCC 204508 / S288c)	CCR4-Not complex 3'-5'-exoribonuclease subunit Ccr4	0	0	4	2
sp|P32356|TREA_YEAST	P32356	TREA_YEAST	NTH1	751	Saccharomyces cerevisiae (strain ATCC 204508 / S288c)	Cytosolic neutral trehalase	0	0	4	4
sp|P32860|NFU1_YEAST	P32860	NFU1_YEAST	NFU1	256	Saccharomyces cerevisiae (strain ATCC 204508 / S288c)	NifU-like protein, mitochondrial	0	0	4	3
sp|P32898|PREP_YEAST	P32898	PREP_YEAST	CYM1	989	Saccharomyces cerevisiae (strain ATCC 204508 / S288c)	Presequence protease, mitochondrial	0	0	4	6
sp|P32904|RM06_YEAST	P32904	RM06_YEAST	MRPL6	214	Saccharomyces cerevisiae (strain ATCC 204508 / S288c)	Large ribosomal subunit protein uL6m	0	0	4	5
sp|P33302|PDR5_YEAST	P33302	PDR5_YEAST	PDR5	1511	Saccharomyces cerevisiae (strain ATCC 204508 / S288c)	Pleiotropic ABC efflux transporter of multiple drugs	0	0	4	9
sp|P33310|MDL1_YEAST	P33310	MDL1_YEAST	MDL1	695	Saccharomyces cerevisiae (strain ATCC 204508 / S288c)	ATP-dependent permease MDL1, mitochondrial	0	0	4	10
sp|P34163|TGL1_YEAST	P34163	TGL1_YEAST	TGL1	548	Saccharomyces cerevisiae (strain ATCC 204508 / S288c)	Sterol esterase TGL1	0	0	4	1
sp|P34240|ZRT3_YEAST	P34240	ZRT3_YEAST	ZRT3	503	Saccharomyces cerevisiae (strain ATCC 204508 / S288c)	Zinc-regulated transporter 3	0	0	4	4
sp|P35206|CSG2_YEAST	P35206	CSG2_YEAST	CSG2	410	Saccharomyces cerevisiae (strain ATCC 204508 / S288c)	Mannosyl phosphorylinositol ceramide synthase regulatory protein CSG2	0	0	4	8
sp|P36090|ANR2_YEAST	P36090	ANR2_YEAST	ANR2	516	Saccharomyces cerevisiae (strain ATCC 204508 / S288c)	Uncharacterized protein ANR2	0	0	4	4
sp|P36516|RM03_YEAST	P36516	RM03_YEAST	MRPL3	390	Saccharomyces cerevisiae (strain ATCC 204508 / S288c)	Large ribosomal subunit protein mL44	0	0	4	5
sp|P36534|RM40_YEAST	P36534	RM40_YEAST	MRPL40	297	Saccharomyces cerevisiae (strain ATCC 204508 / S288c)	Large ribosomal subunit protein uL24m	0	0	4	4
sp|P38069|MNN2_YEAST	P38069	MNN2_YEAST	MNN2	597	Saccharomyces cerevisiae (strain ATCC 204508 / S288c)	Alpha-1,2-mannosyltransferase MNN2	0	0	4	4
sp|P38072|SCO2_YEAST	P38072	SCO2_YEAST	SCO2	301	Saccharomyces cerevisiae (strain ATCC 204508 / S288c)	Protein SCO2, mitochondrial	0	0	4	3
sp|P38087|YMC2_YEAST	P38087	YMC2_YEAST	YMC2	329	Saccharomyces cerevisiae (strain ATCC 204508 / S288c)	Carrier protein YMC2, mitochondrial	0	0	4	5
sp|P38139|LDH1_YEAST	P38139	LDH1_YEAST	LDH1	375	Saccharomyces cerevisiae (strain ATCC 204508 / S288c)	Lipid droplet hydrolase 1	0	0	4	8
sp|P38217|IMB2_YEAST	P38217	IMB2_YEAST	KAP104	918	Saccharomyces cerevisiae (strain ATCC 204508 / S288c)	Importin subunit beta-2	0	0	4	7
sp|P38256|YBU6_YEAST	P38256	YBU6_YEAST	YBR096W	230	Saccharomyces cerevisiae (strain ATCC 204508 / S288c)	Probable thioesterase YBR096W	0	0	4	7
sp|P38329|VHC1_YEAST	P38329	VHC1_YEAST	VHC1	1120	Saccharomyces cerevisiae (strain ATCC 204508 / S288c)	Vacuolar cation-chloride cotransporter 1	0	0	4	8
sp|P38431|IF5_YEAST	P38431	IF5_YEAST	TIF5	405	Saccharomyces cerevisiae (strain ATCC 204508 / S288c)	Eukaryotic translation initiation factor 5	0	0	4	3
sp|P38689|KPR3_YEAST	P38689	KPR3_YEAST	PRS3	320	Saccharomyces cerevisiae (strain ATCC 204508 / S288c)	Ribose-phosphate pyrophosphokinase 3	0	0	4	2
sp|P38736|GOSR1_YEAST	P38736	GOSR1_YEAST	GOS1	223	Saccharomyces cerevisiae (strain ATCC 204508 / S288c)	Golgi SNAP receptor complex member 1	0	0	4	4
sp|P38875|GPI16_YEAST	P38875	GPI16_YEAST	GPI16	610	Saccharomyces cerevisiae (strain ATCC 204508 / S288c)	GPI transamidase component GPI16	0	0	4	5
sp|P38909|CYC2_YEAST	P38909	CYC2_YEAST	CYC2	366	Saccharomyces cerevisiae (strain ATCC 204508 / S288c)	Cytochrome c mitochondrial import factor CYC2	0	0	4	1
sp|P38998|LYS1_YEAST	P38998	LYS1_YEAST	LYS1	373	Saccharomyces cerevisiae (strain ATCC 204508 / S288c)	Saccharopine dehydrogenase [NAD(+), L-lysine-forming]	0	0	4	5
sp|P39730|IF2P_YEAST	P39730	IF2P_YEAST	FUN12	1002	Saccharomyces cerevisiae (strain ATCC 204508 / S288c)	Eukaryotic translation initiation factor 5B	0	0	4	5
sp|P39742|SEC72_YEAST	P39742	SEC72_YEAST	SEC72	193	Saccharomyces cerevisiae (strain ATCC 204508 / S288c)	Translocation protein SEC72	0	0	4	2
sp|P40462|TM108_YEAST	P40462	TM108_YEAST	TMA108	946	Saccharomyces cerevisiae (strain ATCC 204508 / S288c)	Protein TMA108	0	0	4	4
sp|P40477|NU159_YEAST	P40477	NU159_YEAST	NUP159	1460	Saccharomyces cerevisiae (strain ATCC 204508 / S288c)	Nucleoporin NUP159	0	0	4	2
sp|P40580|BZRD_YEAST	P40580	BZRD_YEAST	IRC24	263	Saccharomyces cerevisiae (strain ATCC 204508 / S288c)	Benzil reductase ((S)-benzoin forming) IRC24	0	0	4	3
sp|P40959|MVP1_YEAST	P40959	MVP1_YEAST	MVP1	511	Saccharomyces cerevisiae (strain ATCC 204508 / S288c)	Sorting nexin MVP1	0	0	4	9
sp|P42838|LEM3_YEAST	P42838	LEM3_YEAST	LEM3	414	Saccharomyces cerevisiae (strain ATCC 204508 / S288c)	Phospholipid-transporting ATPase accessory subunit LEM3	0	0	4	6
sp|P43570|GYP8_YEAST	P43570	GYP8_YEAST	GYP8	497	Saccharomyces cerevisiae (strain ATCC 204508 / S288c)	GTPase-activating protein GYP8	0	0	4	4
sp|P47013|DS1P1_YEAST	P47013	DS1P1_YEAST	LCB3	409	Saccharomyces cerevisiae (strain ATCC 204508 / S288c)	Dihydrosphingosine 1-phosphate phosphatase LCB3	0	0	4	6
sp|P47042|IKS1_YEAST	P47042	IKS1_YEAST	IKS1	667	Saccharomyces cerevisiae (strain ATCC 204508 / S288c)	Probable serine/threonine-protein kinase IKS1	0	0	4	2
sp|P47155|ILM1_YEAST	P47155	ILM1_YEAST	ILM1	203	Saccharomyces cerevisiae (strain ATCC 204508 / S288c)	Protein ILM1	0	0	4	5
sp|P49018|GPI8_YEAST	P49018	GPI8_YEAST	GPI8	411	Saccharomyces cerevisiae (strain ATCC 204508 / S288c)	GPI-anchor transamidase	0	0	4	7
sp|P49095|GCSP_YEAST	P49095	GCSP_YEAST	GCV2	1034	Saccharomyces cerevisiae (strain ATCC 204508 / S288c)	Glycine dehydrogenase (decarboxylating), mitochondrial	0	0	4	13
sp|P52867|PMT5_YEAST	P52867	PMT5_YEAST	PMT5	743	Saccharomyces cerevisiae (strain ATCC 204508 / S288c)	Dolichyl-phosphate-mannose--protein mannosyltransferase 5	0	0	4	2
sp|P53073|EMC4_YEAST	P53073	EMC4_YEAST	EMC4	190	Saccharomyces cerevisiae (strain ATCC 204508 / S288c)	ER membrane protein complex subunit 4	0	0	4	5
sp|P53093|YIP4_YEAST	P53093	YIP4_YEAST	YIP4	235	Saccharomyces cerevisiae (strain ATCC 204508 / S288c)	Protein YIP4	0	0	4	3
sp|P53120|YGO0_YEAST	P53120	YGO0_YEAST	YGL140C	1219	Saccharomyces cerevisiae (strain ATCC 204508 / S288c)	Uncharacterized membrane protein YGL140C	0	0	4	4
sp|P53228|TAL2_YEAST	P53228	TAL2_YEAST	NQM1	333	Saccharomyces cerevisiae (strain ATCC 204508 / S288c)	Transaldolase NQM1	0	0	4	4
sp|P53262|VOA1_YEAST	P53262	VOA1_YEAST	VOA1	265	Saccharomyces cerevisiae (strain ATCC 204508 / S288c)	V0 assembly protein 1	0	0	4	1
sp|P53297|PBP1_YEAST	P53297	PBP1_YEAST	PBP1	722	Saccharomyces cerevisiae (strain ATCC 204508 / S288c)	PAB1-binding protein 1	0	0	4	2
sp|P53388|DIP5_YEAST	P53388	DIP5_YEAST	DIP5	608	Saccharomyces cerevisiae (strain ATCC 204508 / S288c)	Dicarboxylic amino acid permease	1	0	4	3
sp|P53881|RM22_YEAST	P53881	RM22_YEAST	MRPL22	309	Saccharomyces cerevisiae (strain ATCC 204508 / S288c)	Large ribosomal subunit protein uL22m	0	0	4	2
sp|P53889|FMP41_YEAST	P53889	FMP41_YEAST	FMP41	259	Saccharomyces cerevisiae (strain ATCC 204508 / S288c)	Uncharacterized mitochondrial hydrolase FMP41	0	0	4	6
sp|P81450|ATP18_YEAST	P81450	ATP18_YEAST	ATP18	59	Saccharomyces cerevisiae (strain ATCC 204508 / S288c)	ATP synthase subunit J, mitochondrial	1	0	4	5
sp|Q00582|GTR1_YEAST	Q00582	GTR1_YEAST	GTR1	310	Saccharomyces cerevisiae (strain ATCC 204508 / S288c)	GTP-binding protein GTR1	0	0	4	2
sp|Q00764|TPS1_YEAST	Q00764	TPS1_YEAST	TPS1	495	Saccharomyces cerevisiae (strain ATCC 204508 / S288c)	Alpha,alpha-trehalose-phosphate synthase [UDP-forming] 56 kDa subunit	0	0	4	2
sp|Q01519|COX12_YEAST	Q01519	COX12_YEAST	COX12	83	Saccharomyces cerevisiae (strain ATCC 204508 / S288c)	Cytochrome c oxidase subunit 12, mitochondrial	0	0	4	2
sp|Q02205|MEH1_YEAST	Q02205	MEH1_YEAST	MEH1	184	Saccharomyces cerevisiae (strain ATCC 204508 / S288c)	Protein MEH1	0	0	4	1
sp|Q02629|NU100_YEAST	Q02629	NU100_YEAST	NUP100	959	Saccharomyces cerevisiae (strain ATCC 204508 / S288c)	Nucleoporin NUP100/NSP100	0	0	4	7
sp|Q03218|MMT1_YEAST	Q03218	MMT1_YEAST	MMT1	510	Saccharomyces cerevisiae (strain ATCC 204508 / S288c)	Mitochondrial metal transporter 1	0	0	4	1
sp|Q04201|CUE4_YEAST	Q04201	CUE4_YEAST	CUE4	117	Saccharomyces cerevisiae (strain ATCC 204508 / S288c)	CUE domain-containing protein CUE4	0	0	4	7
sp|Q04969|SPC2_YEAST	Q04969	SPC2_YEAST	SPC2	178	Saccharomyces cerevisiae (strain ATCC 204508 / S288c)	Signal peptidase complex subunit 2	0	0	4	2
sp|Q05892|COQ11_YEAST	Q05892	COQ11_YEAST	COQ11	277	Saccharomyces cerevisiae (strain ATCC 204508 / S288c)	MIOREX complex component 2	0	0	4	7
sp|Q06510|TAZ_YEAST	Q06510	TAZ_YEAST	TAZ1	381	Saccharomyces cerevisiae (strain ATCC 204508 / S288c)	Tafazzin	0	0	4	2
sp|Q06563|SYM1_YEAST	Q06563	SYM1_YEAST	SYM1	197	Saccharomyces cerevisiae (strain ATCC 204508 / S288c)	Protein SYM1	0	0	4	6
sp|Q06636|GPI11_YEAST	Q06636	GPI11_YEAST	GPI11	219	Saccharomyces cerevisiae (strain ATCC 204508 / S288c)	Glycosylphosphatidylinositol anchor biosynthesis protein 11	0	0	4	2
sp|Q08749|TIM18_YEAST	Q08749	TIM18_YEAST	TIM18	192	Saccharomyces cerevisiae (strain ATCC 204508 / S288c)	Mitochondrial import inner membrane translocase subunit TIM18	0	0	4	9
sp|Q12160|YP063_YEAST	Q12160	YP063_YEAST	YPR063C	140	Saccharomyces cerevisiae (strain ATCC 204508 / S288c)	Uncharacterized protein YPR063C	0	0	4	6
sp|Q12265|KPR5_YEAST	Q12265	KPR5_YEAST	PRS5	496	Saccharomyces cerevisiae (strain ATCC 204508 / S288c)	Ribose-phosphate pyrophosphokinase 5	0	0	4	3
sp|Q12335|PST2_YEAST	Q12335	PST2_YEAST	PST2	198	Saccharomyces cerevisiae (strain ATCC 204508 / S288c)	Protoplast secreted protein 2	0	0	4	3
sp|Q12675|ATC4_YEAST	Q12675	ATC4_YEAST	DNF2	1612	Saccharomyces cerevisiae (strain ATCC 204508 / S288c)	Phospholipid-transporting ATPase DNF2	0	0	4	4
sp|Q3E776|YB255_YEAST	Q3E776	YB255_YEAST	YBR255C-A	120	Saccharomyces cerevisiae (strain ATCC 204508 / S288c)	Uncharacterized protein YBR255C-A	0	0	4	2
sp|Q8TGU7|YB126_YEAST	Q8TGU7	YB126_YEAST	YBR126W-A	68	Saccharomyces cerevisiae (strain ATCC 204508 / S288c)	Uncharacterized protein YBR126W-A	0	0	4	3
sp|A5Z2X5|YP010_YEAST	A5Z2X5	YP010_YEAST	YPR010C-A	72	Saccharomyces cerevisiae (strain ATCC 204508 / S288c)	UPF0495 protein YPR010C-A	2	1	3	5
sp|A6ZN14|LIP1_YEAS7	A6ZN14	LIP1_YEAS7	LIP1	150	Saccharomyces cerevisiae (strain YJM789)	Ceramide synthase subunit LIP1	0	0	3	3
sp|A6ZNW6|RTC5_YEAS7	A6ZNW6	RTC5_YEAS7	RTC5	567	Saccharomyces cerevisiae (strain YJM789)	Restriction of telomere capping protein 5	0	0	3	7
sp|A6ZNZ1|MDM32_YEAS7	A6ZNZ1	MDM32_YEAS7	MDM32	622	Saccharomyces cerevisiae (strain YJM789)	Mitochondrial distribution and morphology protein 32	0	0	3	0
sp|A6ZP58|AIM41_YEAS7	A6ZP58	AIM41_YEAS7	AIM41	185	Saccharomyces cerevisiae (strain YJM789)	Altered inheritance of mitochondria protein 41, mitochondrial	0	0	3	2
sp|A6ZYG1|COQ4_YEAS7	A6ZYG1	COQ4_YEAS7	COQ4	335	Saccharomyces cerevisiae (strain YJM789)	Ubiquinone biosynthesis protein COQ4, mitochondrial	0	0	3	6
sp|P00942|TPIS_YEAST	P00942	TPIS_YEAST	TPI1	248	Saccharomyces cerevisiae (strain ATCC 204508 / S288c)	Triosephosphate isomerase	0	0	3	0
sp|P04806|HXKA_YEAST	P04806	HXKA_YEAST	HXK1	485	Saccharomyces cerevisiae (strain ATCC 204508 / S288c)	Hexokinase-1	0	0	3	6
sp|P07260|IF4E_YEAST	P07260	IF4E_YEAST	CDC33	213	Saccharomyces cerevisiae (strain ATCC 204508 / S288c)	Eukaryotic translation initiation factor 4E	0	0	3	1
sp|P07266|MRS1_YEAST	P07266	MRS1_YEAST	MRS1	363	Saccharomyces cerevisiae (strain ATCC 204508 / S288c)	Mitochondrial RNA-splicing protein MRS1	0	0	3	2
sp|P08679|CISY2_YEAST	P08679	CISY2_YEAST	CIT2	460	Saccharomyces cerevisiae (strain ATCC 204508 / S288c)	Citrate synthase, peroxisomal	0	0	3	0
sp|P0C0V8|RS21A_YEAST	P0C0V8	RS21A_YEAST	RPS21A	87	Saccharomyces cerevisiae (strain ATCC 204508 / S288c)	Small ribosomal subunit protein eS21A	0	0	3	2
sp|P0C0W1|RS22A_YEAST	P0C0W1	RS22A_YEAST	RPS22A	130	Saccharomyces cerevisiae (strain ATCC 204508 / S288c)	Small ribosomal subunit protein uS8A	0	0	3	3
sp|P0CX51|RS16A_YEAST	P0CX51	RS16A_YEAST	RPS16A	143	Saccharomyces cerevisiae (strain ATCC 204508 / S288c)	Small ribosomal subunit protein uS9A	0	0	3	3
sp|P12709|G6PI_YEAST	P12709	G6PI_YEAST	PGI1	554	Saccharomyces cerevisiae (strain ATCC 204508 / S288c)	Glucose-6-phosphate isomerase	0	0	3	4
sp|P18414|ERD2_YEAST	P18414	ERD2_YEAST	ERD2	219	Saccharomyces cerevisiae (strain ATCC 204508 / S288c)	ER lumen protein-retaining receptor	0	0	3	4
sp|P24280|SEC14_YEAST	P24280	SEC14_YEAST	SEC14	304	Saccharomyces cerevisiae (strain ATCC 204508 / S288c)	SEC14 cytosolic factor	0	0	3	8
sp|P25625|PER1_YEAST	P25625	PER1_YEAST	PER1	357	Saccharomyces cerevisiae (strain ATCC 204508 / S288c)	Protein PER1	0	0	3	4
sp|P26785|RL16B_YEAST	P26785	RL16B_YEAST	RPL16B	198	Saccharomyces cerevisiae (strain ATCC 204508 / S288c)	Large ribosomal subunit protein uL13B	0	0	3	2
sp|P27472|GYS2_YEAST	P27472	GYS2_YEAST	GSY2	705	Saccharomyces cerevisiae (strain ATCC 204508 / S288c)	Glycogen [starch] synthase isoform 2	0	0	3	2
sp|P30777|GPI10_YEAST	P30777	GPI10_YEAST	GPI10	616	Saccharomyces cerevisiae (strain ATCC 204508 / S288c)	GPI mannosyltransferase 3	0	0	3	3
sp|P31383|2AAA_YEAST	P31383	2AAA_YEAST	TPD3	635	Saccharomyces cerevisiae (strain ATCC 204508 / S288c)	Protein phosphatase PP2A regulatory subunit A	0	0	3	3
sp|P32521|PAN1_YEAST	P32521	PAN1_YEAST	PAN1	1480	Saccharomyces cerevisiae (strain ATCC 204508 / S288c)	Actin cytoskeleton-regulatory complex protein PAN1	0	0	3	1
sp|P32564|SCM4_YEAST	P32564	SCM4_YEAST	SCM4	187	Saccharomyces cerevisiae (strain ATCC 204508 / S288c)	Protein SCM4	0	0	3	4
sp|P32584|STE14_YEAST	P32584	STE14_YEAST	STE14	239	Saccharomyces cerevisiae (strain ATCC 204508 / S288c)	Protein-S-isoprenylcysteine O-methyltransferase	0	0	3	2
sp|P32588|PUB1_YEAST	P32588	PUB1_YEAST	PUB1	453	Saccharomyces cerevisiae (strain ATCC 204508 / S288c)	Nuclear and cytoplasmic polyadenylated RNA-binding protein PUB1	0	0	3	5
sp|P32589|HSP7F_YEAST	P32589	HSP7F_YEAST	SSE1	693	Saccharomyces cerevisiae (strain ATCC 204508 / S288c)	Heat shock protein homolog SSE1	0	0	3	3
sp|P32600|TOR2_YEAST	P32600	TOR2_YEAST	TOR2	2474	Saccharomyces cerevisiae (strain ATCC 204508 / S288c)	Serine/threonine-protein kinase TOR2	0	0	3	2
sp|P32618|YEF3_YEAST	P32618	YEF3_YEAST	YEL043W	956	Saccharomyces cerevisiae (strain ATCC 204508 / S288c)	Uncharacterized protein YEL043W	0	0	3	3
sp|P32787|MG101_YEAST	P32787	MG101_YEAST	MGM101	269	Saccharomyces cerevisiae (strain ATCC 204508 / S288c)	Mitochondrial genome maintenance protein MGM101	0	0	3	4
sp|P34231|YKS7_YEAST	P34231	YKS7_YEAST	YKL187C	750	Saccharomyces cerevisiae (strain ATCC 204508 / S288c)	Uncharacterized protein YKL187C	0	0	3	9
sp|P35196|RER2_YEAST	P35196	RER2_YEAST	RER2	286	Saccharomyces cerevisiae (strain ATCC 204508 / S288c)	Dehydrodolichyl diphosphate synthase complex subunit RER2	0	0	3	6
sp|P35724|MNR2_YEAST	P35724	MNR2_YEAST	MNR2	969	Saccharomyces cerevisiae (strain ATCC 204508 / S288c)	Manganese resistance protein MNR2	1	0	3	0
sp|P35845|OSH1_YEAST	P35845	OSH1_YEAST	SWH1	1188	Saccharomyces cerevisiae (strain ATCC 204508 / S288c)	Oxysterol-binding protein homolog 1	0	0	3	2
sp|P36016|LHS1_YEAST	P36016	LHS1_YEAST	LHS1	881	Saccharomyces cerevisiae (strain ATCC 204508 / S288c)	Heat shock protein 70 homolog LHS1	0	0	3	6
sp|P36029|TPO5_YEAST	P36029	TPO5_YEAST	TPO5	618	Saccharomyces cerevisiae (strain ATCC 204508 / S288c)	Polyamine transporter TPO5	0	0	3	4
sp|P36066|MGR3L_YEAST	P36066	MGR3L_YEAST	YKL133C	463	Saccharomyces cerevisiae (strain ATCC 204508 / S288c)	Protein MRG3-like	0	0	3	5
sp|P36091|DCW1_YEAST	P36091	DCW1_YEAST	DCW1	449	Saccharomyces cerevisiae (strain ATCC 204508 / S288c)	Mannan endo-1,6-alpha-mannosidase DCW1	0	0	3	1
sp|P38061|RL32_YEAST	P38061	RL32_YEAST	RPL32	130	Saccharomyces cerevisiae (strain ATCC 204508 / S288c)	Large ribosomal subunit protein eL32	2	1	3	6
sp|P38088|SYG_YEAST	P38088	SYG_YEAST	GRS1	690	Saccharomyces cerevisiae (strain ATCC 204508 / S288c)	Glycine--tRNA ligase 1, mitochondrial	0	0	3	3
sp|P38211|GPI18_YEAST	P38211	GPI18_YEAST	GPI18	433	Saccharomyces cerevisiae (strain ATCC 204508 / S288c)	GPI mannosyltransferase 2	0	0	3	5
sp|P38247|SLM4_YEAST	P38247	SLM4_YEAST	SLM4	162	Saccharomyces cerevisiae (strain ATCC 204508 / S288c)	Protein SLM4	0	0	3	2
sp|P38427|TSL1_YEAST	P38427	TSL1_YEAST	TSL1	1098	Saccharomyces cerevisiae (strain ATCC 204508 / S288c)	Trehalose synthase complex regulatory subunit TSL1	0	0	3	4
sp|P38523|GRPE_YEAST	P38523	GRPE_YEAST	MGE1	228	Saccharomyces cerevisiae (strain ATCC 204508 / S288c)	GrpE protein homolog, mitochondrial	0	0	3	4
sp|P38775|YHK5_YEAST	P38775	YHK5_YEAST	YHR045W	560	Saccharomyces cerevisiae (strain ATCC 204508 / S288c)	Putative uncharacterized protein YHR045W	0	0	3	4
sp|P38778|SMF2_YEAST	P38778	SMF2_YEAST	SMF2	549	Saccharomyces cerevisiae (strain ATCC 204508 / S288c)	Manganese transporter SMF2	0	0	3	1
sp|P38788|SSZ1_YEAST	P38788	SSZ1_YEAST	SSZ1	538	Saccharomyces cerevisiae (strain ATCC 204508 / S288c)	Ribosome-associated complex subunit SSZ1	0	0	3	3
sp|P38878|LNP_YEAST	P38878	LNP_YEAST	LNP1	278	Saccharomyces cerevisiae (strain ATCC 204508 / S288c)	Endoplasmic reticulum junction formation protein lunapark	0	0	3	2
sp|P38969|PNT1_YEAST	P38969	PNT1_YEAST	PNT1	423	Saccharomyces cerevisiae (strain ATCC 204508 / S288c)	Pentamidine resistance factor, mitochondrial	0	0	3	13
sp|P39518|LCF2_YEAST	P39518	LCF2_YEAST	FAA2	744	Saccharomyces cerevisiae (strain ATCC 204508 / S288c)	Long-chain-fatty-acid--CoA ligase 2	0	0	3	7
sp|P39718|PEX22_YEAST	P39718	PEX22_YEAST	PEX22	180	Saccharomyces cerevisiae (strain ATCC 204508 / S288c)	Peroxisome assembly protein 22	0	0	3	1
sp|P39938|RS26A_YEAST	P39938	RS26A_YEAST	RPS26A	119	Saccharomyces cerevisiae (strain ATCC 204508 / S288c)	Small ribosomal subunit protein eS26A	3	0	3	3
sp|P39994|PXP1_YEAST	P39994	PXP1_YEAST	PXP1	560	Saccharomyces cerevisiae (strain ATCC 204508 / S288c)	Putative 2-hydroxyacyl-CoA lyase	0	0	3	3
sp|P40474|QDR2_YEAST	P40474	QDR2_YEAST	QDR2	542	Saccharomyces cerevisiae (strain ATCC 204508 / S288c)	Quinidine resistance protein 2	0	0	3	5
sp|P40532|APQ12_YEAST	P40532	APQ12_YEAST	APQ12	138	Saccharomyces cerevisiae (strain ATCC 204508 / S288c)	Nuclear membrane organization protein APQ12	0	0	3	3
sp|P40540|EMC5_YEAST	P40540	EMC5_YEAST	EMC5	141	Saccharomyces cerevisiae (strain ATCC 204508 / S288c)	ER membrane protein complex subunit 5	0	0	3	6
sp|P40556|YIA6_YEAST	P40556	YIA6_YEAST	YIA6	373	Saccharomyces cerevisiae (strain ATCC 204508 / S288c)	Mitochondrial nicotinamide adenine dinucleotide transporter 1	0	0	3	7
sp|P40990|MSS2_YEAST	P40990	MSS2_YEAST	MSS2	351	Saccharomyces cerevisiae (strain ATCC 204508 / S288c)	Protein MSS2, mitochondrial	0	0	3	1
sp|P42949|TIM16_YEAST	P42949	TIM16_YEAST	PAM16	149	Saccharomyces cerevisiae (strain ATCC 204508 / S288c)	Mitochondrial import inner membrane translocase subunit TIM16	0	0	3	4
sp|P43567|AGX1_YEAST	P43567	AGX1_YEAST	AGX1	385	Saccharomyces cerevisiae (strain ATCC 204508 / S288c)	Alanine--glyoxylate aminotransferase 1	0	0	3	1
sp|P43614|KEG1_YEAST	P43614	KEG1_YEAST	KEG1	200	Saccharomyces cerevisiae (strain ATCC 204508 / S288c)	Beta-1,6-glucan synthesis-associated protein KEG1	0	0	3	3
sp|P46964|OST2_YEAST	P46964	OST2_YEAST	OST2	130	Saccharomyces cerevisiae (strain ATCC 204508 / S288c)	Dolichyl-diphosphooligosaccharide--protein glycosyltransferase subunit OST2	0	0	3	3
sp|P47052|SDHX_YEAST	P47052	SDHX_YEAST	YJL045W	634	Saccharomyces cerevisiae (strain ATCC 204508 / S288c)	Succinate dehydrogenase [ubiquinone] flavoprotein subunit 2, mitochondrial	0	0	3	1
sp|P48231|TCB2_YEAST	P48231	TCB2_YEAST	TCB2	1178	Saccharomyces cerevisiae (strain ATCC 204508 / S288c)	Tricalbin-2	0	0	3	6
sp|P51996|YPT32_YEAST	P51996	YPT32_YEAST	YPT32	222	Saccharomyces cerevisiae (strain ATCC 204508 / S288c)	GTP-binding protein YPT32/YPT11	0	0	3	4
sp|P52871|SC6B2_YEAST	P52871	SC6B2_YEAST	SBH2	88	Saccharomyces cerevisiae (strain ATCC 204508 / S288c)	Protein transport protein SBH2	0	0	3	1
sp|P53039|YIP1_YEAST	P53039	YIP1_YEAST	YIP1	248	Saccharomyces cerevisiae (strain ATCC 204508 / S288c)	Protein transport protein YIP1	0	0	3	4
sp|P53171|GEP7_YEAST	P53171	GEP7_YEAST	GEP7	287	Saccharomyces cerevisiae (strain ATCC 204508 / S288c)	Genetic interactor of prohibitin 7, mitochondrial	0	0	3	4
sp|P53173|ERV14_YEAST	P53173	ERV14_YEAST	ERV14	138	Saccharomyces cerevisiae (strain ATCC 204508 / S288c)	ER-derived vesicles protein ERV14	0	0	3	4
sp|P53239|COX18_YEAST	P53239	COX18_YEAST	COX18	316	Saccharomyces cerevisiae (strain ATCC 204508 / S288c)	Cytochrome c oxidase assembly protein COX18, mitochondrial	0	0	3	3
sp|P53322|TNA1_YEAST	P53322	TNA1_YEAST	TNA1	534	Saccharomyces cerevisiae (strain ATCC 204508 / S288c)	High-affinity nicotinic acid transporter	0	0	3	3
sp|P53324|SAY1_YEAST	P53324	SAY1_YEAST	SAY1	424	Saccharomyces cerevisiae (strain ATCC 204508 / S288c)	Steryl acetyl hydrolase 1	0	0	3	2
sp|P53845|YIF1_YEAST	P53845	YIF1_YEAST	YIF1	314	Saccharomyces cerevisiae (strain ATCC 204508 / S288c)	Protein transport protein YIF1	0	2	3	6
sp|P53938|EOS1_YEAST	P53938	EOS1_YEAST	EOS1	366	Saccharomyces cerevisiae (strain ATCC 204508 / S288c)	N-glycosylation protein EOS1	0	0	3	4
sp|P54115|ALDH6_YEAST	P54115	ALDH6_YEAST	ALD6	500	Saccharomyces cerevisiae (strain ATCC 204508 / S288c)	Magnesium-activated aldehyde dehydrogenase, cytosolic	0	0	3	10
sp|P54861|DNM1_YEAST	P54861	DNM1_YEAST	DNM1	757	Saccharomyces cerevisiae (strain ATCC 204508 / S288c)	Dynamin-related protein DNM1	0	0	3	1
sp|Q02486|ABF2_YEAST	Q02486	ABF2_YEAST	ABF2	183	Saccharomyces cerevisiae (strain ATCC 204508 / S288c)	ARS-binding factor 2, mitochondrial	0	0	3	2
sp|Q02771|PT117_YEAST	Q02771	PT117_YEAST	PET117	107	Saccharomyces cerevisiae (strain ATCC 204508 / S288c)	Protein PET117, mitochondrial	0	0	3	1
sp|Q02784|GLRX5_YEAST	Q02784	GLRX5_YEAST	GRX5	150	Saccharomyces cerevisiae (strain ATCC 204508 / S288c)	Monothiol glutaredoxin-5, mitochondrial	0	0	3	5
sp|Q02896|YDC1_YEAST	Q02896	YDC1_YEAST	YDC1	317	Saccharomyces cerevisiae (strain ATCC 204508 / S288c)	Alkaline ceramidase YDC1	0	0	3	3
sp|Q03102|YMN1_YEAST	Q03102	YMN1_YEAST	YML131W	365	Saccharomyces cerevisiae (strain ATCC 204508 / S288c)	Uncharacterized membrane protein YML131W	0	0	3	1
sp|Q03455|MSC2_YEAST	Q03455	MSC2_YEAST	MSC2	724	Saccharomyces cerevisiae (strain ATCC 204508 / S288c)	Probable zinc transporter MSC2	0	0	3	3
sp|Q03653|EFR3_YEAST	Q03653	EFR3_YEAST	EFR3	782	Saccharomyces cerevisiae (strain ATCC 204508 / S288c)	Protein EFR3	0	0	3	2
sp|Q03829|MME1_YEAST	Q03829	MME1_YEAST	MME1	368	Saccharomyces cerevisiae (strain ATCC 204508 / S288c)	Mitochondrial magnesium exporter 1	0	0	3	3
sp|Q04516|AIM33_YEAST	Q04516	AIM33_YEAST	AIM33	312	Saccharomyces cerevisiae (strain ATCC 204508 / S288c)	Uncharacterized oxidoreductase AIM33	0	0	3	1
sp|Q05166|NUP59_YEAST	Q05166	NUP59_YEAST	ASM4	528	Saccharomyces cerevisiae (strain ATCC 204508 / S288c)	Nucleoporin ASM4	0	0	3	0
sp|Q05497|YD338_YEAST	Q05497	YD338_YEAST	YDR338C	695	Saccharomyces cerevisiae (strain ATCC 204508 / S288c)	Uncharacterized transporter YDR338C	0	0	3	2
sp|Q05648|MRX10_YEAST	Q05648	MRX10_YEAST	MRX10	414	Saccharomyces cerevisiae (strain ATCC 204508 / S288c)	MIOREX complex component 10	0	0	3	5
sp|Q06179|FMP27_YEAST	Q06179	FMP27_YEAST	FMP27	2628	Saccharomyces cerevisiae (strain ATCC 204508 / S288c)	Protein FMP27, mitochondrial	0	0	3	2
sp|Q06247|YL173_YEAST	Q06247	YL173_YEAST	YLR173W	608	Saccharomyces cerevisiae (strain ATCC 204508 / S288c)	Putative uncharacterized protein YLR173W	0	0	3	2
sp|Q06328|YPQ2_YEAST	Q06328	YPQ2_YEAST	YPQ2	317	Saccharomyces cerevisiae (strain ATCC 204508 / S288c)	Probable vacuolar amino acid transporter YPQ2	0	0	3	3
sp|Q06336|GGA1_YEAST	Q06336	GGA1_YEAST	GGA1	557	Saccharomyces cerevisiae (strain ATCC 204508 / S288c)	ADP-ribosylation factor-binding protein GGA1	0	0	3	2
sp|Q06991|PUN1_YEAST	Q06991	PUN1_YEAST	PUN1	263	Saccharomyces cerevisiae (strain ATCC 204508 / S288c)	Protein PUN1	0	0	3	4
sp|Q07895|YL001_YEAST	Q07895	YL001_YEAST	YLR001C	862	Saccharomyces cerevisiae (strain ATCC 204508 / S288c)	FAS1 domain-containing protein YLR001C	0	0	3	1
sp|Q12306|SMT3_YEAST	Q12306	SMT3_YEAST	SMT3	101	Saccharomyces cerevisiae (strain ATCC 204508 / S288c)	Ubiquitin-like protein SMT3	0	0	3	1
sp|Q12402|YOP1_YEAST	Q12402	YOP1_YEAST	YOP1	180	Saccharomyces cerevisiae (strain ATCC 204508 / S288c)	Protein YOP1	0	0	3	7
sp|Q12464|RUVB2_YEAST	Q12464	RUVB2_YEAST	RVB2	471	Saccharomyces cerevisiae (strain ATCC 204508 / S288c)	RuvB-like protein 2	0	0	3	0
sp|Q12467|MRX4_YEAST	Q12467	MRX4_YEAST	MRX4	430	Saccharomyces cerevisiae (strain ATCC 204508 / S288c)	MIOREX complex component 4	0	0	3	2
sp|Q2V2P4|YI156_YEAST	Q2V2P4	YI156_YEAST	YIL156W-B	73	Saccharomyces cerevisiae (strain ATCC 204508 / S288c)	Uncharacterized protein YIL156W-B	0	0	3	3
sp|Q3E828|EMR1_YEAST	Q3E828	EMR1_YEAST	MCO6	52	Saccharomyces cerevisiae (strain ATCC 204508 / S288c)	ERMES regulator 1	0	0	3	1
tr|A6ZVQ9|A6ZVQ9_YEAS7	A6ZVQ9	A6ZVQ9_YEAS7	FAA3	694	Saccharomyces cerevisiae (strain YJM789)	Long chain fatty acyl-CoA synthetase	0	0	3	1
tr|E9P9Y2|E9P9Y2_YEASX	E9P9Y2	E9P9Y2_YEASX	ILV5G	395	Saccharomyces cerevisiae	Ketol-acid reductoisomerase, mitochondrial	0	0	3	7
sp|A6ZN26|EIF3C_YEAS7	A6ZN26	EIF3C_YEAS7	NIP1	812	Saccharomyces cerevisiae (strain YJM789)	Eukaryotic translation initiation factor 3 subunit C	0	0	2	0
sp|A6ZPJ1|EIF3B_YEAS7	A6ZPJ1	EIF3B_YEAS7	PRT1	765	Saccharomyces cerevisiae (strain YJM789)	Eukaryotic translation initiation factor 3 subunit B	0	0	2	0
sp|A6ZQM4|RRF2M_YEAS7	A6ZQM4	RRF2M_YEAS7	MEF2	819	Saccharomyces cerevisiae (strain YJM789)	Ribosome-releasing factor 2, mitochondrial	0	0	2	2
sp|A6ZR39|GET2_YEAS7	A6ZR39	GET2_YEAS7	GET2	285	Saccharomyces cerevisiae (strain YJM789)	Golgi to ER traffic protein 2	0	0	2	3
sp|A6ZRK4|BLH1_YEAS7	A6ZRK4	BLH1_YEAS7	LAP3	483	Saccharomyces cerevisiae (strain YJM789)	Cysteine proteinase 1, mitochondrial	0	0	2	4
sp|A6ZTX2|MDM34_YEAS7	A6ZTX2	MDM34_YEAS7	MDM34	459	Saccharomyces cerevisiae (strain YJM789)	Mitochondrial distribution and morphology protein 34	0	0	2	6
sp|A6ZUI6|CBP4_YEAS7	A6ZUI6	CBP4_YEAS7	CBP4	147	Saccharomyces cerevisiae (strain YJM789)	Assembly factor CBP4	0	0	2	2
sp|A6ZV78|TPC1_YEAS7	A6ZV78	TPC1_YEAS7	TPC1	314	Saccharomyces cerevisiae (strain YJM789)	Mitochondrial thiamine pyrophosphate carrier 1	0	0	2	6
sp|A6ZXP4|SUB2_YEAS7	A6ZXP4	SUB2_YEAS7	SUB2	446	Saccharomyces cerevisiae (strain YJM789)	ATP-dependent RNA helicase SUB2	0	0	2	3
sp|A6ZYI0|KAD2_YEAS7	A6ZYI0	KAD2_YEAS7	ADK1	222	Saccharomyces cerevisiae (strain YJM789)	Adenylate kinase	0	0	2	3
sp|A6ZZI5|COXM1_YEAS7	A6ZZI5	COXM1_YEAS7	CMC1	111	Saccharomyces cerevisiae (strain YJM789)	COX assembly mitochondrial protein	0	0	2	8
sp|A7A0Q0|MMM1_YEAS7	A7A0Q0	MMM1_YEAS7	MMM1	426	Saccharomyces cerevisiae (strain YJM789)	Maintenance of mitochondrial morphology protein 1	0	0	2	2
sp|B3LKX3|INA17_YEAS1	B3LKX3	INA17_YEAS1	INA17	182	Saccharomyces cerevisiae (strain RM11-1a)	Inner membrane assembly complex subunit 17	0	0	2	2
sp|O74700|TIM9_YEAST	O74700	TIM9_YEAST	TIM9	87	Saccharomyces cerevisiae (strain ATCC 204508 / S288c)	Mitochondrial import inner membrane translocase subunit TIM9	0	0	2	4
sp|P00817|IPYR_YEAST	P00817	IPYR_YEAST	IPP1	287	Saccharomyces cerevisiae (strain ATCC 204508 / S288c)	Inorganic pyrophosphatase	0	0	2	1
sp|P00950|PMG1_YEAST	P00950	PMG1_YEAST	GPM1	247	Saccharomyces cerevisiae (strain ATCC 204508 / S288c)	Phosphoglycerate mutase 1	0	0	2	1
sp|P05737|RL7A_YEAST	P05737	RL7A_YEAST	RPL7A	244	Saccharomyces cerevisiae (strain ATCC 204508 / S288c)	Large ribosomal subunit protein uL30A	0	0	2	5
sp|P07244|PUR2_YEAST	P07244	PUR2_YEAST	ADE57	802	Saccharomyces cerevisiae (strain ATCC 204508 / S288c)	Bifunctional purine biosynthetic protein ADE5,7	0	0	2	2
sp|P09435|HSP73_YEAST	P09435	HSP73_YEAST	SSA3	649	Saccharomyces cerevisiae (strain ATCC 204508 / S288c)	Heat shock protein SSA3	0	0	2	1
sp|P0C268|YB39B_YEAST	P0C268	YB39B_YEAST	YBL039W-B	59	Saccharomyces cerevisiae (strain ATCC 204508 / S288c)	Uncharacterized protein YBL039W-B	0	0	2	0
sp|P0C2H8|RL31A_YEAST	P0C2H8	RL31A_YEAST	RPL31A	113	Saccharomyces cerevisiae (strain ATCC 204508 / S288c)	Large ribosomal subunit protein eL31A	0	0	2	3
sp|P0CX12|COS2_YEAST	P0CX12	COS2_YEAST	COS2	379	Saccharomyces cerevisiae (strain ATCC 204508 / S288c)	Protein COS2	0	0	2	1
sp|P0CX31|RS24A_YEAST	P0CX31	RS24A_YEAST	RPS24A	135	Saccharomyces cerevisiae (strain ATCC 204508 / S288c)	Small ribosomal subunit protein eS24A	0	0	2	1
sp|P10507|MPPB_YEAST	P10507	MPPB_YEAST	MAS1	462	Saccharomyces cerevisiae (strain ATCC 204508 / S288c)	Mitochondrial-processing peptidase subunit beta	0	0	2	1
sp|P10659|METK1_YEAST	P10659	METK1_YEAST	SAM1	382	Saccharomyces cerevisiae (strain ATCC 204508 / S288c)	S-adenosylmethionine synthase 1	1	0	2	4
sp|P10849|MTF2_YEAST	P10849	MTF2_YEAST	MTF2	440	Saccharomyces cerevisiae (strain ATCC 204508 / S288c)	Mitochondrial transcription factor 2	0	0	2	3
sp|P11938|RAP1_YEAST	P11938	RAP1_YEAST	RAP1	827	Saccharomyces cerevisiae (strain ATCC 204508 / S288c)	DNA-binding protein RAP1	0	0	2	2
sp|P13433|RPOM_YEAST	P13433	RPOM_YEAST	RPO41	1351	Saccharomyces cerevisiae (strain ATCC 204508 / S288c)	DNA-directed RNA polymerase, mitochondrial	0	0	2	4
sp|P14907|NSP1_YEAST	P14907	NSP1_YEAST	NSP1	823	Saccharomyces cerevisiae (strain ATCC 204508 / S288c)	Nucleoporin NSP1	0	0	2	3
sp|P14922|CYC8_YEAST	P14922	CYC8_YEAST	CYC8	966	Saccharomyces cerevisiae (strain ATCC 204508 / S288c)	General transcriptional corepressor CYC8	0	0	2	0
sp|P15019|TAL1_YEAST	P15019	TAL1_YEAST	TAL1	335	Saccharomyces cerevisiae (strain ATCC 204508 / S288c)	Transaldolase	0	0	2	2
sp|P15705|STI1_YEAST	P15705	STI1_YEAST	STI1	589	Saccharomyces cerevisiae (strain ATCC 204508 / S288c)	Heat shock protein STI1	0	0	2	4
sp|P16861|PFKA1_YEAST	P16861	PFKA1_YEAST	PFK1	987	Saccharomyces cerevisiae (strain ATCC 204508 / S288c)	ATP-dependent 6-phosphofructokinase subunit alpha	0	0	2	4
sp|P19956|RM44_YEAST	P19956	RM44_YEAST	MRPL44	98	Saccharomyces cerevisiae (strain ATCC 204508 / S288c)	Large ribosomal subunit protein mL53	0	0	2	5
sp|P20081|FKBP_YEAST	P20081	FKBP_YEAST	FPR1	114	Saccharomyces cerevisiae (strain ATCC 204508 / S288c)	FK506-binding protein 1	3	4	2	3
sp|P21306|ATP5E_YEAST	P21306	ATP5E_YEAST	ATP15	62	Saccharomyces cerevisiae (strain ATCC 204508 / S288c)	ATP synthase subunit epsilon, mitochondrial	0	0	2	1
sp|P22213|SLY1_YEAST	P22213	SLY1_YEAST	SLY1	666	Saccharomyces cerevisiae (strain ATCC 204508 / S288c)	Protein SLY1	0	0	2	3
sp|P22214|SEC22_YEAST	P22214	SEC22_YEAST	SEC22	214	Saccharomyces cerevisiae (strain ATCC 204508 / S288c)	Protein transport protein SEC22	0	0	2	0
sp|P23642|VAN1_YEAST	P23642	VAN1_YEAST	VAN1	535	Saccharomyces cerevisiae (strain ATCC 204508 / S288c)	Mannan polymerase I complex VAN1 subunit	0	0	2	2
sp|P25339|PUF4_YEAST	P25339	PUF4_YEAST	PUF4	888	Saccharomyces cerevisiae (strain ATCC 204508 / S288c)	Pumilio homology domain family member 4	0	0	2	0
sp|P25623|SYP1_YEAST	P25623	SYP1_YEAST	SYP1	870	Saccharomyces cerevisiae (strain ATCC 204508 / S288c)	Suppressor of yeast profilin deletion	0	0	2	5
sp|P25626|IMG1_YEAST	P25626	IMG1_YEAST	IMG1	169	Saccharomyces cerevisiae (strain ATCC 204508 / S288c)	Large ribosomal subunit protein bL19m	0	0	2	1
sp|P25628|ARE1_YEAST	P25628	ARE1_YEAST	ARE1	610	Saccharomyces cerevisiae (strain ATCC 204508 / S288c)	Sterol O-acyltransferase 1	0	0	2	4
sp|P25847|MSH2_YEAST	P25847	MSH2_YEAST	MSH2	964	Saccharomyces cerevisiae (strain ATCC 204508 / S288c)	DNA mismatch repair protein MSH2	0	0	2	1
sp|P26783|RS5_YEAST	P26783	RS5_YEAST	RPS5	225	Saccharomyces cerevisiae (strain ATCC 204508 / S288c)	Small ribosomal subunit protein uS7	0	0	2	3
sp|P28795|PEX3_YEAST	P28795	PEX3_YEAST	PEX3	441	Saccharomyces cerevisiae (strain ATCC 204508 / S288c)	Peroxisomal biogenesis factor 3	0	0	2	2
sp|P29465|CHS3_YEAST	P29465	CHS3_YEAST	CHS3	1165	Saccharomyces cerevisiae (strain ATCC 204508 / S288c)	Chitin synthase 3	0	0	2	2
sp|P32449|AROG_YEAST	P32449	AROG_YEAST	ARO4	370	Saccharomyces cerevisiae (strain ATCC 204508 / S288c)	Phospho-2-dehydro-3-deoxyheptonate aldolase, tyrosine-inhibited	0	0	2	1
sp|P32453|ATP11_YEAST	P32453	ATP11_YEAST	ATP11	318	Saccharomyces cerevisiae (strain ATCC 204508 / S288c)	Protein ATP11, mitochondrial	0	0	2	4
sp|P32474|EUG1_YEAST	P32474	EUG1_YEAST	EUG1	517	Saccharomyces cerevisiae (strain ATCC 204508 / S288c)	Protein disulfide-isomerase EUG1	0	0	2	2
sp|P32590|HSP79_YEAST	P32590	HSP79_YEAST	SSE2	693	Saccharomyces cerevisiae (strain ATCC 204508 / S288c)	Heat shock protein homolog SSE2	0	0	2	0
sp|P33309|DOM34_YEAST	P33309	DOM34_YEAST	DOM34	386	Saccharomyces cerevisiae (strain ATCC 204508 / S288c)	Protein DOM34	0	0	2	3
sp|P36057|SRPB_YEAST	P36057	SRPB_YEAST	SRP102	244	Saccharomyces cerevisiae (strain ATCC 204508 / S288c)	Signal recognition particle receptor subunit beta	0	0	2	2
sp|P36096|TUL1_YEAST	P36096	TUL1_YEAST	TUL1	758	Saccharomyces cerevisiae (strain ATCC 204508 / S288c)	Transmembrane E3 ubiquitin-protein ligase 1	0	0	2	0
sp|P36105|RL14A_YEAST	P36105	RL14A_YEAST	RPL14A	138	Saccharomyces cerevisiae (strain ATCC 204508 / S288c)	Large ribosomal subunit protein eL14A	3	0	2	1
sp|P36142|TM184_YEAST	P36142	TM184_YEAST	YKR051W	418	Saccharomyces cerevisiae (strain ATCC 204508 / S288c)	Transmembrane protein 184 homolog YKR051W	0	0	2	3
sp|P37020|GEF1_YEAST	P37020	GEF1_YEAST	GEF1	779	Saccharomyces cerevisiae (strain ATCC 204508 / S288c)	Anion/proton exchange transporter GEF1	0	0	2	4
sp|P38242|ALG14_YEAST	P38242	ALG14_YEAST	ALG14	237	Saccharomyces cerevisiae (strain ATCC 204508 / S288c)	UDP-N-acetylglucosamine transferase subunit ALG14	0	0	2	2
sp|P38298|YPC1_YEAST	P38298	YPC1_YEAST	YPC1	316	Saccharomyces cerevisiae (strain ATCC 204508 / S288c)	Alkaline ceramidase YPC1	0	0	2	3
sp|P38342|TSC10_YEAST	P38342	TSC10_YEAST	TSC10	320	Saccharomyces cerevisiae (strain ATCC 204508 / S288c)	3-ketodihydrosphingosine reductase TSC10	0	0	2	2
sp|P38702|LEU5_YEAST	P38702	LEU5_YEAST	LEU5	357	Saccharomyces cerevisiae (strain ATCC 204508 / S288c)	Mitochondrial carrier protein LEU5	0	0	2	5
sp|P38720|6PGD1_YEAST	P38720	6PGD1_YEAST	GND1	489	Saccharomyces cerevisiae (strain ATCC 204508 / S288c)	6-phosphogluconate dehydrogenase, decarboxylating 1	0	0	2	2
sp|P38770|BRL1_YEAST	P38770	BRL1_YEAST	BRL1	471	Saccharomyces cerevisiae (strain ATCC 204508 / S288c)	Nucleus export protein BRL1	0	0	2	0
sp|P38771|RRF1_YEAST	P38771	RRF1_YEAST	RRF1	230	Saccharomyces cerevisiae (strain ATCC 204508 / S288c)	Ribosome-recycling factor, mitochondrial	0	0	2	1
sp|P38873|KOG1_YEAST	P38873	KOG1_YEAST	KOG1	1557	Saccharomyces cerevisiae (strain ATCC 204508 / S288c)	Target of rapamycin complex 1 subunit KOG1	0	0	2	6
sp|P38903|2A5D_YEAST	P38903	2A5D_YEAST	RTS1	757	Saccharomyces cerevisiae (strain ATCC 204508 / S288c)	Serine/threonine-protein phosphatase 2A 56 kDa regulatory subunit delta isoform	0	0	2	5
sp|P38932|VPS45_YEAST	P38932	VPS45_YEAST	VPS45	577	Saccharomyces cerevisiae (strain ATCC 204508 / S288c)	Vacuolar protein sorting-associated protein 45	0	0	2	1
sp|P38958|PT100_YEAST	P38958	PT100_YEAST	PET100	111	Saccharomyces cerevisiae (strain ATCC 204508 / S288c)	Protein PET100, mitochondrial	0	0	2	3
sp|P39101|CAJ1_YEAST	P39101	CAJ1_YEAST	CAJ1	391	Saccharomyces cerevisiae (strain ATCC 204508 / S288c)	Protein CAJ1	0	0	2	0
sp|P39705|NUP60_YEAST	P39705	NUP60_YEAST	NUP60	539	Saccharomyces cerevisiae (strain ATCC 204508 / S288c)	Nucleoporin NUP60	0	0	2	0
sp|P39953|YEA6_YEAST	P39953	YEA6_YEAST	YEA6	335	Saccharomyces cerevisiae (strain ATCC 204508 / S288c)	Mitochondrial nicotinamide adenine dinucleotide transporter 2	0	0	2	2
sp|P39954|SAHH_YEAST	P39954	SAHH_YEAST	SAH1	449	Saccharomyces cerevisiae (strain ATCC 204508 / S288c)	Adenosylhomocysteinase	0	0	2	2
sp|P39958|GDI1_YEAST	P39958	GDI1_YEAST	GDI1	451	Saccharomyces cerevisiae (strain ATCC 204508 / S288c)	Rab GDP-dissociation inhibitor	0	0	2	2
sp|P40016|RPN3_YEAST	P40016	RPN3_YEAST	RPN3	523	Saccharomyces cerevisiae (strain ATCC 204508 / S288c)	26S proteasome regulatory subunit RPN3	0	0	2	1
sp|P40150|SSB2_YEAST	P40150	SSB2_YEAST	SSB2	613	Saccharomyces cerevisiae (strain ATCC 204508 / S288c)	Ribosome-associated molecular chaperone SSB2	0	0	2	2
sp|P40308|TGL3_YEAST	P40308	TGL3_YEAST	TGL3	642	Saccharomyces cerevisiae (strain ATCC 204508 / S288c)	Triacylglycerol lipase 3	0	0	2	3
sp|P40309|KHA1_YEAST	P40309	KHA1_YEAST	KHA1	873	Saccharomyces cerevisiae (strain ATCC 204508 / S288c)	K(+)/H(+) antiporter 1	0	0	2	1
sp|P40525|RL34B_YEAST	P40525	RL34B_YEAST	RPL34B	121	Saccharomyces cerevisiae (strain ATCC 204508 / S288c)	Large ribosomal subunit protein eL34B	0	0	2	1
sp|P40994|ARF3_YEAST	P40994	ARF3_YEAST	ARF3	183	Saccharomyces cerevisiae (strain ATCC 204508 / S288c)	ADP-ribosylation factor 3	0	0	2	3
sp|P41911|GPD2_YEAST	P41911	GPD2_YEAST	GPD2	440	Saccharomyces cerevisiae (strain ATCC 204508 / S288c)	Glycerol-3-phosphate dehydrogenase [NAD(+)] 2, mitochondrial	0	0	2	1
sp|P43560|LAM5_YEAST	P43560	LAM5_YEAST	LAM5	674	Saccharomyces cerevisiae (strain ATCC 204508 / S288c)	Membrane-anchored lipid-binding protein LAM5	0	0	2	2
sp|P46784|RS10B_YEAST	P46784	RS10B_YEAST	RPS10B	105	Saccharomyces cerevisiae (strain ATCC 204508 / S288c)	Small ribosomal subunit protein eS10B	0	0	2	0
sp|P46985|MNN11_YEAST	P46985	MNN11_YEAST	MNN11	422	Saccharomyces cerevisiae (strain ATCC 204508 / S288c)	Probable alpha-1,6-mannosyltransferase MNN11	0	0	2	4
sp|P47026|GWT1_YEAST	P47026	GWT1_YEAST	GWT1	490	Saccharomyces cerevisiae (strain ATCC 204508 / S288c)	GPI-anchored wall transfer protein 1	0	0	2	5
sp|P47081|COX16_YEAST	P47081	COX16_YEAST	COX16	118	Saccharomyces cerevisiae (strain ATCC 204508 / S288c)	Cytochrome c oxidase assembly protein COX16, mitochondrial	0	0	2	2
sp|P47140|AIM25_YEAST	P47140	AIM25_YEAST	AIM25	327	Saccharomyces cerevisiae (strain ATCC 204508 / S288c)	Altered inheritance rate of mitochondria protein 25	0	0	2	4
sp|P48569|YD183_YEAST	P48569	YD183_YEAST	YDL183C	320	Saccharomyces cerevisiae (strain ATCC 204508 / S288c)	Uncharacterized protein YDL183C	0	0	2	7
sp|P52870|SC6B1_YEAST	P52870	SC6B1_YEAST	SBH1	82	Saccharomyces cerevisiae (strain ATCC 204508 / S288c)	Protein transport protein SBH1	0	0	2	2
sp|P53011|SEH1_YEAST	P53011	SEH1_YEAST	SEH1	349	Saccharomyces cerevisiae (strain ATCC 204508 / S288c)	Nucleoporin SEH1	0	0	2	3
sp|P53108|YIP5_YEAST	P53108	YIP5_YEAST	YIP5	310	Saccharomyces cerevisiae (strain ATCC 204508 / S288c)	Protein YIP5	0	0	2	3
sp|P53155|YGI2_YEAST	P53155	YGI2_YEAST	YGL082W	381	Saccharomyces cerevisiae (strain ATCC 204508 / S288c)	Uncharacterized protein YGL082W	0	0	2	4
sp|P53220|TIM21_YEAST	P53220	TIM21_YEAST	TIM21	239	Saccharomyces cerevisiae (strain ATCC 204508 / S288c)	Mitochondrial import inner membrane translocase subunit TIM21	0	0	2	2
sp|P53253|NNF2_YEAST	P53253	NNF2_YEAST	NNF2	936	Saccharomyces cerevisiae (strain ATCC 204508 / S288c)	Protein NNF2	0	0	2	3
sp|P53259|PCP1_YEAST	P53259	PCP1_YEAST	PCP1	346	Saccharomyces cerevisiae (strain ATCC 204508 / S288c)	Rhomboid protein 1, mitochondrial	0	0	2	4
sp|P57744|TIM8_YEAST	P57744	TIM8_YEAST	TIM8	87	Saccharomyces cerevisiae (strain ATCC 204508 / S288c)	Mitochondrial import inner membrane translocase subunit TIM8	0	0	2	2
sp|P81451|ATP19_YEAST	P81451	ATP19_YEAST	ATP19	68	Saccharomyces cerevisiae (strain ATCC 204508 / S288c)	ATP synthase subunit K, mitochondrial	0	0	2	1
sp|Q01802|AATM_YEAST	Q01802	AATM_YEAST	AAT1	451	Saccharomyces cerevisiae (strain ATCC 204508 / S288c)	Aspartate aminotransferase, mitochondrial	0	0	2	0
sp|Q01855|RS15_YEAST	Q01855	RS15_YEAST	RPS15	142	Saccharomyces cerevisiae (strain ATCC 204508 / S288c)	Small ribosomal subunit protein uS19	0	0	2	4
sp|Q02159|UBC7_YEAST	Q02159	UBC7_YEAST	UBC7	165	Saccharomyces cerevisiae (strain ATCC 204508 / S288c)	Ubiquitin-conjugating enzyme E2 7	0	0	2	2
sp|Q02630|NU116_YEAST	Q02630	NU116_YEAST	NUP116	1113	Saccharomyces cerevisiae (strain ATCC 204508 / S288c)	Nucleoporin NUP116/NSP116	1	0	2	4
sp|Q02932|KA120_YEAST	Q02932	KA120_YEAST	KAP120	1032	Saccharomyces cerevisiae (strain ATCC 204508 / S288c)	Importin beta-like protein KAP120	0	0	2	4
sp|Q03195|RLI1_YEAST	Q03195	RLI1_YEAST	RLI1	608	Saccharomyces cerevisiae (strain ATCC 204508 / S288c)	Translation initiation factor RLI1	0	0	2	1
sp|Q03430|RSM28_YEAST	Q03430	RSM28_YEAST	RSM28	361	Saccharomyces cerevisiae (strain ATCC 204508 / S288c)	Small ribosomal subunit protein mS46	0	0	2	2
sp|Q03441|RMD1_YEAST	Q03441	RMD1_YEAST	RMD1	430	Saccharomyces cerevisiae (strain ATCC 204508 / S288c)	Sporulation protein RMD1	0	0	2	6
sp|Q03674|PLB2_YEAST	Q03674	PLB2_YEAST	PLB2	706	Saccharomyces cerevisiae (strain ATCC 204508 / S288c)	Lysophospholipase 2	0	0	2	2
sp|Q03723|OST6_YEAST	Q03723	OST6_YEAST	OST6	332	Saccharomyces cerevisiae (strain ATCC 204508 / S288c)	Dolichyl-diphosphooligosaccharide--protein glycosyltransferase subunit OST6	0	0	2	2
sp|Q03860|TVP15_YEAST	Q03860	TVP15_YEAST	TVP15	143	Saccharomyces cerevisiae (strain ATCC 204508 / S288c)	Golgi apparatus membrane protein TVP15	0	0	2	1
sp|Q04162|YD387_YEAST	Q04162	YD387_YEAST	YDR387C	555	Saccharomyces cerevisiae (strain ATCC 204508 / S288c)	Probable metabolite transport protein YDR387C	0	0	2	4
sp|Q04344|HNT1_YEAST	Q04344	HNT1_YEAST	HNT1	158	Saccharomyces cerevisiae (strain ATCC 204508 / S288c)	Adenosine 5'-monophosphoramidase HNT1	0	0	2	1
sp|Q06144|ORM2_YEAST	Q06144	ORM2_YEAST	ORM2	216	Saccharomyces cerevisiae (strain ATCC 204508 / S288c)	Protein ORM2	0	0	2	6
sp|Q06147|LCB5_YEAST	Q06147	LCB5_YEAST	LCB5	687	Saccharomyces cerevisiae (strain ATCC 204508 / S288c)	Sphingoid long chain base kinase 5	0	0	2	2
sp|Q06170|YL326_YEAST	Q06170	YL326_YEAST	YLR326W	240	Saccharomyces cerevisiae (strain ATCC 204508 / S288c)	Uncharacterized membrane protein YLR326W	0	0	2	2
sp|Q06346|KEI1_YEAST	Q06346	KEI1_YEAST	KEI1	221	Saccharomyces cerevisiae (strain ATCC 204508 / S288c)	Inositol phosphorylceramide synthase regulatory subunit KEI1	0	0	2	1
sp|Q06604|BSP1_YEAST	Q06604	BSP1_YEAST	BSP1	576	Saccharomyces cerevisiae (strain ATCC 204508 / S288c)	Protein BSP1	0	0	2	0
sp|Q07468|VAM6_YEAST	Q07468	VAM6_YEAST	VAM6	1049	Saccharomyces cerevisiae (strain ATCC 204508 / S288c)	Vacuolar morphogenesis protein 6	0	0	2	9
sp|Q07914|TIM14_YEAST	Q07914	TIM14_YEAST	PAM18	168	Saccharomyces cerevisiae (strain ATCC 204508 / S288c)	Mitochondrial import inner membrane translocase subunit TIM14	0	0	2	3
sp|Q07979|RSC58_YEAST	Q07979	RSC58_YEAST	RSC58	502	Saccharomyces cerevisiae (strain ATCC 204508 / S288c)	Chromatin structure-remodeling complex protein RSC58	0	0	2	1
sp|Q08176|MIM1_YEAST	Q08176	MIM1_YEAST	MIM1	113	Saccharomyces cerevisiae (strain ATCC 204508 / S288c)	Mitochondrial import protein 1	0	0	2	4
sp|Q08926|UIP4_YEAST	Q08926	UIP4_YEAST	UIP4	304	Saccharomyces cerevisiae (strain ATCC 204508 / S288c)	ULP1-interacting protein 4	0	0	2	3
sp|Q08954|YP199_YEAST	Q08954	YP199_YEAST	YPL199C	240	Saccharomyces cerevisiae (strain ATCC 204508 / S288c)	Smr domain-containing protein YPL199C	0	0	2	2
sp|Q08965|BMS1_YEAST	Q08965	BMS1_YEAST	BMS1	1183	Saccharomyces cerevisiae (strain ATCC 204508 / S288c)	Ribosome biogenesis protein BMS1	1	0	2	0
sp|Q12003|ENV7_YEAST	Q12003	ENV7_YEAST	ENV7	364	Saccharomyces cerevisiae (strain ATCC 204508 / S288c)	Serine/threonine-protein kinase ENV7	0	0	2	2
sp|Q12016|VPS68_YEAST	Q12016	VPS68_YEAST	VPS68	184	Saccharomyces cerevisiae (strain ATCC 204508 / S288c)	Vacuolar protein sorting-associated protein 68	0	0	2	3
sp|Q12133|SPC3_YEAST	Q12133	SPC3_YEAST	SPC3	184	Saccharomyces cerevisiae (strain ATCC 204508 / S288c)	Signal peptidase complex subunit 3	0	0	2	2
sp|Q12144|PER33_YEAST	Q12144	PER33_YEAST	PER33	273	Saccharomyces cerevisiae (strain ATCC 204508 / S288c)	Pore and endoplasmic reticulum protein of 33 kDa	0	0	2	3
sp|Q12155|YL050_YEAST	Q12155	YL050_YEAST	YLR050C	161	Saccharomyces cerevisiae (strain ATCC 204508 / S288c)	Uncharacterized membrane protein YLR050C	0	0	2	3
sp|Q12255|NYV1_YEAST	Q12255	NYV1_YEAST	NYV1	253	Saccharomyces cerevisiae (strain ATCC 204508 / S288c)	Vacuolar v-SNARE NYV1	0	0	2	4
sp|Q12274|YOR97_YEAST	Q12274	YOR97_YEAST	YOR097C	175	Saccharomyces cerevisiae (strain ATCC 204508 / S288c)	Uncharacterized protein YOR097C	0	0	2	0
sp|Q12328|TIM22_YEAST	Q12328	TIM22_YEAST	TIM22	207	Saccharomyces cerevisiae (strain ATCC 204508 / S288c)	Mitochondrial import inner membrane translocase subunit TIM22	0	0	2	7
sp|Q12349|ATP14_YEAST	Q12349	ATP14_YEAST	ATP14	124	Saccharomyces cerevisiae (strain ATCC 204508 / S288c)	ATP synthase subunit H, mitochondrial	0	0	2	7
sp|Q12405|LPX1_YEAST	Q12405	LPX1_YEAST	LPX1	387	Saccharomyces cerevisiae (strain ATCC 204508 / S288c)	Peroxisomal membrane protein LPX1	0	0	2	2
sp|Q12442|IZH2_YEAST	Q12442	IZH2_YEAST	IZH2	317	Saccharomyces cerevisiae (strain ATCC 204508 / S288c)	ADIPOR-like receptor IZH2	0	0	2	2
sp|Q2V2P9|COX26_YEAST	Q2V2P9	COX26_YEAST	COX26	66	Saccharomyces cerevisiae (strain ATCC 204508 / S288c)	Cytochrome c oxidase subunit 26, mitochondrial	0	0	2	2
sp|Q3E6R5|YD381_YEAST	Q3E6R5	YD381_YEAST	YDR381C-A	114	Saccharomyces cerevisiae (strain ATCC 204508 / S288c)	Uncharacterized mitochondrial outer membrane protein YDR381C-A	0	0	2	2
sp|Q3E756|YB029_YEAST	Q3E756	YB029_YEAST	YBL029C-A	94	Saccharomyces cerevisiae (strain ATCC 204508 / S288c)	UPF0768 protein YBL029C-A	0	0	2	1
sp|Q3E798|MIM2_YEAST	Q3E798	MIM2_YEAST	MIM2	87	Saccharomyces cerevisiae (strain ATCC 204508 / S288c)	Mitochondrial import protein 2	0	0	2	2
sp|Q99382|ENV10_YEAST	Q99382	ENV10_YEAST	ENV10	181	Saccharomyces cerevisiae (strain ATCC 204508 / S288c)	SRP-independent targeting protein 2	0	0	2	10
tr|C8ZI37|C8ZI37_YEAS8	C8ZI37	C8ZI37_YEAS8	EC1118_1O4_2806g	345	Saccharomyces cerevisiae (strain Lalvin	Ufe1p	0	0	2	6
tr|G2WE85|G2WE85_YEASK	G2WE85	G2WE85_YEASK	K7_PMA1	918	Saccharomyces cerevisiae (strain Kyokai no. 7 /	Plasma membrane ATPase	1	0	2	1
sp|A6ZL22|ECM33_YEAS7	A6ZL22	ECM33_YEAS7	ECM33	429	Saccharomyces cerevisiae (strain YJM789)	Cell wall protein ECM33	3	0	1	0
sp|A6ZMK7|OSW5_YEAS7	A6ZMK7	OSW5_YEAS7	OSW5	148	Saccharomyces cerevisiae (strain YJM789)	Outer spore wall protein 5	0	0	1	1
sp|A6ZPP2|IML2_YEAS7	A6ZPP2	IML2_YEAS7	IML2	731	Saccharomyces cerevisiae (strain YJM789)	Inclusion body clearance protein IML2	0	0	1	1
sp|A6ZR21|RGI1_YEAS7	A6ZR21	RGI1_YEAS7	RGI1	161	Saccharomyces cerevisiae (strain YJM789)	Respiratory growth induced protein 1	0	0	1	2
sp|A6ZRW6|MLS1_YEAS7	A6ZRW6	MLS1_YEAS7	MLS1	554	Saccharomyces cerevisiae (strain YJM789)	Malate synthase 1	0	0	1	1
sp|A6ZSX1|RRP3_YEAS7	A6ZSX1	RRP3_YEAS7	RRP3	501	Saccharomyces cerevisiae (strain YJM789)	ATP-dependent rRNA helicase RRP3	0	0	1	4
sp|A6ZTW6|GMT1_YEAS7	A6ZTW6	GMT1_YEAS7	VRG4	337	Saccharomyces cerevisiae (strain YJM789)	GDP-mannose transporter 1	0	0	1	1
sp|A6ZUK8|YPP1_YEAS7	A6ZUK8	YPP1_YEAS7	YPP1	817	Saccharomyces cerevisiae (strain YJM789)	Cargo-transport protein YPP1	0	0	1	3
sp|A6ZZJ6|SSH4_YEAS7	A6ZZJ6	SSH4_YEAS7	SSH4	579	Saccharomyces cerevisiae (strain YJM789)	Protein SSH4	0	0	1	0
sp|D6VTK4|STE2_YEAST	D6VTK4	STE2_YEAST	STE2	431	Saccharomyces cerevisiae (strain ATCC 204508 / S288c)	Pheromone alpha factor receptor	0	0	1	2
sp|P02557|TBB_YEAST	P02557	TBB_YEAST	TUB2	457	Saccharomyces cerevisiae (strain ATCC 204508 / S288c)	Tubulin beta chain	0	0	1	3
sp|P04050|RPB1_YEAST	P04050	RPB1_YEAST	RPO21	1733	Saccharomyces cerevisiae (strain ATCC 204508 / S288c)	DNA-directed RNA polymerase II subunit RPB1	0	0	1	2
sp|P05743|RL26A_YEAST	P05743	RL26A_YEAST	RPL26A	127	Saccharomyces cerevisiae (strain ATCC 204508 / S288c)	Large ribosomal subunit protein uL24A	0	0	1	3
sp|P06704|CDC31_YEAST	P06704	CDC31_YEAST	CDC31	161	Saccharomyces cerevisiae (strain ATCC 204508 / S288c)	Cell division control protein 31	0	0	1	0
sp|P06738|PHSG_YEAST	P06738	PHSG_YEAST	GPH1	902	Saccharomyces cerevisiae (strain ATCC 204508 / S288c)	Glycogen phosphorylase	0	0	1	1
sp|P09232|PRTB_YEAST	P09232	PRTB_YEAST	PRB1	635	Saccharomyces cerevisiae (strain ATCC 204508 / S288c)	Cerevisin	0	0	1	2
sp|P0CX27|RL44A_YEAST	P0CX27	RL44A_YEAST	RPL42A	106	Saccharomyces cerevisiae (strain ATCC 204508 / S288c)	Large ribosomal subunit protein eL42A	0	0	1	0
sp|P11325|SYLM_YEAST	P11325	SYLM_YEAST	NAM2	894	Saccharomyces cerevisiae (strain ATCC 204508 / S288c)	Leucine--tRNA ligase, mitochondrial	0	0	1	0
sp|P12611|WHI2_YEAST	P12611	WHI2_YEAST	WHI2	486	Saccharomyces cerevisiae (strain ATCC 204508 / S288c)	Growth regulation protein	0	0	1	0
sp|P14359|SNA3_YEAST	P14359	SNA3_YEAST	SNA3	133	Saccharomyces cerevisiae (strain ATCC 204508 / S288c)	Protein SNA3	0	0	1	2
sp|P14832|CYPH_YEAST	P14832	CYPH_YEAST	CPR1	162	Saccharomyces cerevisiae (strain ATCC 204508 / S288c)	Peptidyl-prolyl cis-trans isomerase	0	0	1	4
sp|P15303|SEC23_YEAST	P15303	SEC23_YEAST	SEC23	768	Saccharomyces cerevisiae (strain ATCC 204508 / S288c)	Protein transport protein SEC23	0	0	1	3
sp|P15625|SYFA_YEAST	P15625	SYFA_YEAST	FRS2	503	Saccharomyces cerevisiae (strain ATCC 204508 / S288c)	Phenylalanine--tRNA ligase alpha subunit	0	0	1	1
sp|P15646|FBRL_YEAST	P15646	FBRL_YEAST	NOP1	327	Saccharomyces cerevisiae (strain ATCC 204508 / S288c)	rRNA 2'-O-methyltransferase fibrillarin	0	0	1	1
sp|P17106|CBF1_YEAST	P17106	CBF1_YEAST	CBF1	351	Saccharomyces cerevisiae (strain ATCC 204508 / S288c)	Centromere-binding protein 1	0	0	1	1
sp|P17157|PHO85_YEAST	P17157	PHO85_YEAST	PHO85	305	Saccharomyces cerevisiae (strain ATCC 204508 / S288c)	Cyclin-dependent protein kinase PHO85	0	0	1	0
sp|P17558|RTPT_YEAST	P17558	RTPT_YEAST	PET123	318	Saccharomyces cerevisiae (strain ATCC 204508 / S288c)	Small ribosomal subunit protein mS26	0	0	1	0
sp|P19454|CSK22_YEAST	P19454	CSK22_YEAST	CKA2	339	Saccharomyces cerevisiae (strain ATCC 204508 / S288c)	Casein kinase II subunit alpha'	0	0	1	0
sp|P22133|MDHC_YEAST	P22133	MDHC_YEAST	MDH2	377	Saccharomyces cerevisiae (strain ATCC 204508 / S288c)	Malate dehydrogenase, cytoplasmic	0	0	1	1
sp|P22146|GAS1_YEAST	P22146	GAS1_YEAST	GAS1	559	Saccharomyces cerevisiae (strain ATCC 204508 / S288c)	1,3-beta-glucanosyltransferase GAS1	0	0	1	4
sp|P22215|SLY41_YEAST	P22215	SLY41_YEAST	SLY41	453	Saccharomyces cerevisiae (strain ATCC 204508 / S288c)	Uncharacterized transporter SLY41	0	0	1	1
sp|P22281|ALDHX_YEASX	P22281	ALDHX_YEASX	ALD1	533	Saccharomyces cerevisiae	Aldehyde dehydrogenase 1, mitochondrial	0	0	1	2
sp|P22289|QCR9_YEAST	P22289	QCR9_YEAST	QCR9	66	Saccharomyces cerevisiae (strain ATCC 204508 / S288c)	Cytochrome b-c1 complex subunit 9, mitochondrial	0	0	1	1
sp|P22354|RM20_YEAST	P22354	RM20_YEAST	MRPL20	195	Saccharomyces cerevisiae (strain ATCC 204508 / S288c)	Large ribosomal subunit protein mL58	0	0	1	0
sp|P25361|YCT3_YEAST	P25361	YCT3_YEAST	YCR043C	127	Saccharomyces cerevisiae (strain ATCC 204508 / S288c)	Uncharacterized protein YCR043C	0	0	1	1
sp|P25646|PDP2_YEAST	P25646	PDP2_YEAST	PTC6	442	Saccharomyces cerevisiae (strain ATCC 204508 / S288c)	[Pyruvate dehydrogenase [acetyl-transferring]]-phosphatase 2, mitochondrial	0	0	1	0
sp|P26725|YUR1_YEAST	P26725	YUR1_YEAST	YUR1	428	Saccharomyces cerevisiae (strain ATCC 204508 / S288c)	Probable mannosyltransferase YUR1	0	0	1	0
sp|P29295|HRR25_YEAST	P29295	HRR25_YEAST	HRR25	494	Saccharomyces cerevisiae (strain ATCC 204508 / S288c)	Casein kinase I homolog HRR25	0	0	1	1
sp|P31334|RM09_YEAST	P31334	RM09_YEAST	MRPL9	269	Saccharomyces cerevisiae (strain ATCC 204508 / S288c)	Large ribosomal subunit protein uL3m	0	0	1	3
sp|P32263|P5CR_YEAST	P32263	P5CR_YEAST	PRO3	286	Saccharomyces cerevisiae (strain ATCC 204508 / S288c)	Pyrroline-5-carboxylate reductase	0	0	1	0
sp|P32336|NUD1_YEAST	P32336	NUD1_YEAST	NUD1	851	Saccharomyces cerevisiae (strain ATCC 204508 / S288c)	Protein NUD1	2	0	1	0
sp|P32463|ACPM_YEAST	P32463	ACPM_YEAST	ACP1	125	Saccharomyces cerevisiae (strain ATCC 204508 / S288c)	Acyl carrier protein, mitochondrial	0	0	1	3
sp|P32487|LYP1_YEAST	P32487	LYP1_YEAST	LYP1	611	Saccharomyces cerevisiae (strain ATCC 204508 / S288c)	Lysine-specific permease	0	0	1	2
sp|P32621|GDA1_YEAST	P32621	GDA1_YEAST	GDA1	518	Saccharomyces cerevisiae (strain ATCC 204508 / S288c)	Guanosine-diphosphatase	0	0	1	3
sp|P32642|GLRX4_YEAST	P32642	GLRX4_YEAST	GRX4	244	Saccharomyces cerevisiae (strain ATCC 204508 / S288c)	Monothiol glutaredoxin-4	0	0	1	3
sp|P32911|SUI1_YEAST	P32911	SUI1_YEAST	SUI1	108	Saccharomyces cerevisiae (strain ATCC 204508 / S288c)	Eukaryotic translation initiation factor eIF-1	0	0	1	2
sp|P34216|EDE1_YEAST	P34216	EDE1_YEAST	EDE1	1381	Saccharomyces cerevisiae (strain ATCC 204508 / S288c)	EH domain-containing and endocytosis protein 1	0	0	1	0
sp|P35735|SFK1_YEAST	P35735	SFK1_YEAST	SFK1	353	Saccharomyces cerevisiae (strain ATCC 204508 / S288c)	Protein SFK1	0	0	1	2
sp|P35996|RM38_YEAST	P35996	RM38_YEAST	MRPL38	138	Saccharomyces cerevisiae (strain ATCC 204508 / S288c)	Large ribosomal subunit protein uL14m	0	0	1	4
sp|P36017|VPS21_YEAST	P36017	VPS21_YEAST	VPS21	210	Saccharomyces cerevisiae (strain ATCC 204508 / S288c)	Vacuolar protein sorting-associated protein 21	0	0	1	2
sp|P36125|GMH1_YEAST	P36125	GMH1_YEAST	GMH1	273	Saccharomyces cerevisiae (strain ATCC 204508 / S288c)	Protein GMH1	0	0	1	0
sp|P36131|SPC34_YEAST	P36131	SPC34_YEAST	SPC34	295	Saccharomyces cerevisiae (strain ATCC 204508 / S288c)	DASH complex subunit SPC34	0	0	1	1
sp|P36519|RM07_YEAST	P36519	RM07_YEAST	MRPL7	292	Saccharomyces cerevisiae (strain ATCC 204508 / S288c)	Large ribosomal subunit protein uL5m	0	0	1	1
sp|P36520|RM10_YEAST	P36520	RM10_YEAST	MRPL10	322	Saccharomyces cerevisiae (strain ATCC 204508 / S288c)	Large ribosomal subunit protein uL15m	0	0	1	1
sp|P37302|APE3_YEAST	P37302	APE3_YEAST	APE3	537	Saccharomyces cerevisiae (strain ATCC 204508 / S288c)	Aminopeptidase Y	0	0	1	1
sp|P38144|ISW1_YEAST	P38144	ISW1_YEAST	ISW1	1129	Saccharomyces cerevisiae (strain ATCC 204508 / S288c)	ISWI chromatin-remodeling complex ATPase ISW1	0	0	1	3
sp|P38164|SEA4_YEAST	P38164	SEA4_YEAST	SEA4	1038	Saccharomyces cerevisiae (strain ATCC 204508 / S288c)	SEH-associated protein 4	0	0	1	1
sp|P38176|AVT5_YEAST	P38176	AVT5_YEAST	AVT5	459	Saccharomyces cerevisiae (strain ATCC 204508 / S288c)	Vacuolar amino acid transporter 5	0	0	1	0
sp|P38249|EIF3A_YEAST	P38249	EIF3A_YEAST	RPG1	964	Saccharomyces cerevisiae (strain ATCC 204508 / S288c)	Eukaryotic translation initiation factor 3 subunit A	1	0	1	2
sp|P38318|YB70_YEAST	P38318	YB70_YEAST	YBR220C	560	Saccharomyces cerevisiae (strain ATCC 204508 / S288c)	Uncharacterized membrane protein YBR220C	0	0	1	5
sp|P38339|RGD1_YEAST	P38339	RGD1_YEAST	RGD1	666	Saccharomyces cerevisiae (strain ATCC 204508 / S288c)	RHO GTPase-activating protein RGD1	0	0	1	0
sp|P38604|ERG7_YEAST	P38604	ERG7_YEAST	ERG7	731	Saccharomyces cerevisiae (strain ATCC 204508 / S288c)	Lanosterol synthase ERG7	0	0	1	1
sp|P38623|RCK2_YEAST	P38623	RCK2_YEAST	RCK2	610	Saccharomyces cerevisiae (strain ATCC 204508 / S288c)	Serine/threonine-protein kinase RCK2	0	0	1	0
sp|P38707|SYNC_YEAST	P38707	SYNC_YEAST	DED81	554	Saccharomyces cerevisiae (strain ATCC 204508 / S288c)	Asparagine--tRNA ligase, cytoplasmic	0	0	1	0
sp|P38755|OSH7_YEAST	P38755	OSH7_YEAST	OSH7	437	Saccharomyces cerevisiae (strain ATCC 204508 / S288c)	Oxysterol-binding protein homolog 7	0	0	1	2
sp|P39015|STM1_YEAST	P39015	STM1_YEAST	STM1	273	Saccharomyces cerevisiae (strain ATCC 204508 / S288c)	Suppressor protein STM1	0	0	1	1
sp|P39113|CAT8_YEAST	P39113	CAT8_YEAST	CAT8	1433	Saccharomyces cerevisiae (strain ATCC 204508 / S288c)	Regulatory protein CAT8	0	0	1	1
sp|P39535|PHO90_YEAST	P39535	PHO90_YEAST	PHO90	881	Saccharomyces cerevisiae (strain ATCC 204508 / S288c)	Low-affinity phosphate transporter PHO90	0	0	1	1
sp|P39542|YJT3_YEAST	P39542	YJT3_YEAST	YJL193W	402	Saccharomyces cerevisiae (strain ATCC 204508 / S288c)	Uncharacterized transporter YJL193W	0	0	1	2
sp|P39547|UIP3_YEAST	P39547	UIP3_YEAST	UIP3	235	Saccharomyces cerevisiae (strain ATCC 204508 / S288c)	ULP1-interacting protein 3	0	0	1	1
sp|P39702|VPS8_YEAST	P39702	VPS8_YEAST	VPS8	1274	Saccharomyces cerevisiae (strain ATCC 204508 / S288c)	Vacuolar protein sorting-associated protein 8	0	0	1	3
sp|P39985|DPO5_YEAST	P39985	DPO5_YEAST	POL5	1022	Saccharomyces cerevisiae (strain ATCC 204508 / S288c)	rDNA transcriptional regulator POL5	0	0	1	1
sp|P40159|YNU8_YEAST	P40159	YNU8_YEAST	YNL208W	199	Saccharomyces cerevisiae (strain ATCC 204508 / S288c)	Uncharacterized protein YNL208W	0	0	1	0
sp|P40260|MEP1_YEAST	P40260	MEP1_YEAST	MEP1	492	Saccharomyces cerevisiae (strain ATCC 204508 / S288c)	Ammonium transporter MEP1	0	0	1	0
sp|P40345|PDAT_YEAST	P40345	PDAT_YEAST	LRO1	661	Saccharomyces cerevisiae (strain ATCC 204508 / S288c)	Phospholipid:diacylglycerol acyltransferase	0	0	1	1
sp|P40478|VDAC2_YEAST	P40478	VDAC2_YEAST	POR2	281	Saccharomyces cerevisiae (strain ATCC 204508 / S288c)	Mitochondrial outer membrane protein porin 2	0	0	1	2
sp|P41733|CDC91_YEAST	P41733	CDC91_YEAST	GAB1	394	Saccharomyces cerevisiae (strain ATCC 204508 / S288c)	GPI transamidase component GAB1	0	0	1	1
sp|P41815|BAP3_YEAST	P41815	BAP3_YEAST	BAP3	604	Saccharomyces cerevisiae (strain ATCC 204508 / S288c)	Valine amino-acid permease	0	0	1	3
sp|P41903|PTE1_YEAST	P41903	PTE1_YEAST	TES1	349	Saccharomyces cerevisiae (strain ATCC 204508 / S288c)	Peroxisomal acyl-coenzyme A thioester hydrolase 1	1	0	1	0
sp|P41940|MPG1_YEAST	P41940	MPG1_YEAST	PSA1	361	Saccharomyces cerevisiae (strain ATCC 204508 / S288c)	Mannose-1-phosphate guanyltransferase	0	0	1	2
sp|P42840|YN60_YEAST	P42840	YN60_YEAST	YNL320W	284	Saccharomyces cerevisiae (strain ATCC 204508 / S288c)	Uncharacterized membrane protein YNL320W	0	0	1	3
sp|P43593|UBP6_YEAST	P43593	UBP6_YEAST	UBP6	499	Saccharomyces cerevisiae (strain ATCC 204508 / S288c)	Ubiquitin carboxyl-terminal hydrolase 6	0	0	1	0
sp|P43616|DUG1_YEAST	P43616	DUG1_YEAST	DUG1	481	Saccharomyces cerevisiae (strain ATCC 204508 / S288c)	Cys-Gly metallodipeptidase DUG1	0	0	1	0
sp|P46655|SYEC_YEAST	P46655	SYEC_YEAST	GUS1	708	Saccharomyces cerevisiae (strain ATCC 204508 / S288c)	Glutamate--tRNA ligase, cytoplasmic	4	0	1	3
sp|P46669|RPA43_YEAST	P46669	RPA43_YEAST	RPA43	326	Saccharomyces cerevisiae (strain ATCC 204508 / S288c)	DNA-directed RNA polymerase I subunit RPA43	9	7	1	3
sp|P47111|VPS55_YEAST	P47111	VPS55_YEAST	VPS55	140	Saccharomyces cerevisiae (strain ATCC 204508 / S288c)	Vacuolar protein sorting-associated protein 55	0	0	1	1
sp|P47117|ARP3_YEAST	P47117	ARP3_YEAST	ARP3	449	Saccharomyces cerevisiae (strain ATCC 204508 / S288c)	Actin-related protein 3	0	0	1	1
sp|P47122|GPN1_YEAST	P47122	GPN1_YEAST	NPA3	385	Saccharomyces cerevisiae (strain ATCC 204508 / S288c)	GPN-loop GTPase 1	0	0	1	0
sp|P47141|RT26_YEAST	P47141	RT26_YEAST	RSM26	266	Saccharomyces cerevisiae (strain ATCC 204508 / S288c)	Small ribosomal subunit protein mS42	0	0	1	2
sp|P47159|YJ94_YEAST	P47159	YJ94_YEAST	YJR124C	448	Saccharomyces cerevisiae (strain ATCC 204508 / S288c)	Uncharacterized membrane protein YJR124C	0	0	1	3
sp|P53040|TAF6_YEAST	P53040	TAF6_YEAST	TAF6	516	Saccharomyces cerevisiae (strain ATCC 204508 / S288c)	Transcription initiation factor TFIID subunit 6	0	0	1	1
sp|P53115|INO80_YEAST	P53115	INO80_YEAST	INO80	1489	Saccharomyces cerevisiae (strain ATCC 204508 / S288c)	Chromatin-remodeling ATPase INO80	0	0	1	0
sp|P53142|VPS73_YEAST	P53142	VPS73_YEAST	VPS73	486	Saccharomyces cerevisiae (strain ATCC 204508 / S288c)	Vacuolar protein sorting-associated protein 73	0	0	1	2
sp|P53209|YG1A_YEAST	P53209	YG1A_YEAST	YGR016W	190	Saccharomyces cerevisiae (strain ATCC 204508 / S288c)	Uncharacterized membrane protein YGR016W	0	0	1	0
sp|P53217|YG1I_YEAST	P53217	YG1I_YEAST	YGR026W	278	Saccharomyces cerevisiae (strain ATCC 204508 / S288c)	Uncharacterized membrane protein YGR026W	0	0	1	6
sp|P53285|VPS62_YEAST	P53285	VPS62_YEAST	VPS62	467	Saccharomyces cerevisiae (strain ATCC 204508 / S288c)	Vacuolar protein sorting-associated protein 62	0	0	1	1
sp|P53731|ARPC2_YEAST	P53731	ARPC2_YEAST	ARC35	342	Saccharomyces cerevisiae (strain ATCC 204508 / S288c)	Actin-related protein 2/3 complex subunit 2	0	0	1	0
sp|P53896|PGA1_YEAST	P53896	PGA1_YEAST	PGA1	198	Saccharomyces cerevisiae (strain ATCC 204508 / S288c)	GPI mannosyltransferase 2 subunit PGA1	0	0	1	0
sp|P54070|KTR6_YEAST	P54070	KTR6_YEAST	KTR6	446	Saccharomyces cerevisiae (strain ATCC 204508 / S288c)	Mannosyltransferase KTR6	0	0	1	1
sp|P61829|ATP9_YEAST	P61829	ATP9_YEAST	OLI1	76	Saccharomyces cerevisiae (strain ATCC 204508 / S288c)	ATP synthase subunit 9, mitochondrial	0	0	1	0
sp|P89886|TMA20_YEAST	P89886	TMA20_YEAST	TMA20	181	Saccharomyces cerevisiae (strain ATCC 204508 / S288c)	Translation machinery-associated protein 20	0	0	1	1
sp|Q01662|MAP1_YEAST	Q01662	MAP1_YEAST	MAP1	387	Saccharomyces cerevisiae (strain ATCC 204508 / S288c)	Methionine aminopeptidase 1	0	0	1	1
sp|Q02199|NUP49_YEAST	Q02199	NUP49_YEAST	NUP49	472	Saccharomyces cerevisiae (strain ATCC 204508 / S288c)	Nucleoporin NUP49/NSP49	0	0	1	3
sp|Q02204|RM13_YEAST	Q02204	RM13_YEAST	MRPL13	264	Saccharomyces cerevisiae (strain ATCC 204508 / S288c)	Large ribosomal subunit protein mL50	0	0	1	2
sp|Q02820|NCE1_YEAST	Q02820	NCE1_YEAST	NCE101	53	Saccharomyces cerevisiae (strain ATCC 204508 / S288c)	Non-classical export protein 1	0	0	1	3
sp|Q03048|COFI_YEAST	Q03048	COFI_YEAST	COF1	143	Saccharomyces cerevisiae (strain ATCC 204508 / S288c)	Cofilin	0	0	1	1
sp|Q03246|RT17_YEAST	Q03246	RT17_YEAST	MRPS17	237	Saccharomyces cerevisiae (strain ATCC 204508 / S288c)	Small ribosomal subunit protein uS17m	0	0	1	2
sp|Q03419|IZH1_YEAST	Q03419	IZH1_YEAST	IZH1	316	Saccharomyces cerevisiae (strain ATCC 204508 / S288c)	ADIPOR-like receptor IZH1	0	0	1	1
sp|Q03532|HAS1_YEAST	Q03532	HAS1_YEAST	HAS1	505	Saccharomyces cerevisiae (strain ATCC 204508 / S288c)	ATP-dependent RNA helicase HAS1	0	0	1	0
sp|Q03655|GAS3_YEAST	Q03655	GAS3_YEAST	GAS3	524	Saccharomyces cerevisiae (strain ATCC 204508 / S288c)	Probable 1,3-beta-glucanosyltransferase GAS3	0	0	1	0
sp|Q03795|YM30_YEAST	Q03795	YM30_YEAST	YMR155W	547	Saccharomyces cerevisiae (strain ATCC 204508 / S288c)	Uncharacterized membrane protein YMR155W	0	0	1	2
sp|Q03799|RT08_YEAST	Q03799	RT08_YEAST	MRPS8	155	Saccharomyces cerevisiae (strain ATCC 204508 / S288c)	Small ribosomal subunit protein uS8m	0	0	1	2
[truncated: 114 more rows]

## Sheet: target enrichment HD 100microM
Gene.names	significant_HDA__vs__C	logFC_HDA__vs__C	P.Value_HDA__vs__C	adjusted p_Val_HDA__vs__C
[truncated: 217 more rows]

[truncated: 2 more sheets: target enrichment HD 10microM, Info]
